# Supplementary material
Source: MDPI journal article supplement (https://www.mdpi.com/2227-9040/3/2/36)
Supplement: s2 [file s2]

**OPEN ACCESS**

chemosensors

**ISSN 2227-9040**

www.mdpi.com/journal/chemosensors

Supplementary Information

Synthesis and Properties of 2'-Deoxyuridine Analogues Bearing Various Azobenzene Derivatives at the C5 Position *Chemosensors* 2015*, 3,* 36-54

Shohei Mori 1, Kunihiko Morihiro 1,2,*, Yuuya Kasahara 1,2, Shin-ichi Tsunoda 2 and
Satoshi Obika 1,2,*

1 Graduate School of Pharmaceutical Sciences, Osaka University, 1-6 Yamadaoka, Suita,
Osaka 565-0871, Japan; E-Mails: mori-s@phs.osaka-u.ac.jp (S.M.); y-kasahara@nibio.go.jp (Y.K.)

2 National Institute of Biomedical Innovation (NIBIO), 7-6-8 Saito-Asagi, Osaka 567-0085, Japan;
E-Mail: tsunoda@nibio.go.jp

***** Authors to whom correspondence should be addressed; E-Mails: k-morihiro@nibio.go.jp (K.M.); obika@phs.osaka-u.ac.jp (S.O.); Tel.: +81-72-641-9882 (K.M.); +81-6-6879-8200 (S.O.);
Fax: +81-72-641-9884 (K.M.); +81-6-6879-8204 (S.O.).

1. 1H, 13C and 31P Spectra of New Compounds


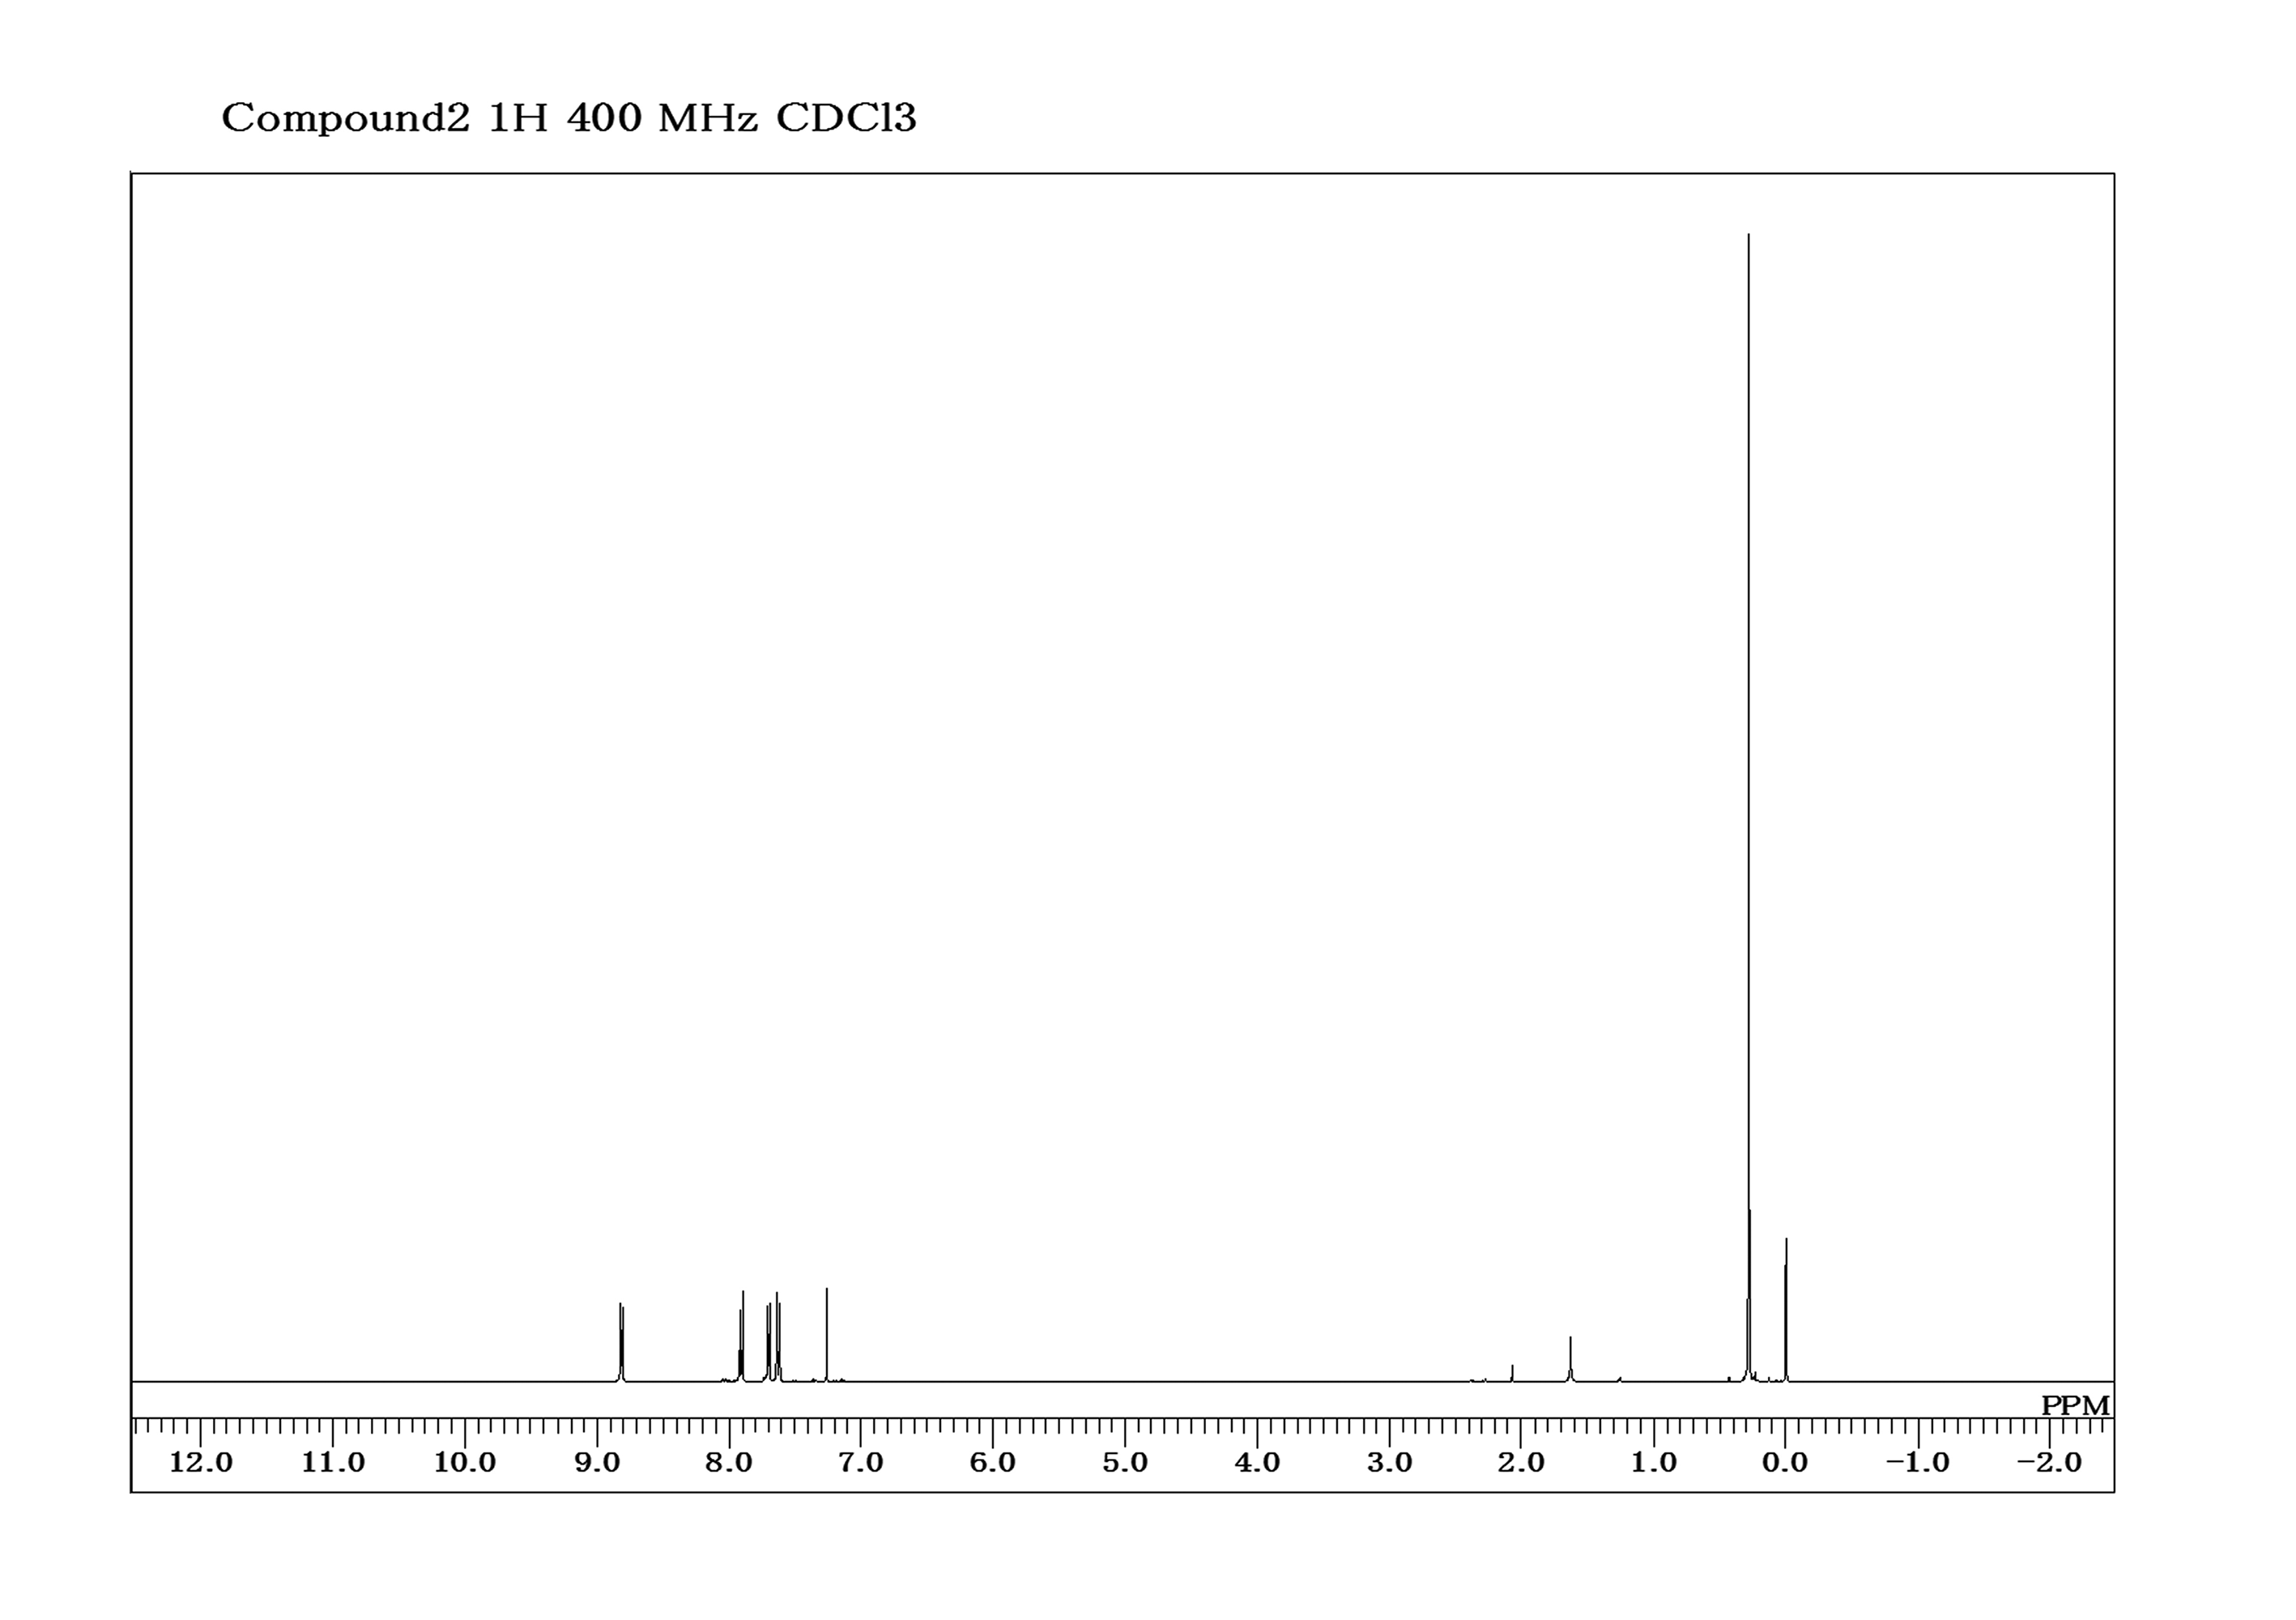


**Figure S1.** 1H-NMR spectrum of compound 2.


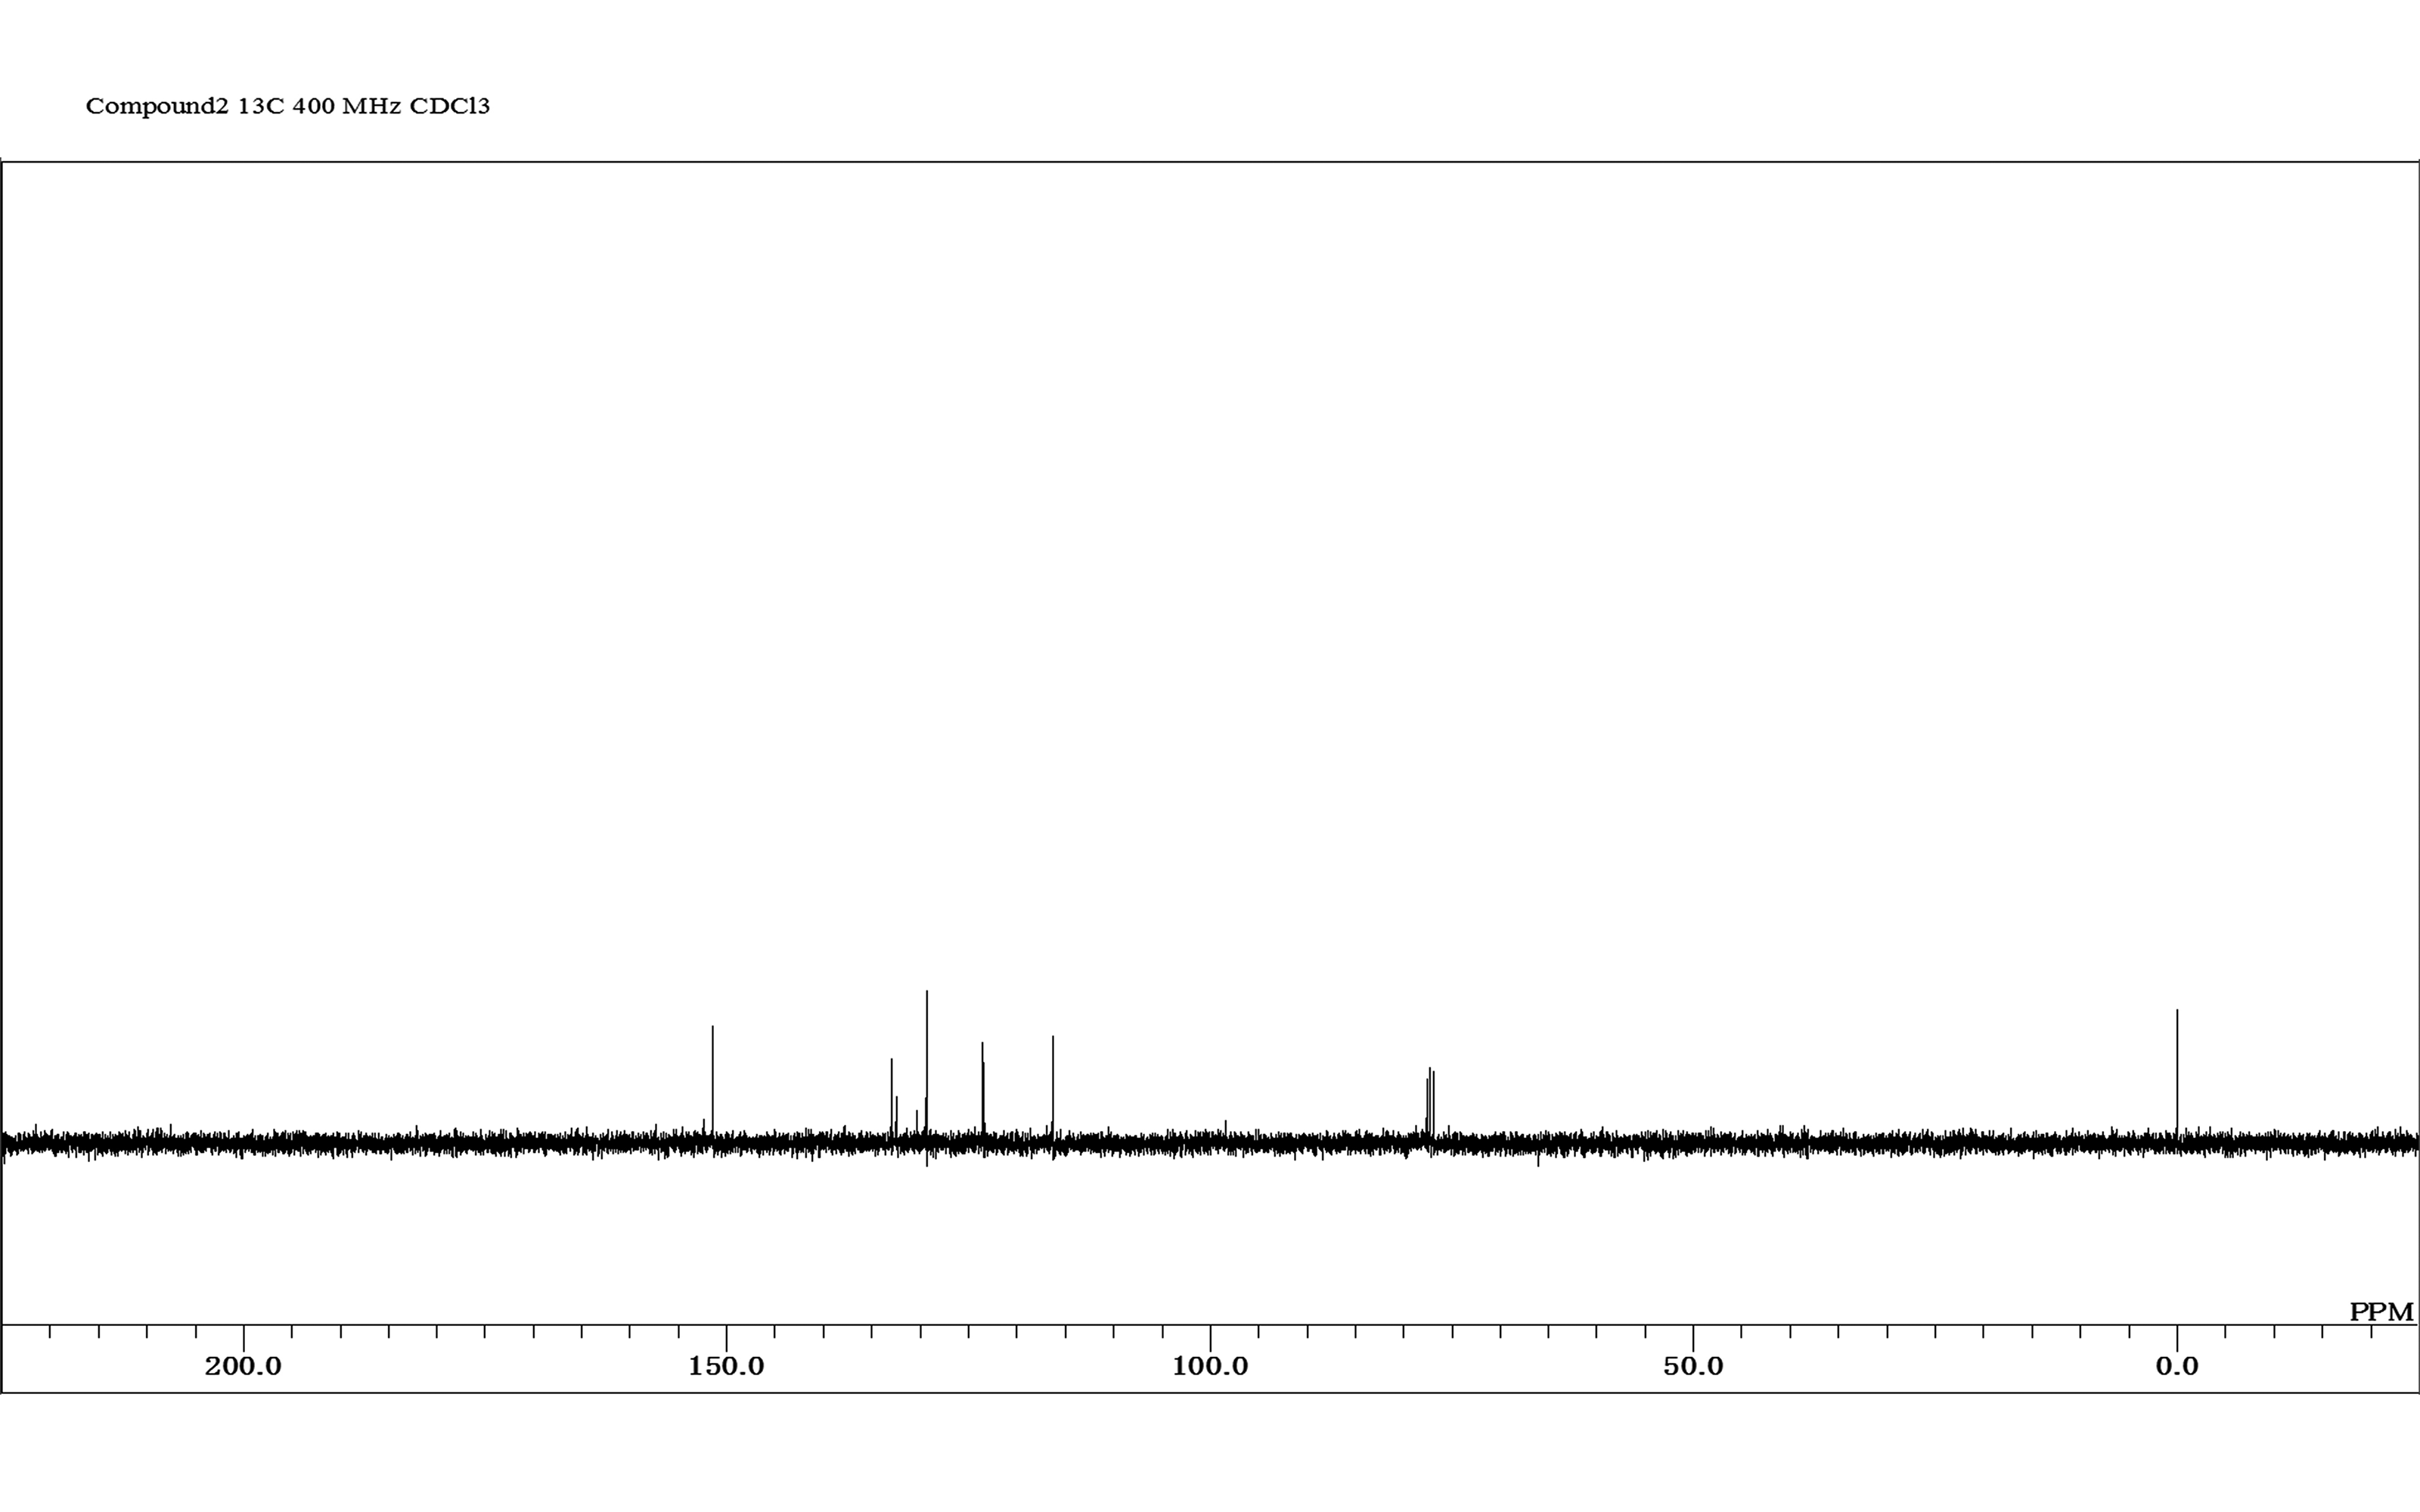


**Figure S2.** 13C-NMR spectrum of compound 2.


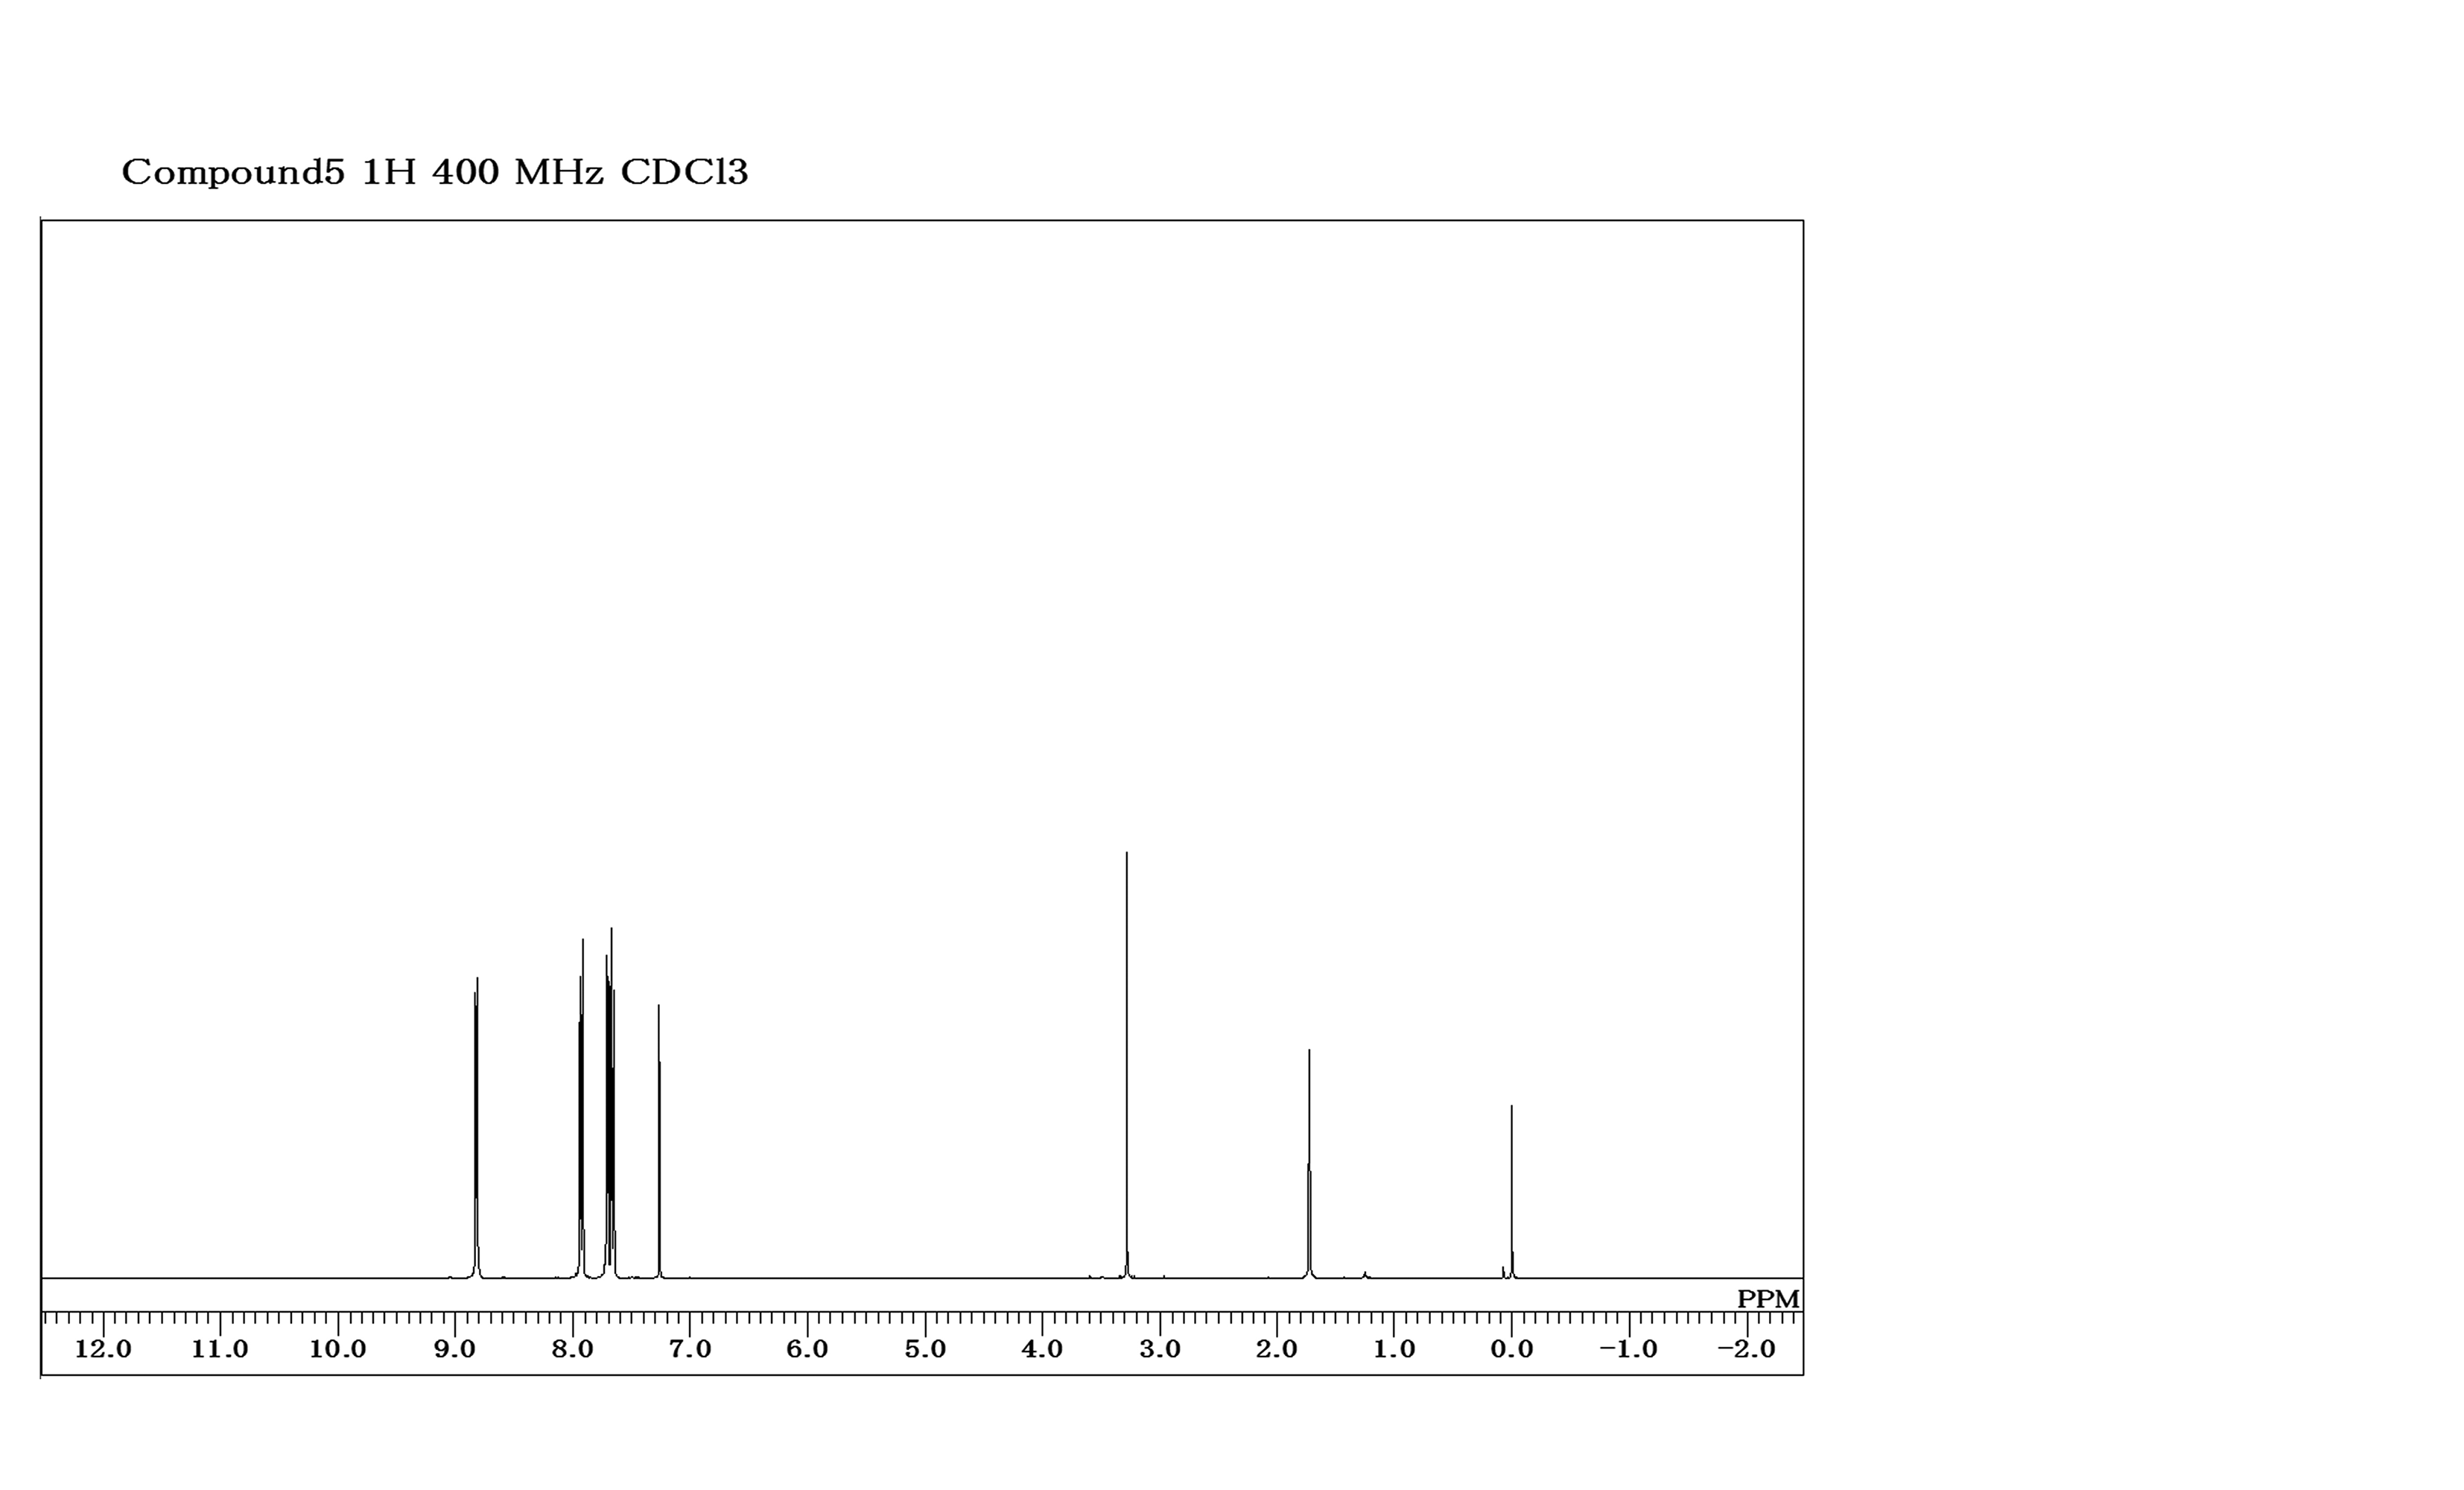


**Figure S3.** 1H-NMR spectrum of compound 5.


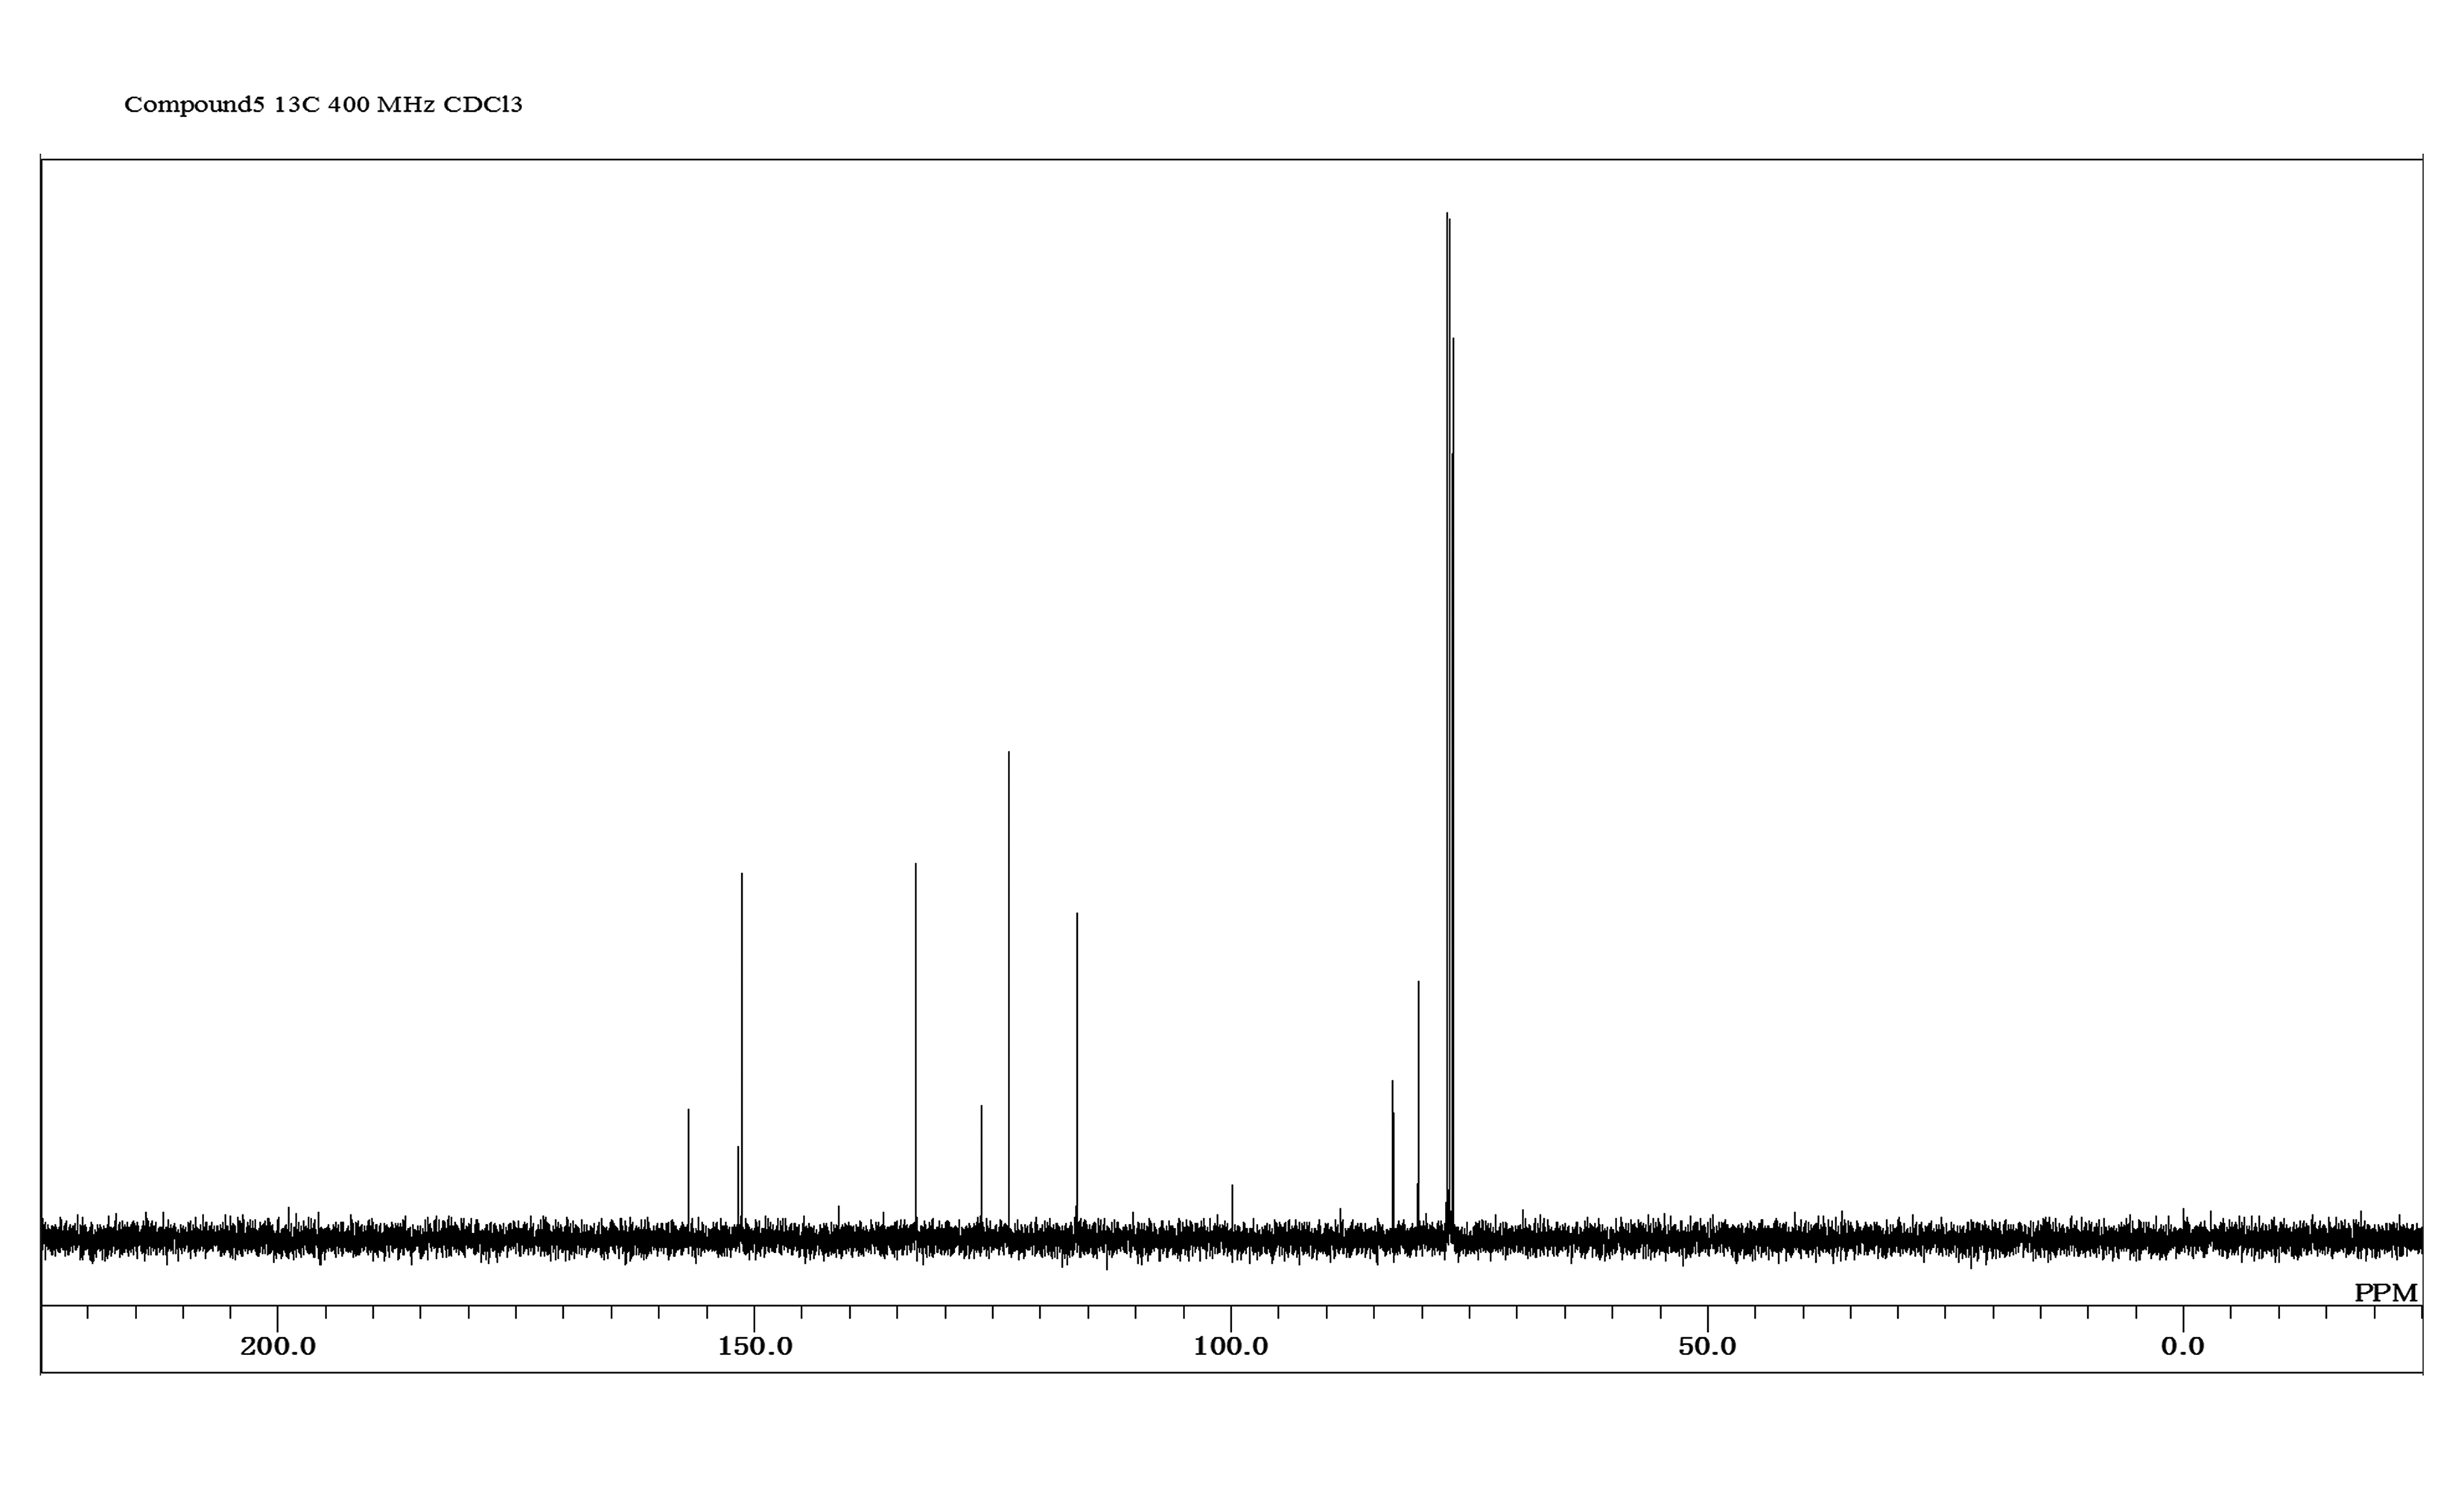


**Figure S4.** 13C-NMR spectrum of compound 5.


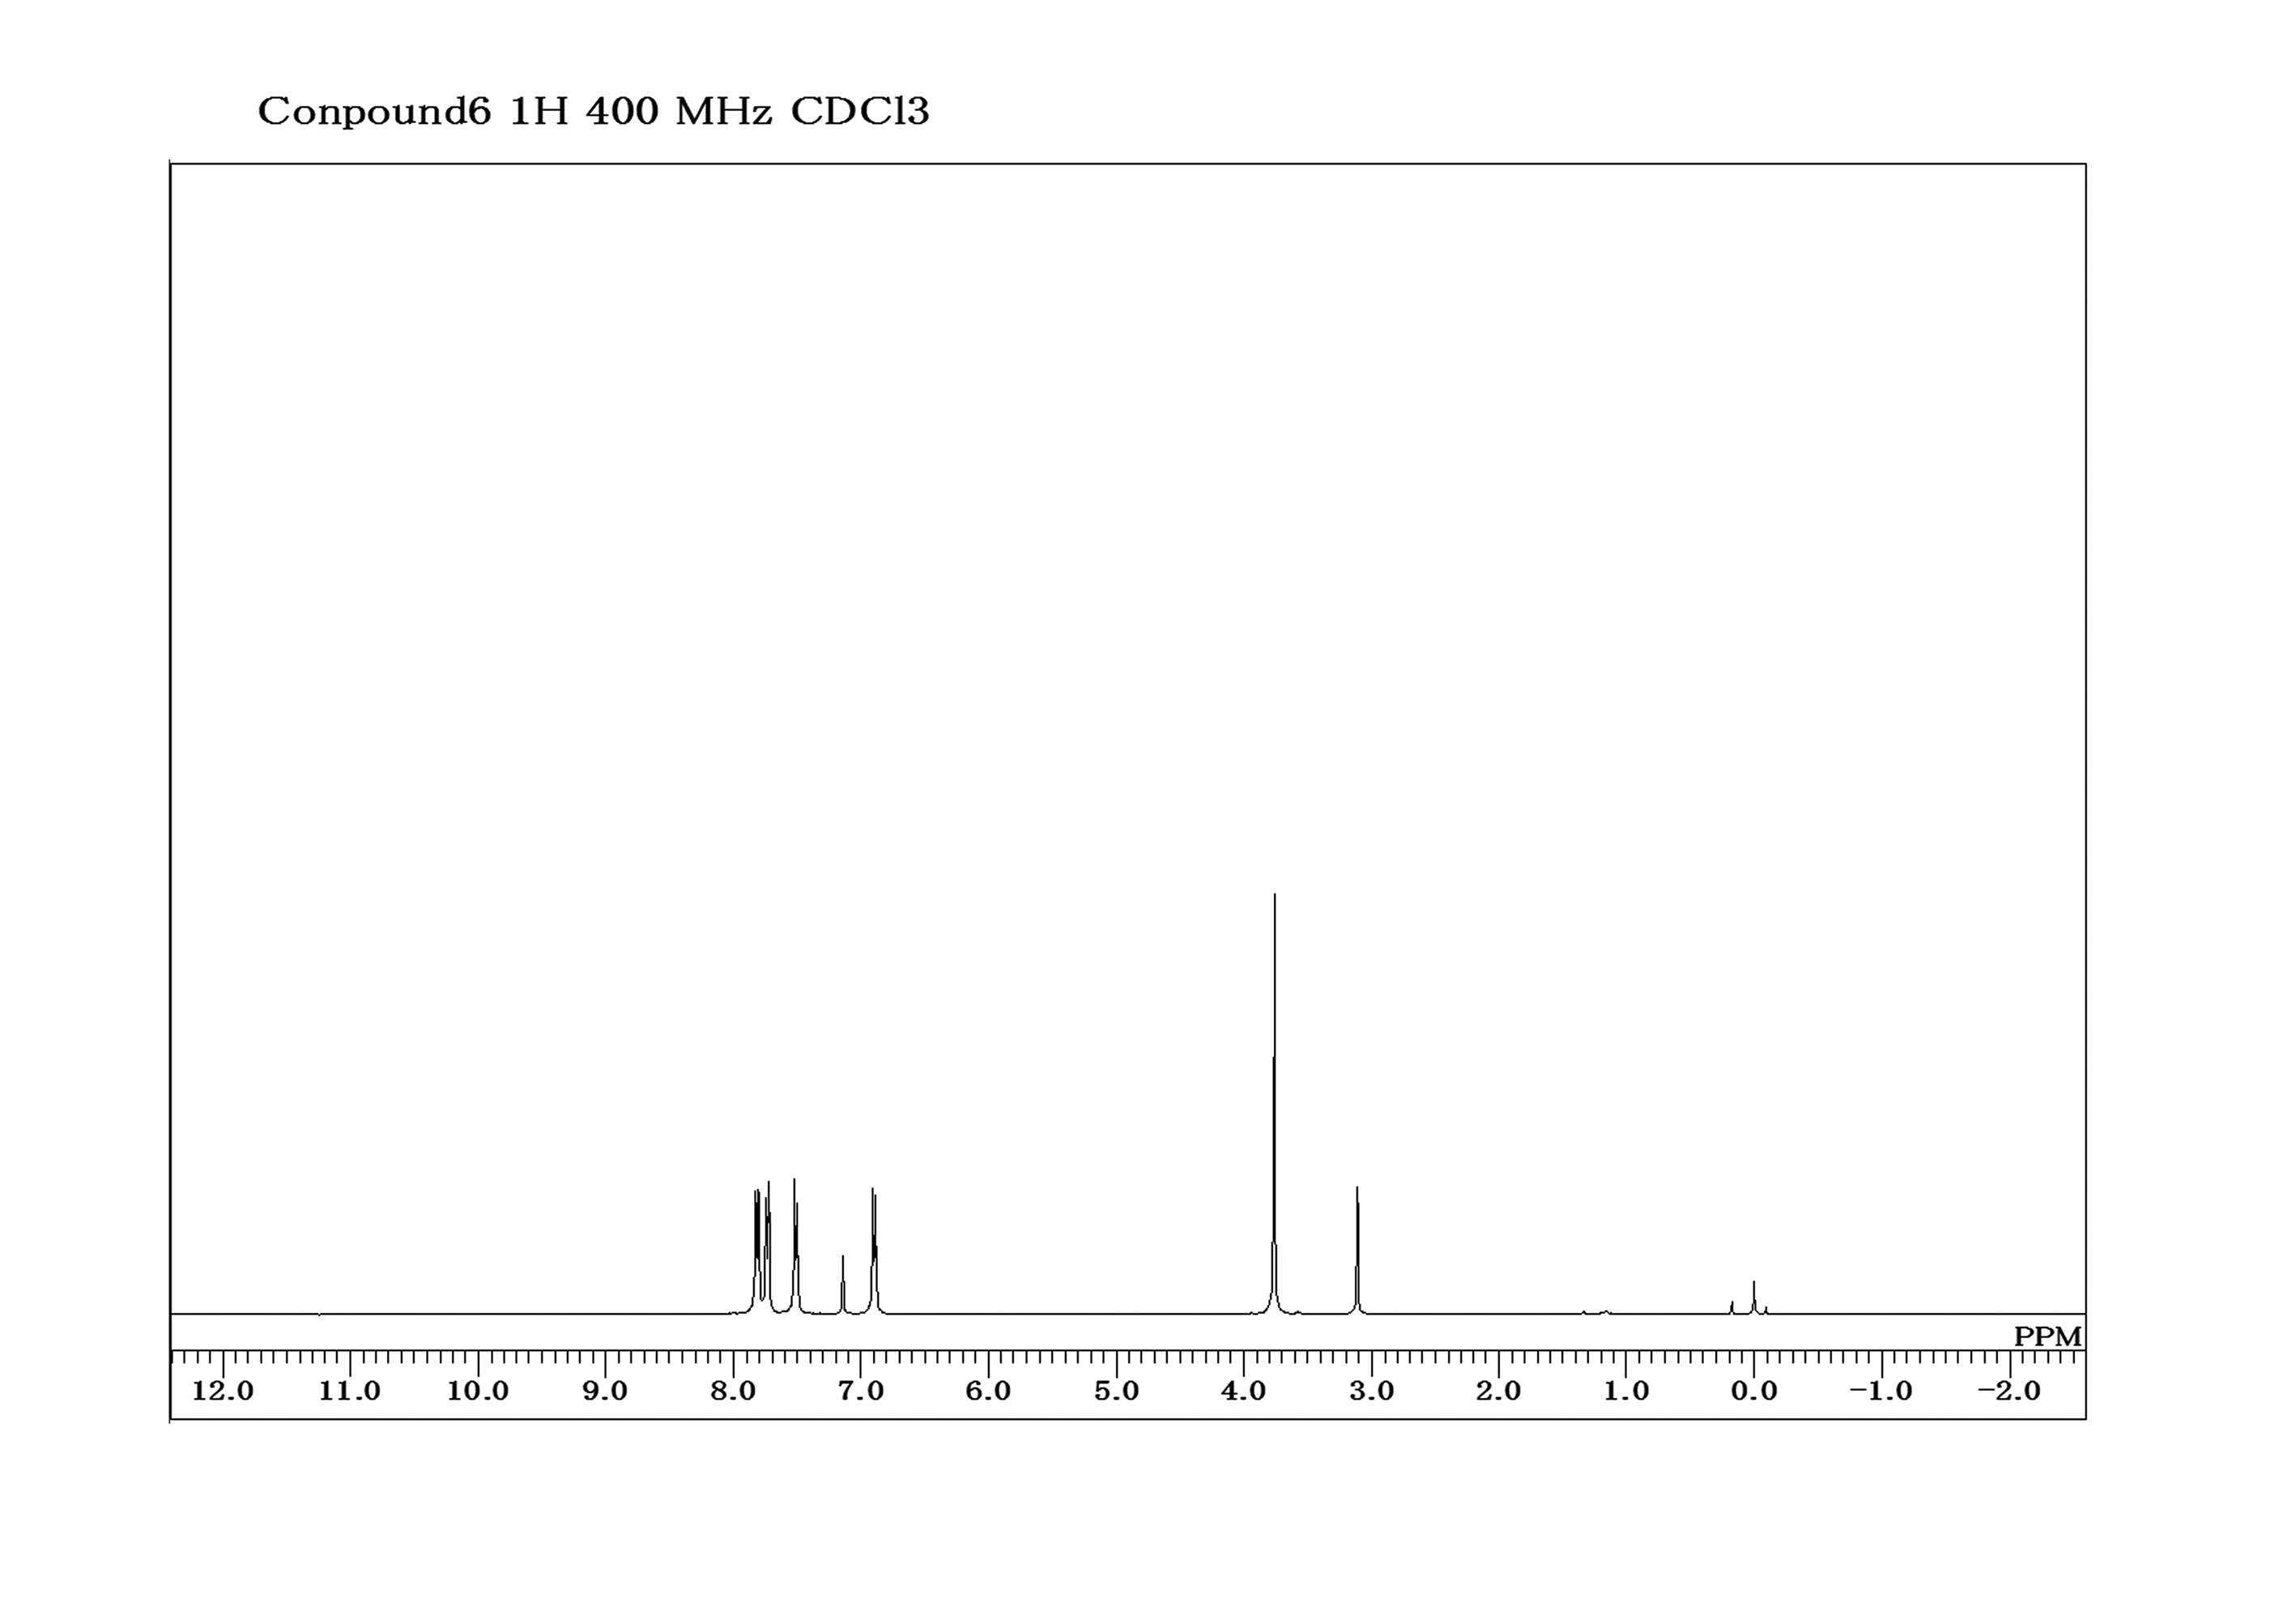


**Figure S5.** 1H-NMR spectrum of compound 6.


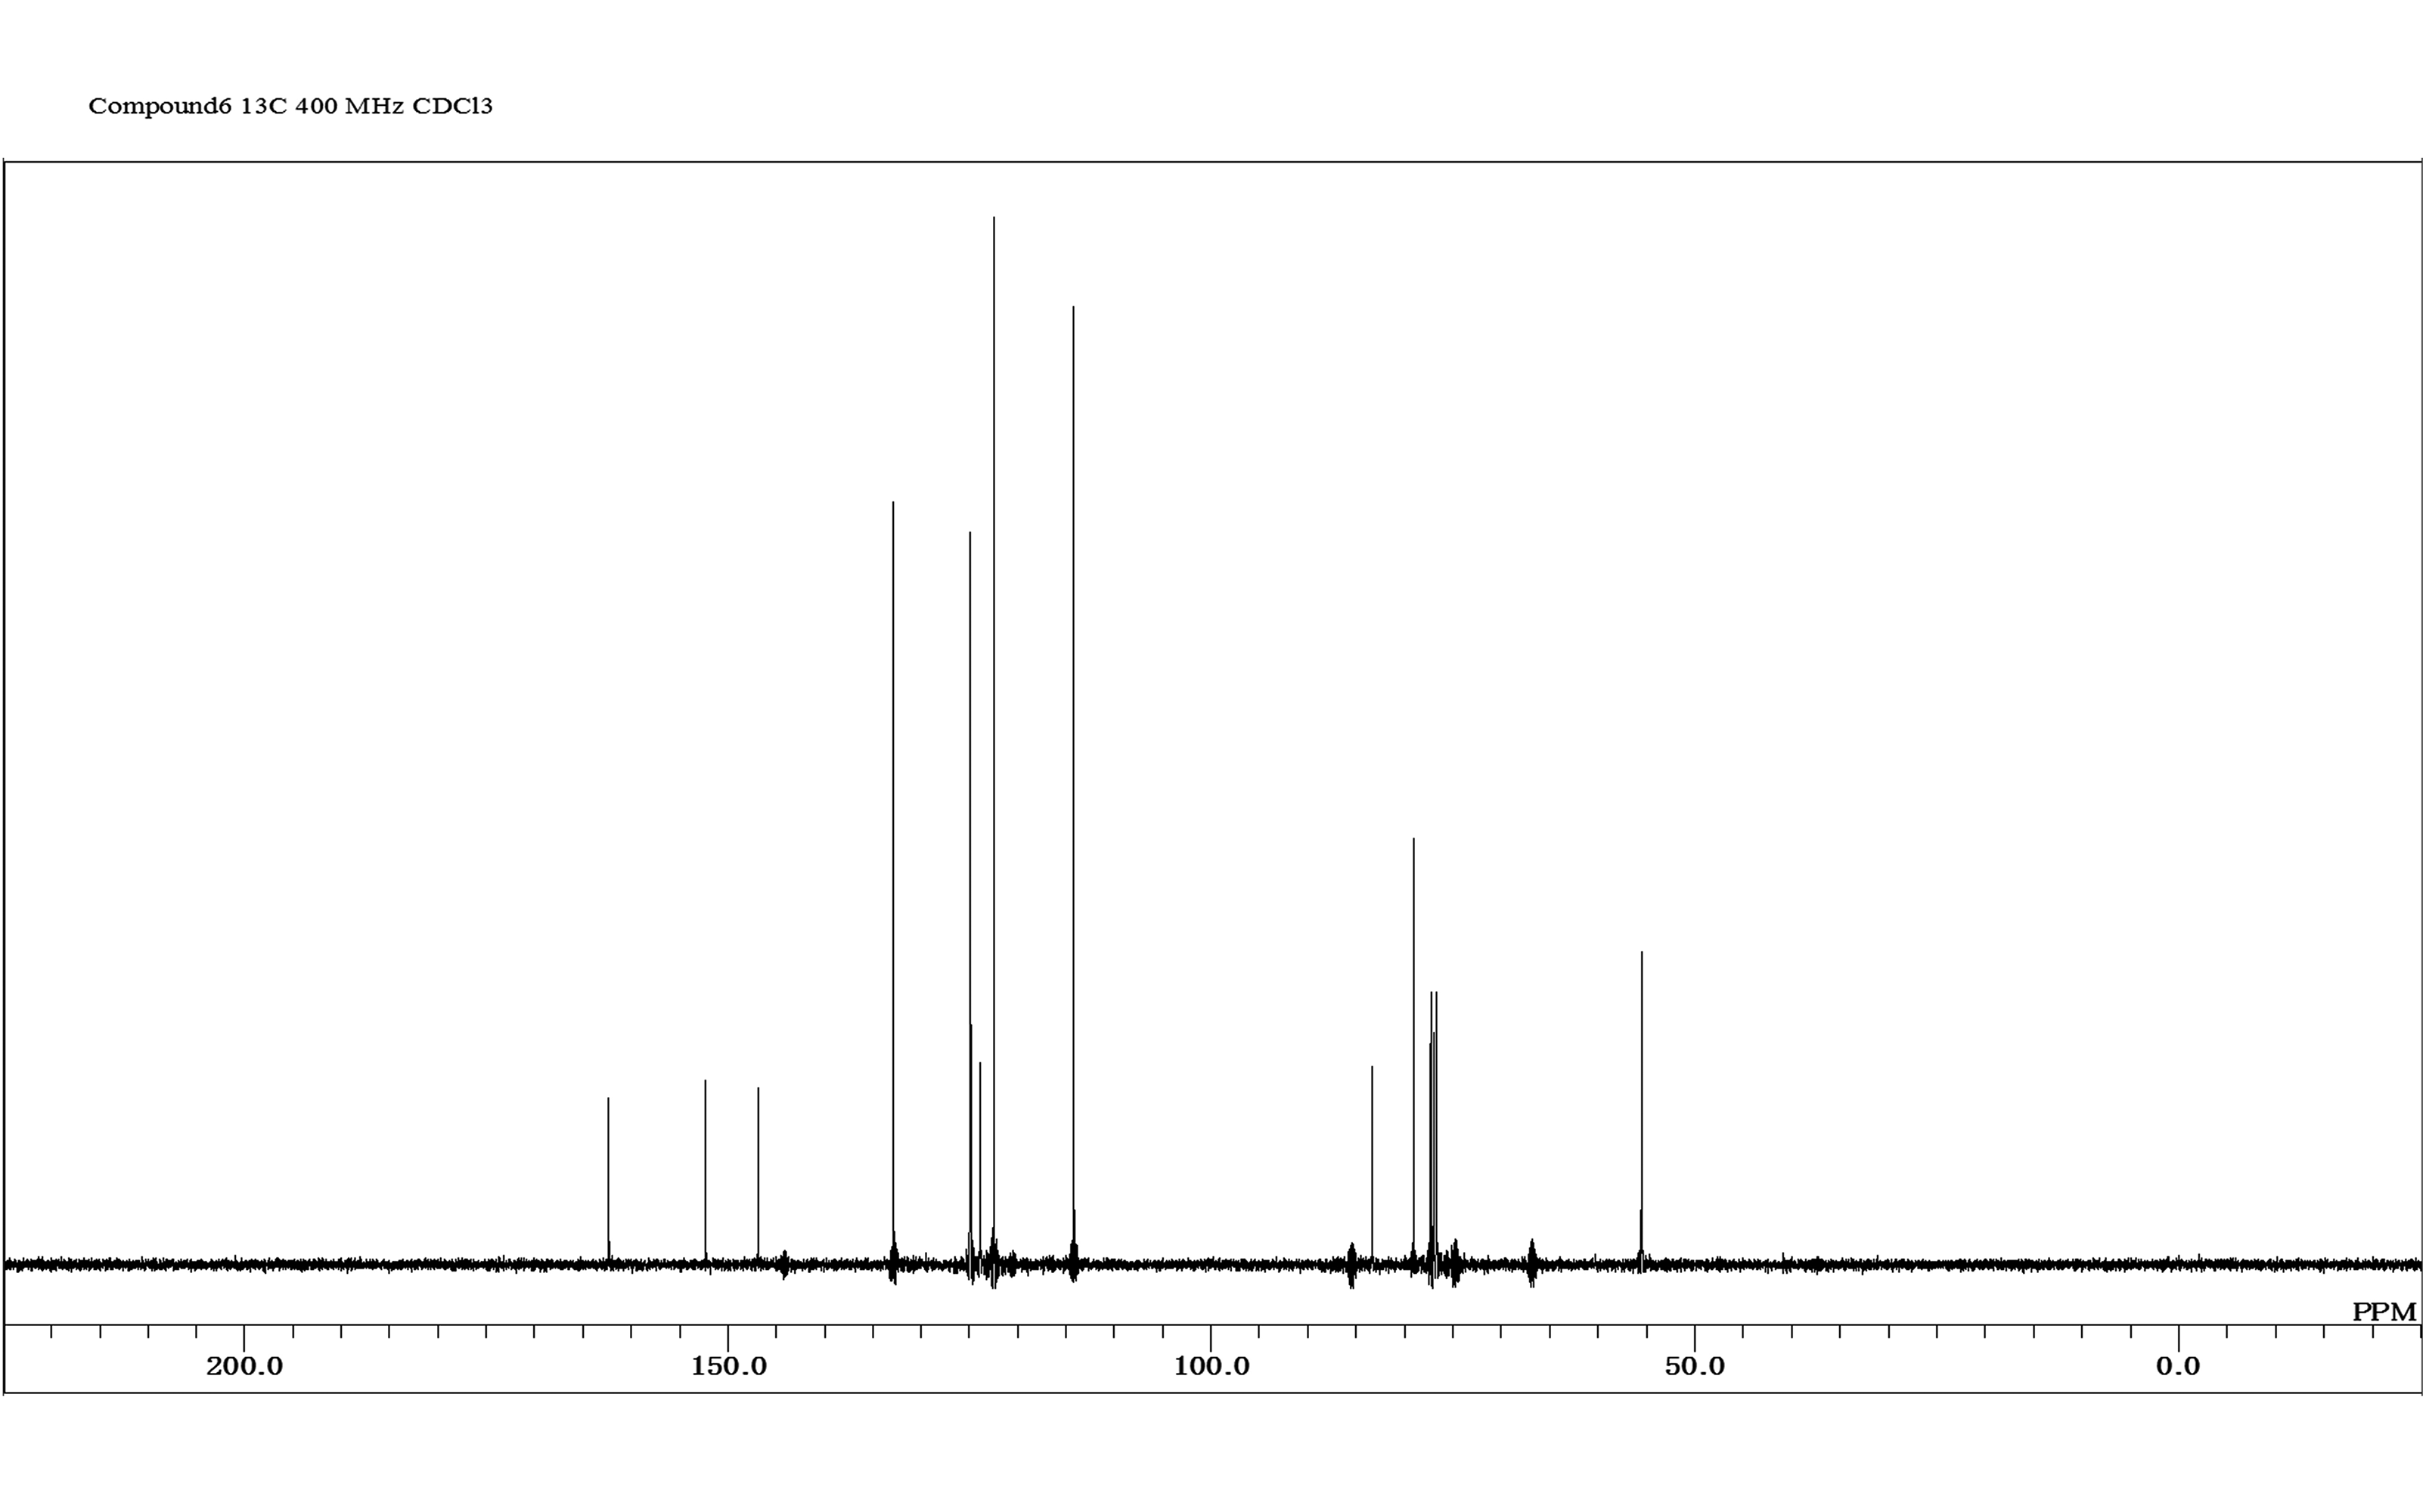


**Figure S6.** 13C-NMR spectrum of compound 6.


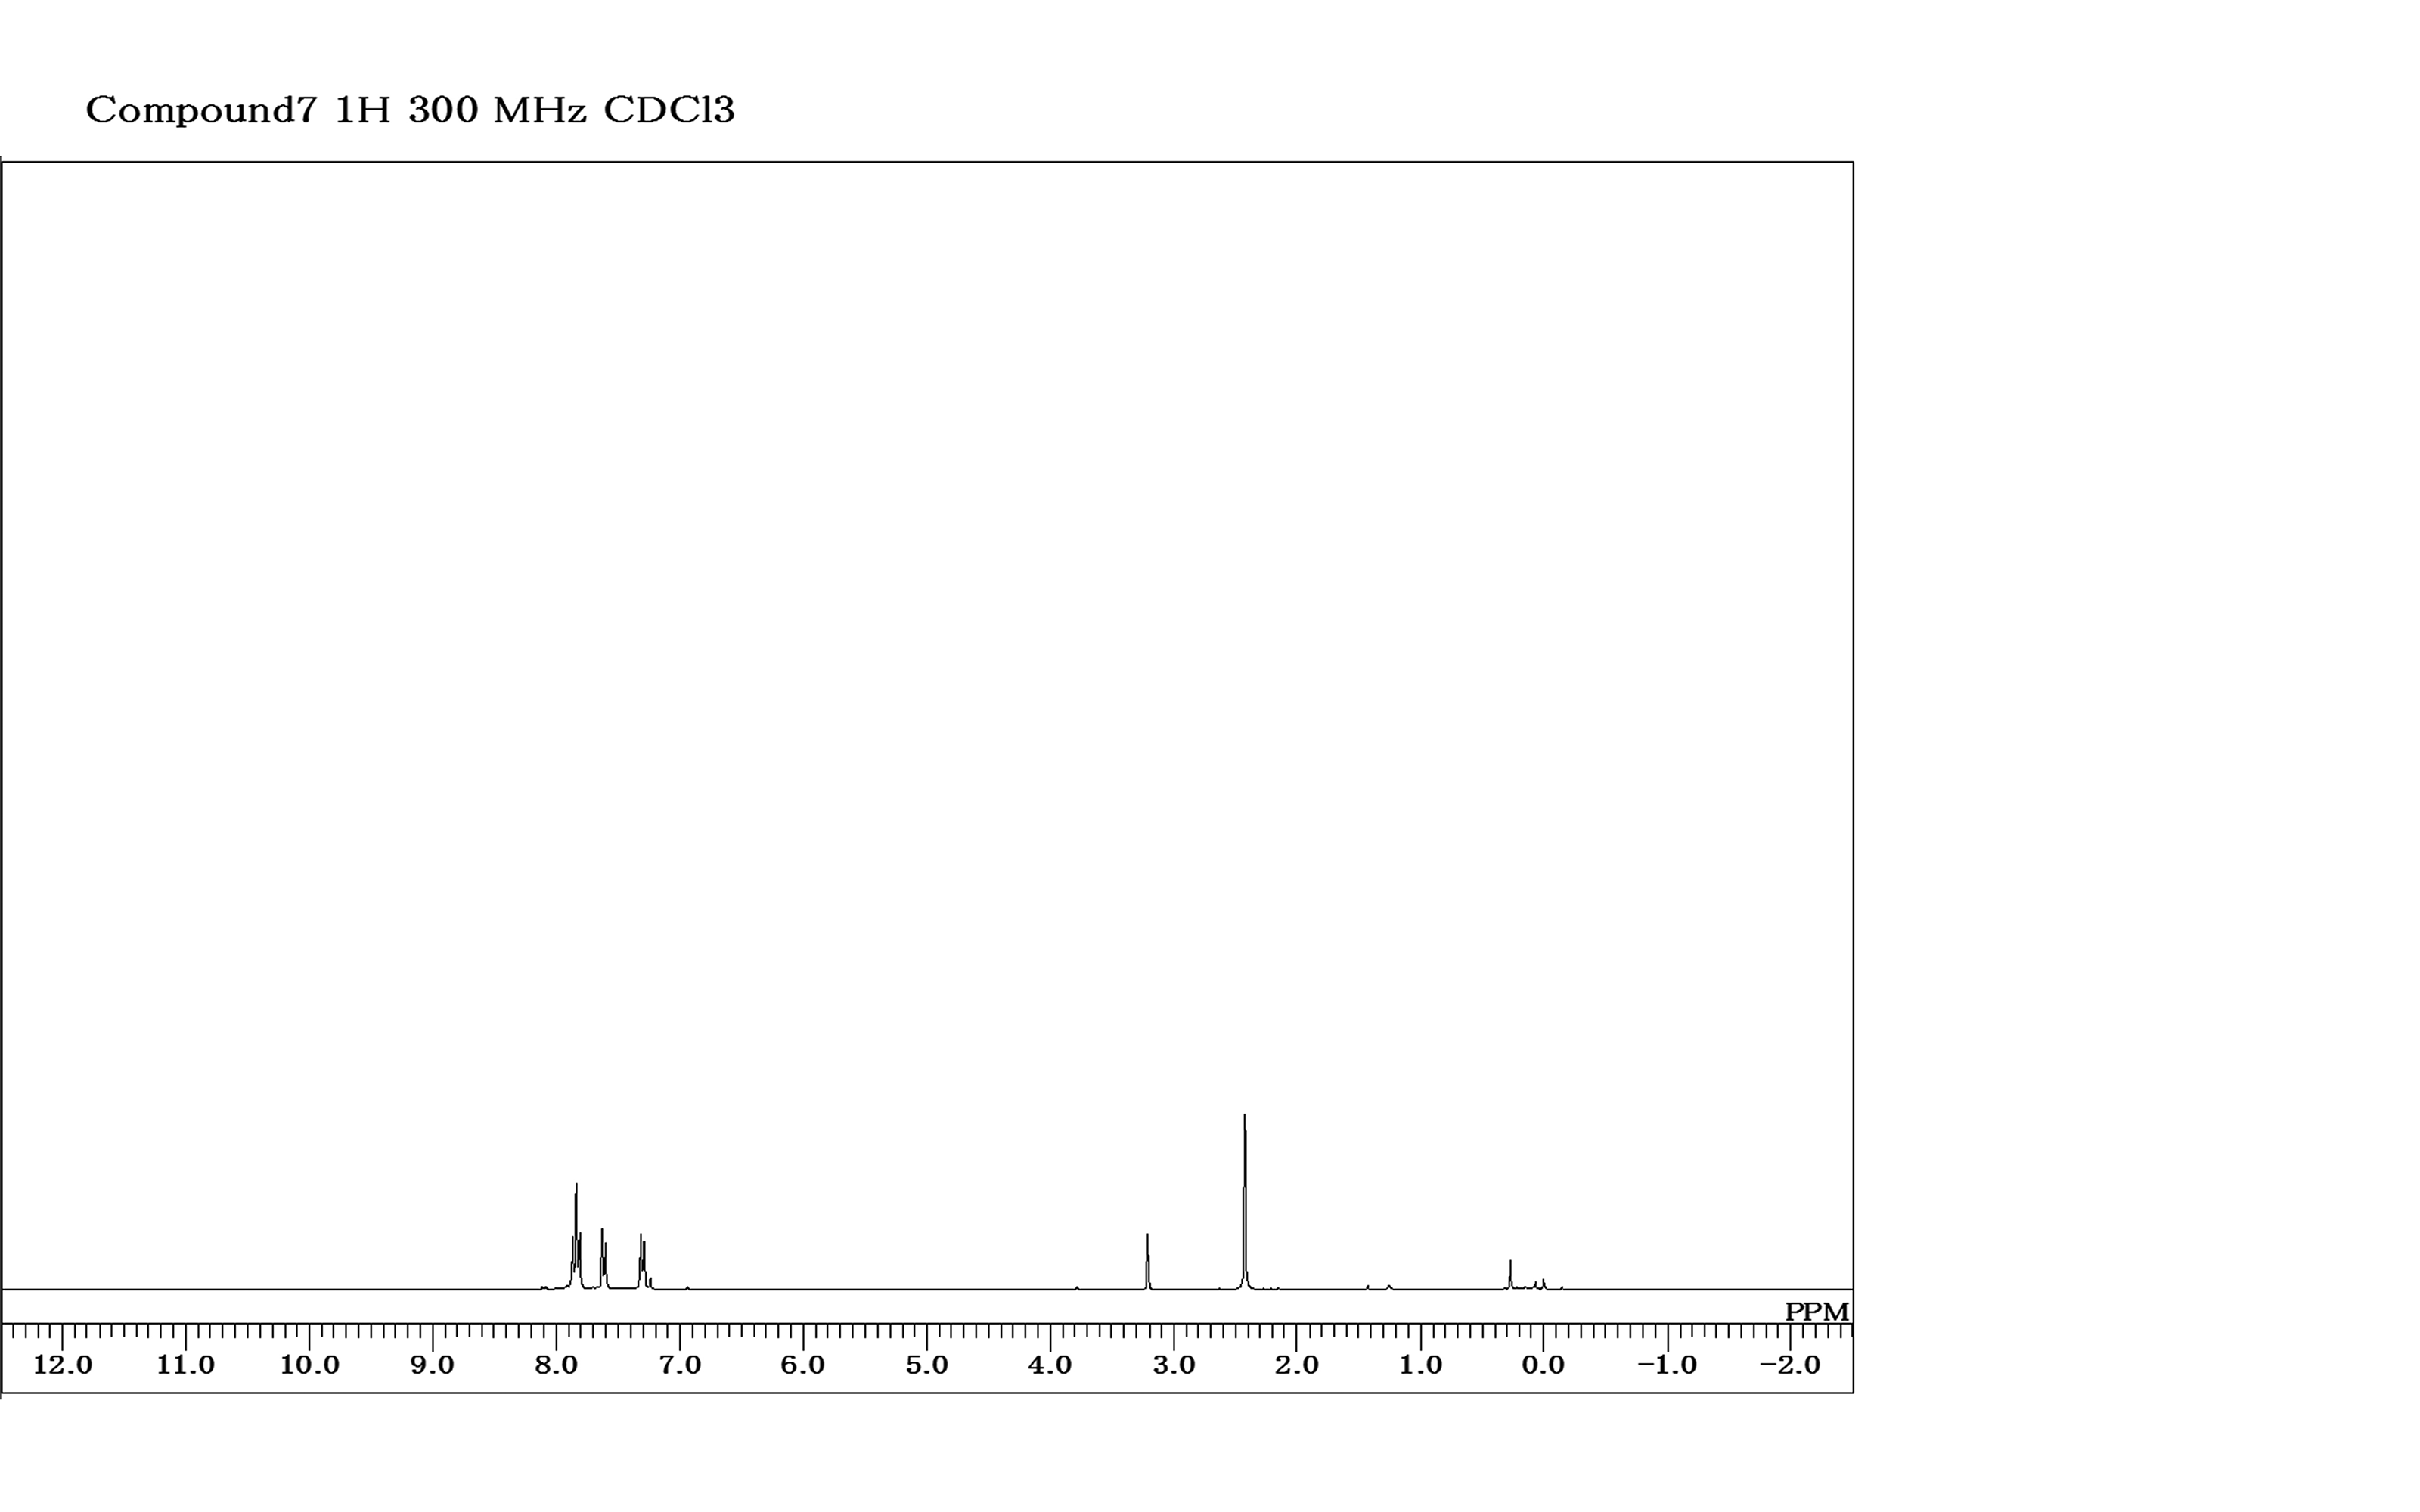


**Figure S7.** 1H-NMR spectrum of compound 7.


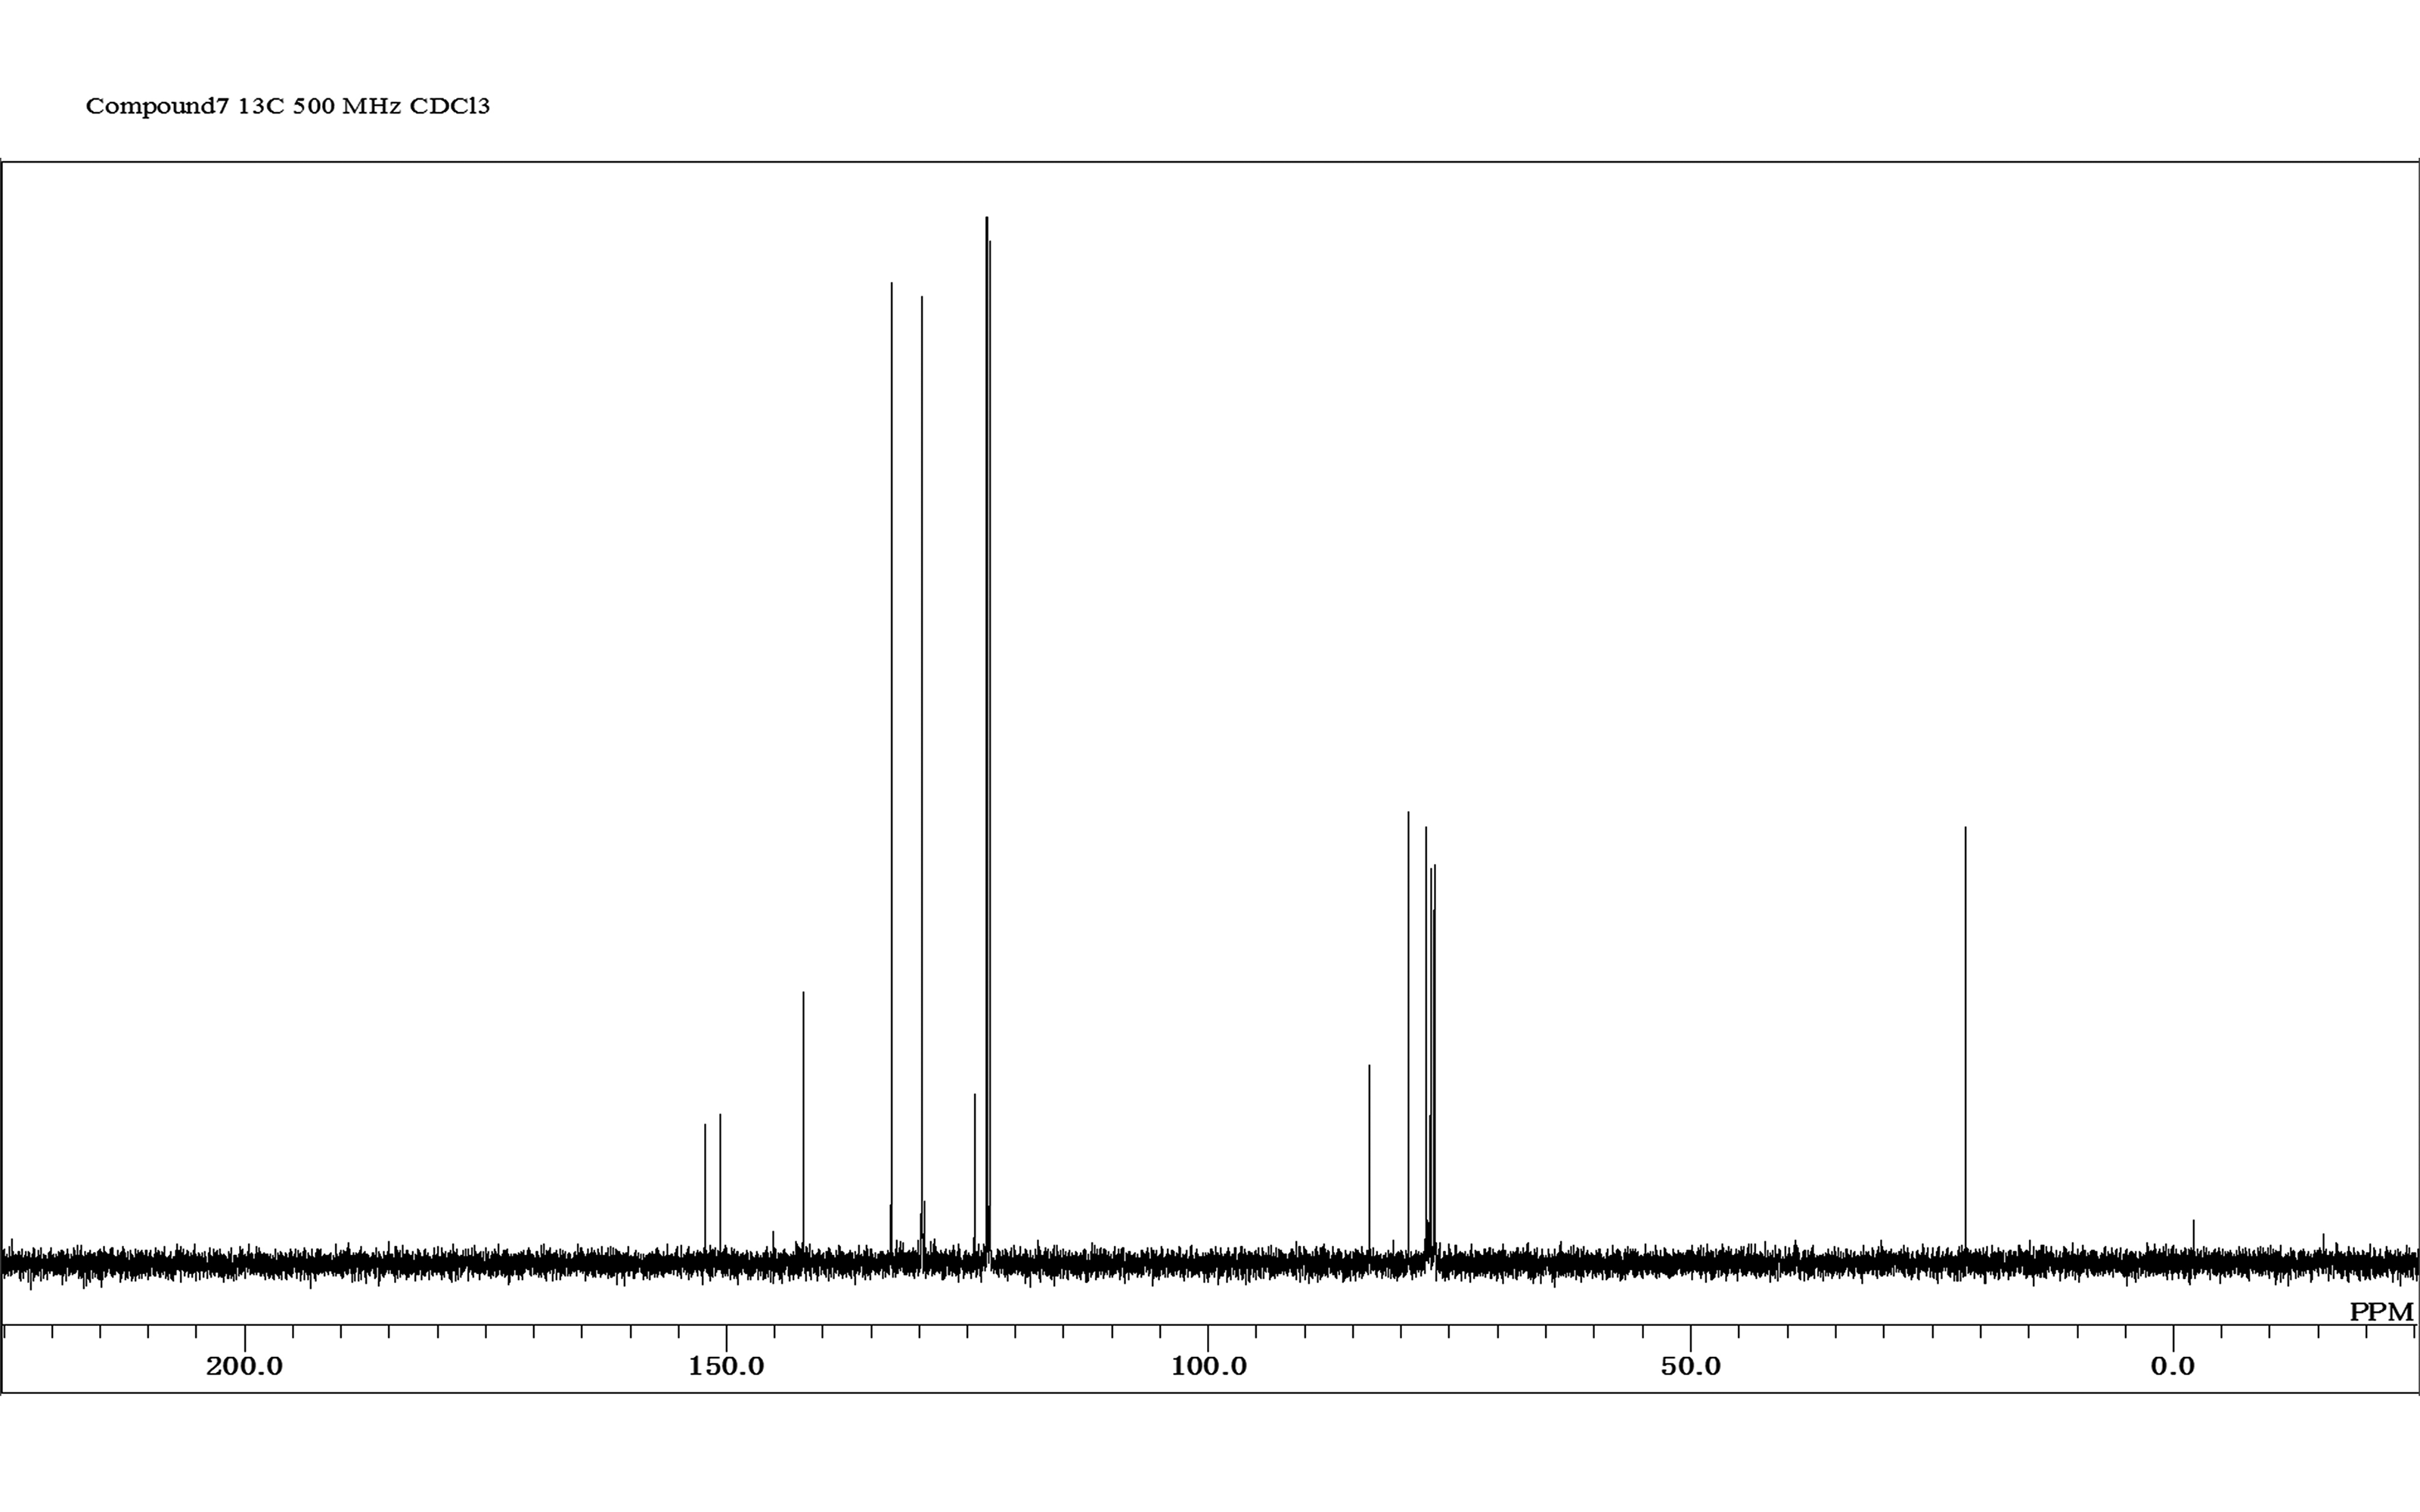


**Figure S8.** 13C-NMR spectrum of compound 7.


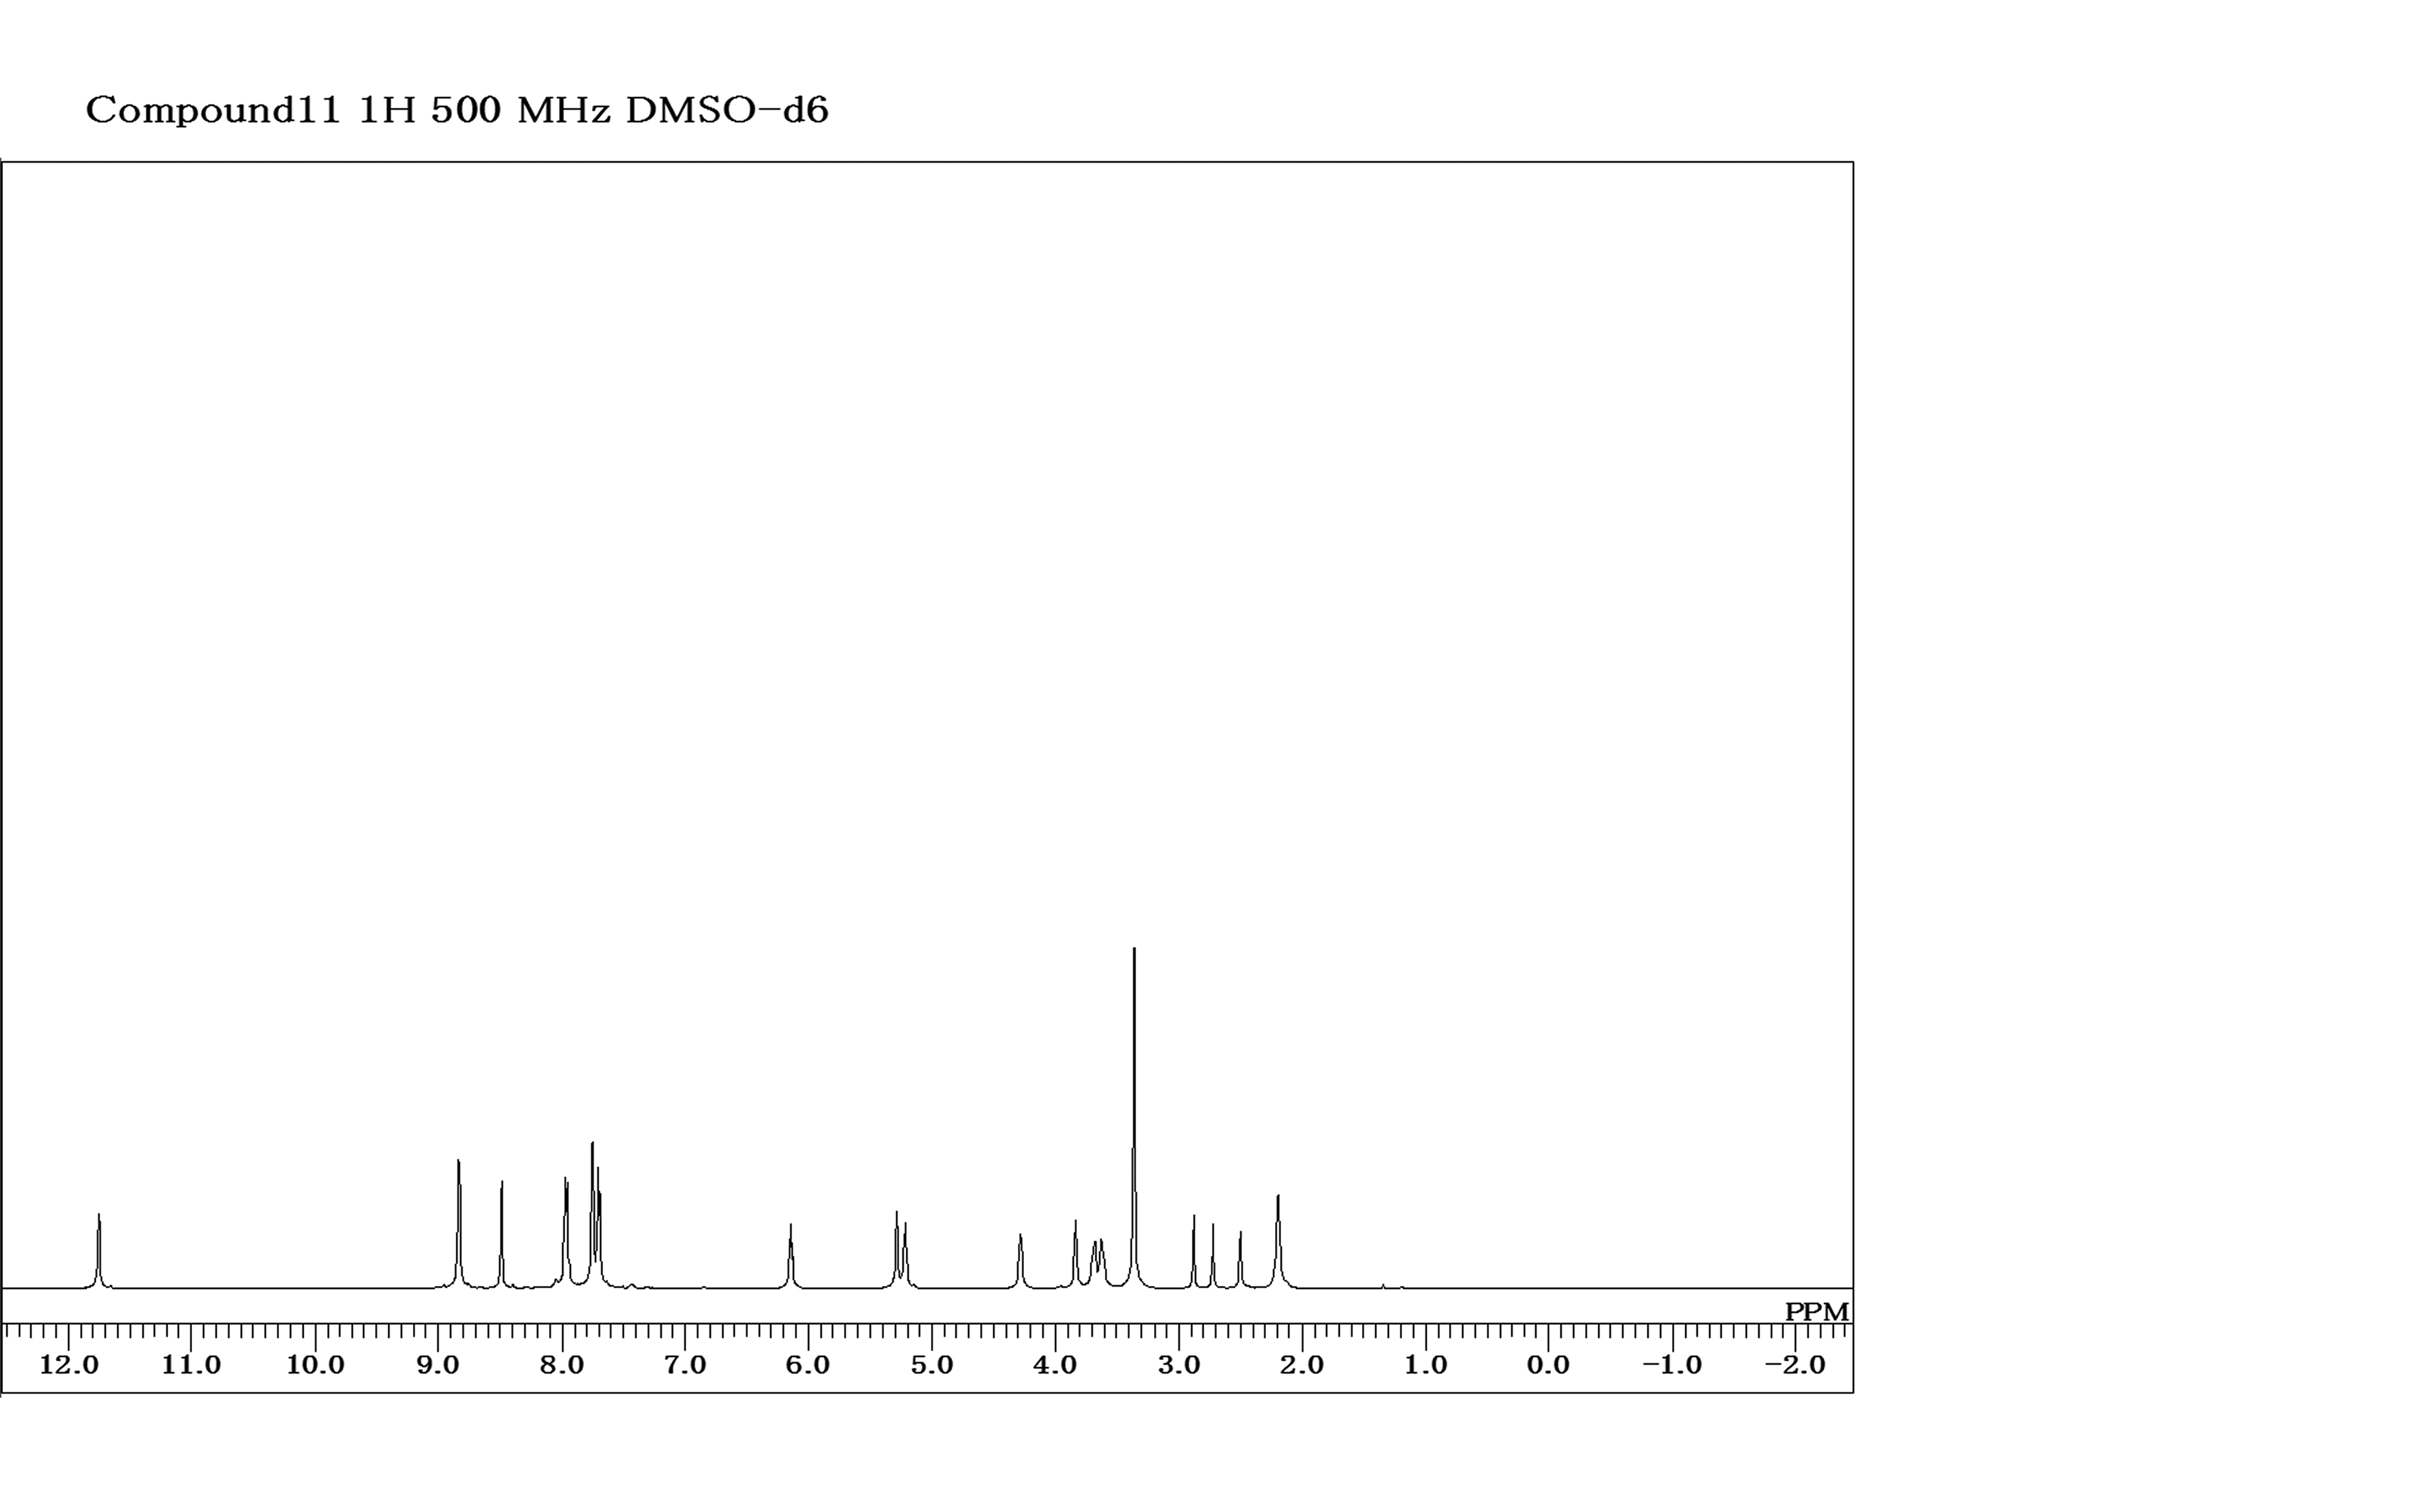


**Figure S9.** 1H-NMR spectrum of compound 11.


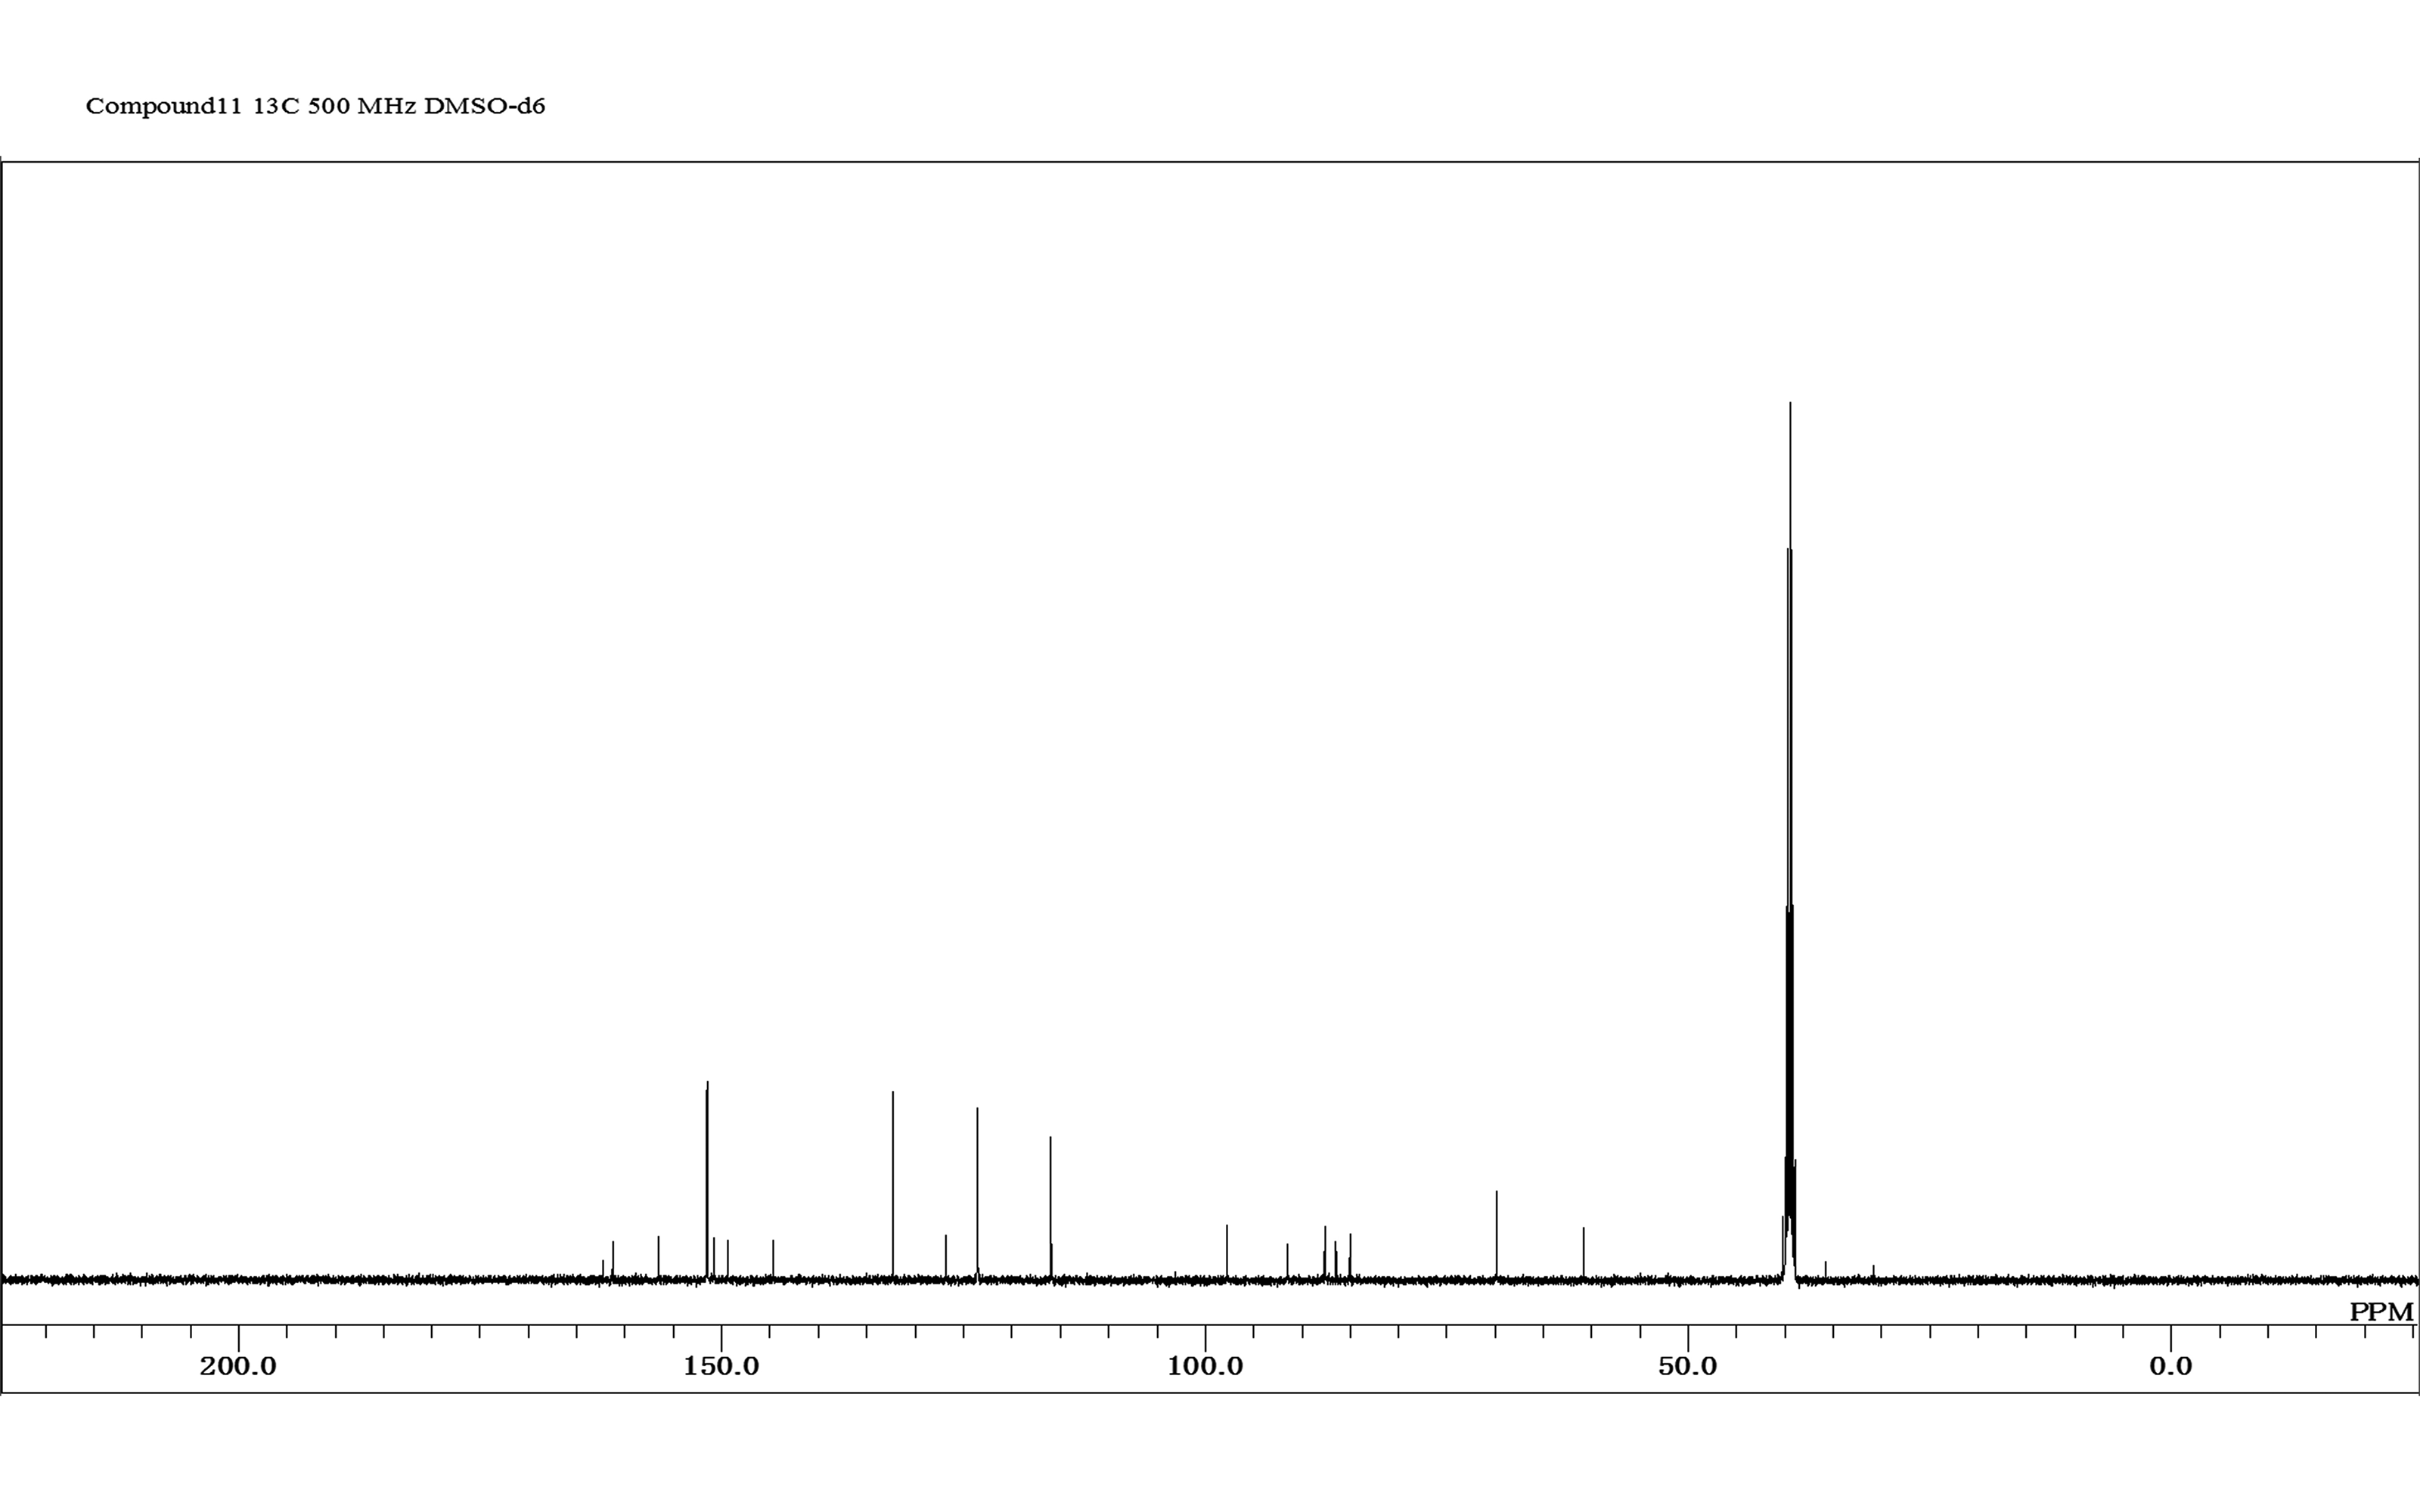


**Figure S10.** 13C-NMR spectrum of compound 11.


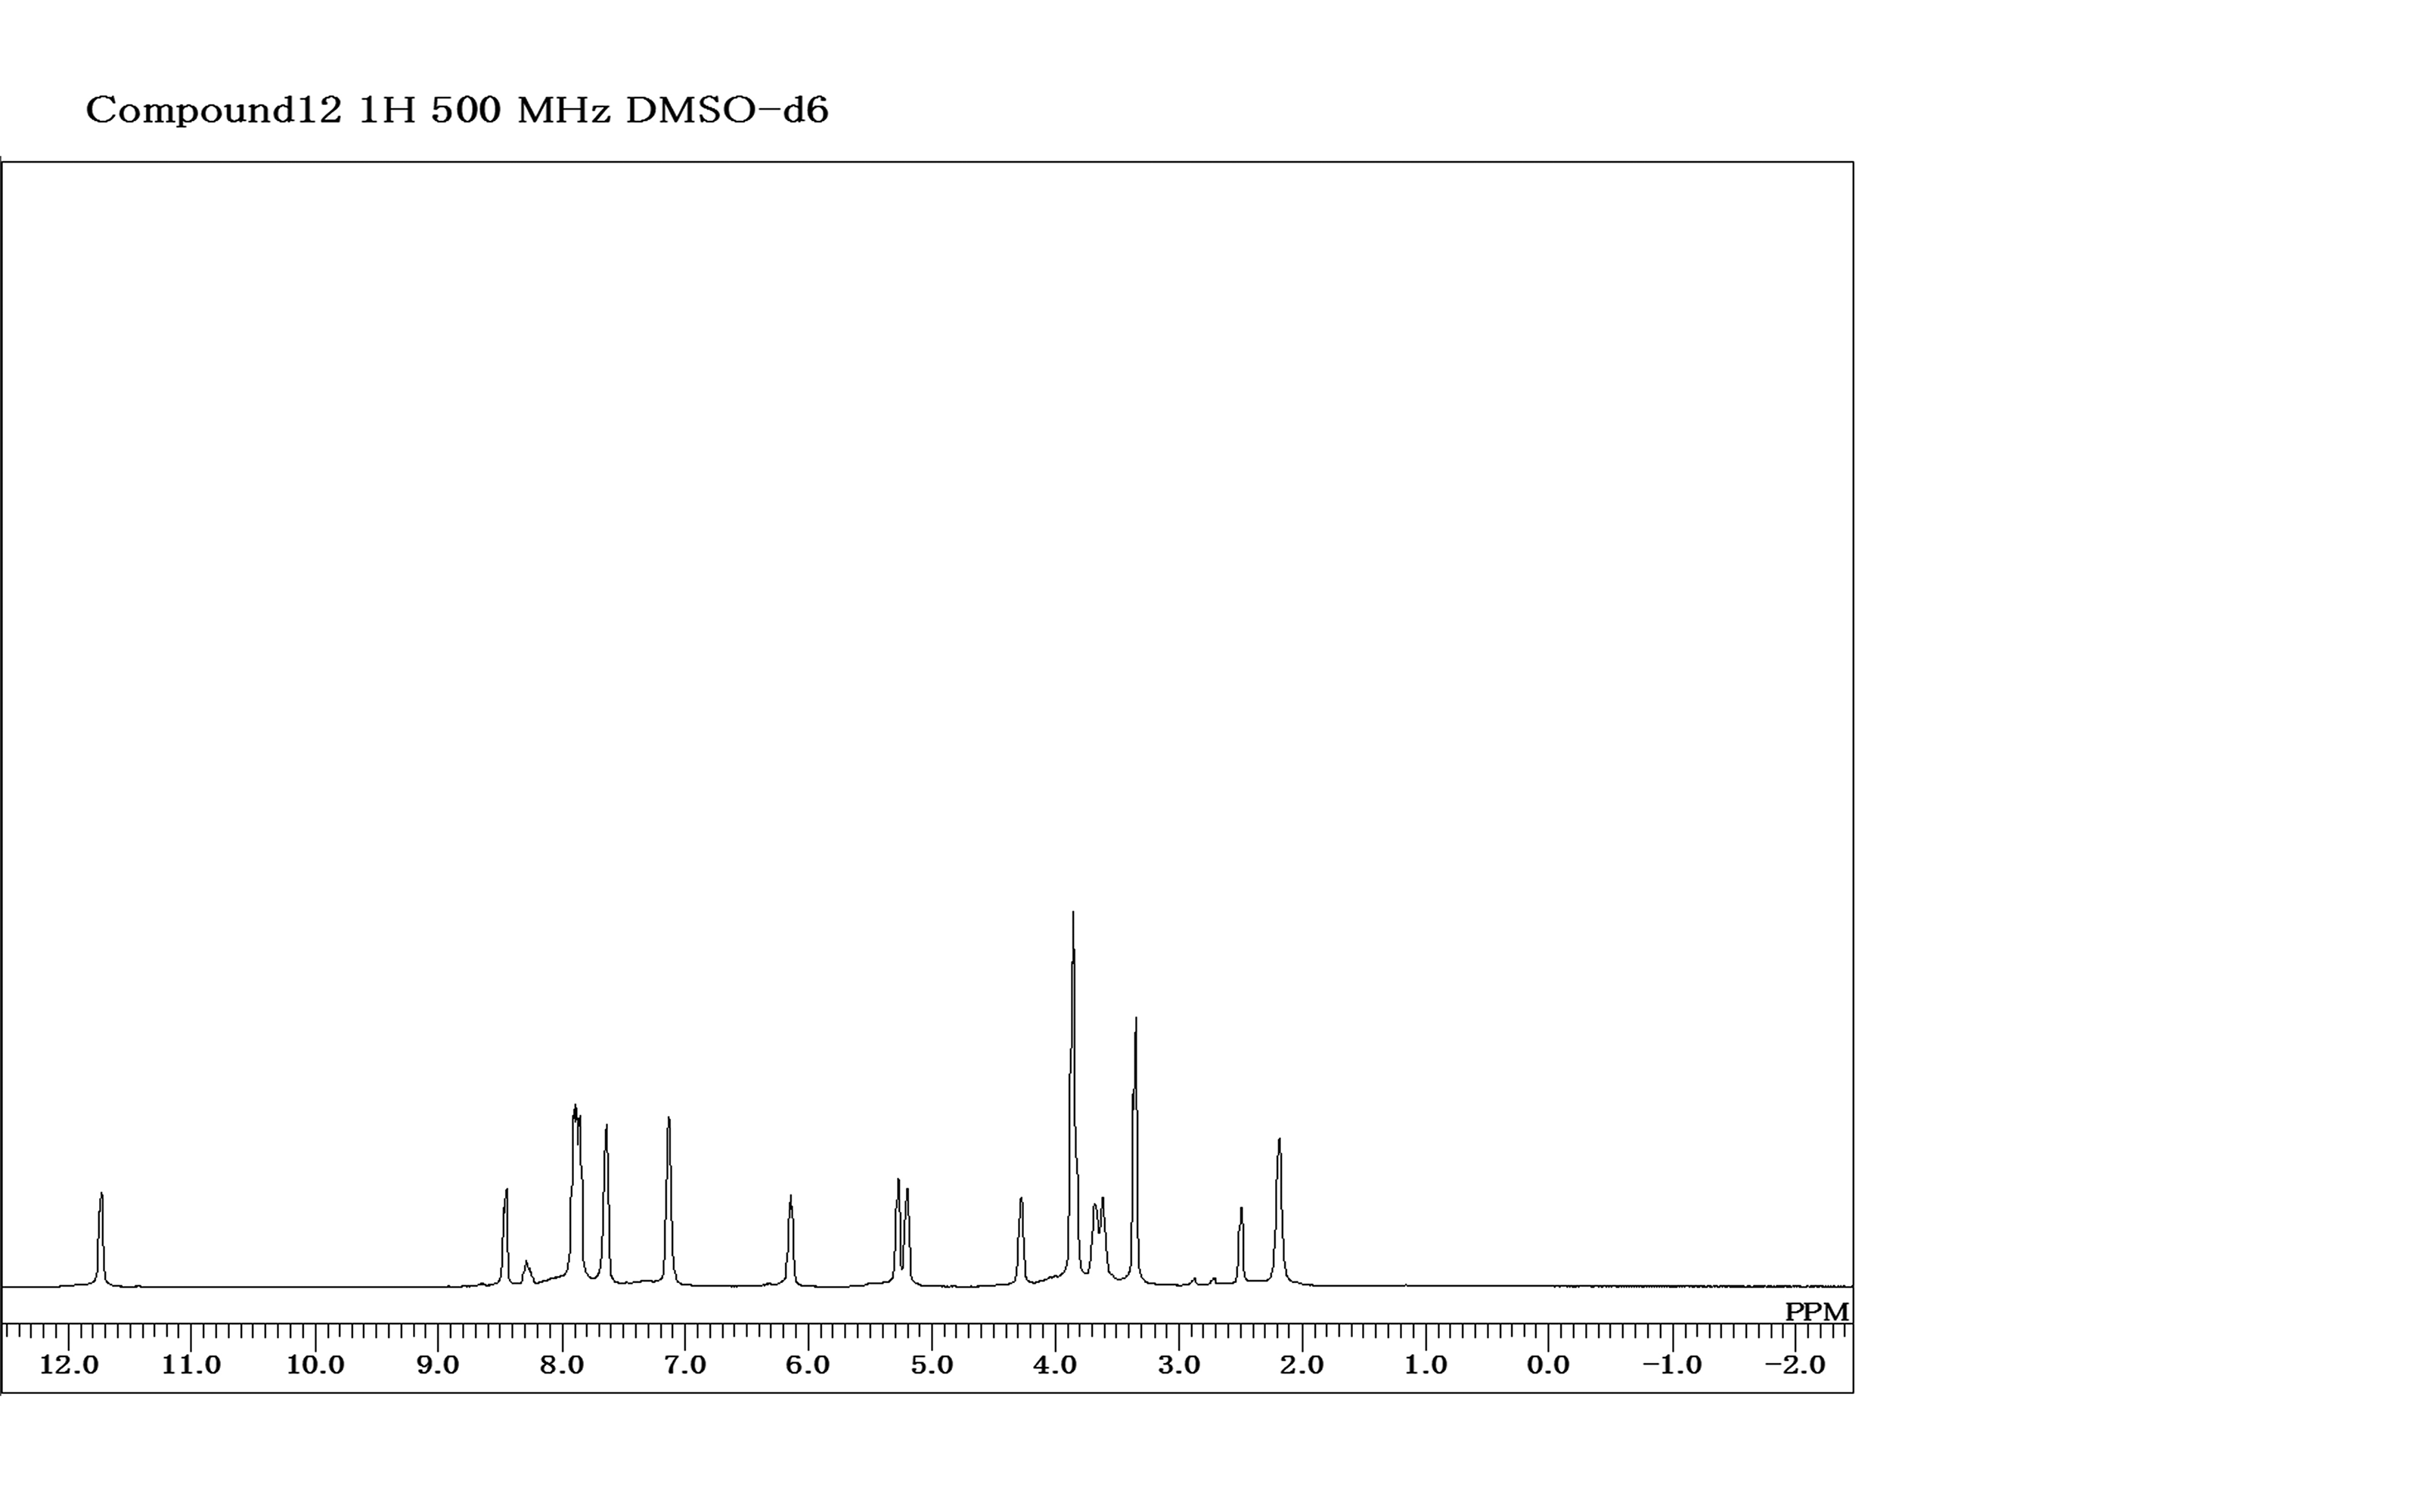


**Figure S11.** 1H-NMR spectrum of compound 12.


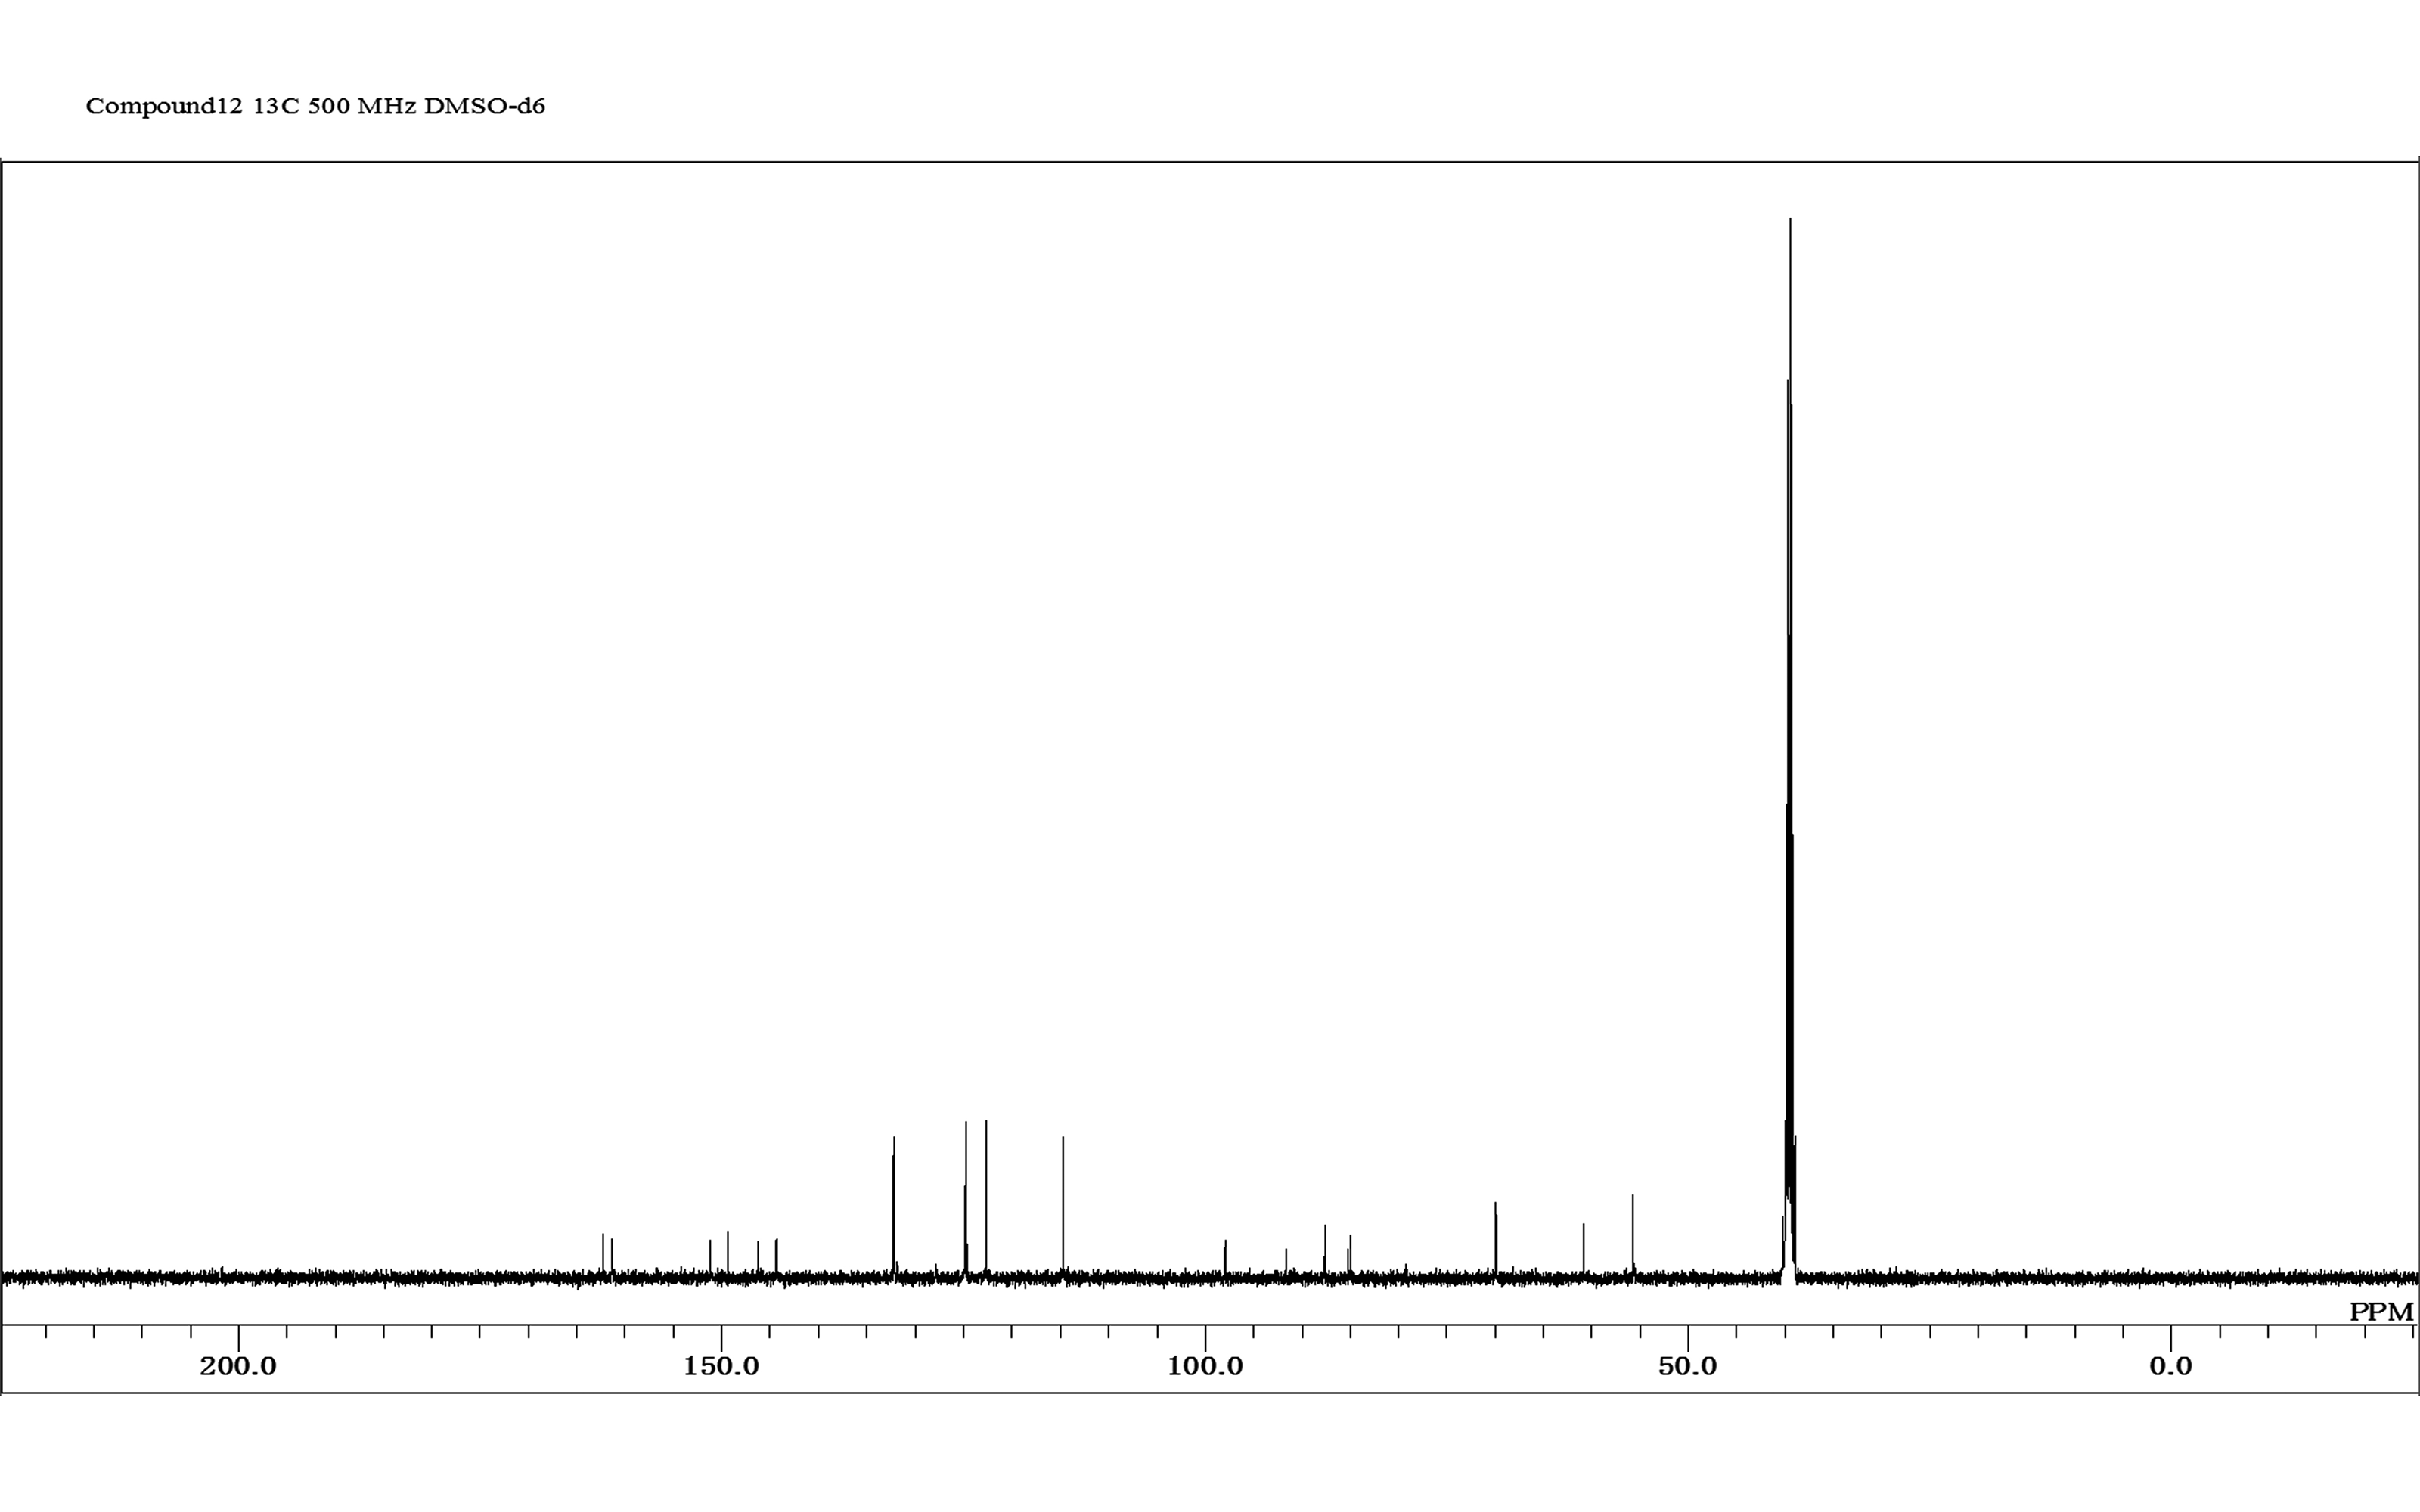


**Figure S12.** 13C-NMR spectrum of compound 12.


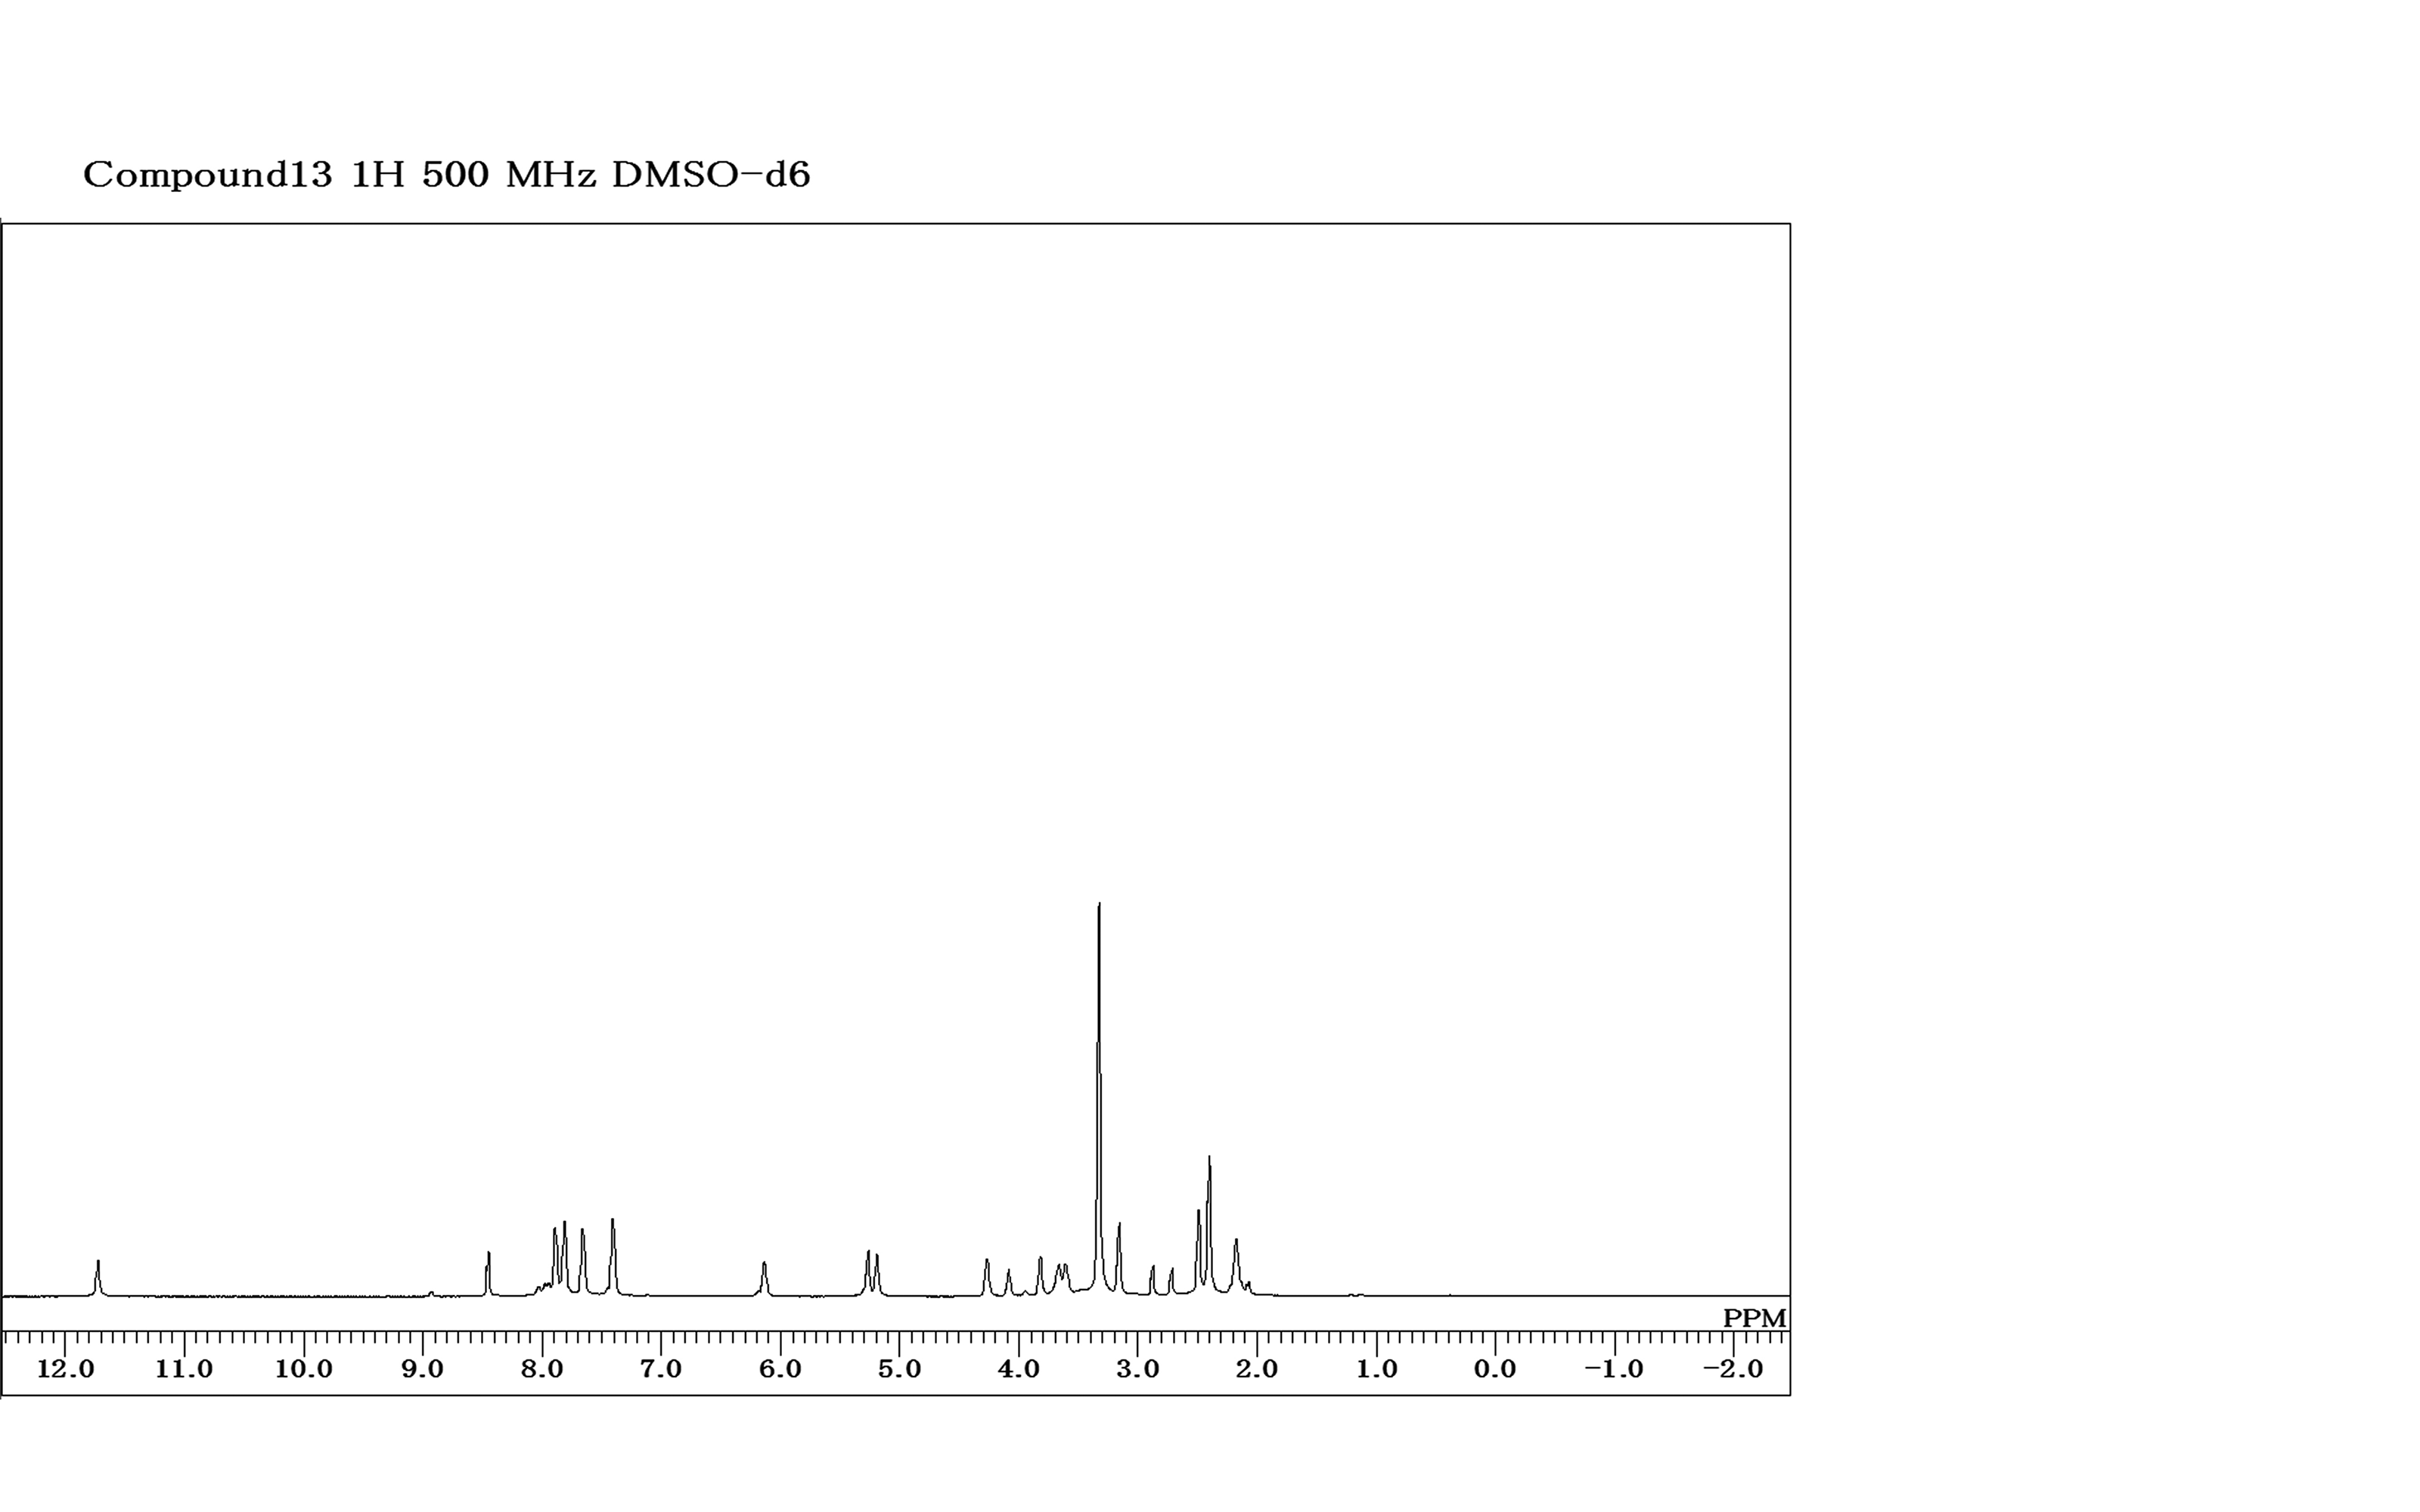


**Figure S13.** 1H-NMR spectrum of compound 13.


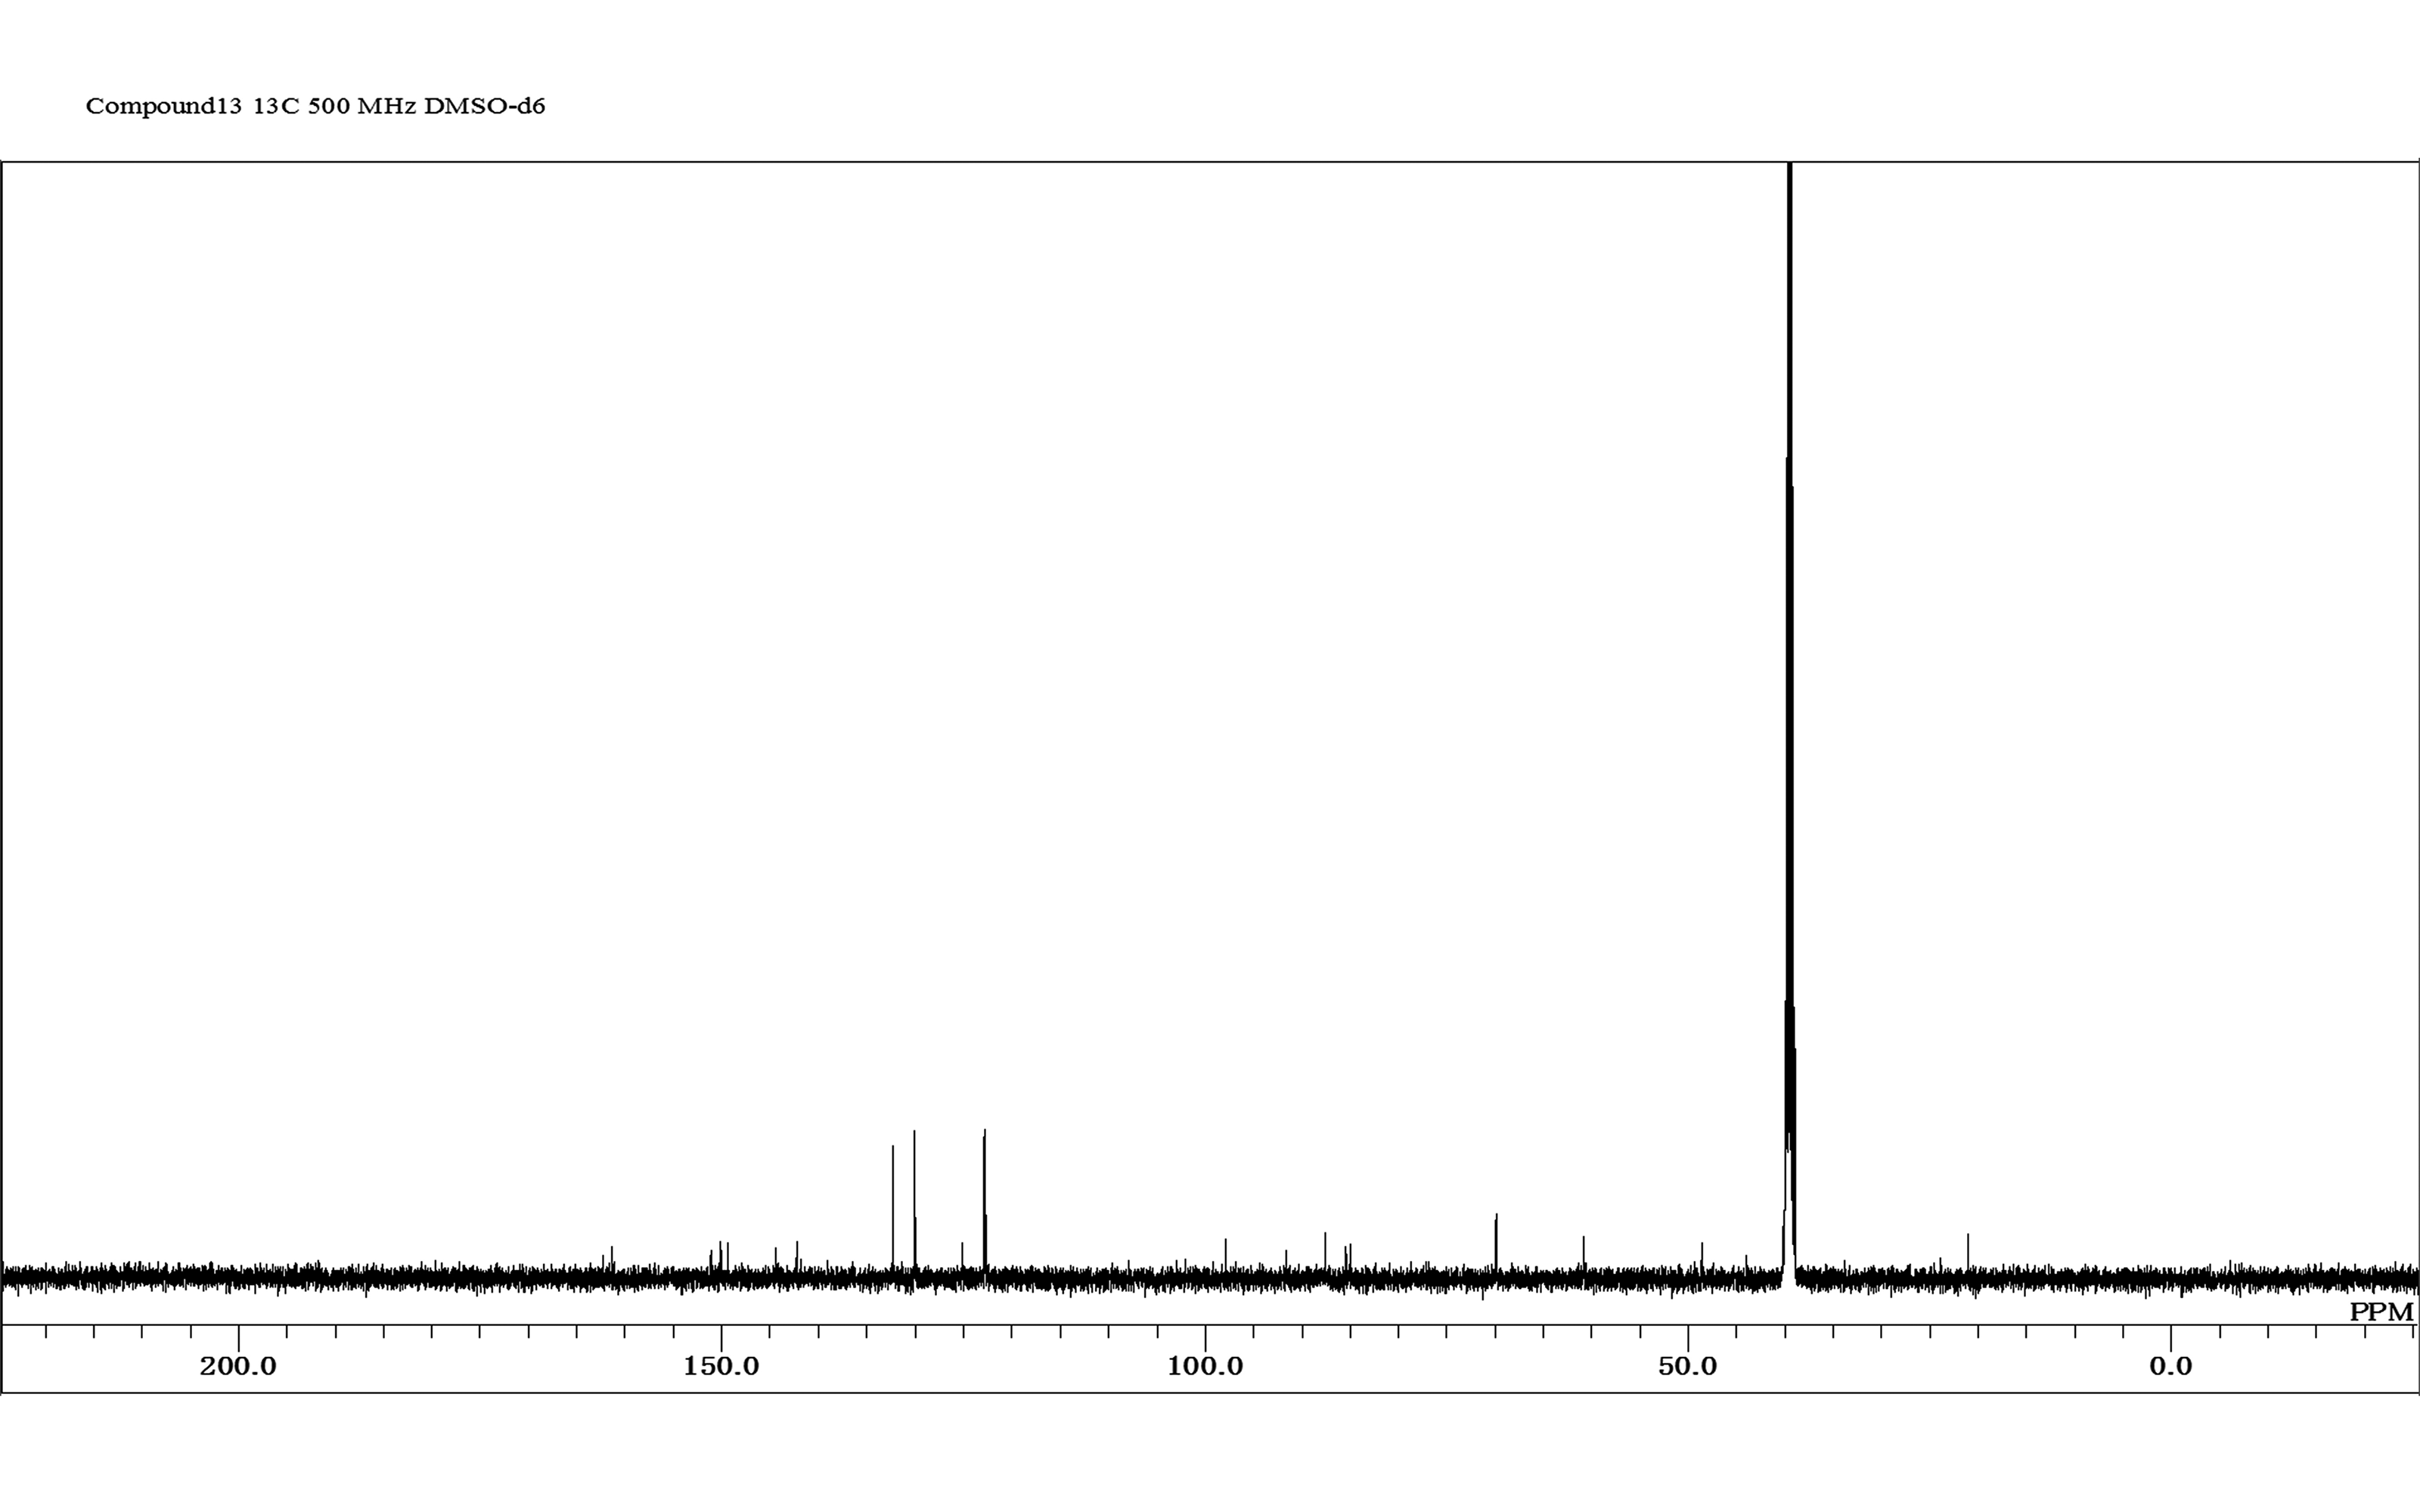


**Figure S14.** 13C-NMR spectrum of compound 13.


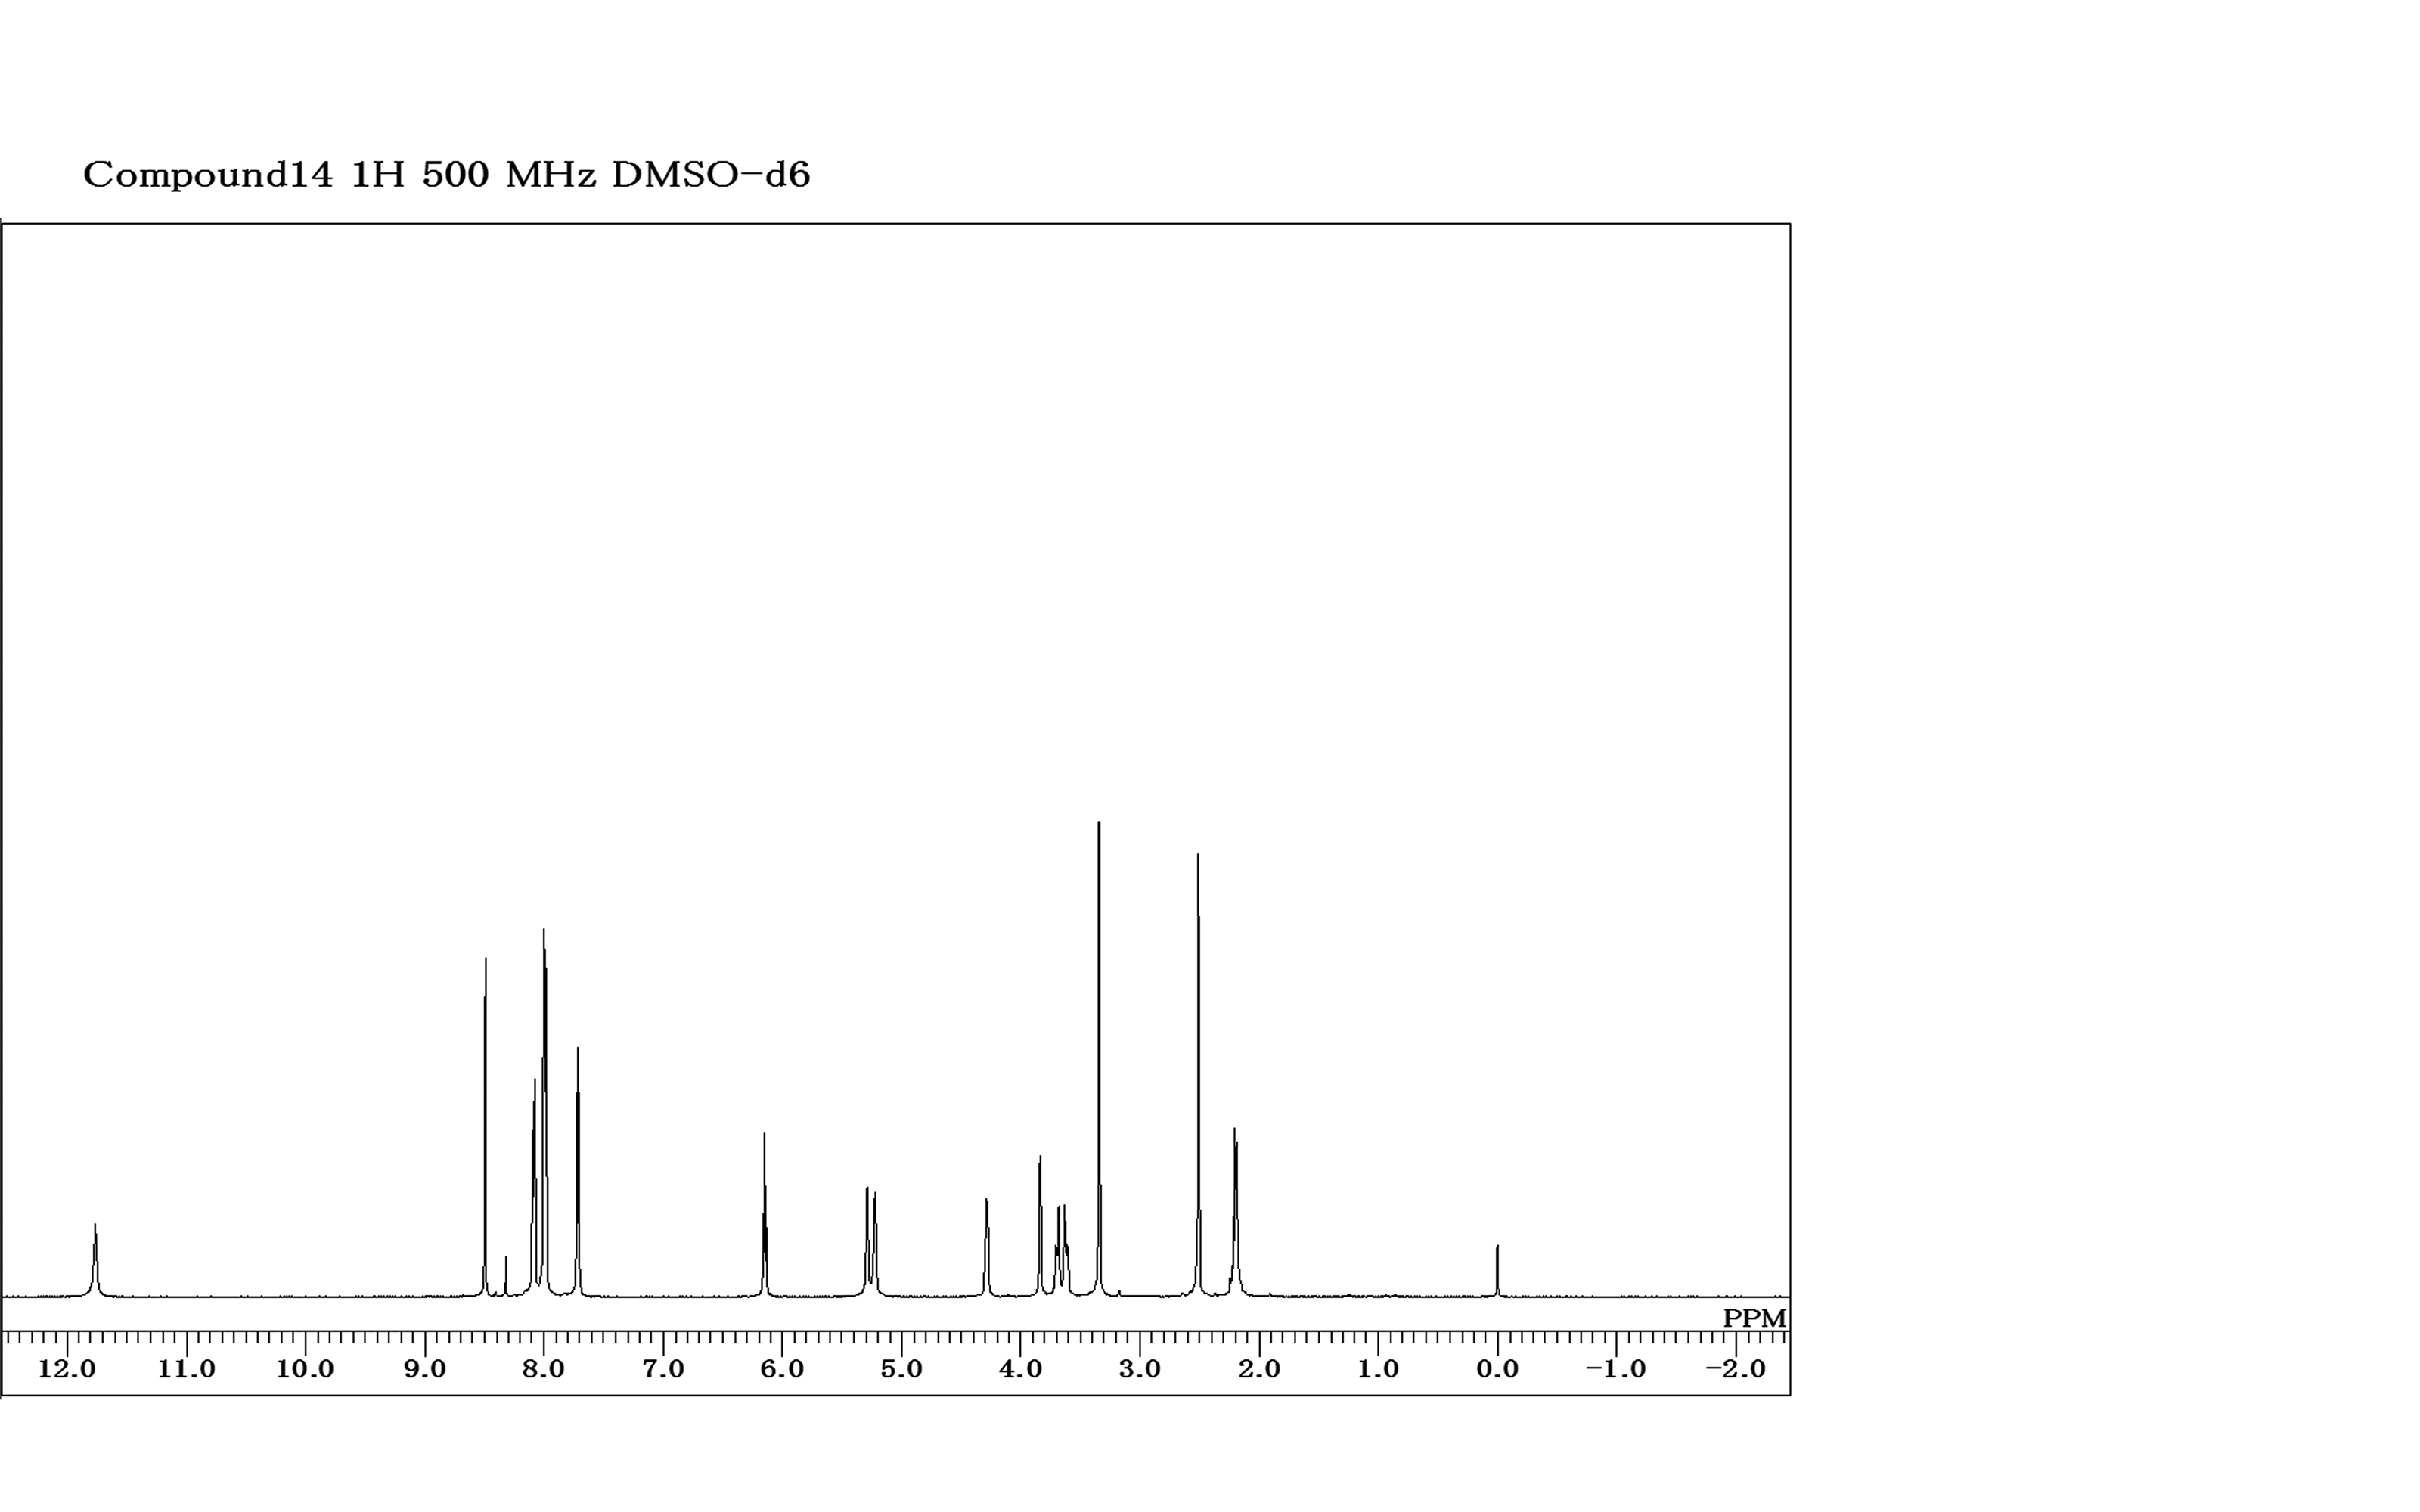


**Figure S15.** 1H-NMR spectrum of compound 14.


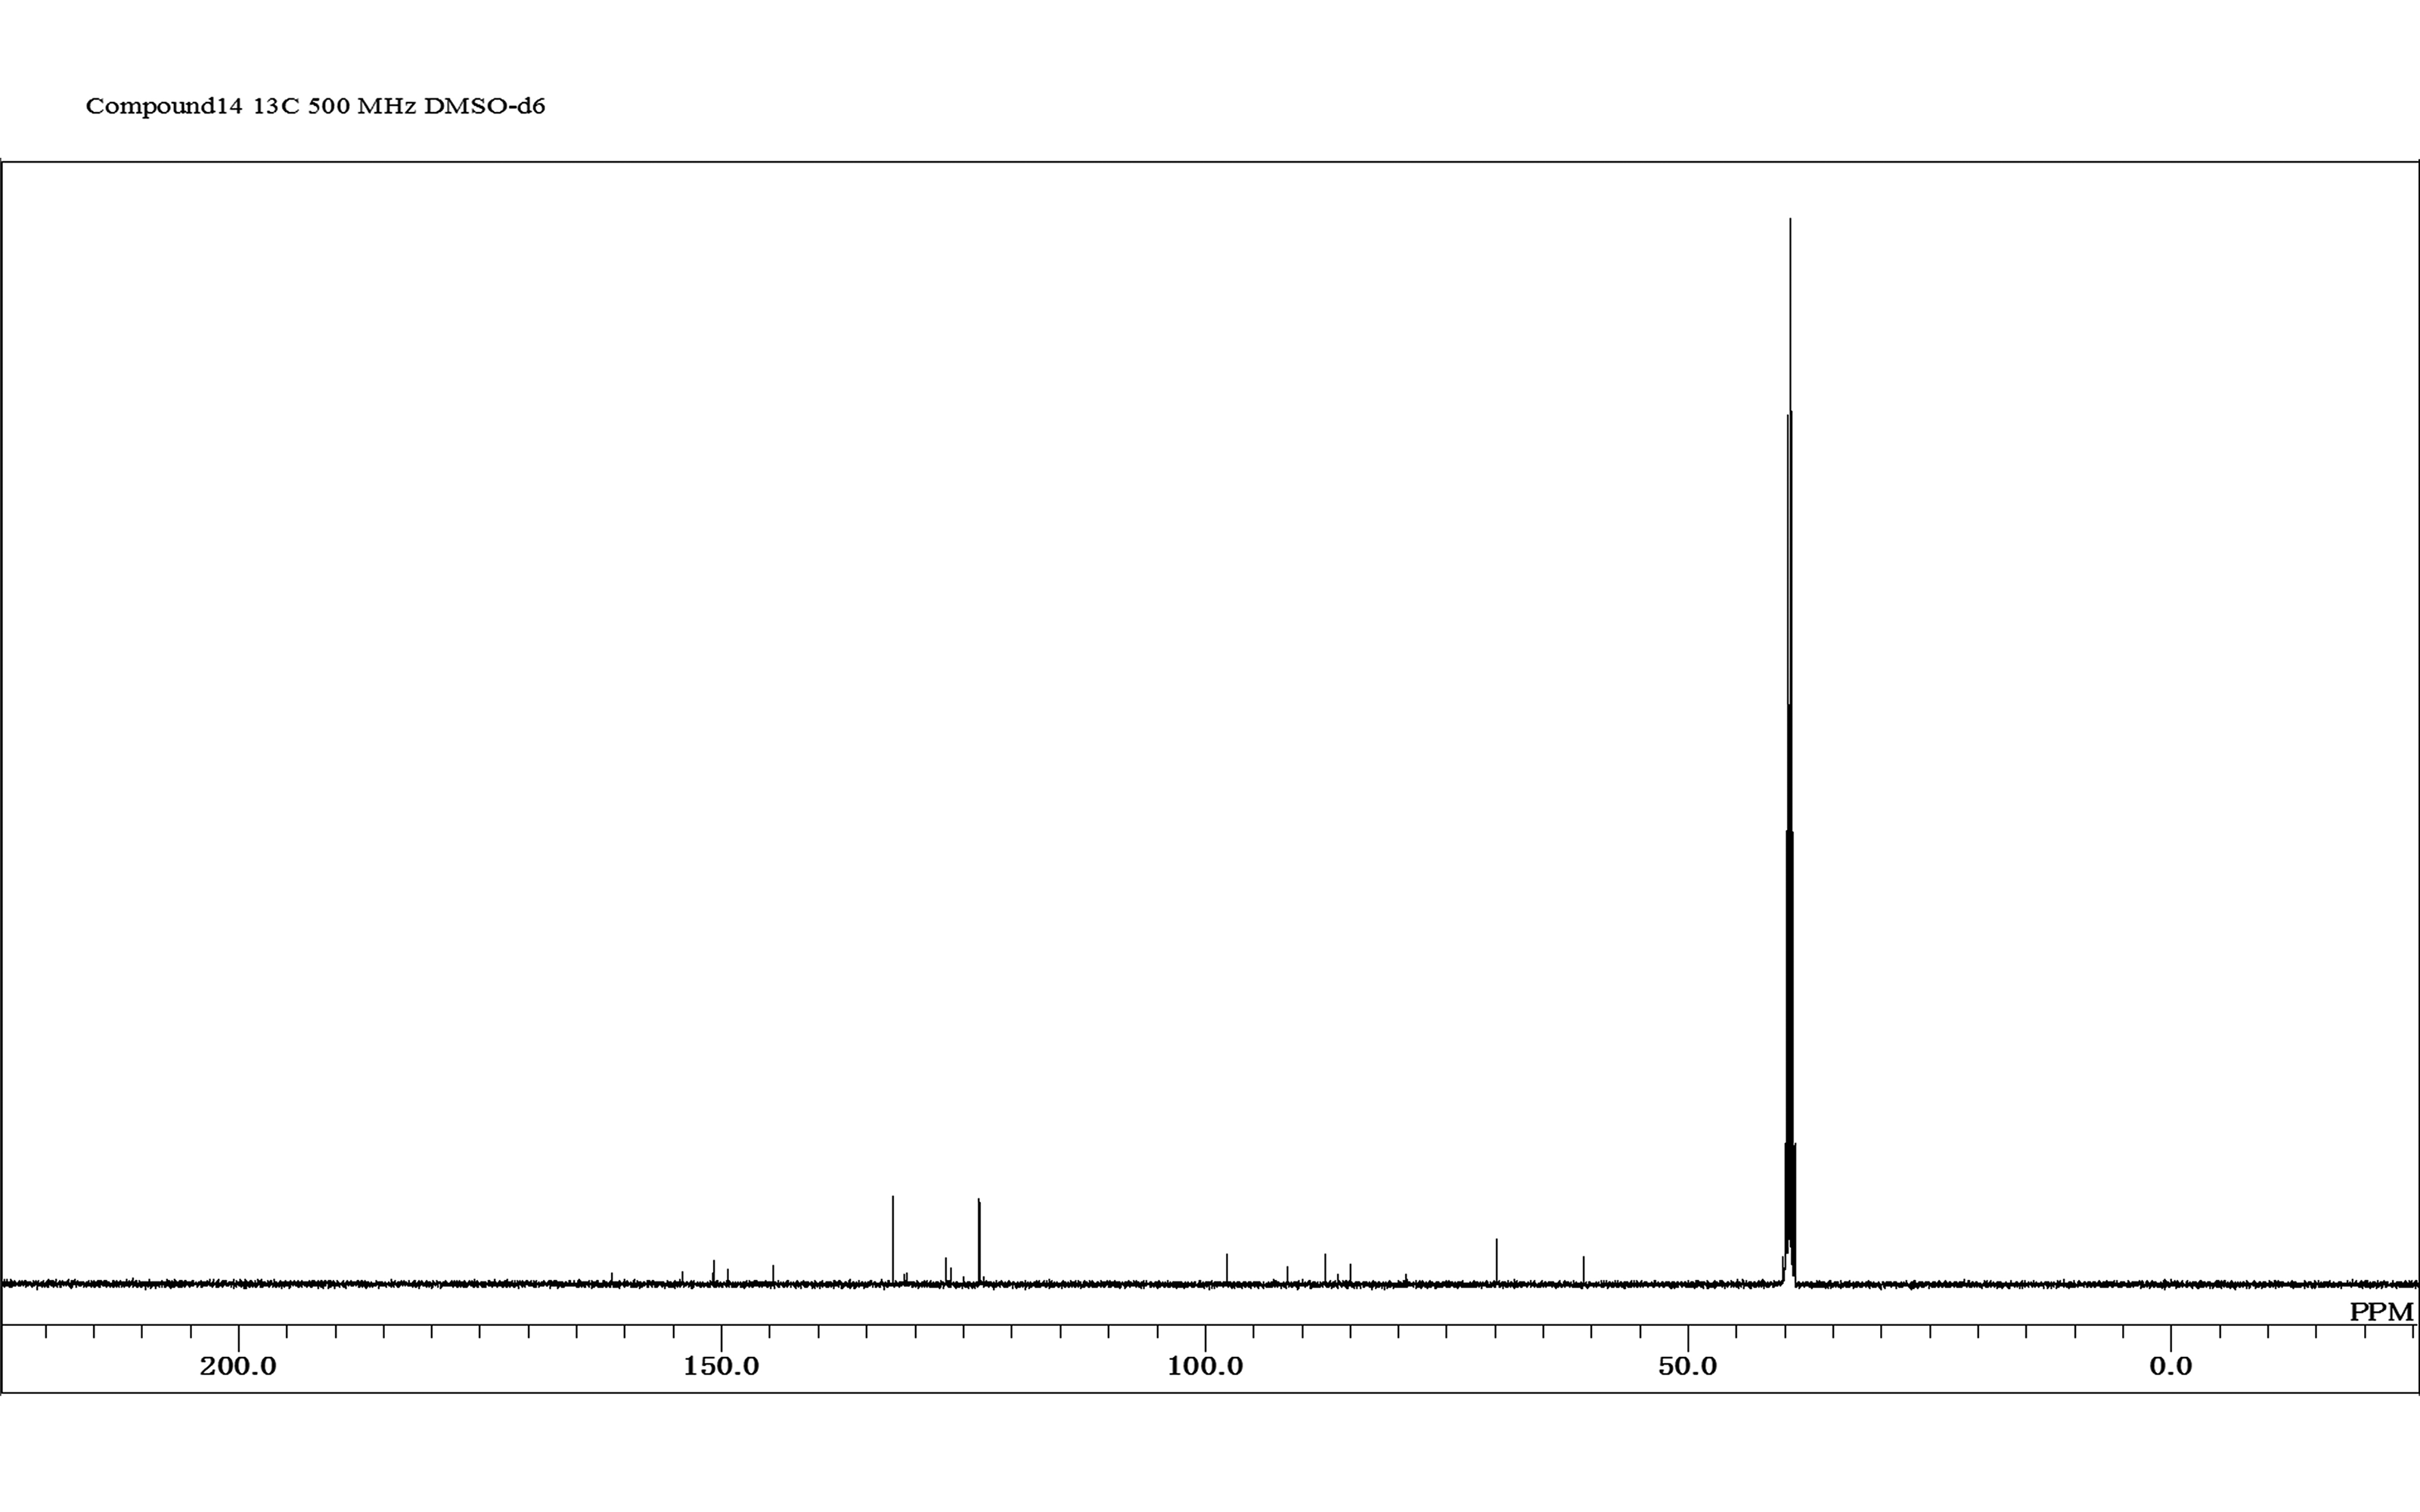


**Figure S16.** 13C-NMR spectrum of compound 14.


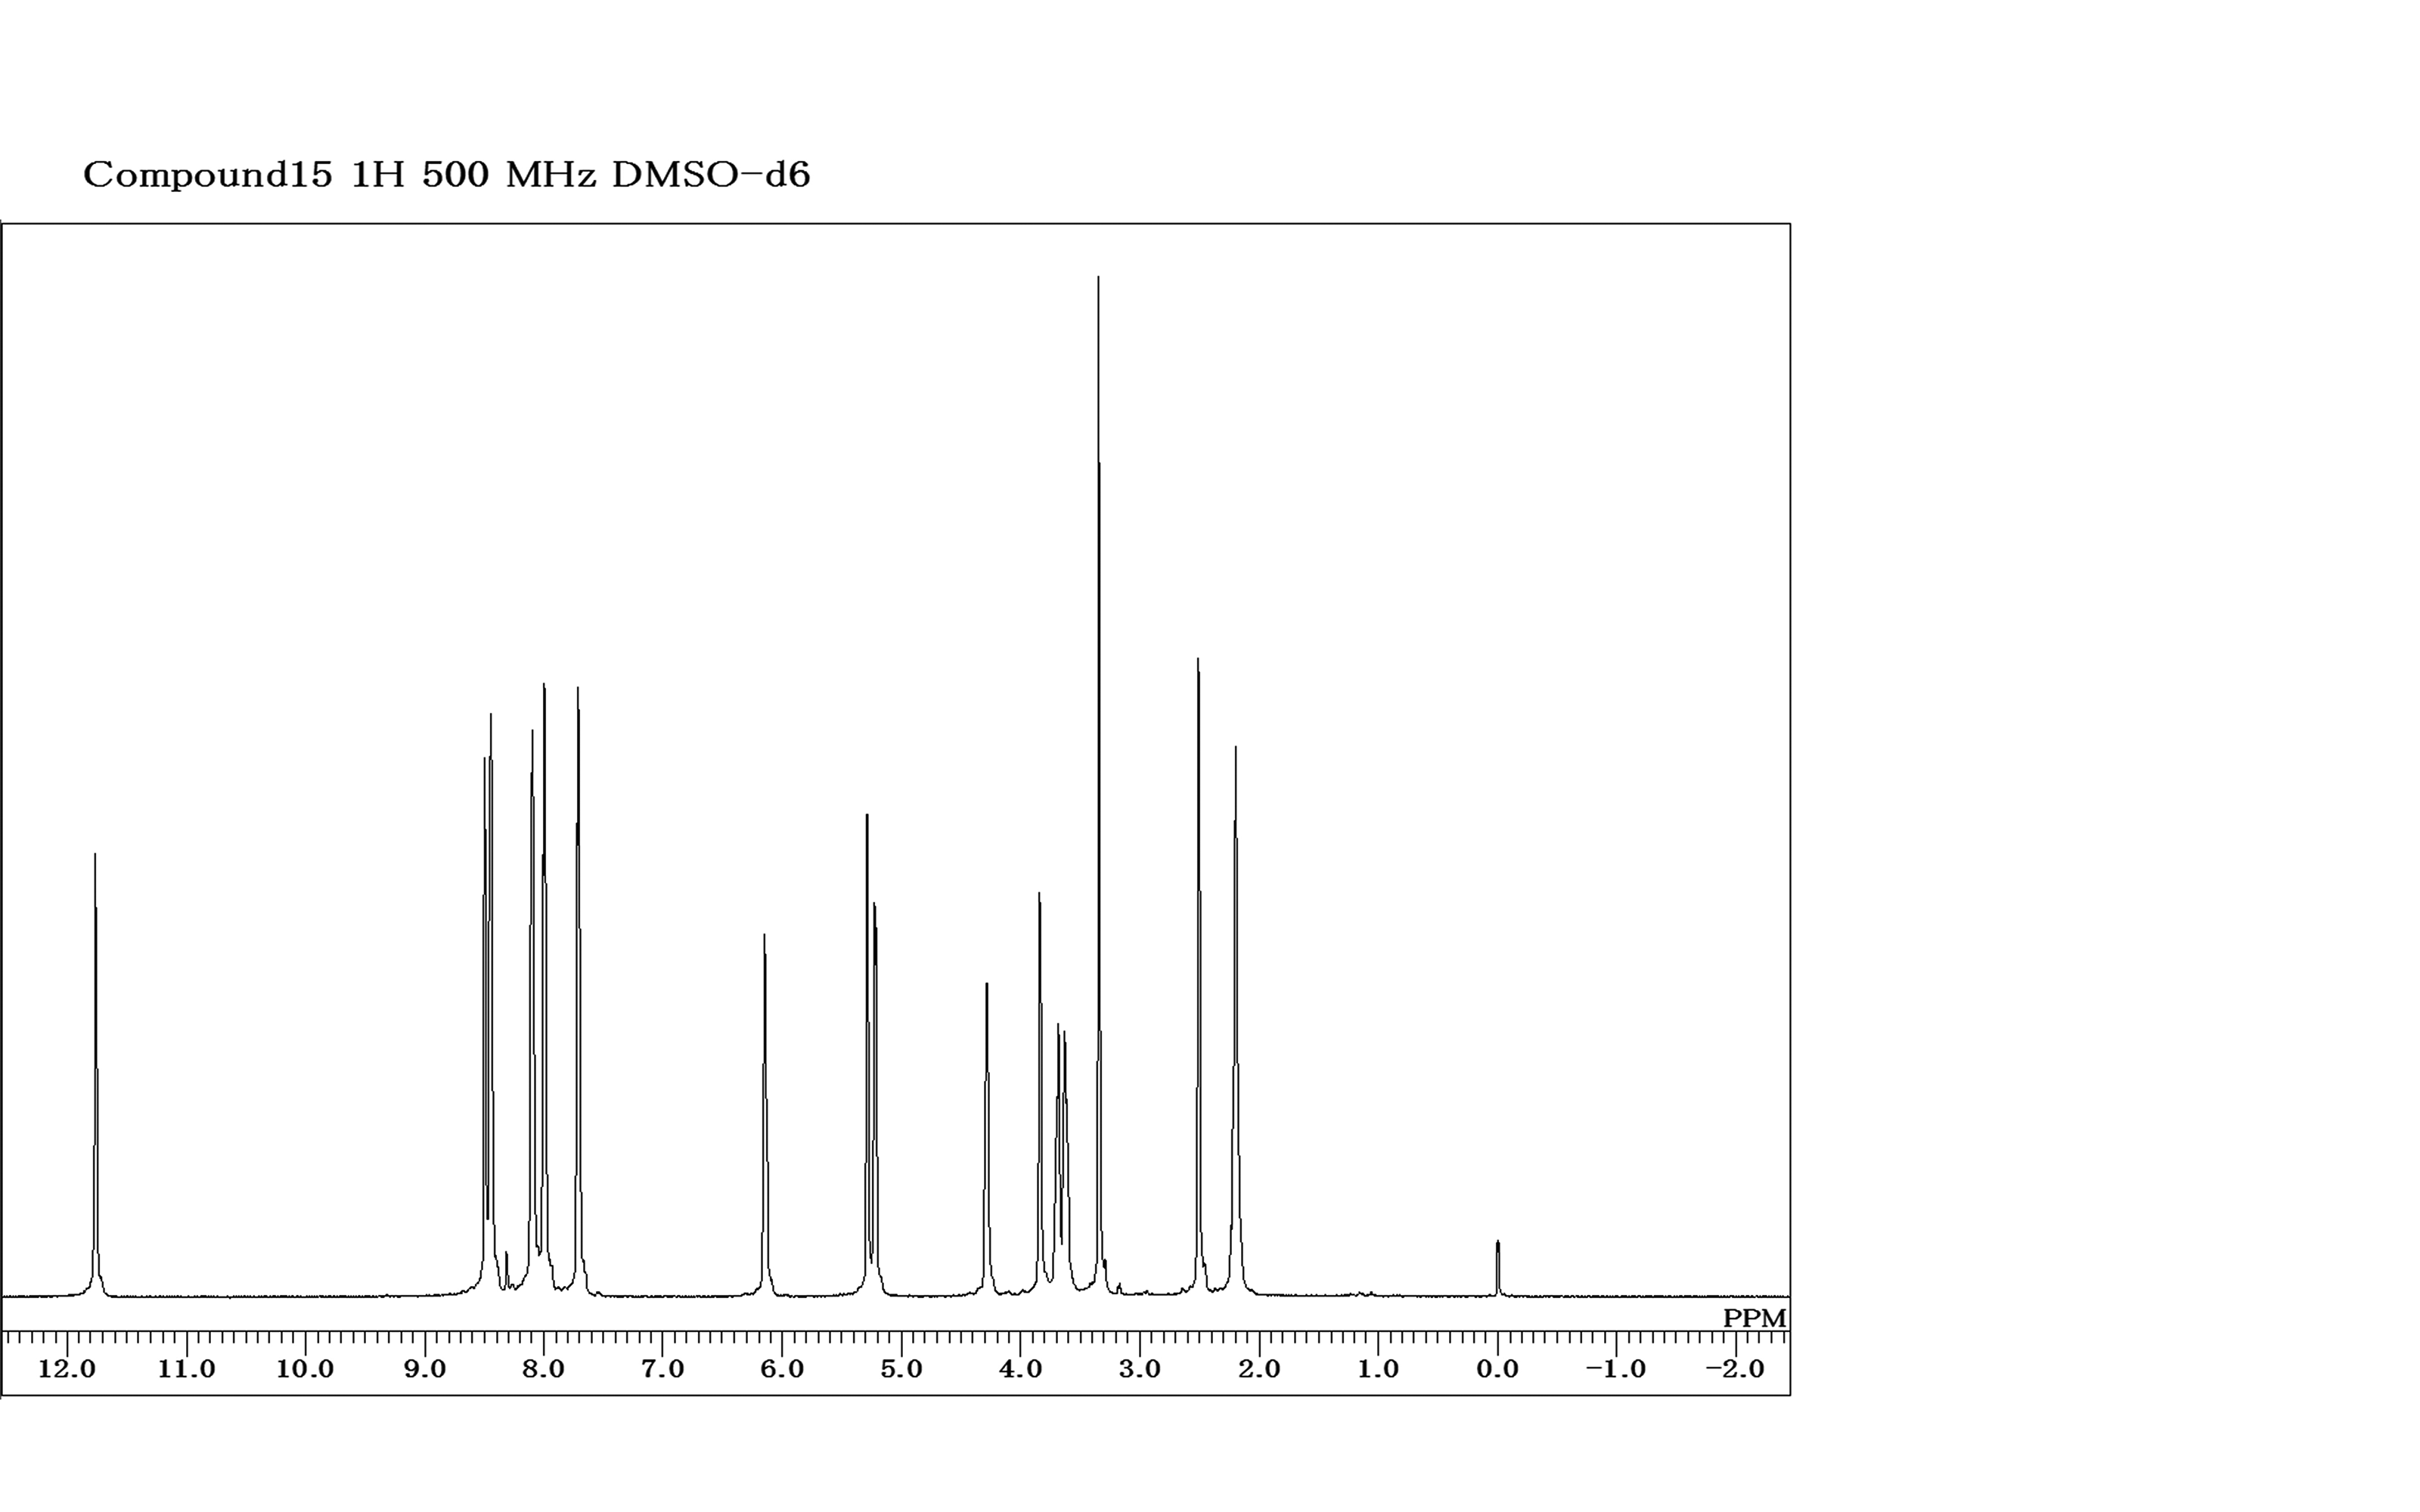


**Figure S17.** 1H-NMR spectrum of compound 15.

**
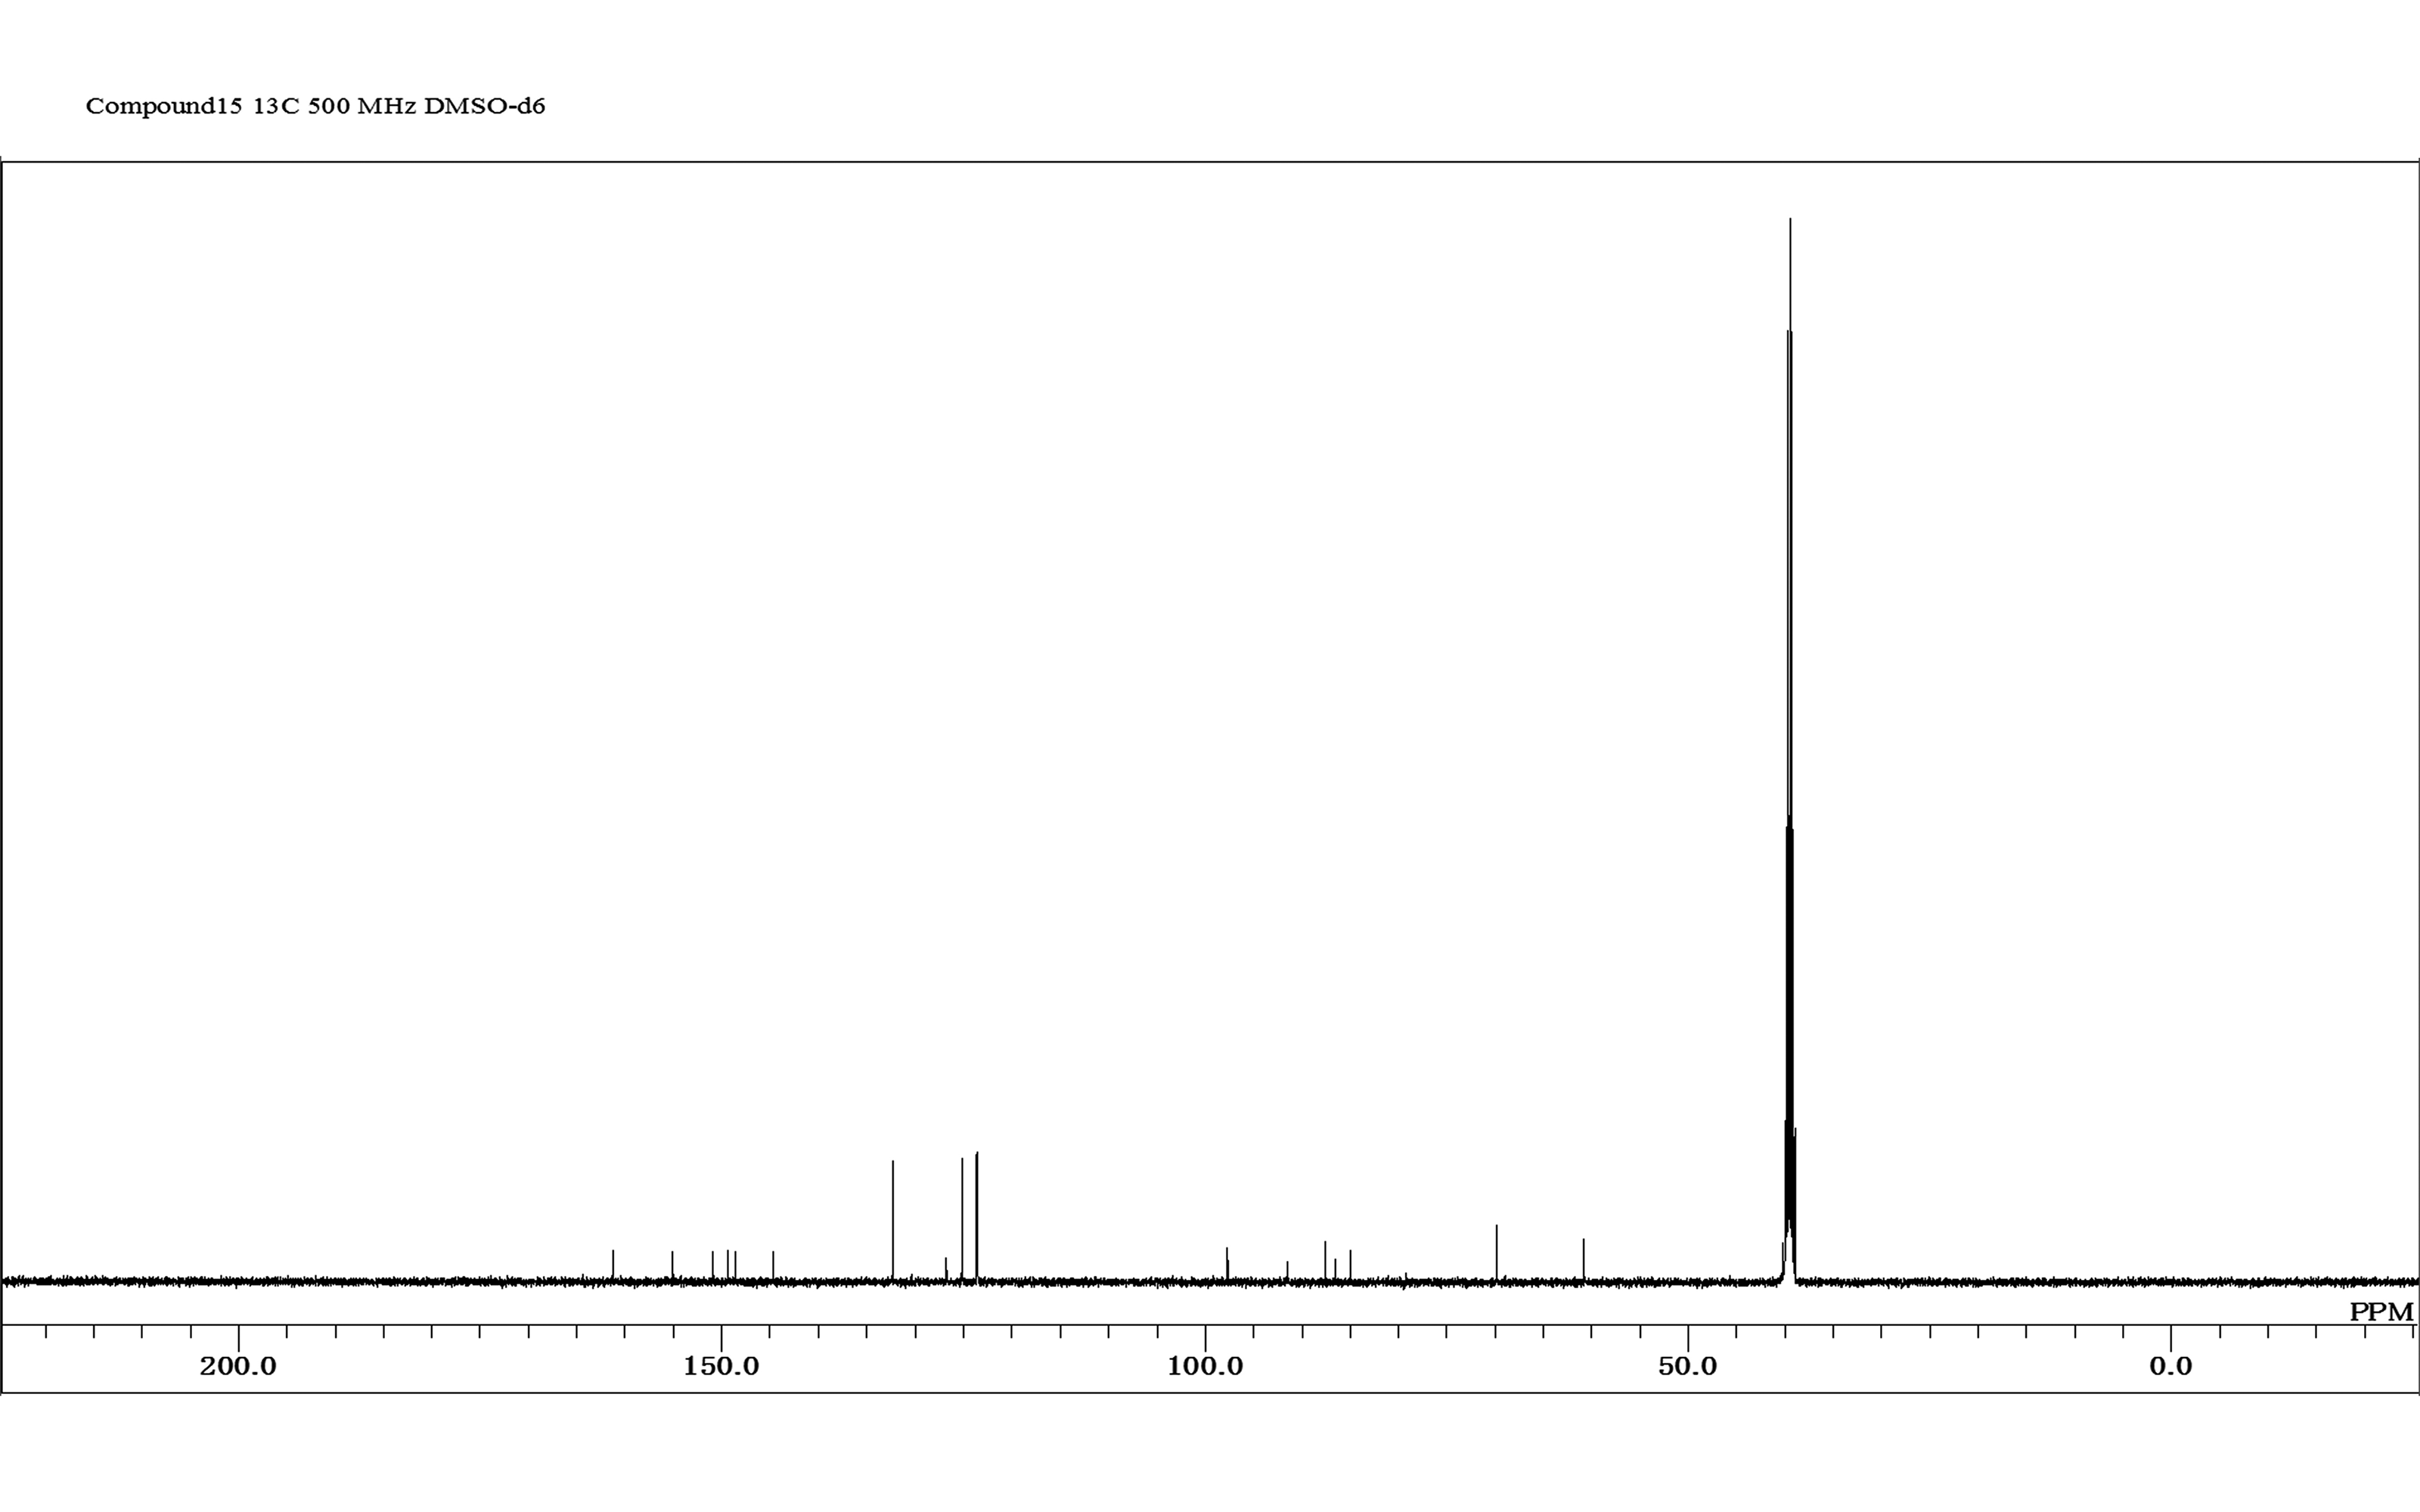
**

**Figure S18.** 13C-NMR spectrum of compound 15.


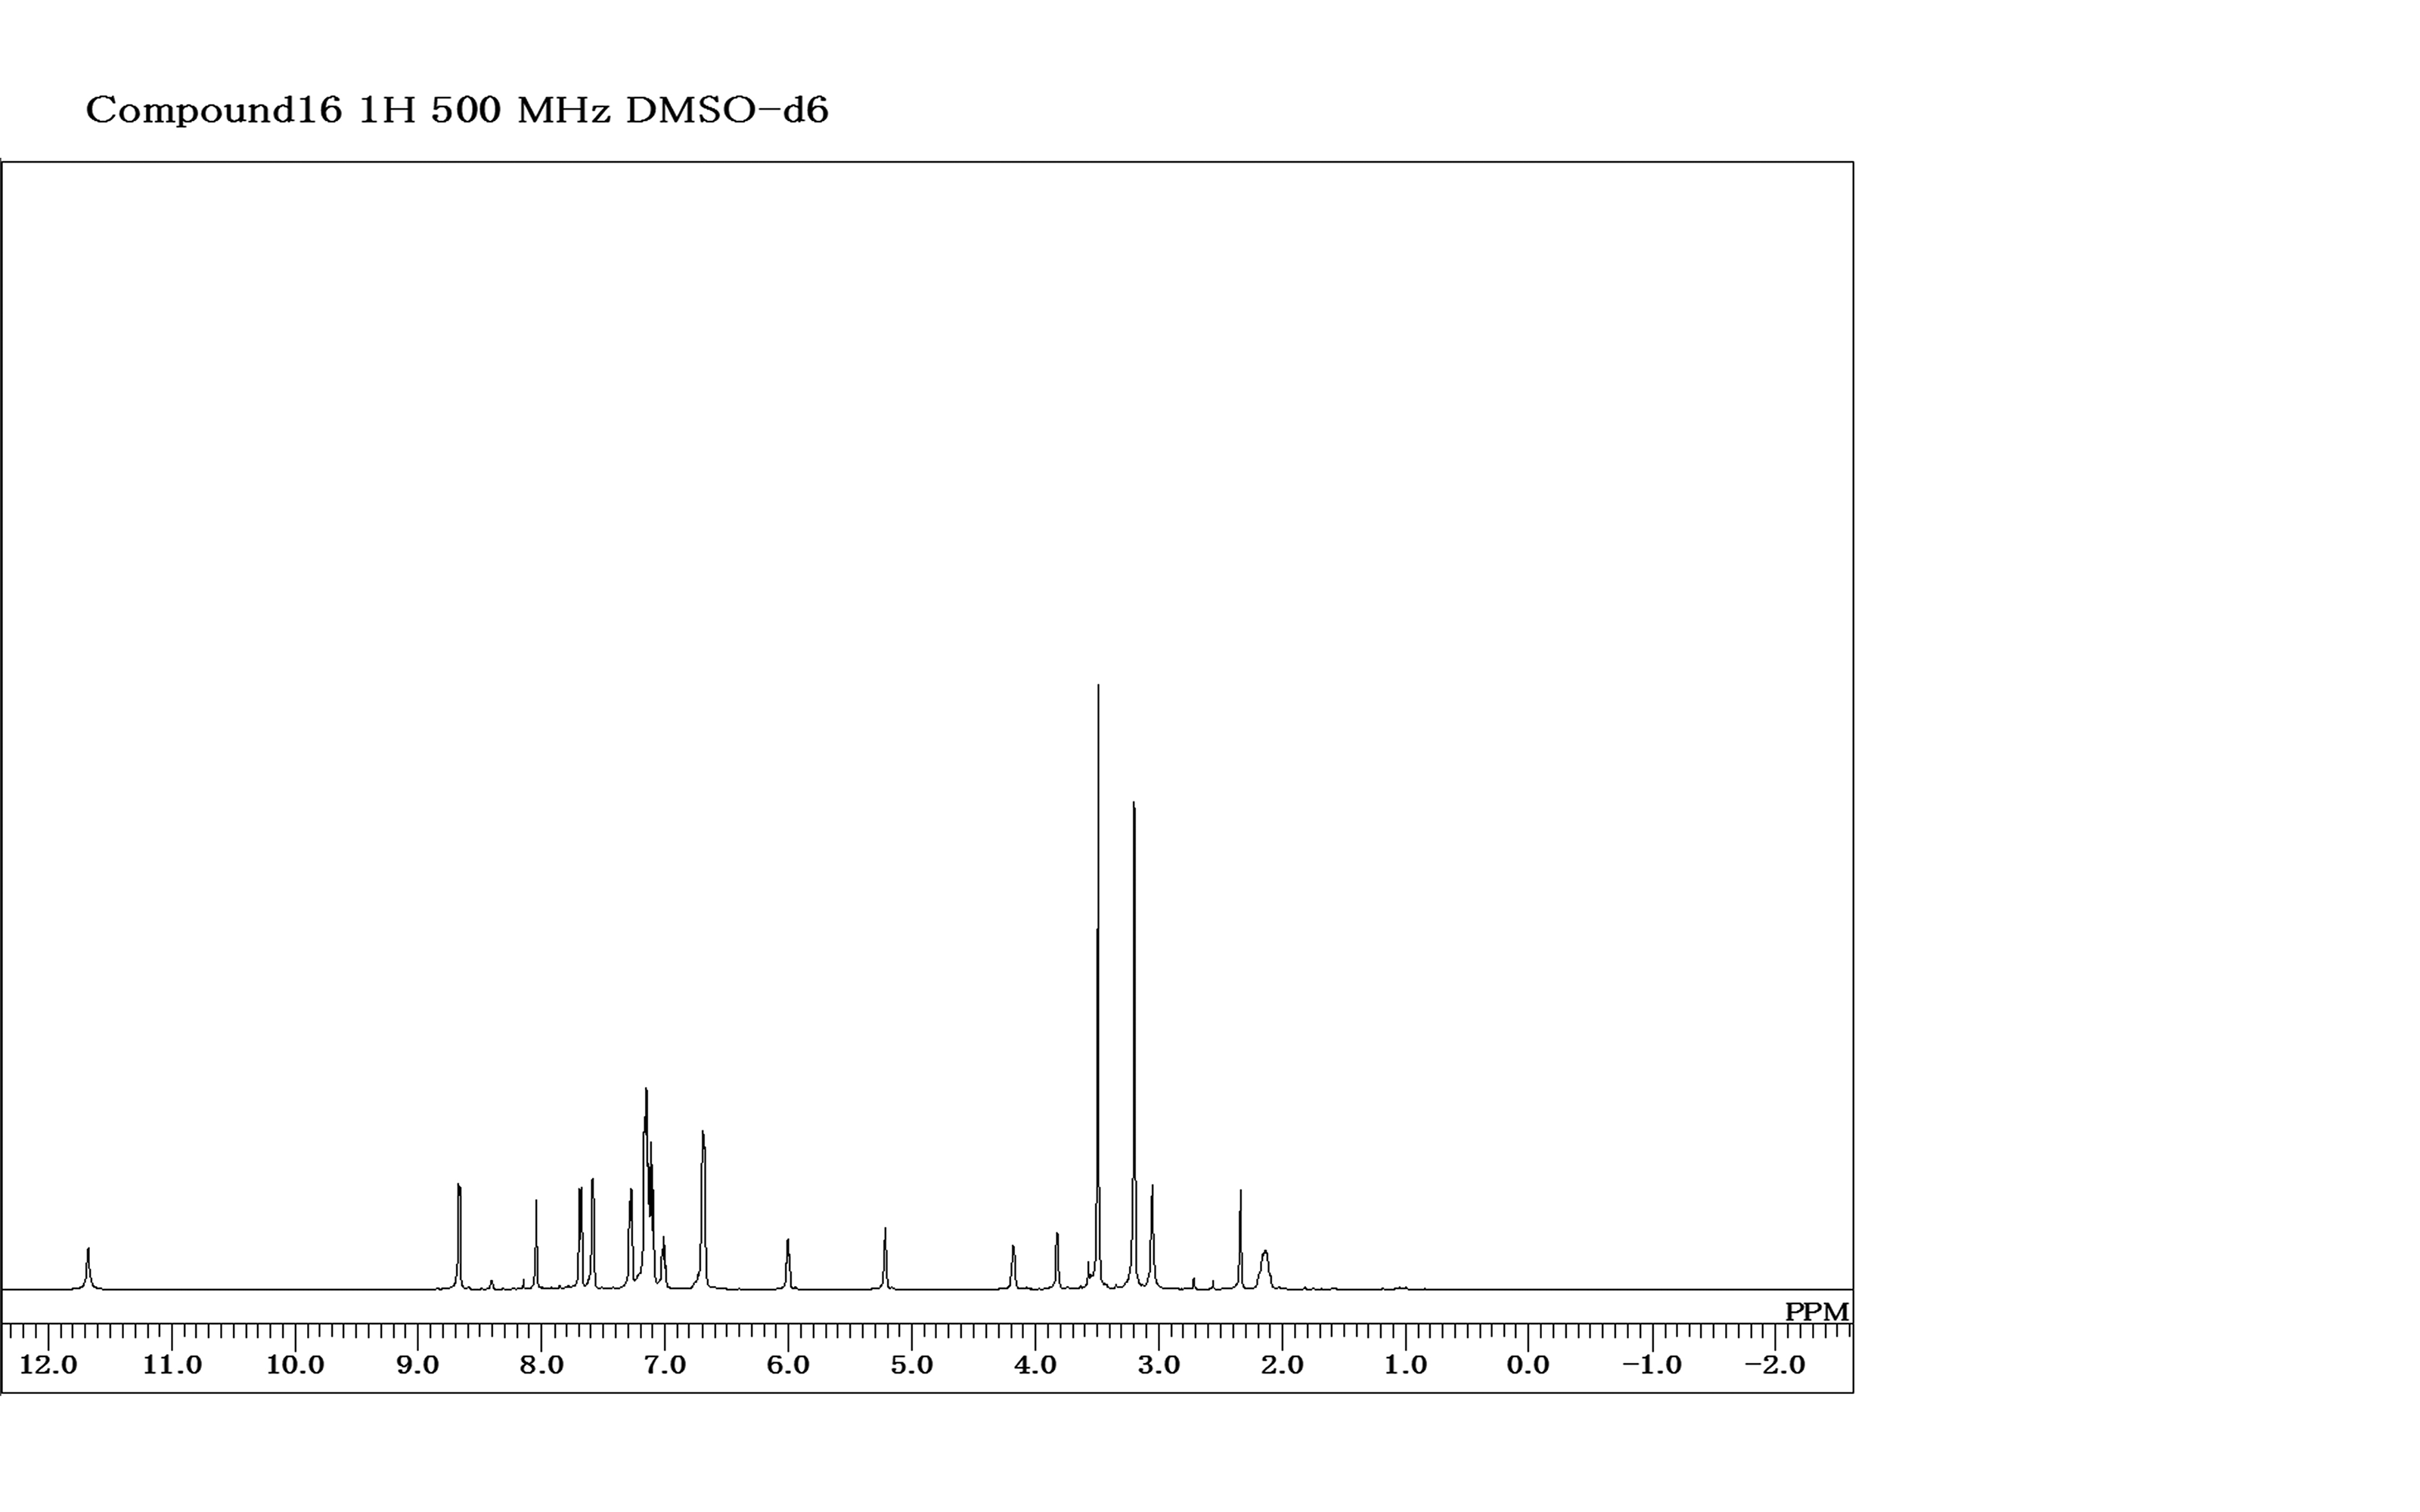


**Figure S19.** 1H-NMR spectrum of compound 16.


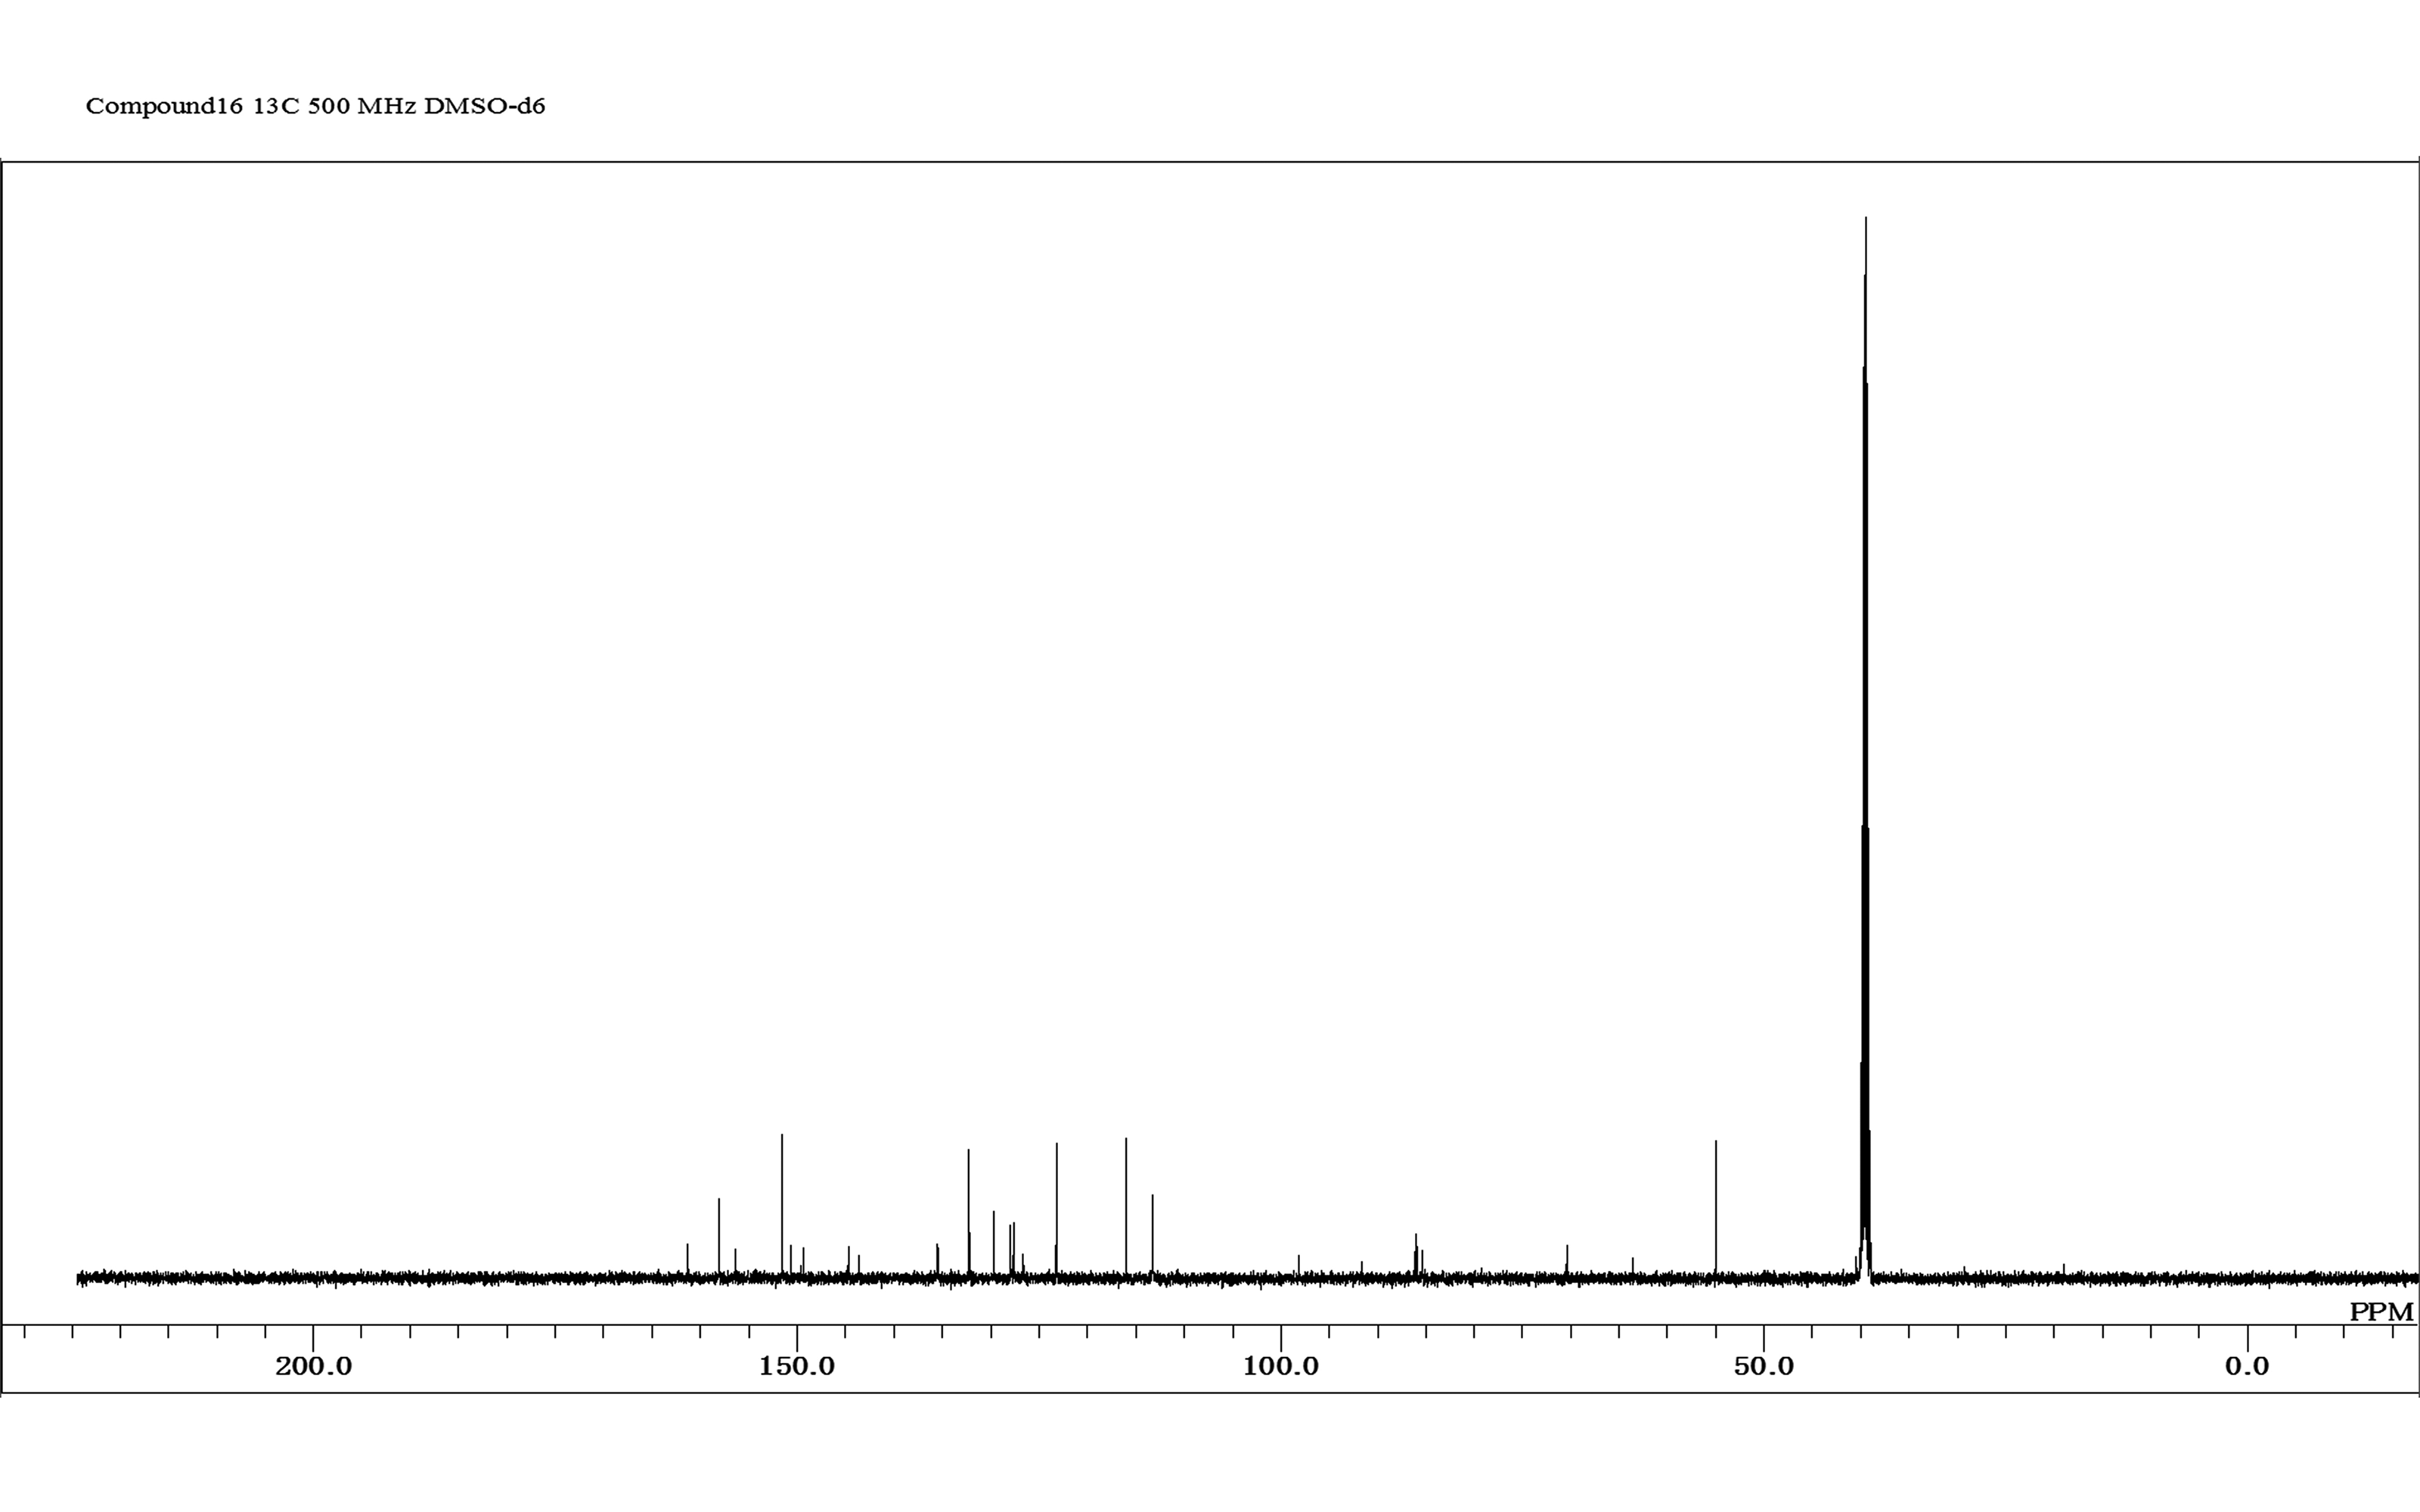


**Figure S20.** 13C-NMR spectrum of compound 16.


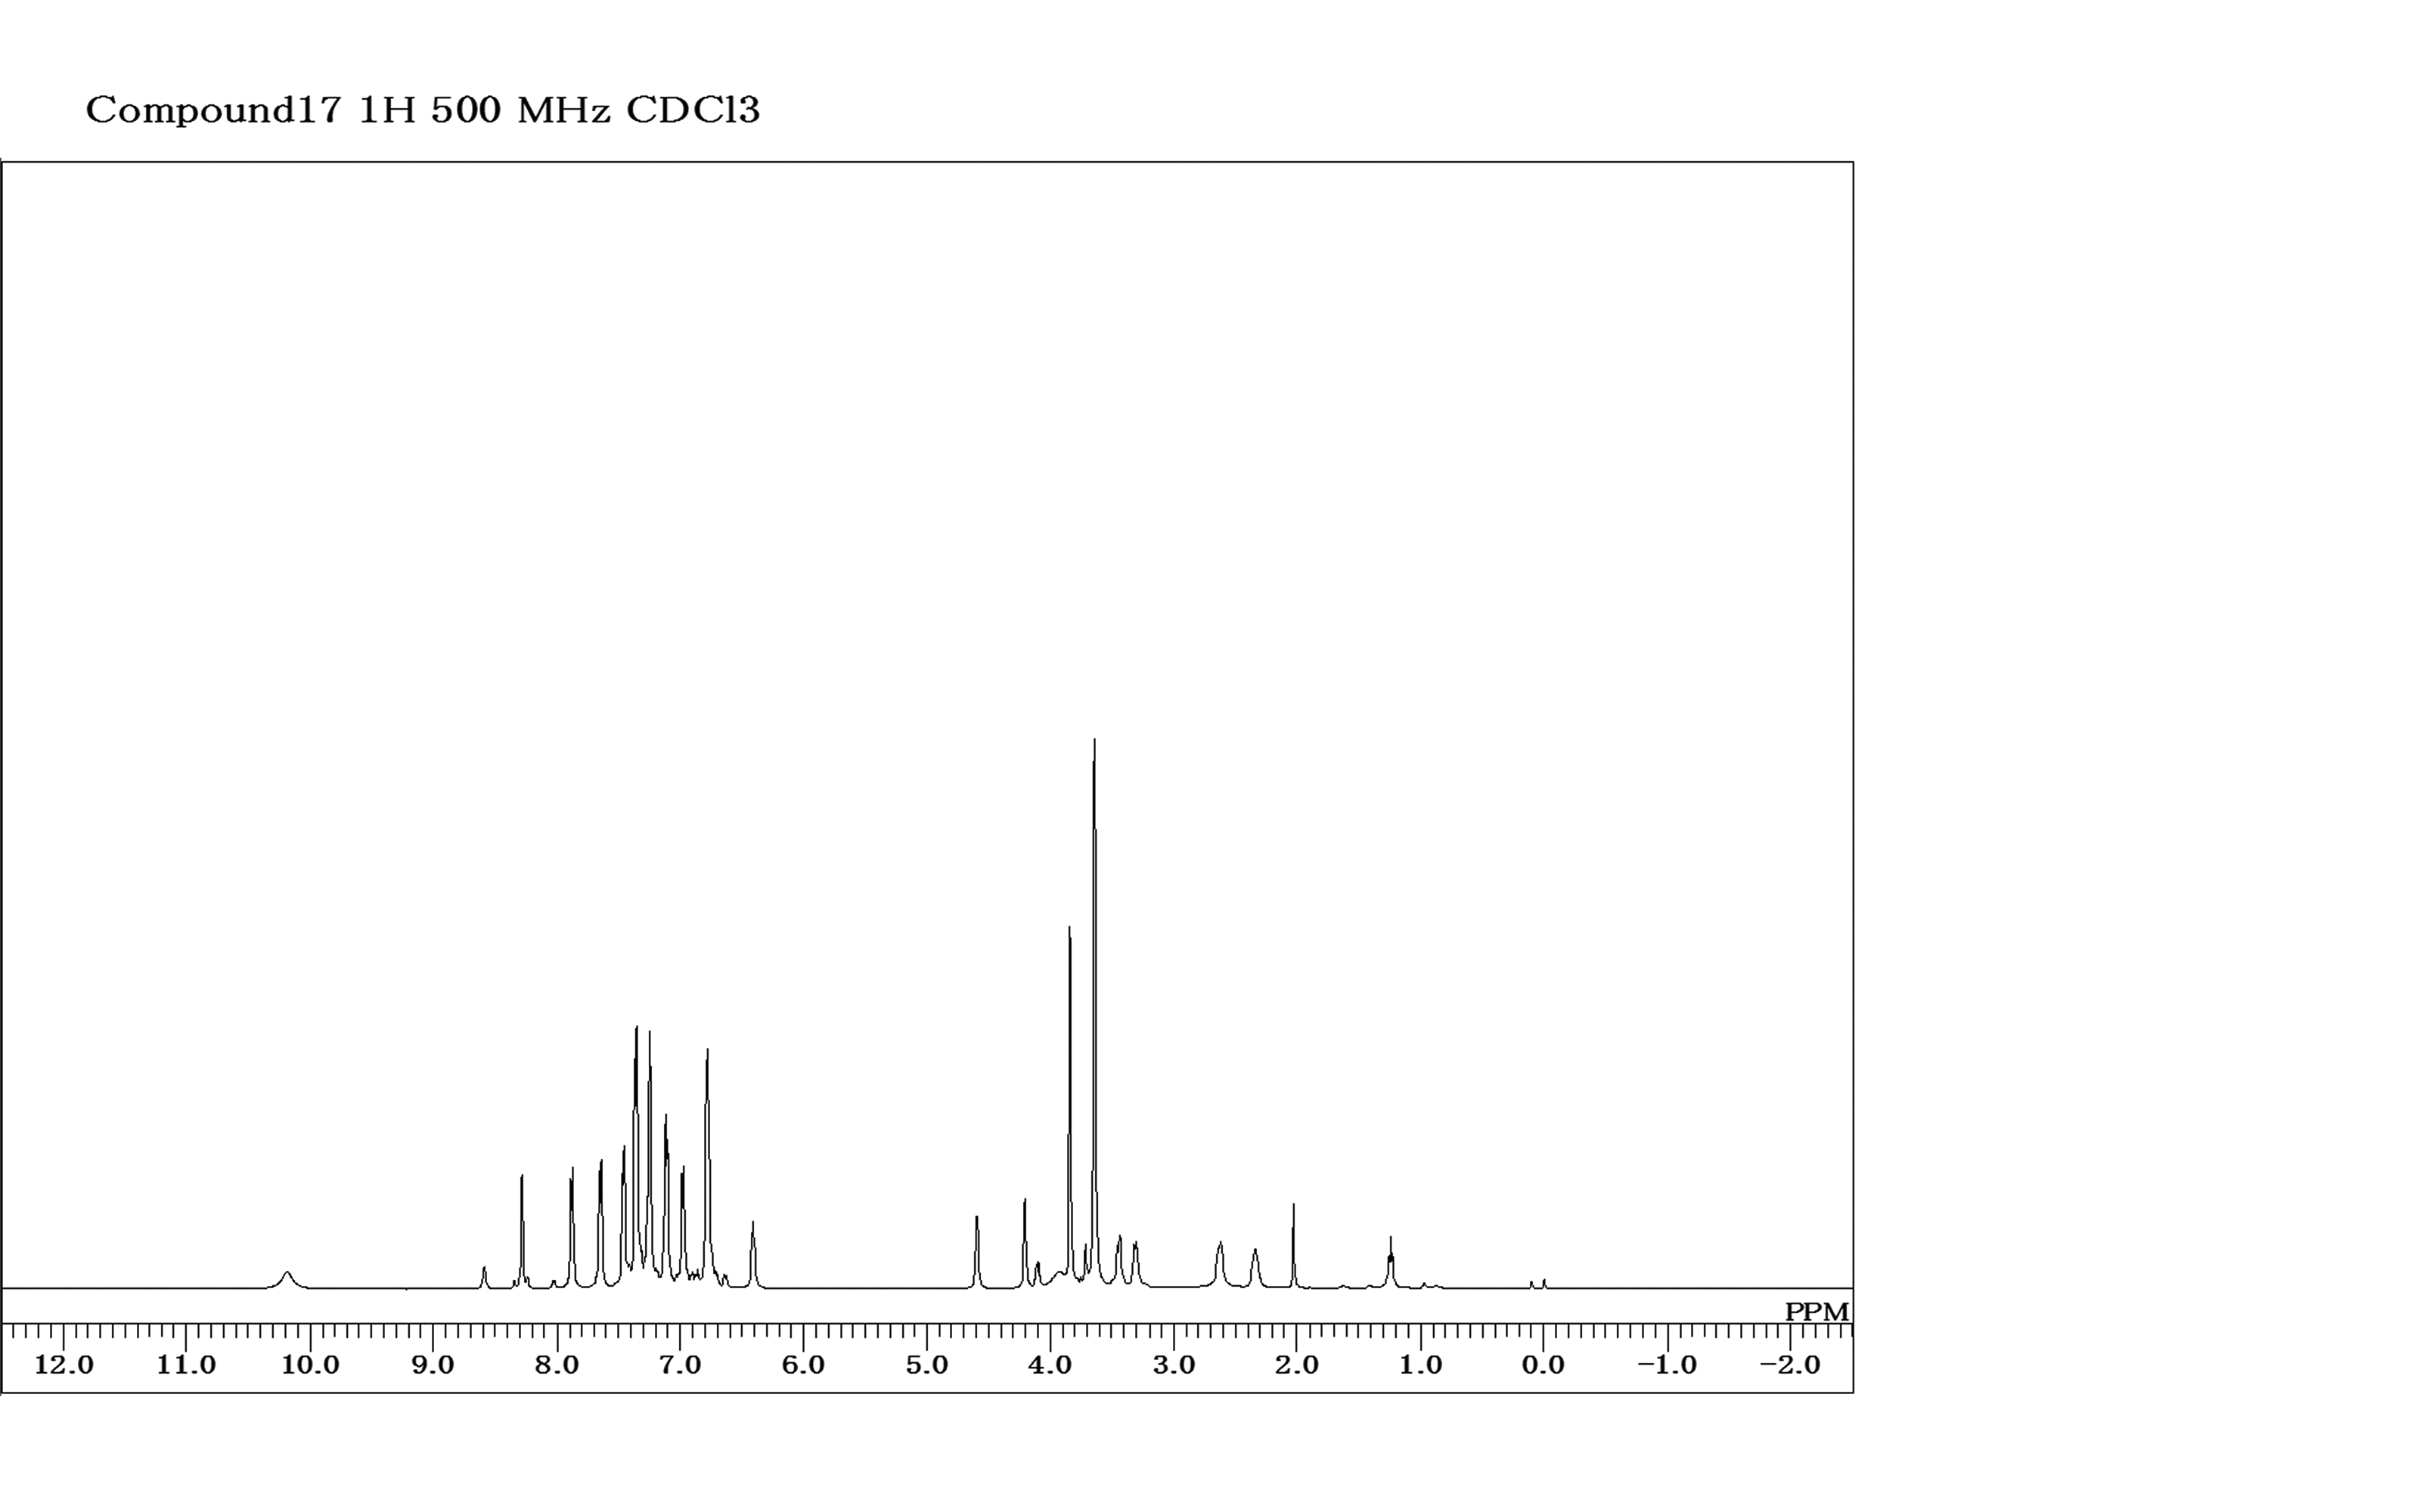


**Figure S21.** 1H-NMR spectrum of compound 17.


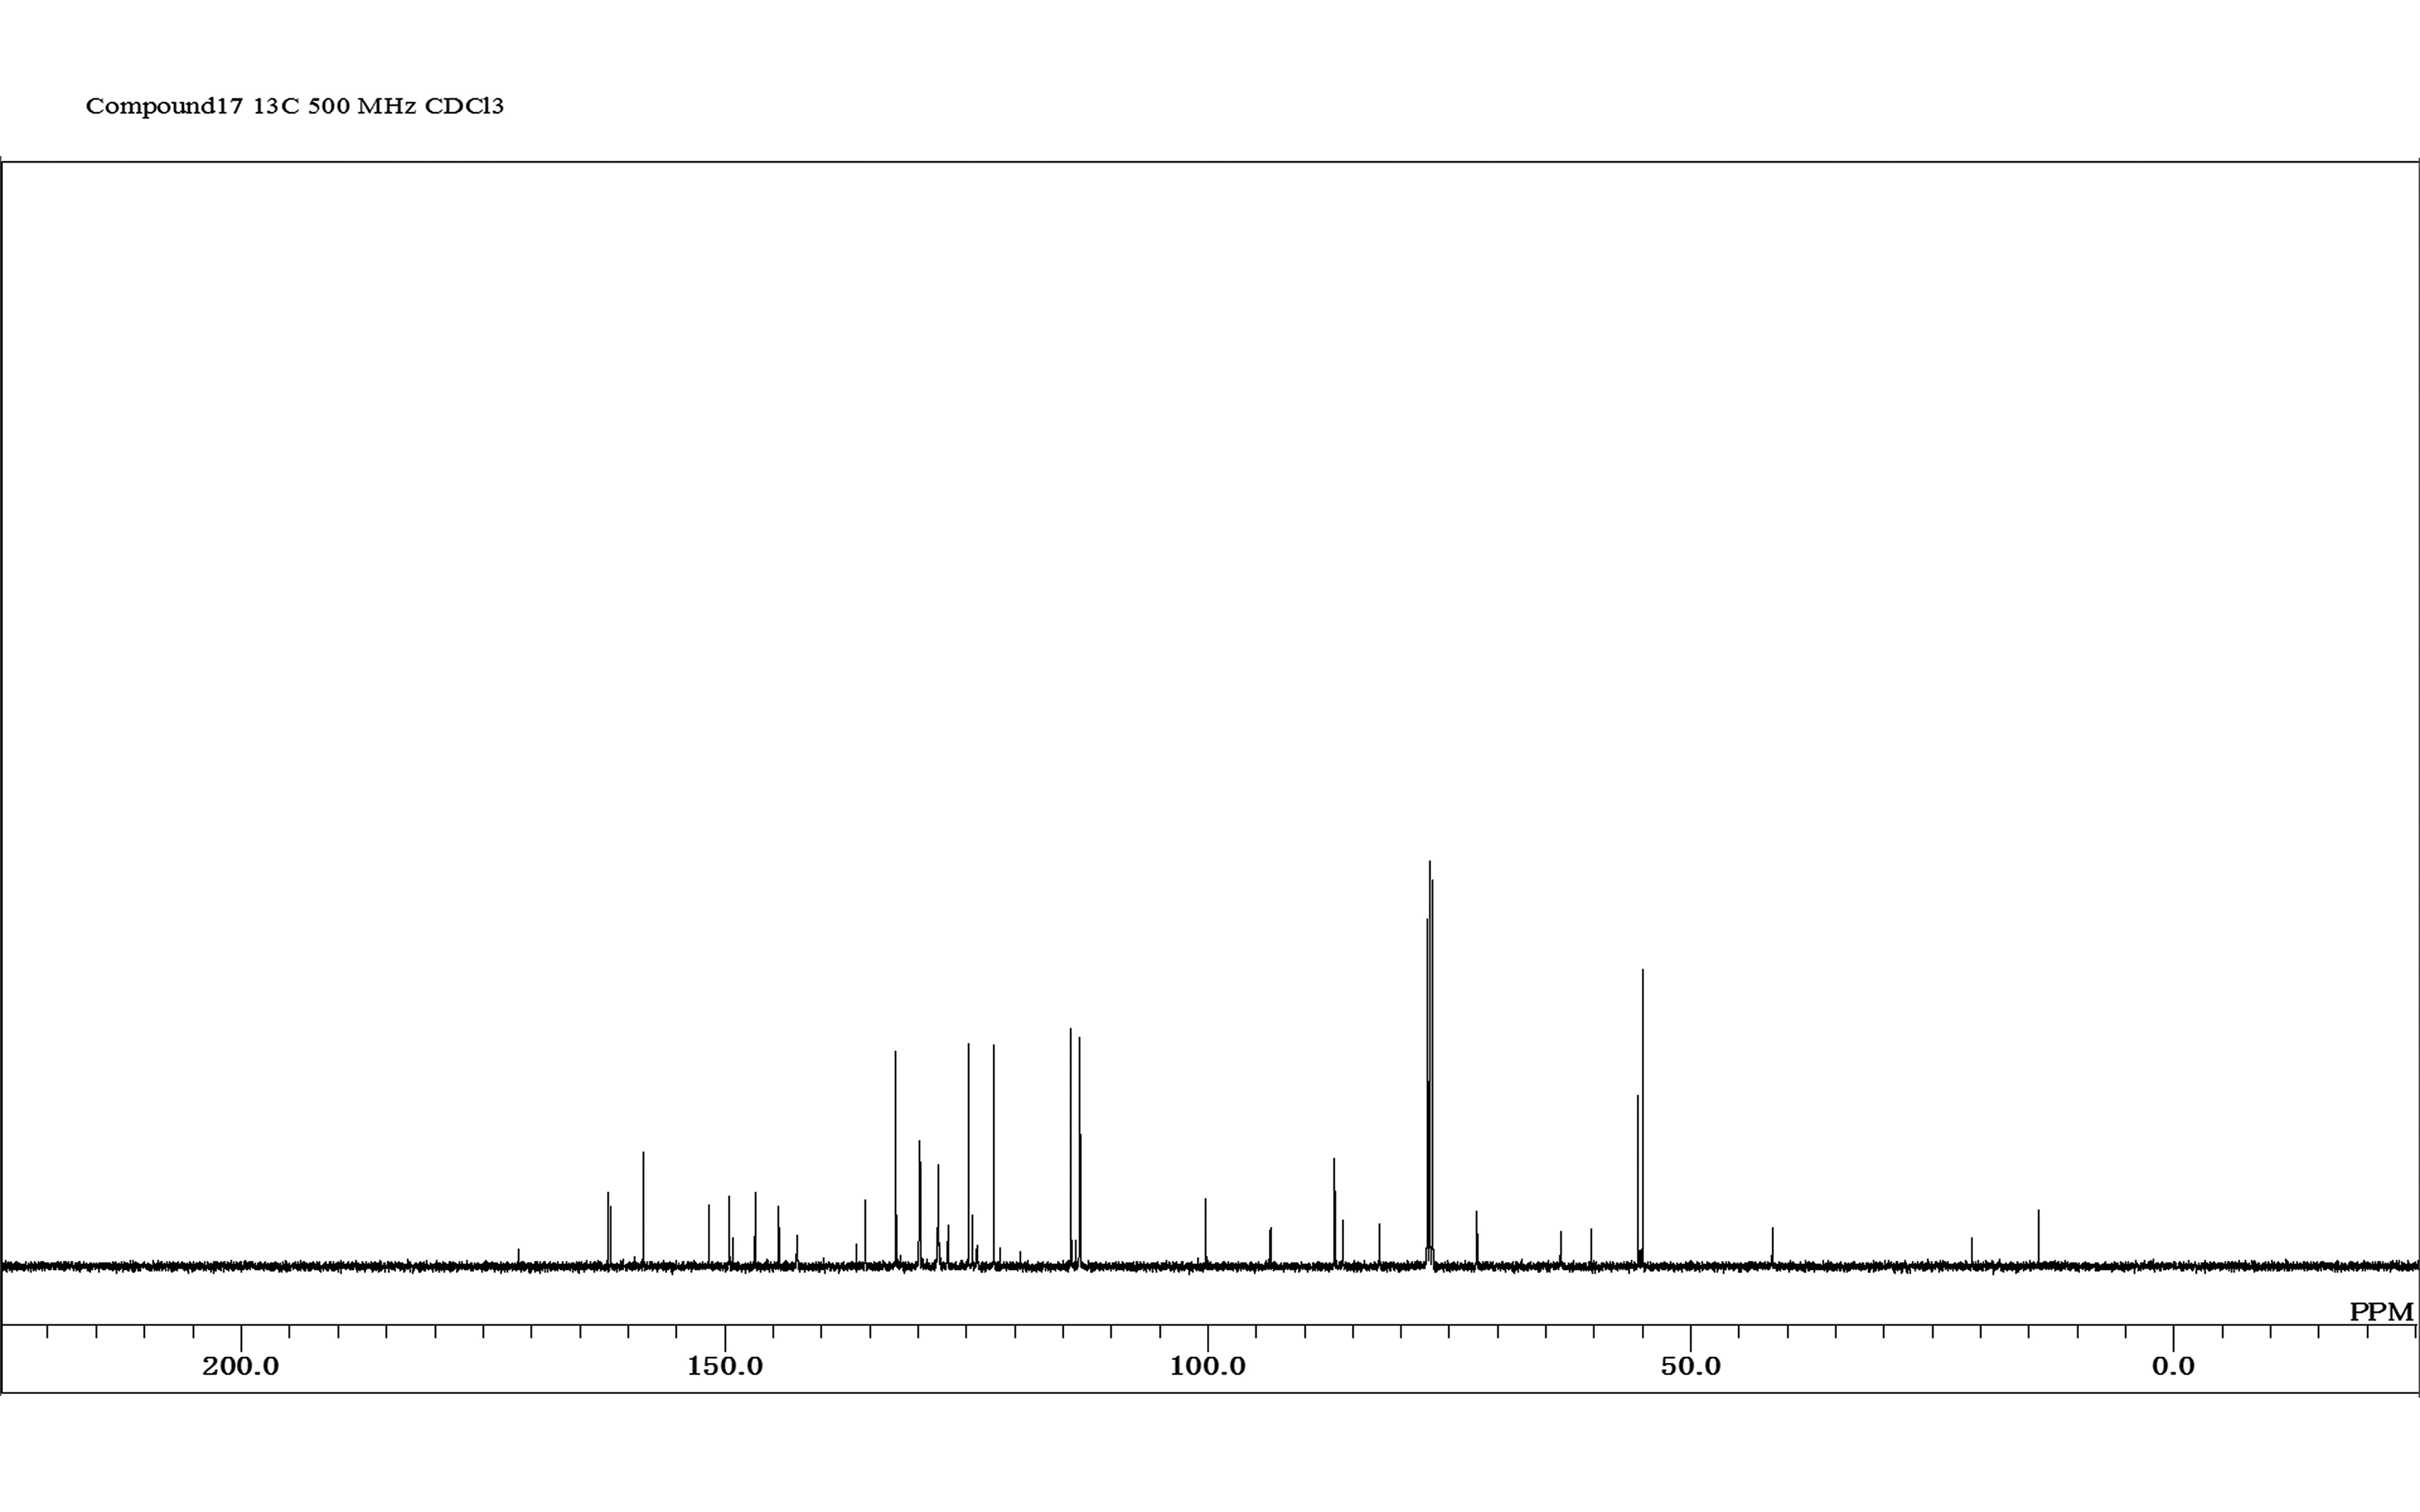


**Figure S22.** 13C-NMR spectrum of compound 17.


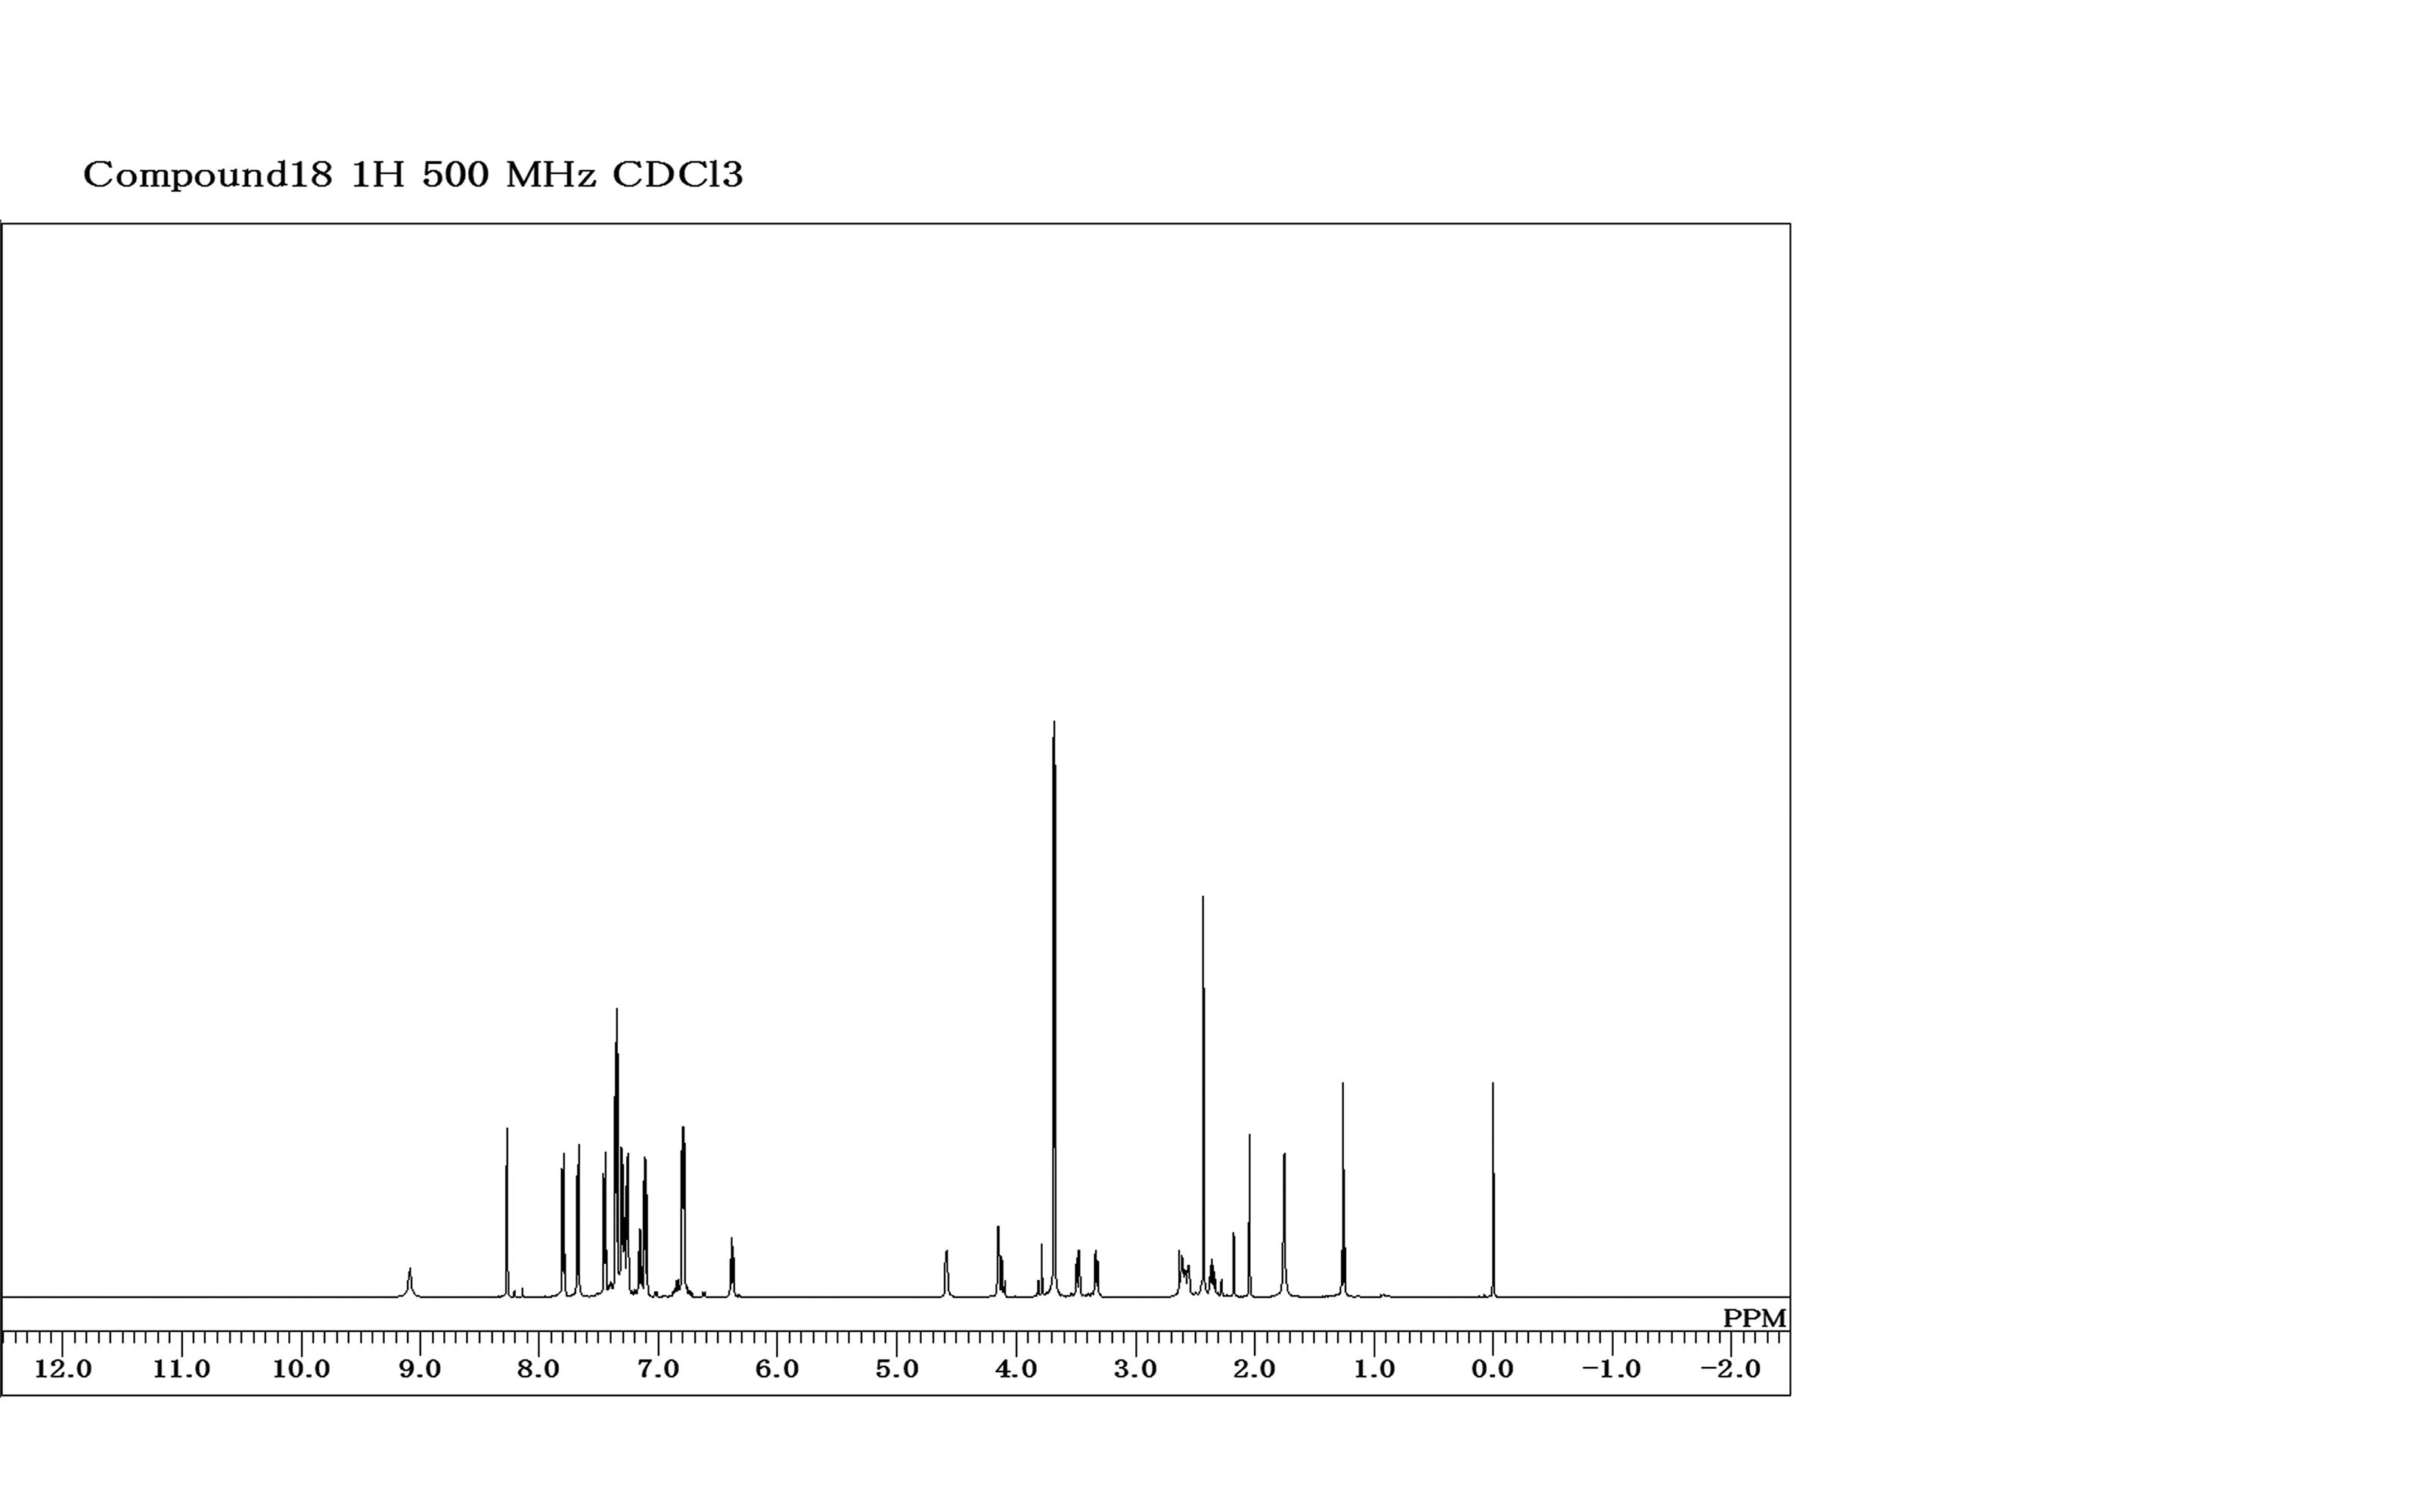


**Figure S23.** 1H-NMR spectrum of compound 18.


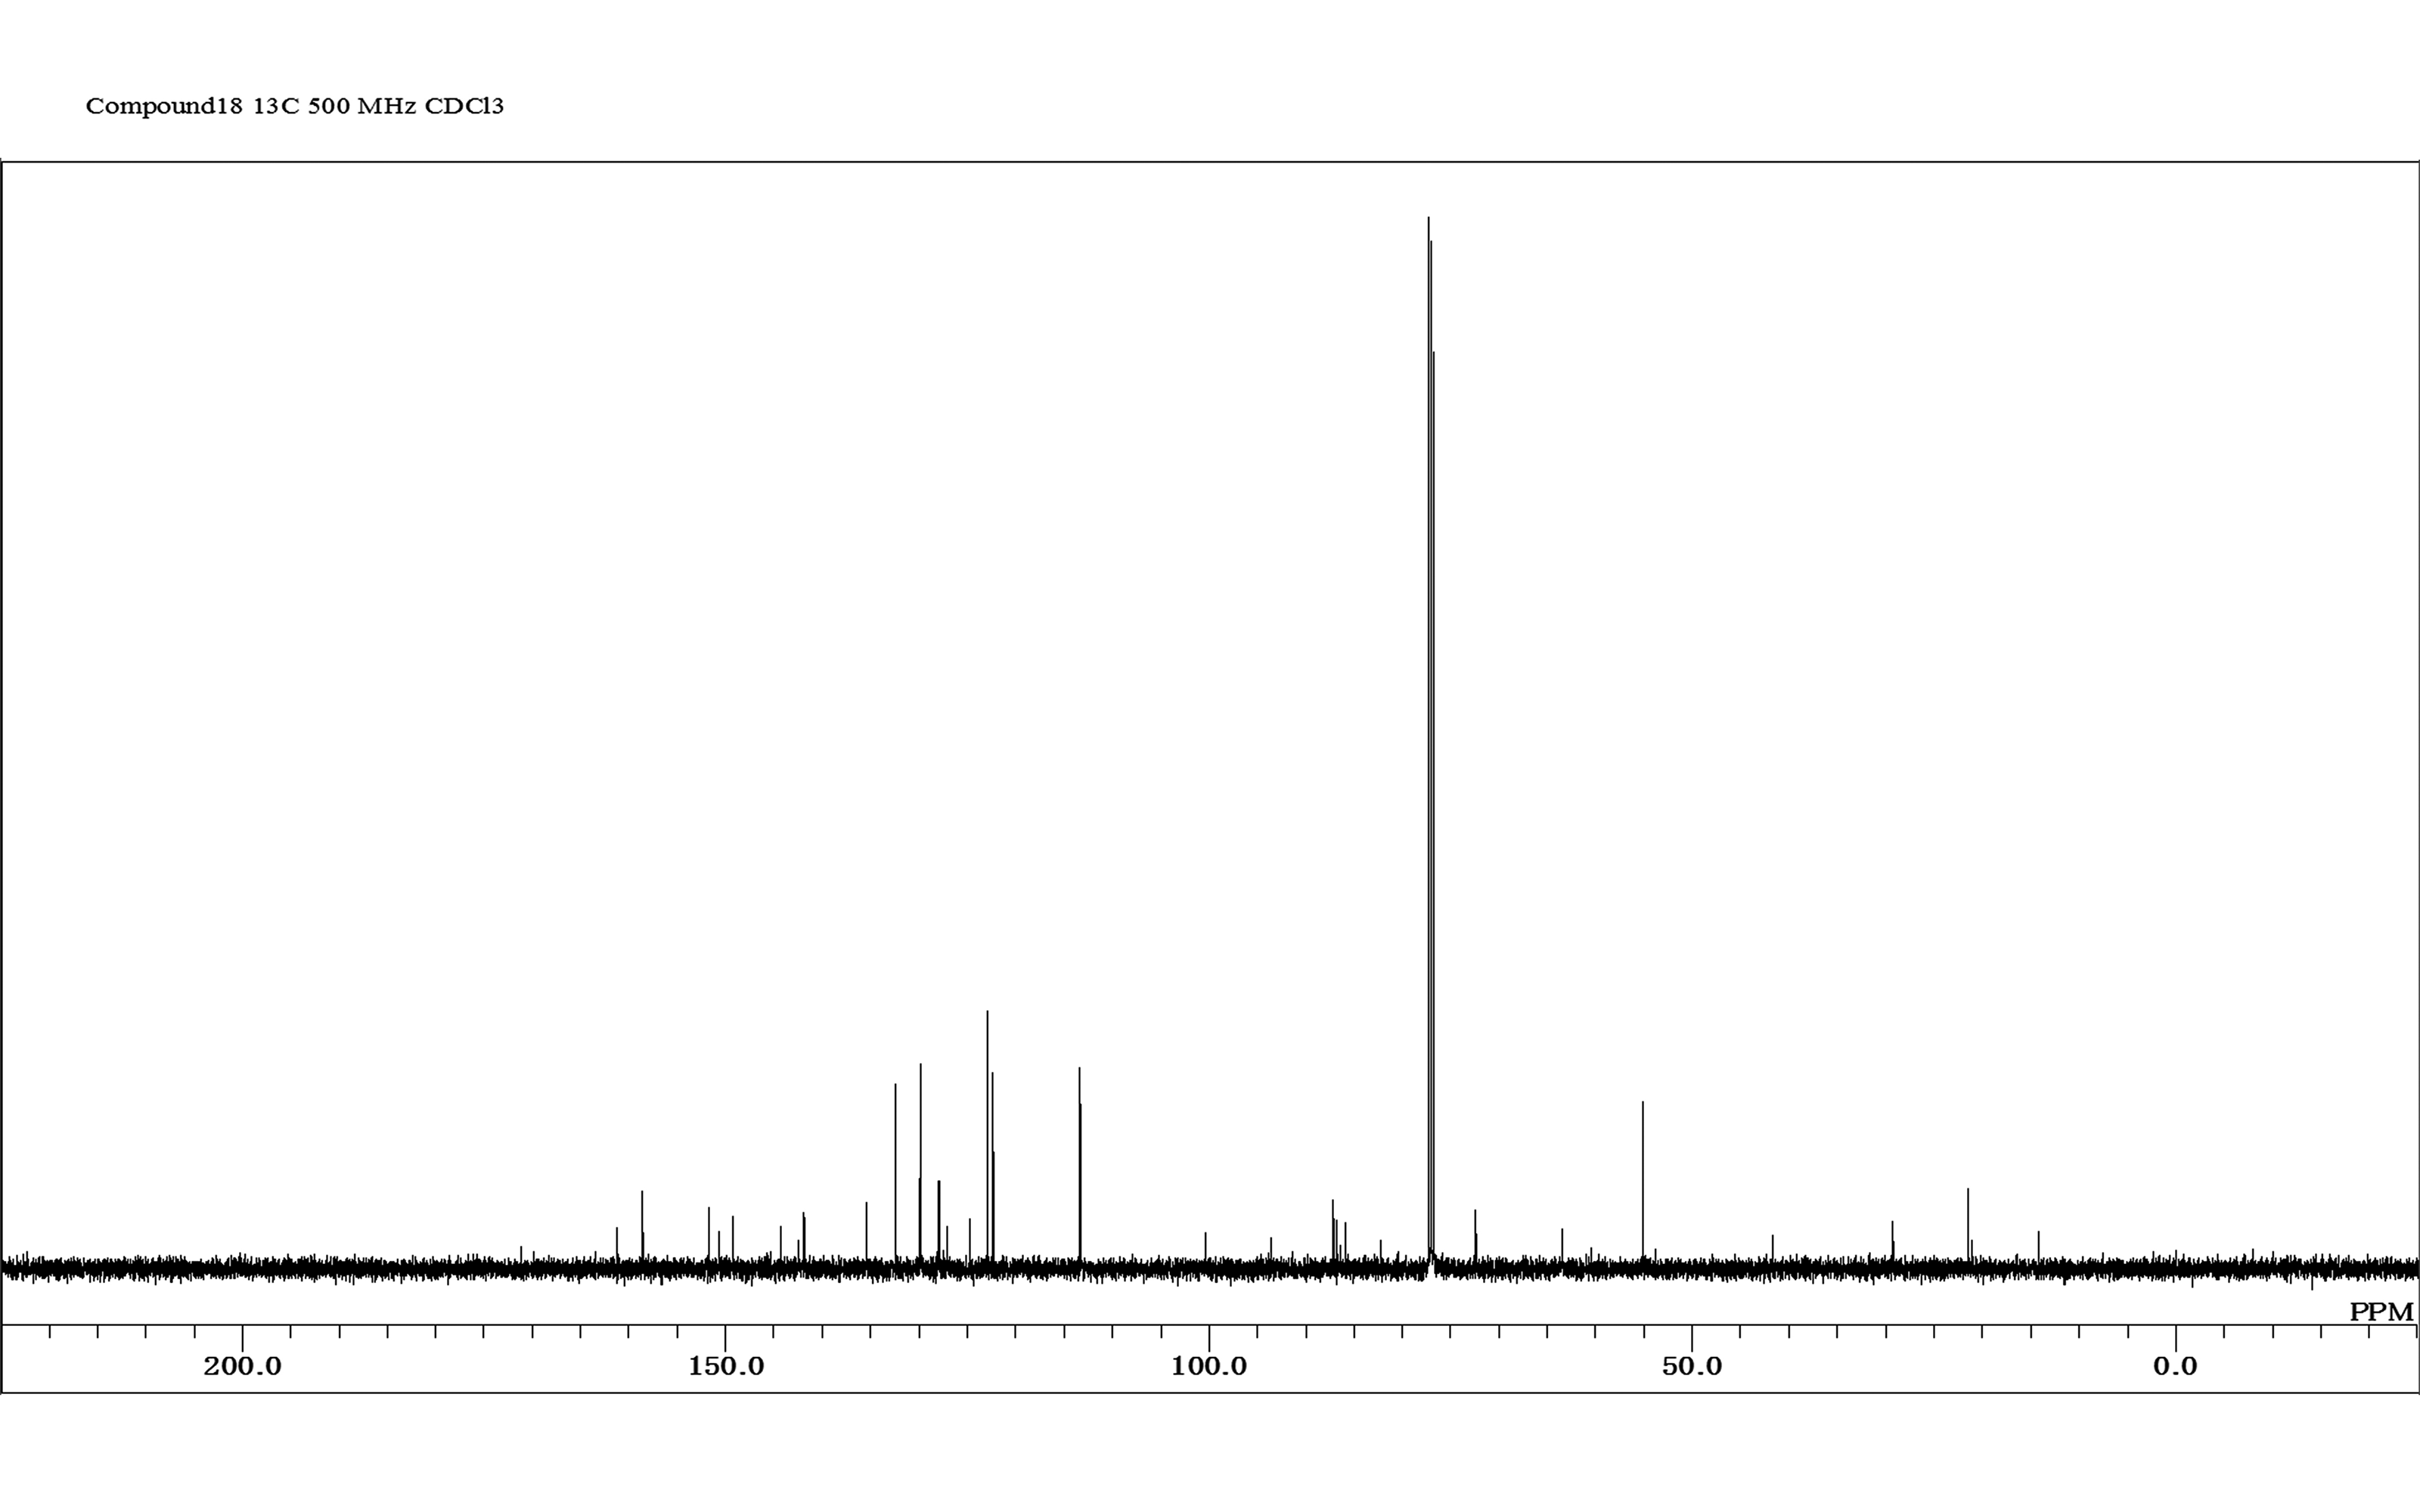


**Figure S24.** 13C-NMR spectrum of compound 18.


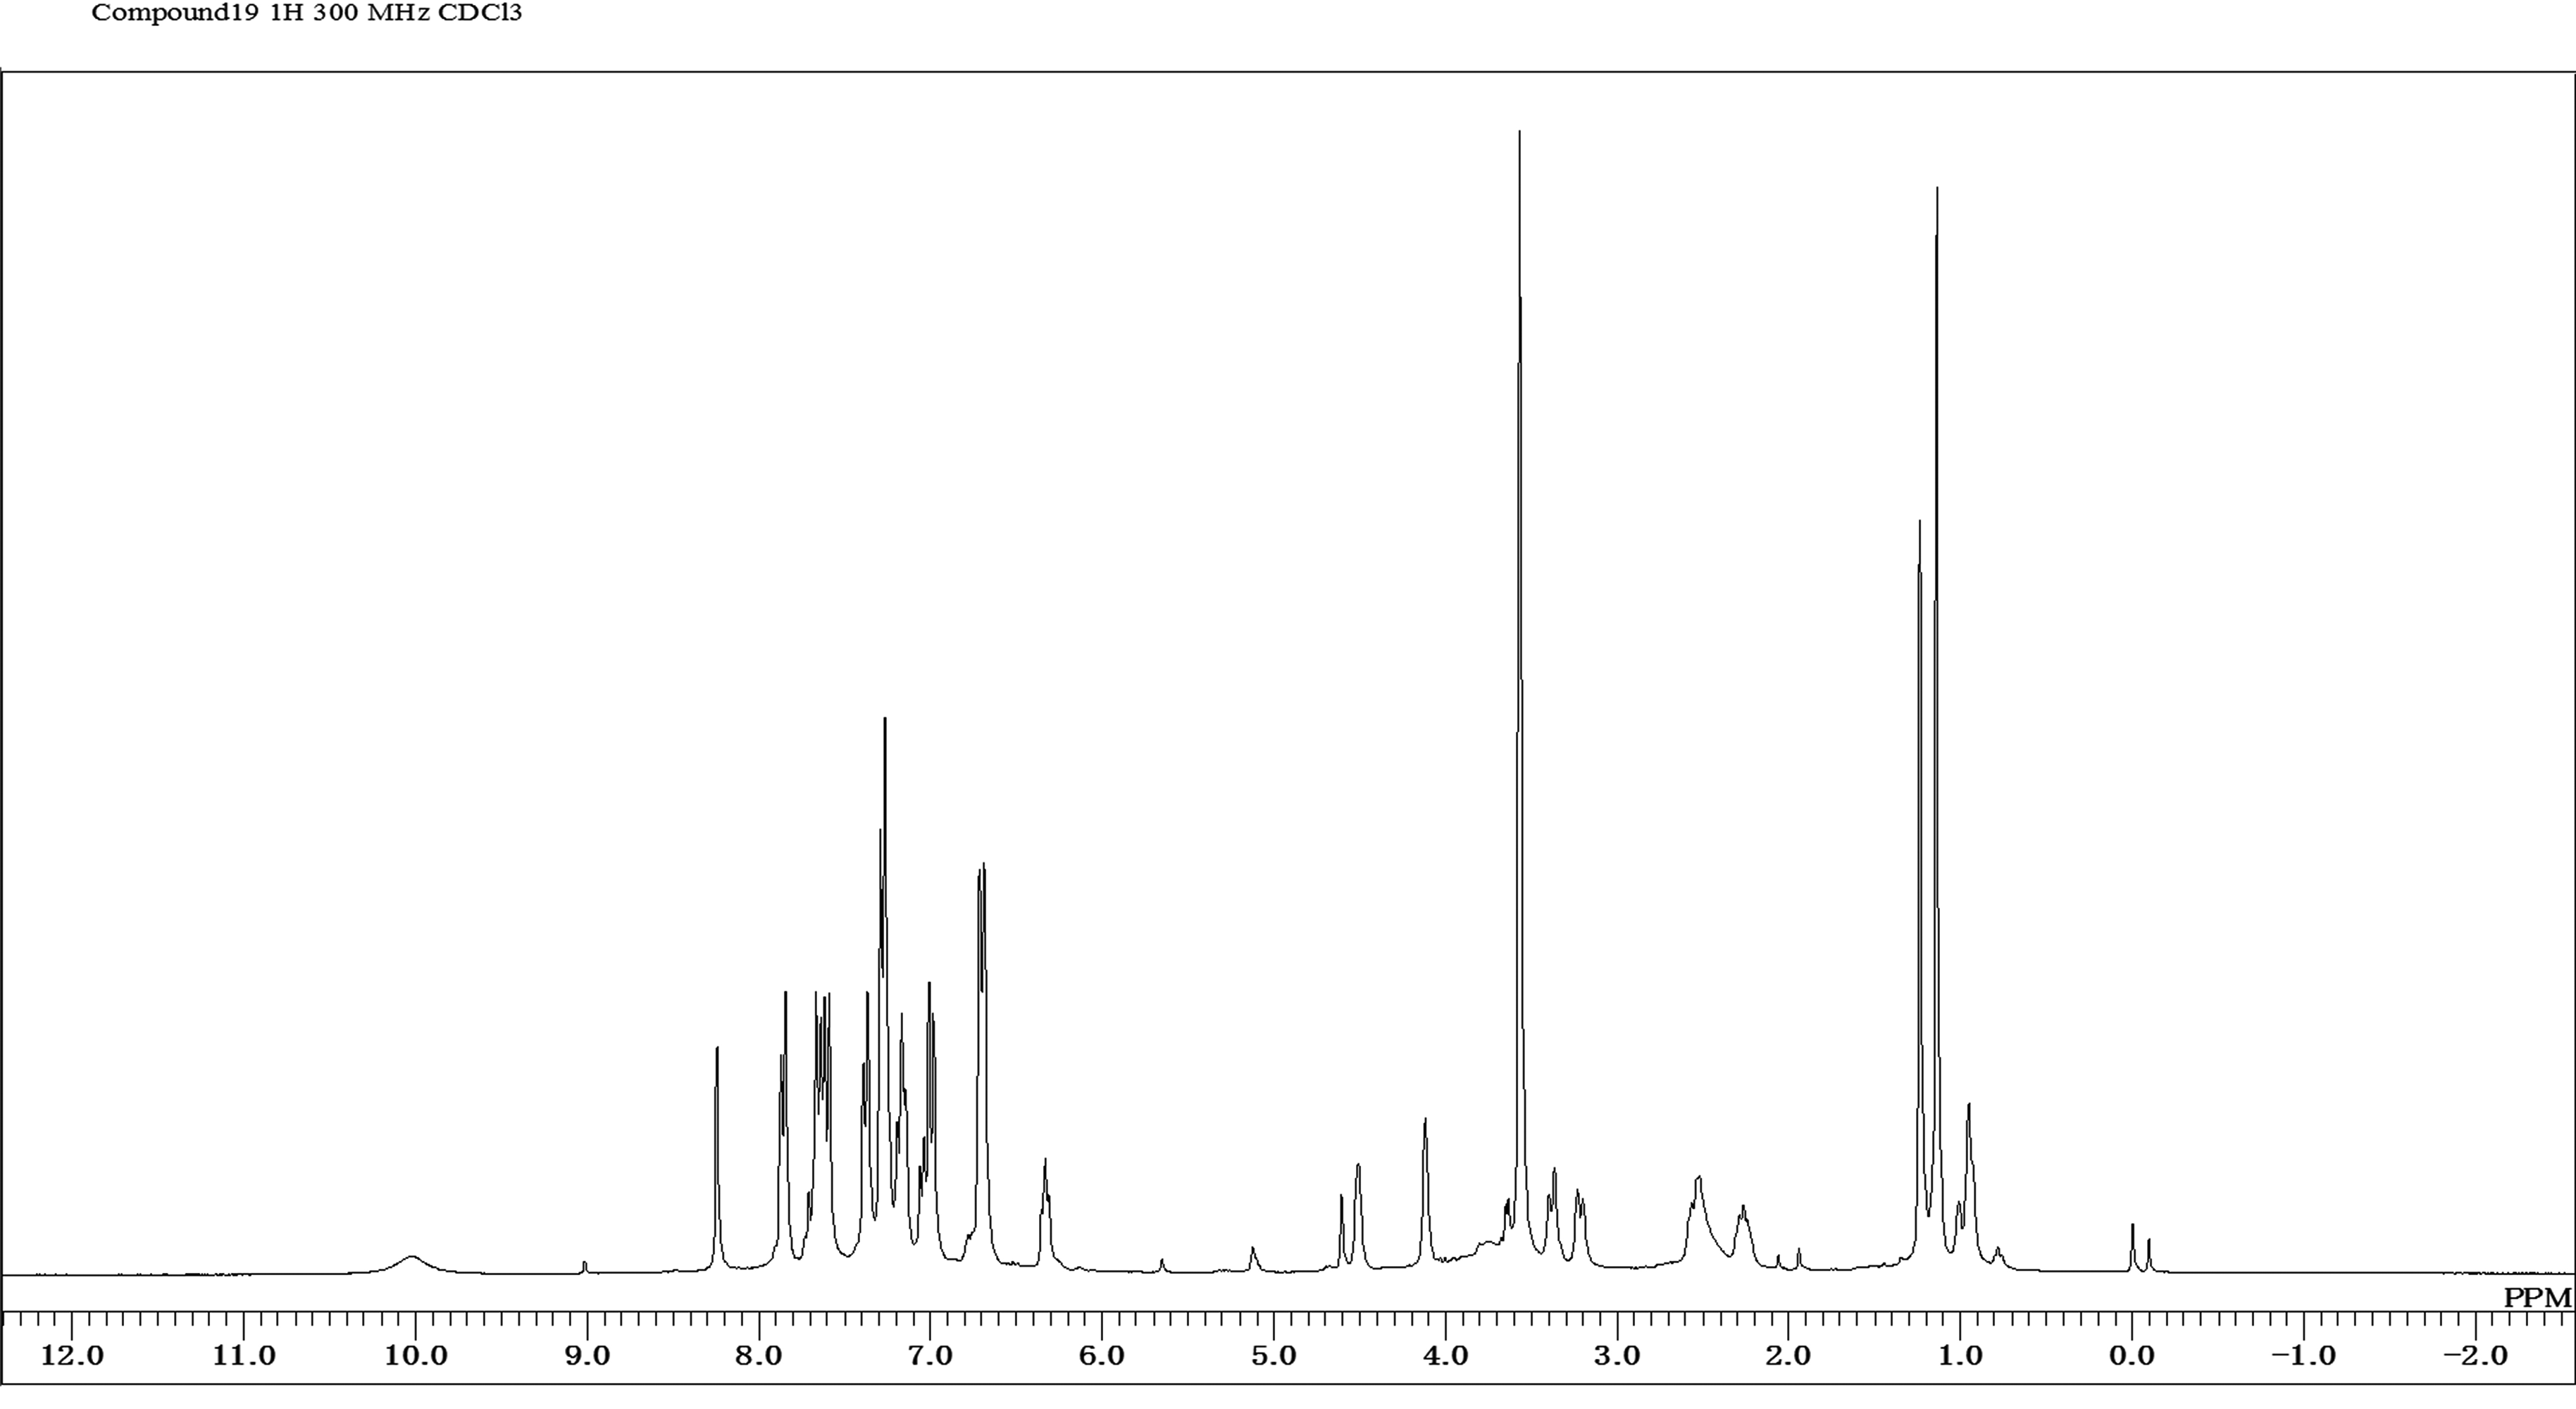


**Figure S25.** 1H-NMR spectrum of compound 19.


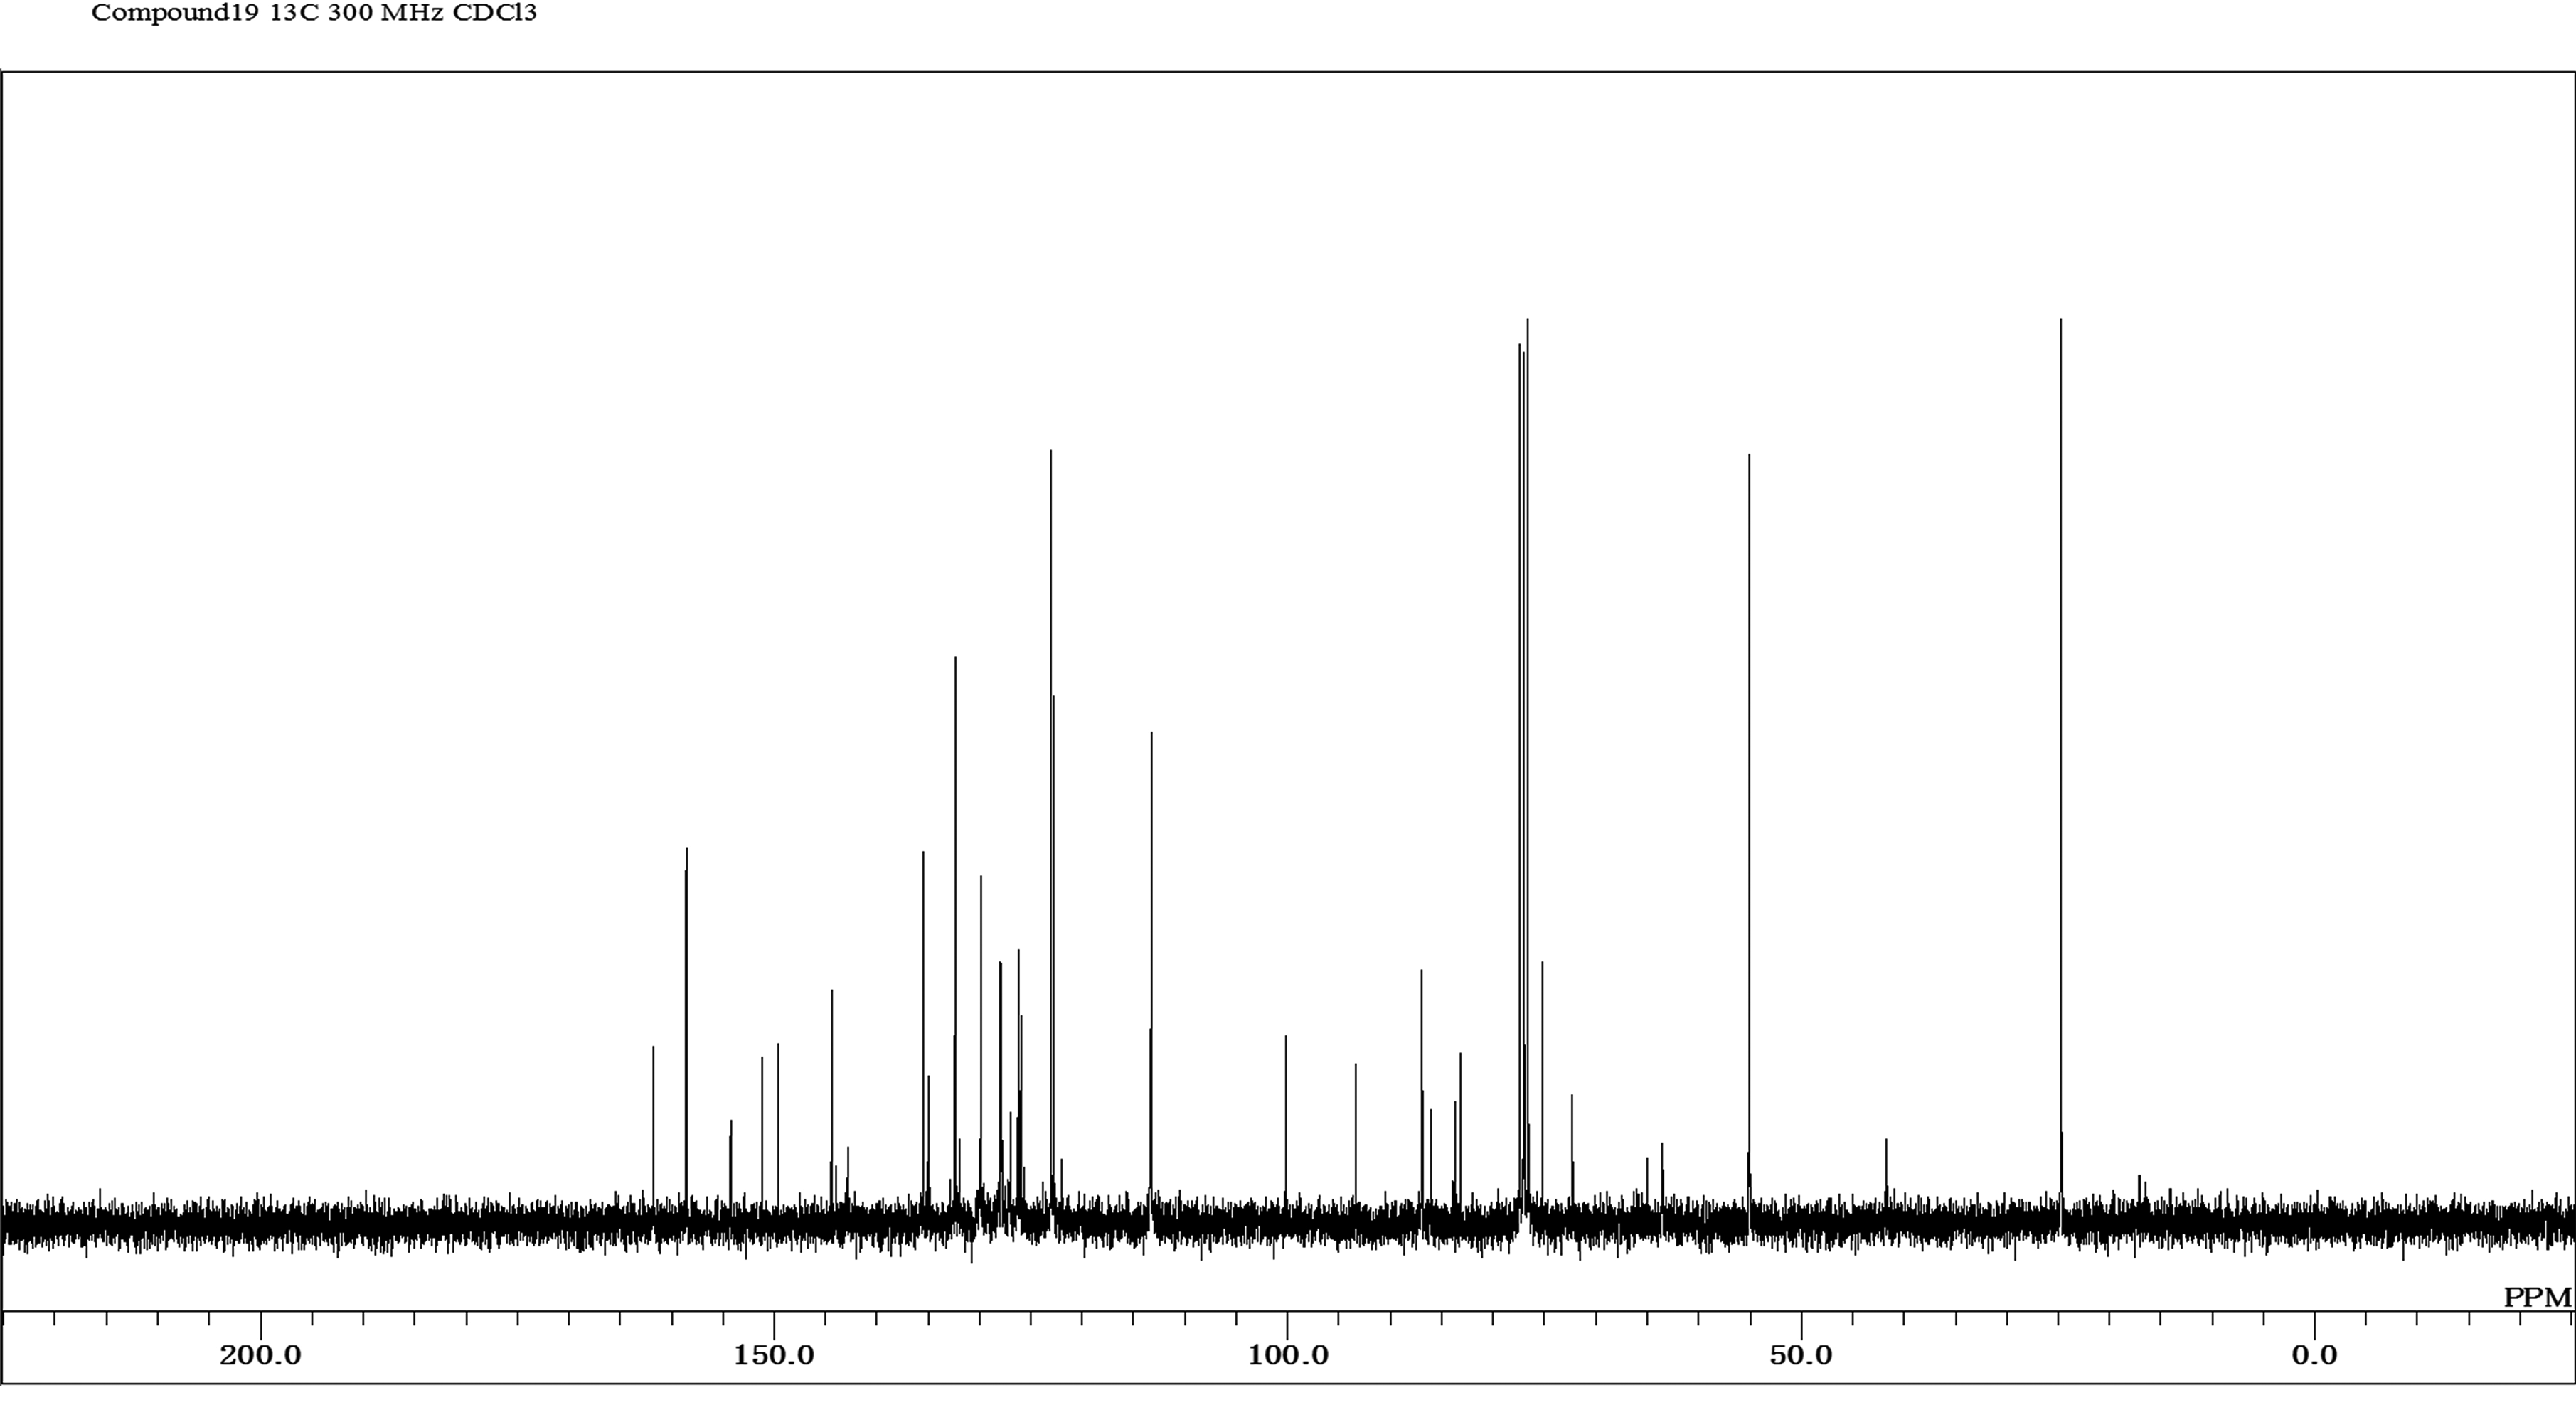


**Figure S26.** 13C-NMR spectrum of compound 19.


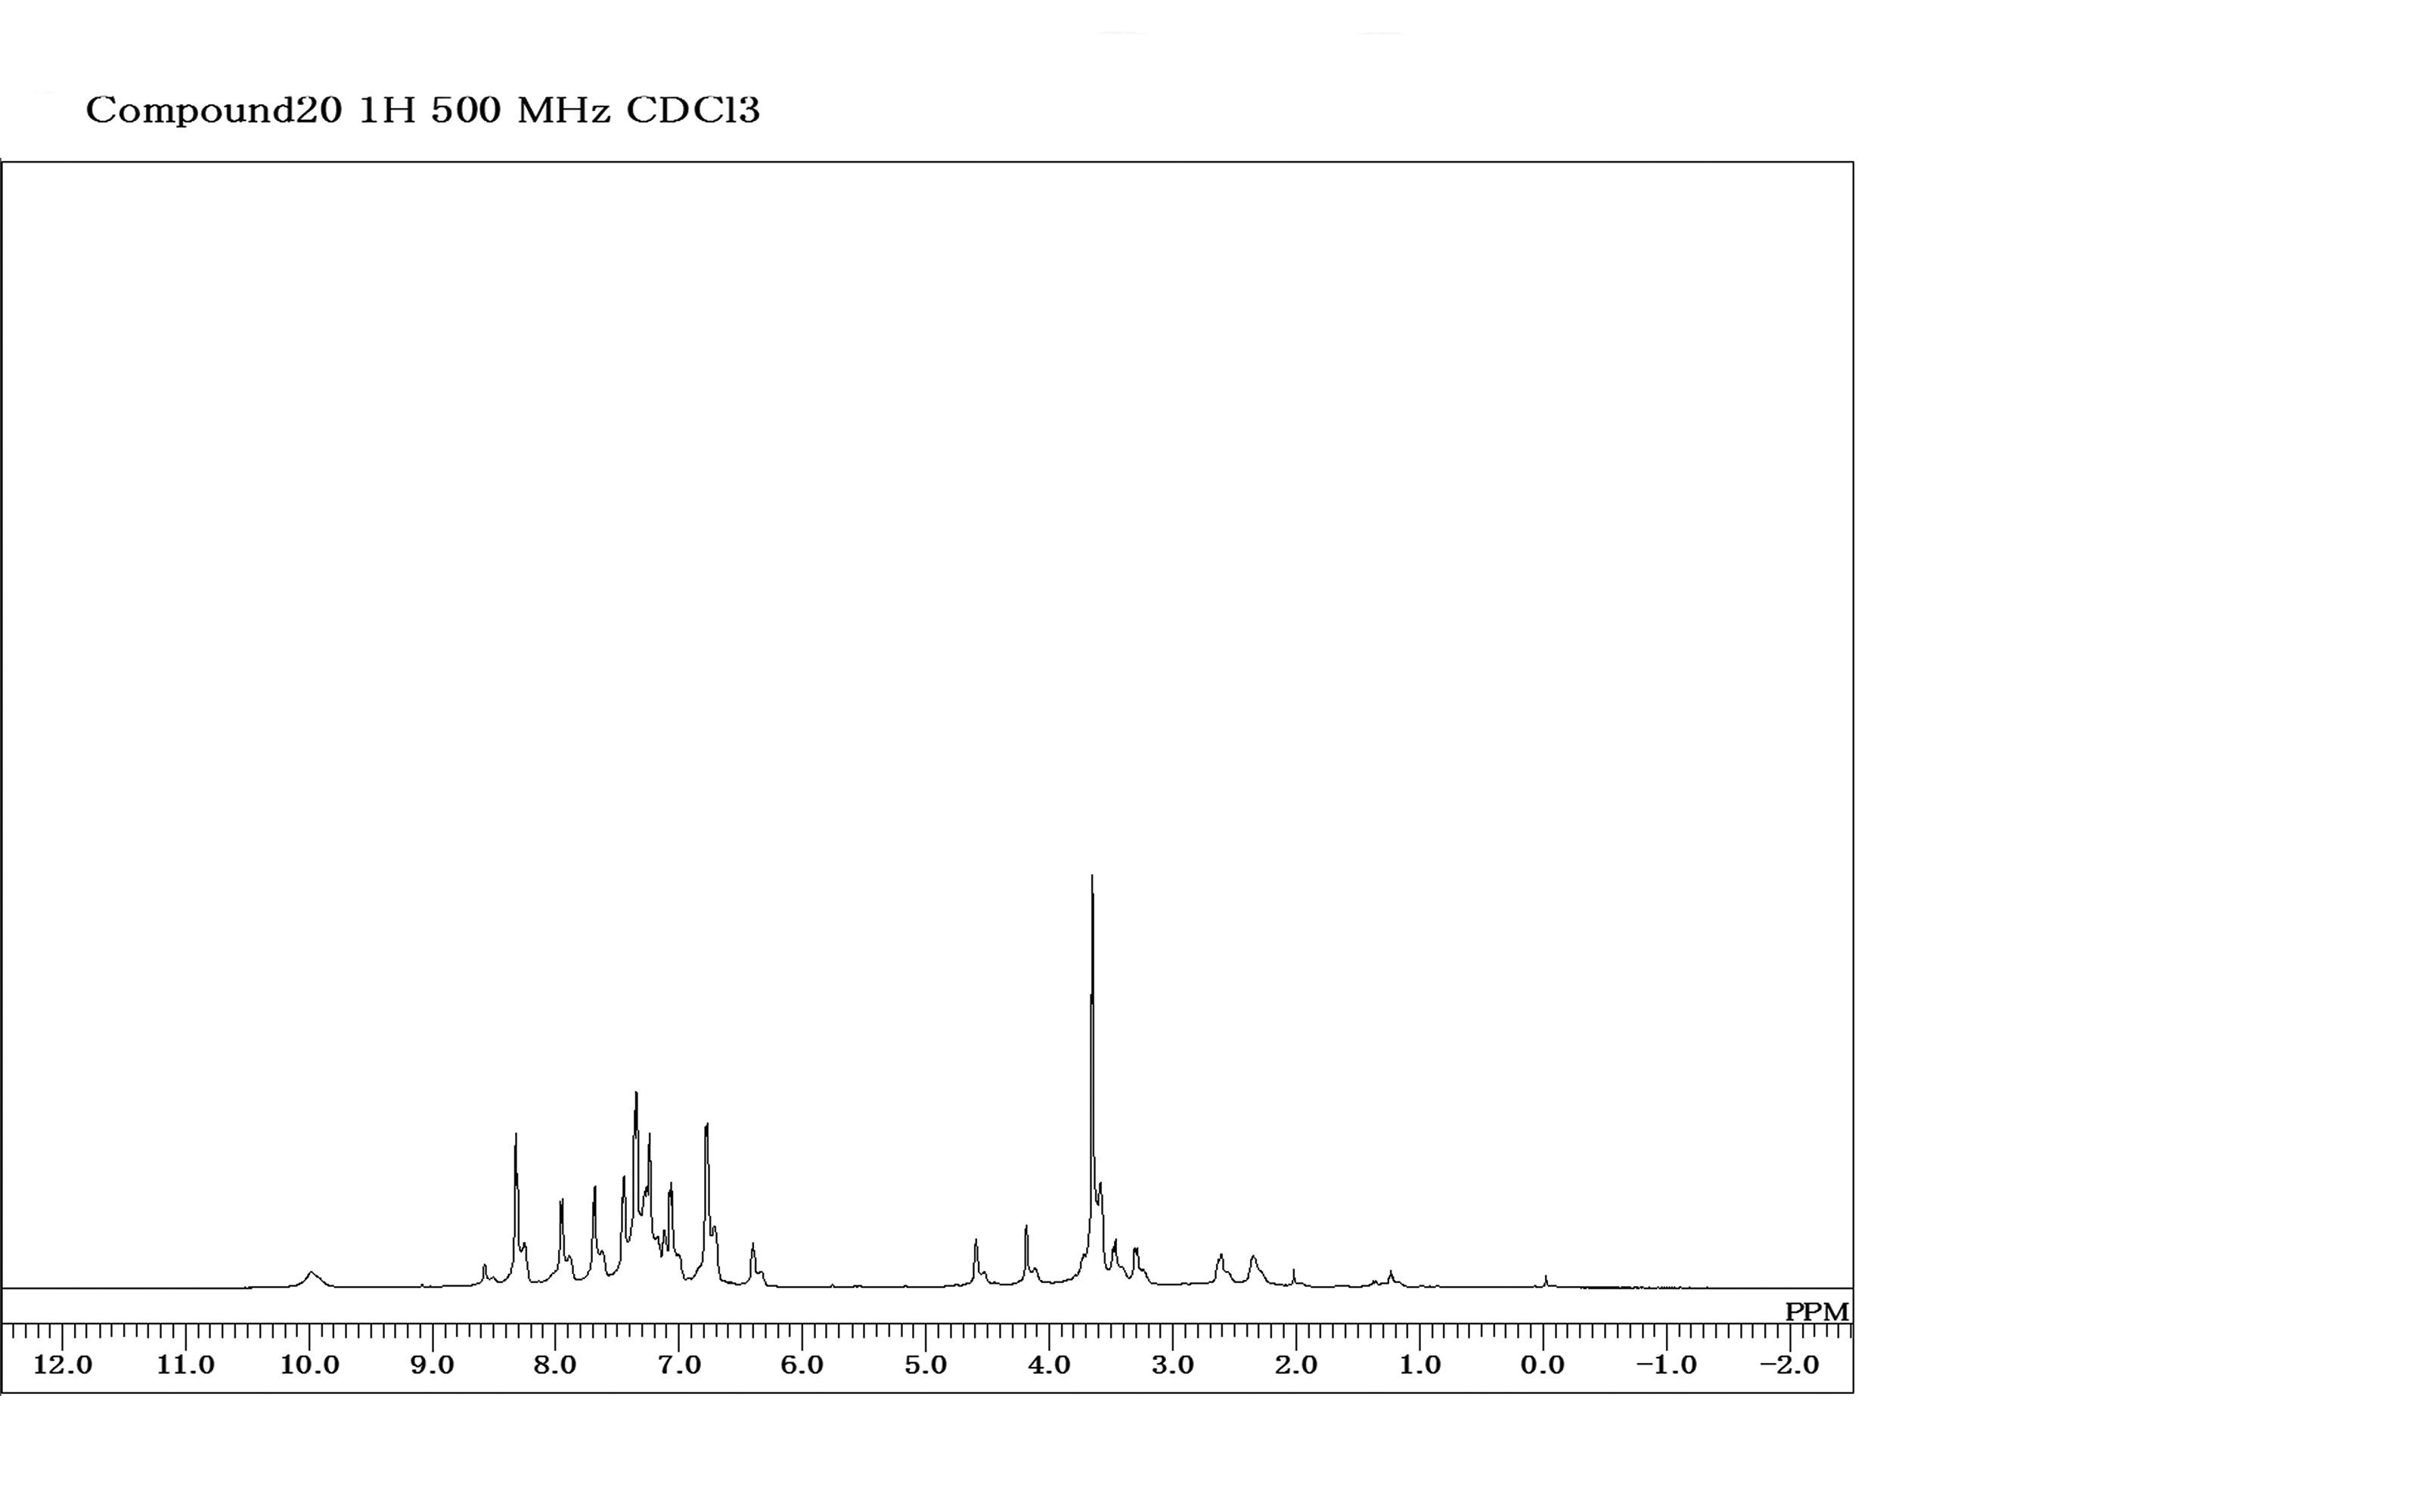


**Figure S27.** 1H-NMR spectrum of compound 20.


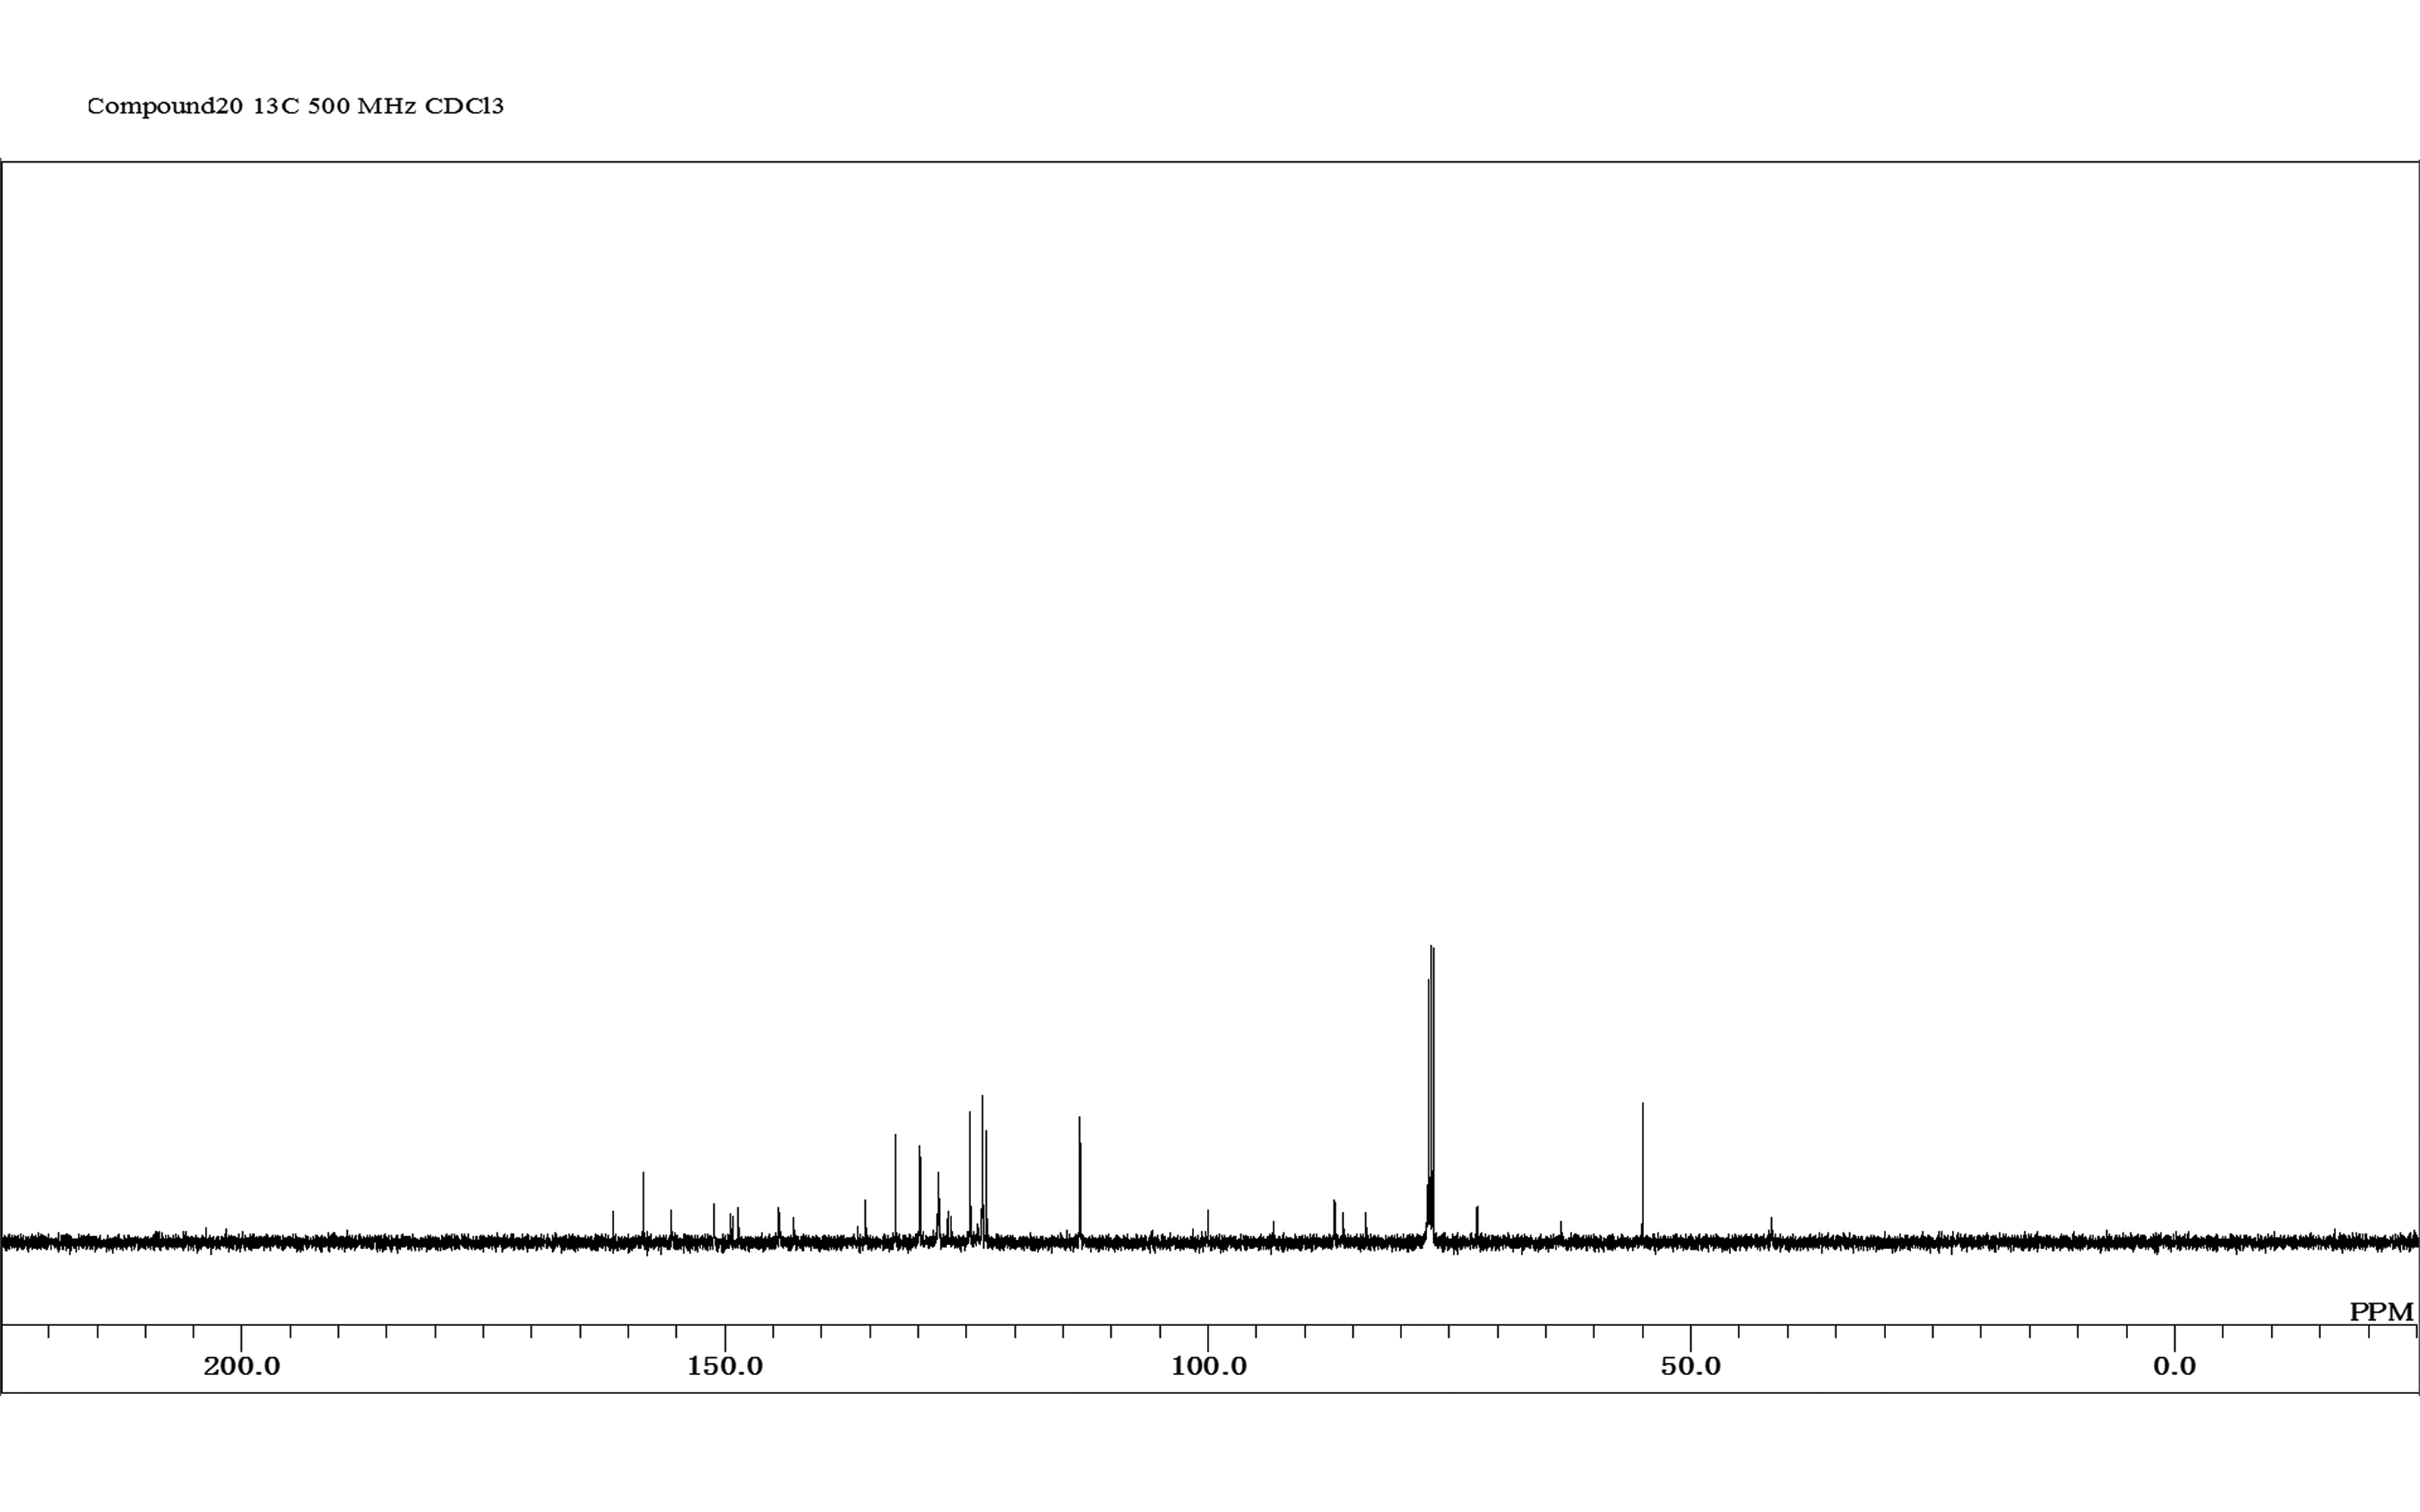


**Figure S28.** 13C-NMR spectrum of compound 20.


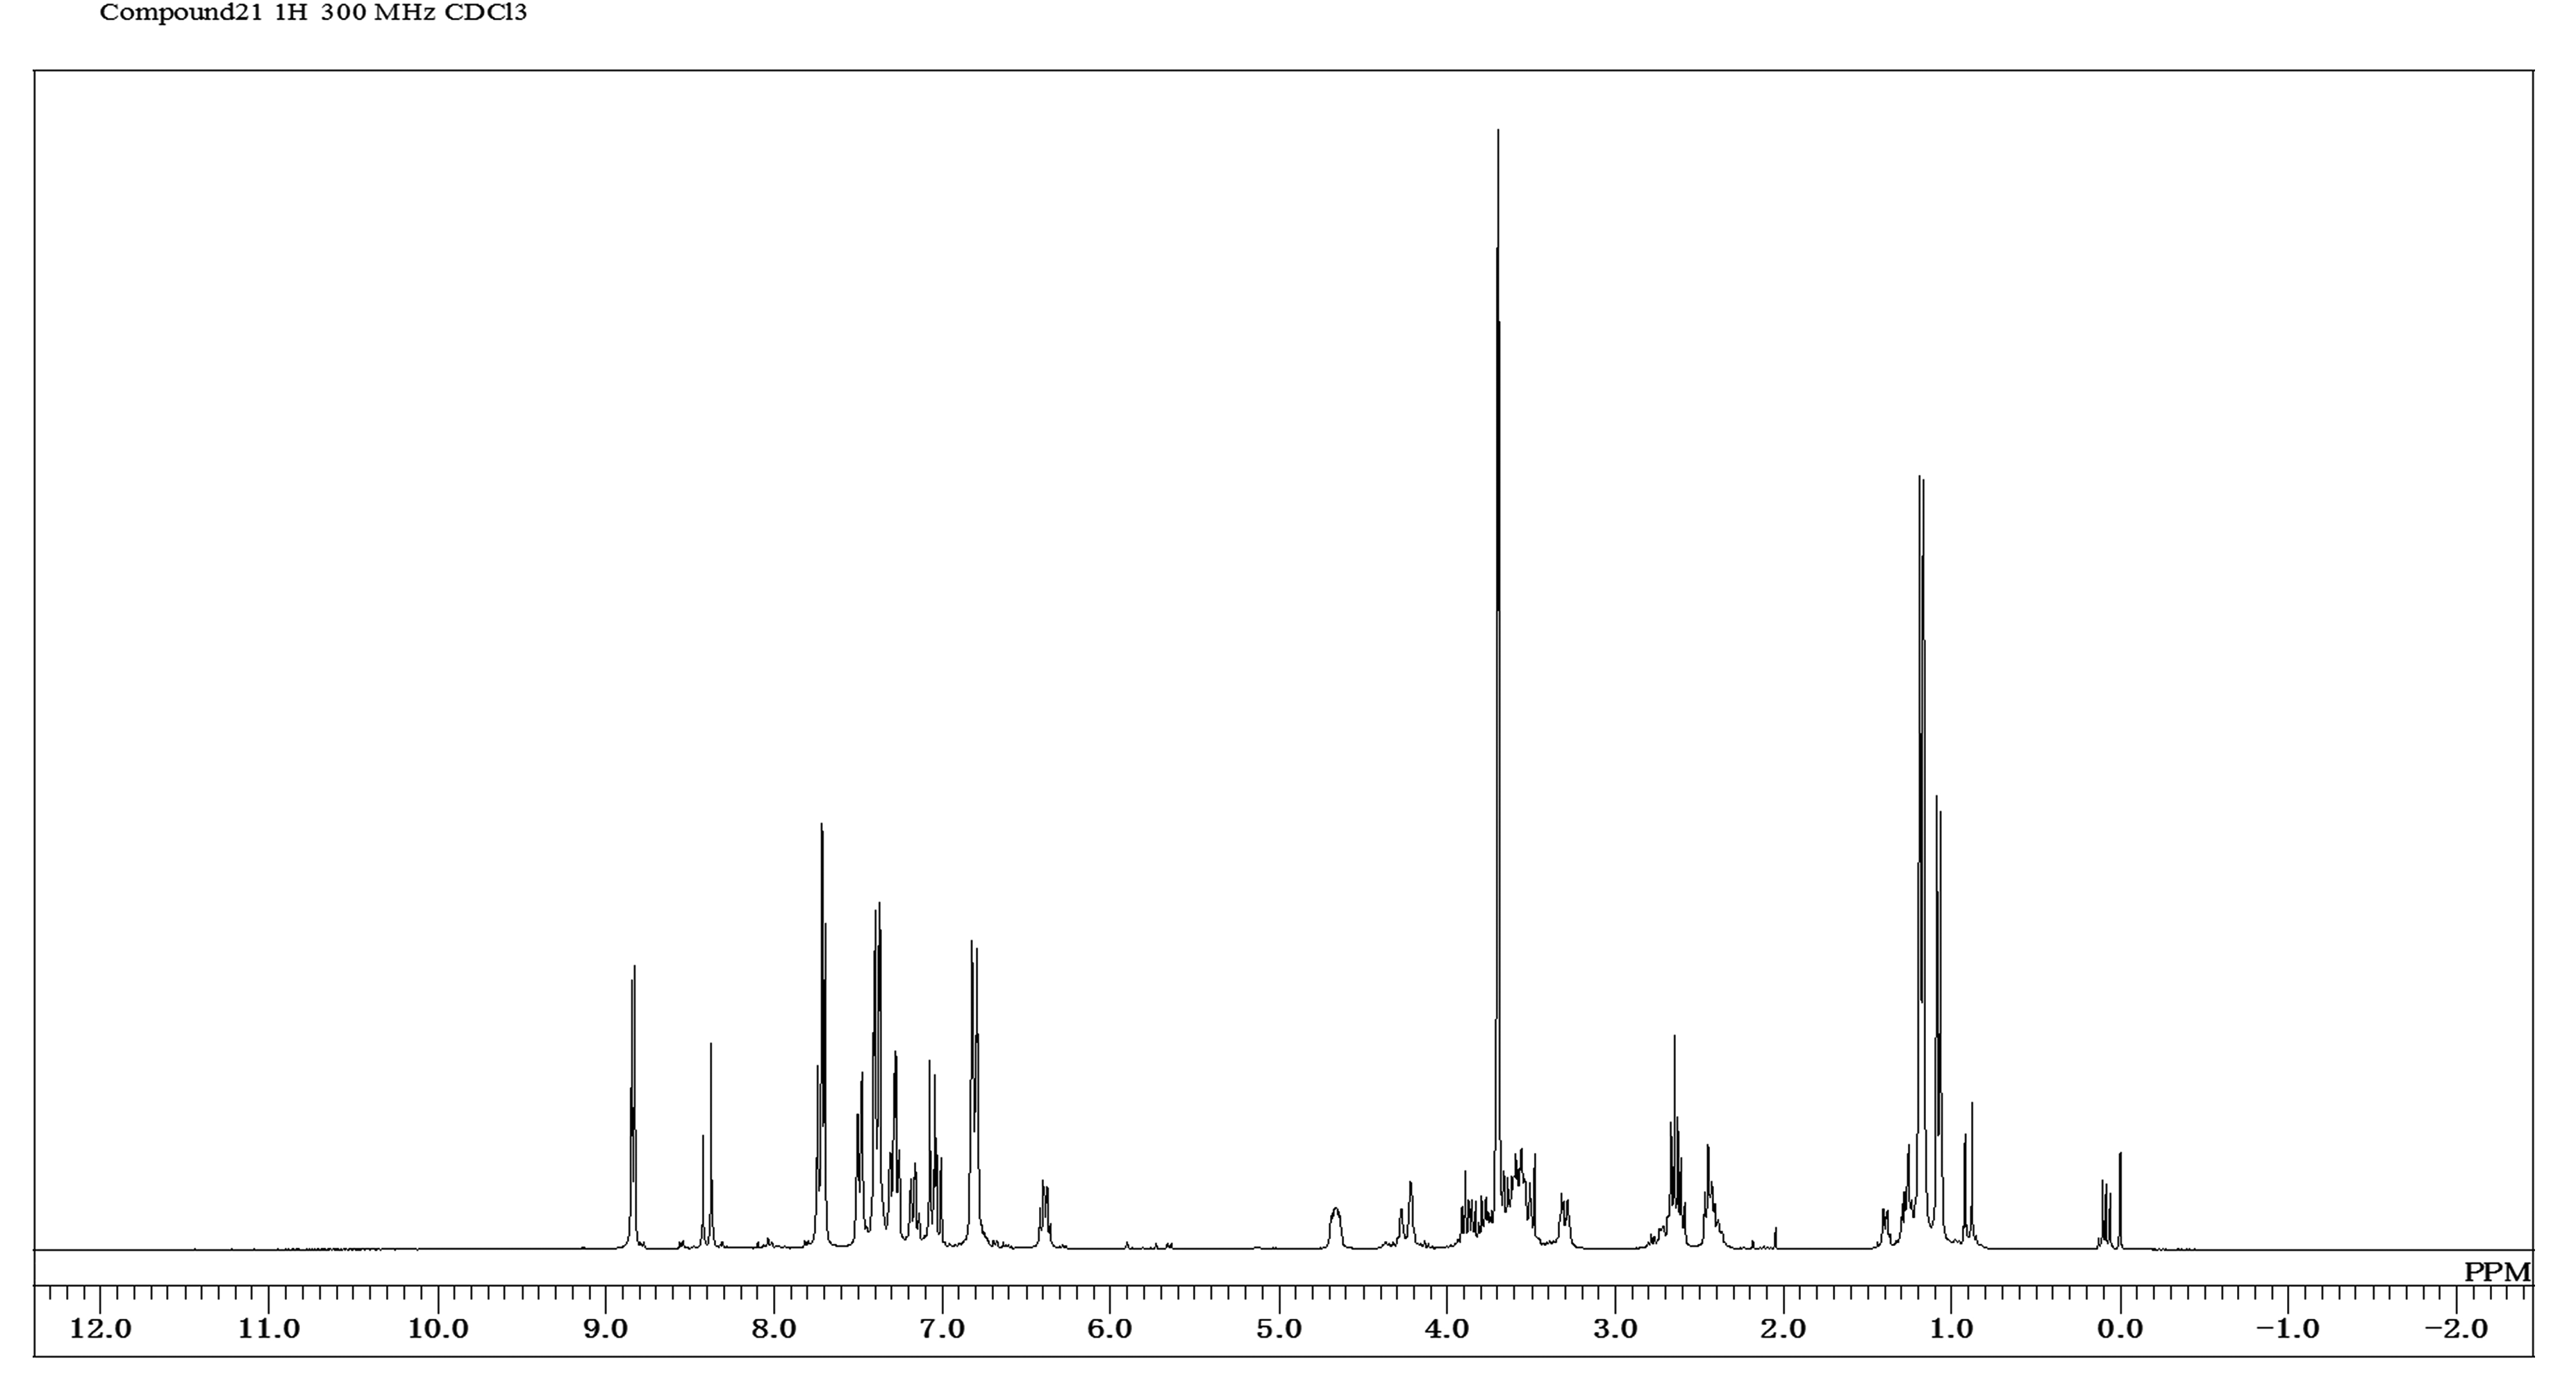


**Figure S29.** 1H-NMR spectrum of compound 21.


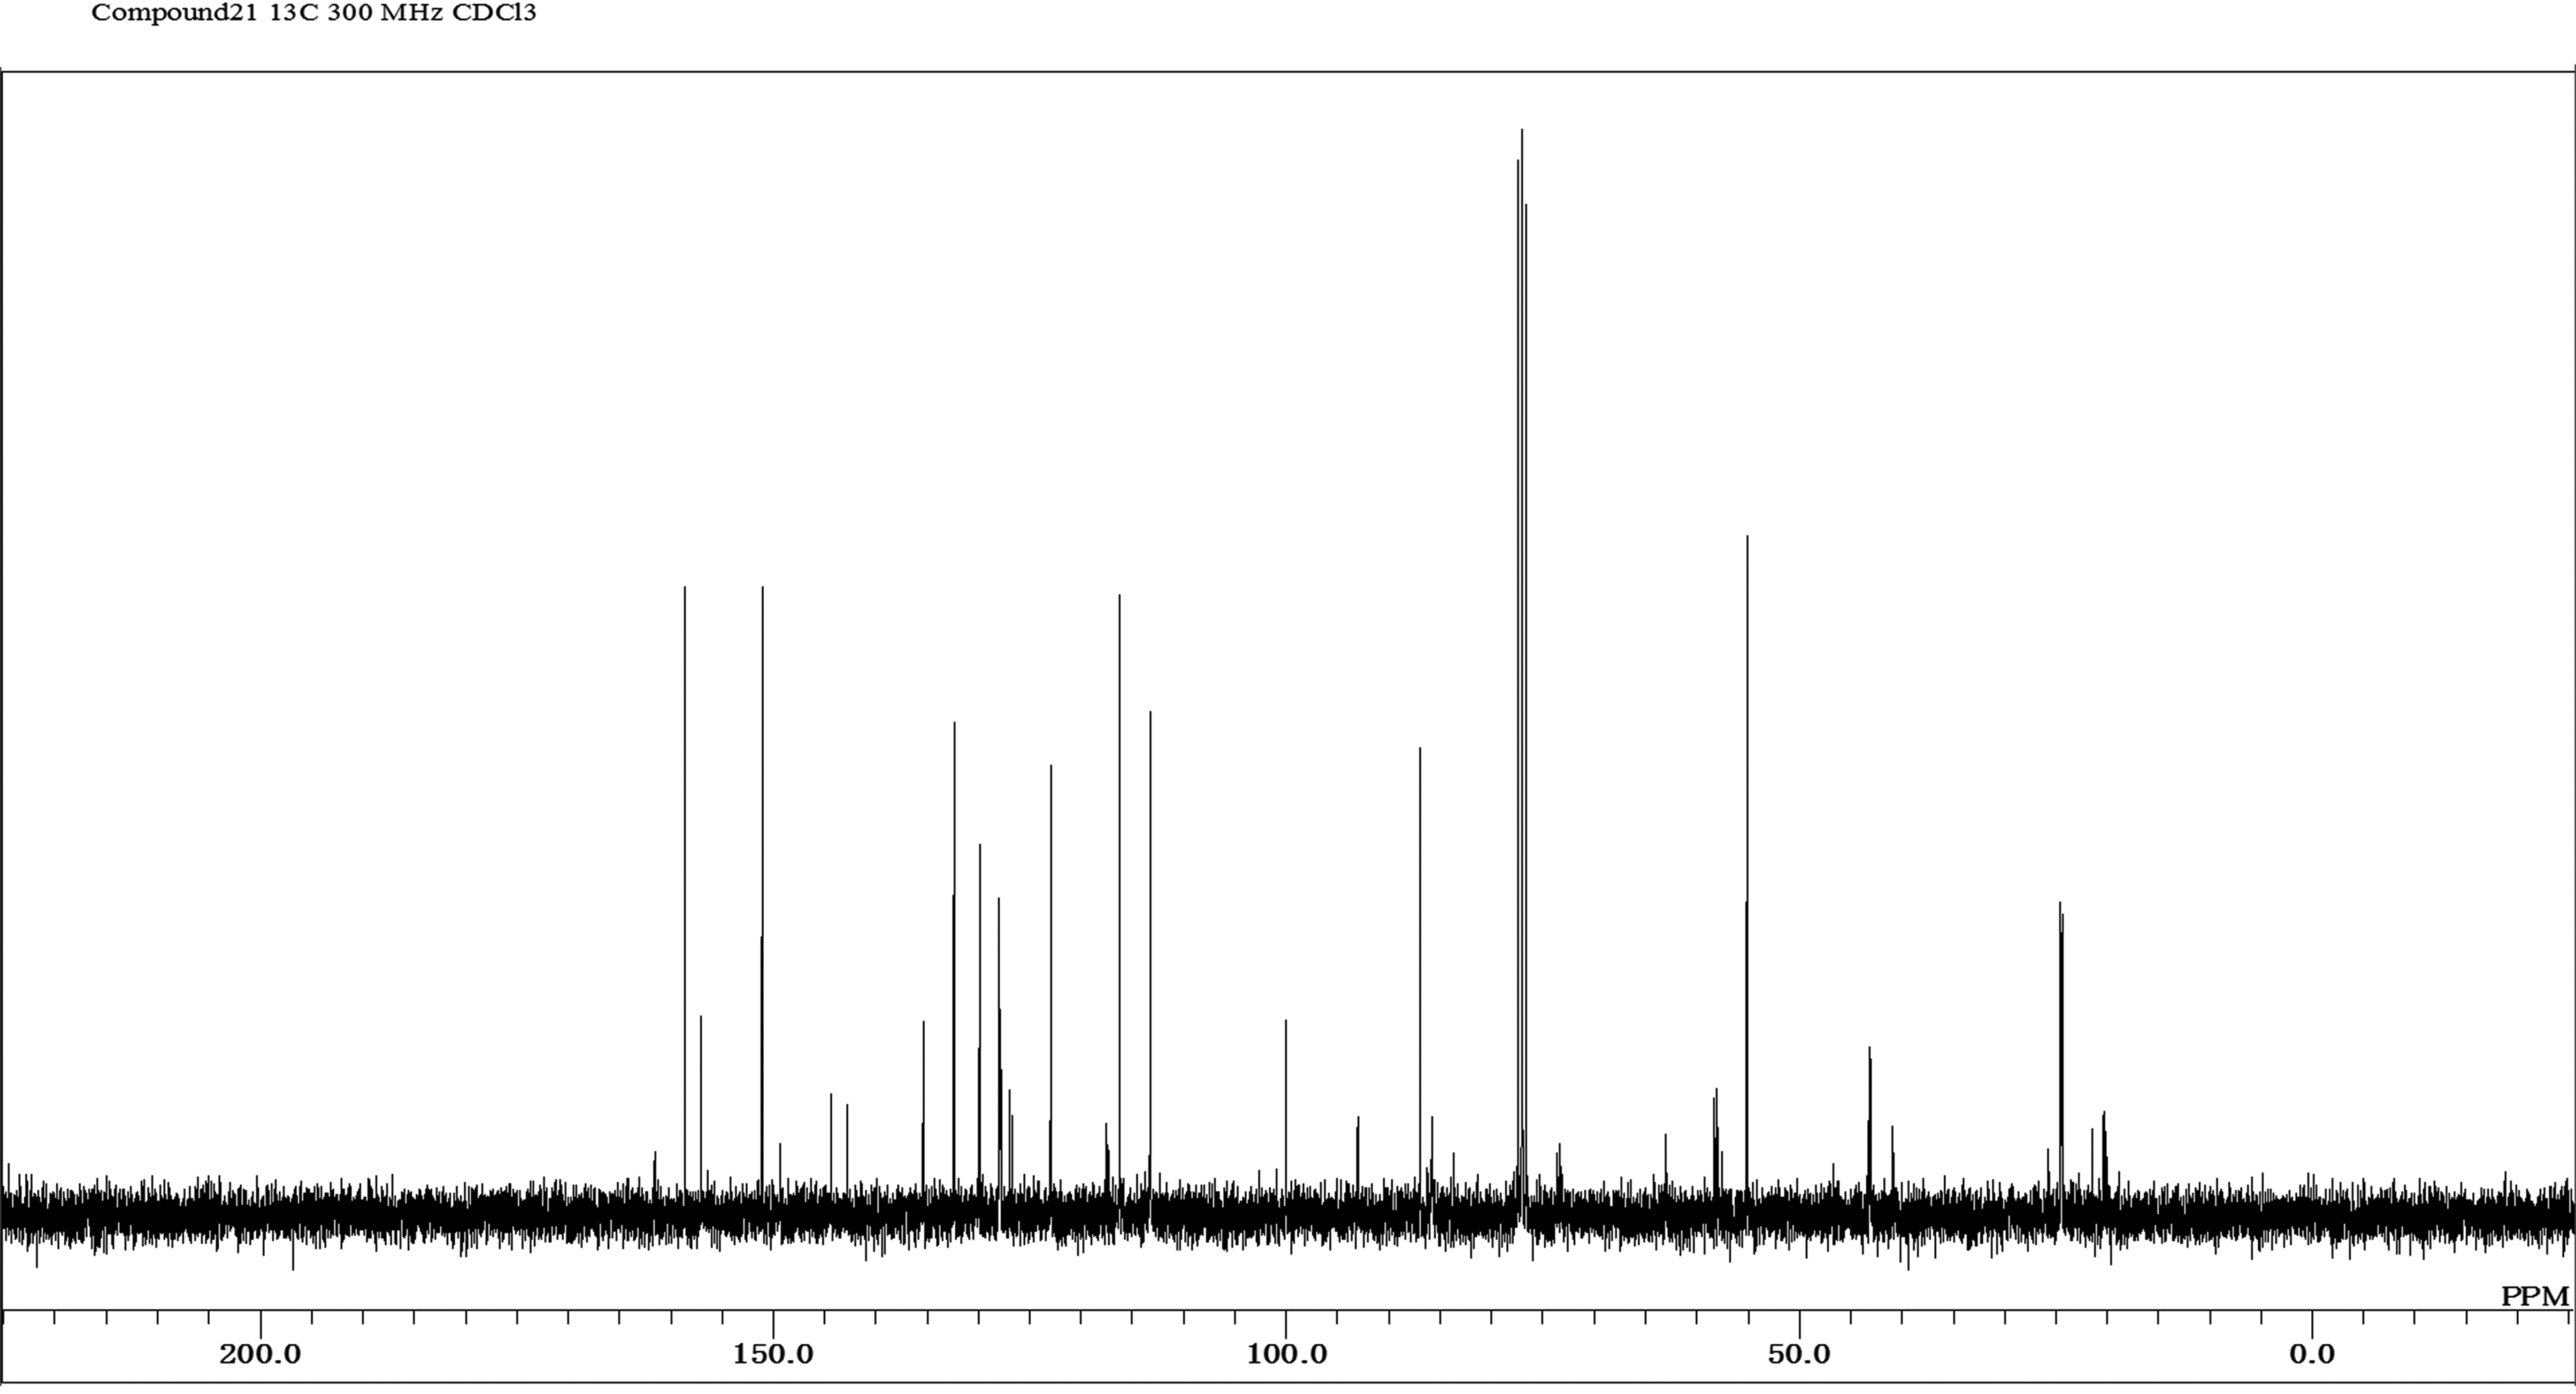


**Figure S30.** 13C-NMR spectrum of compound 21.


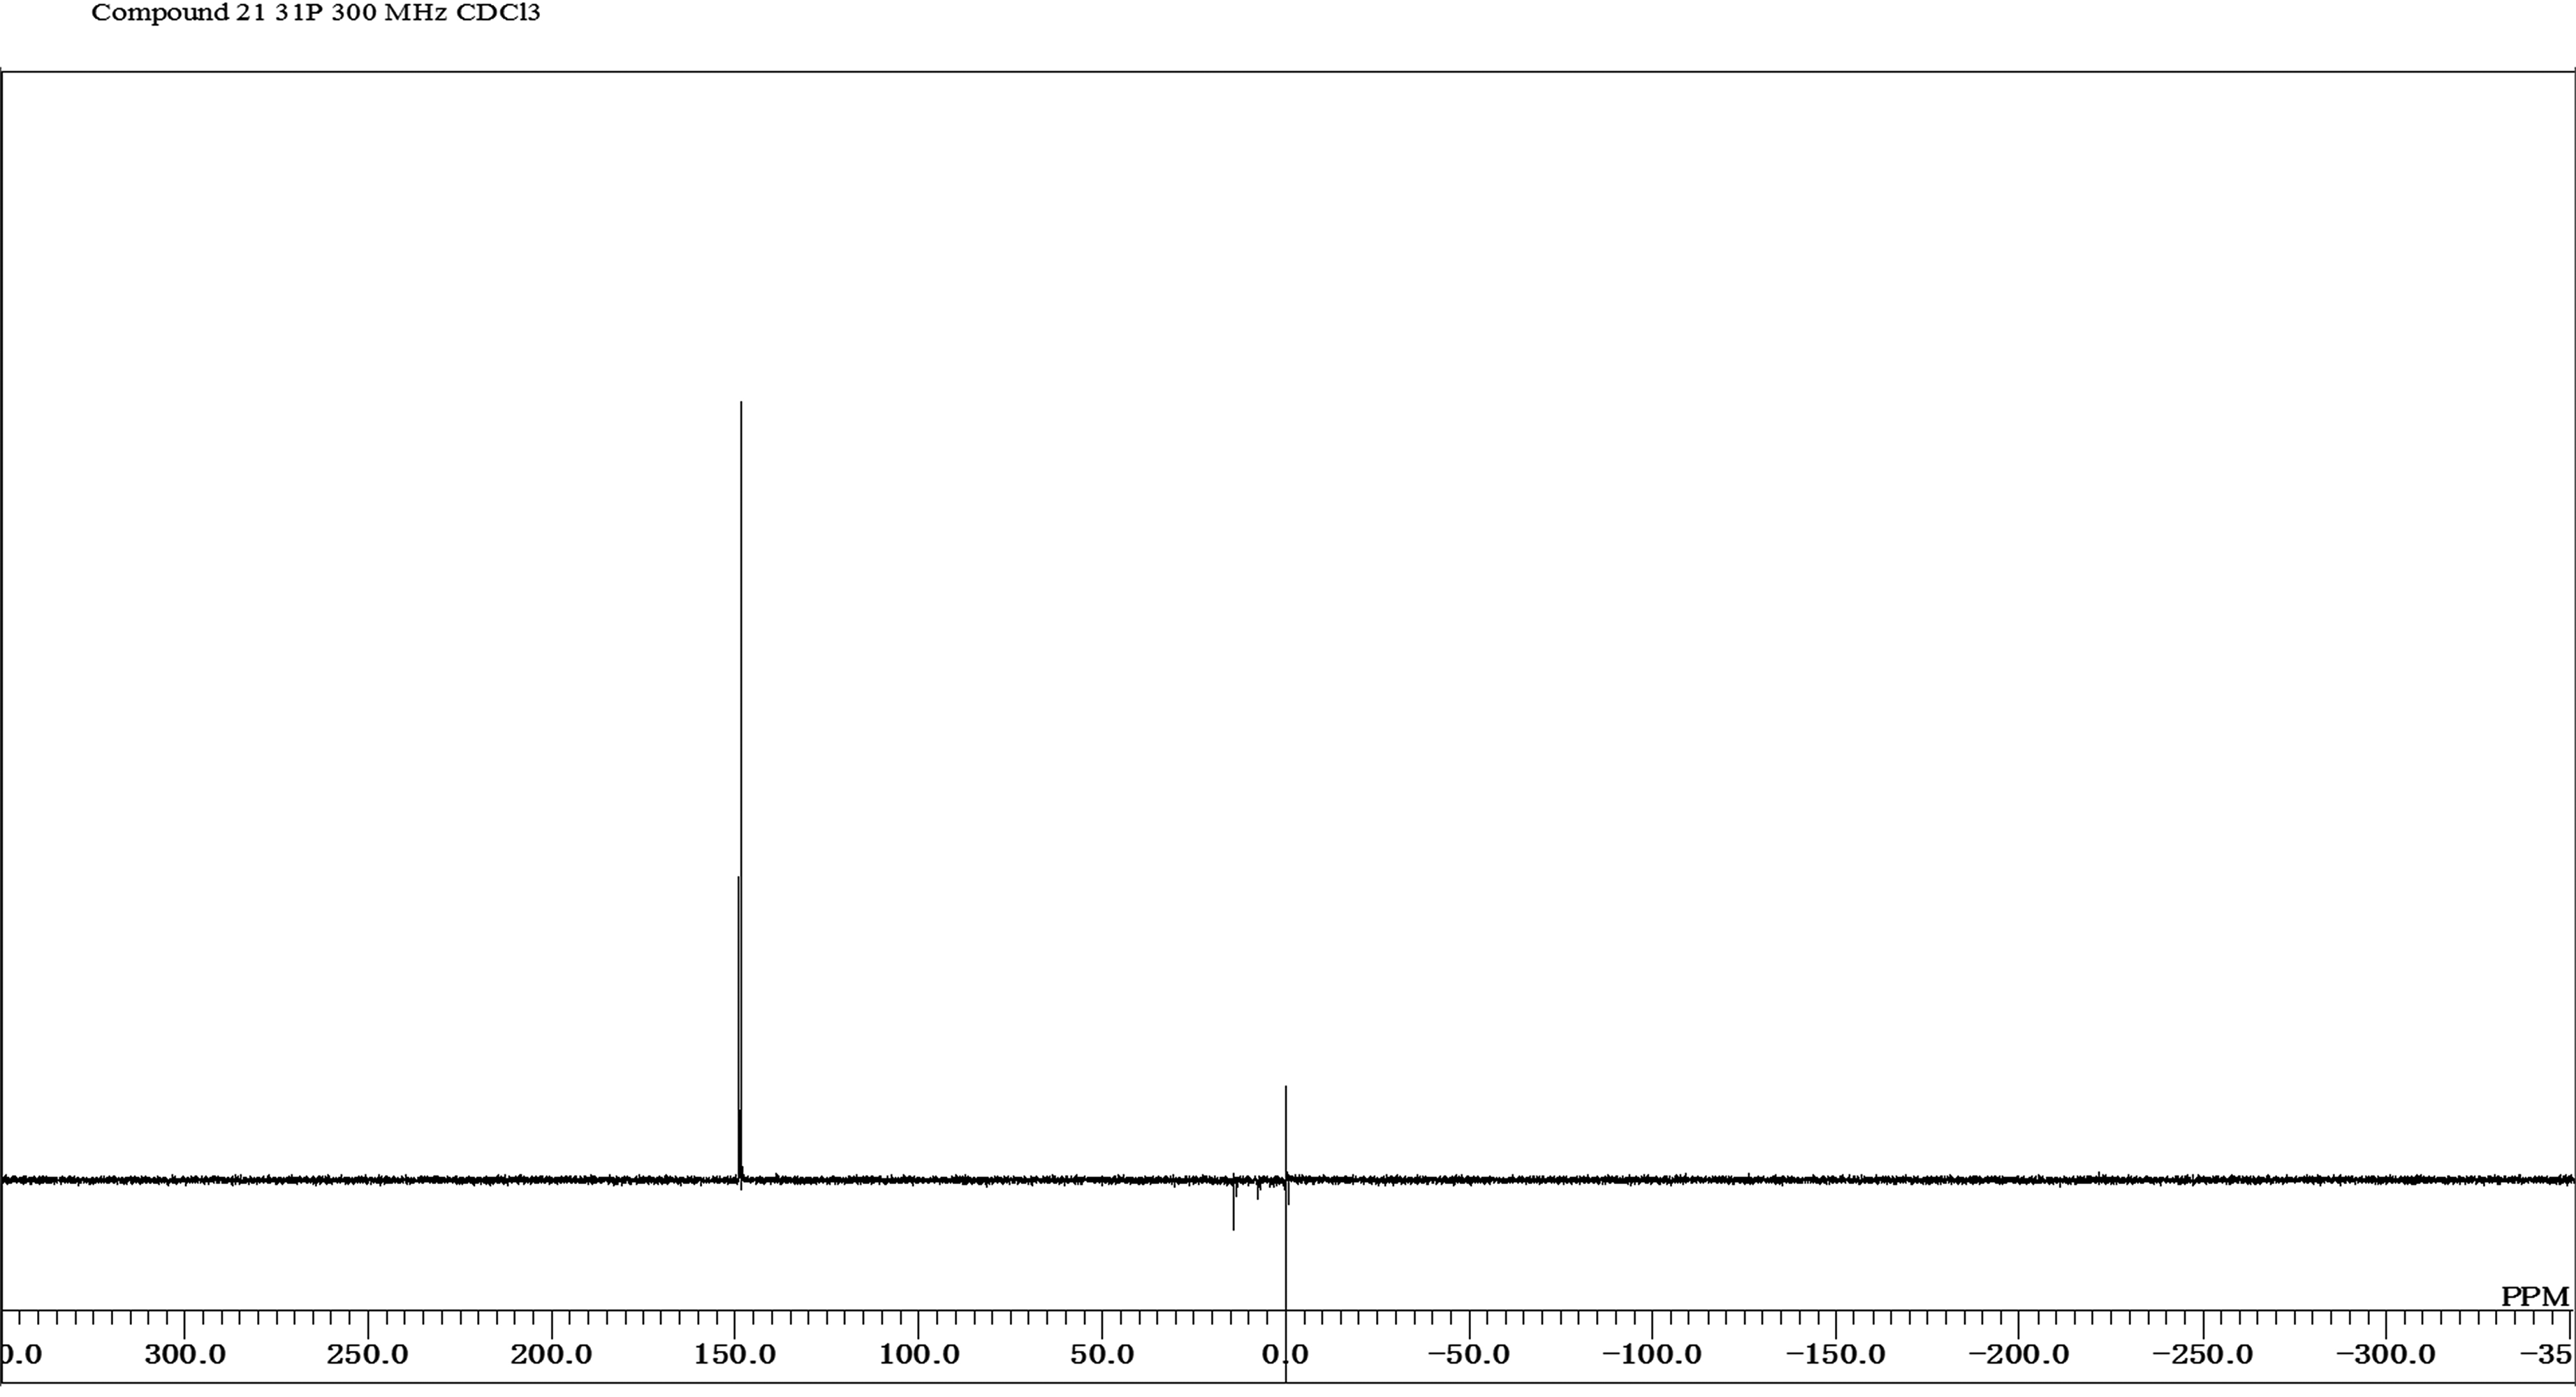


**Figure S31.** 31P-NMR spectrum of compound 21.


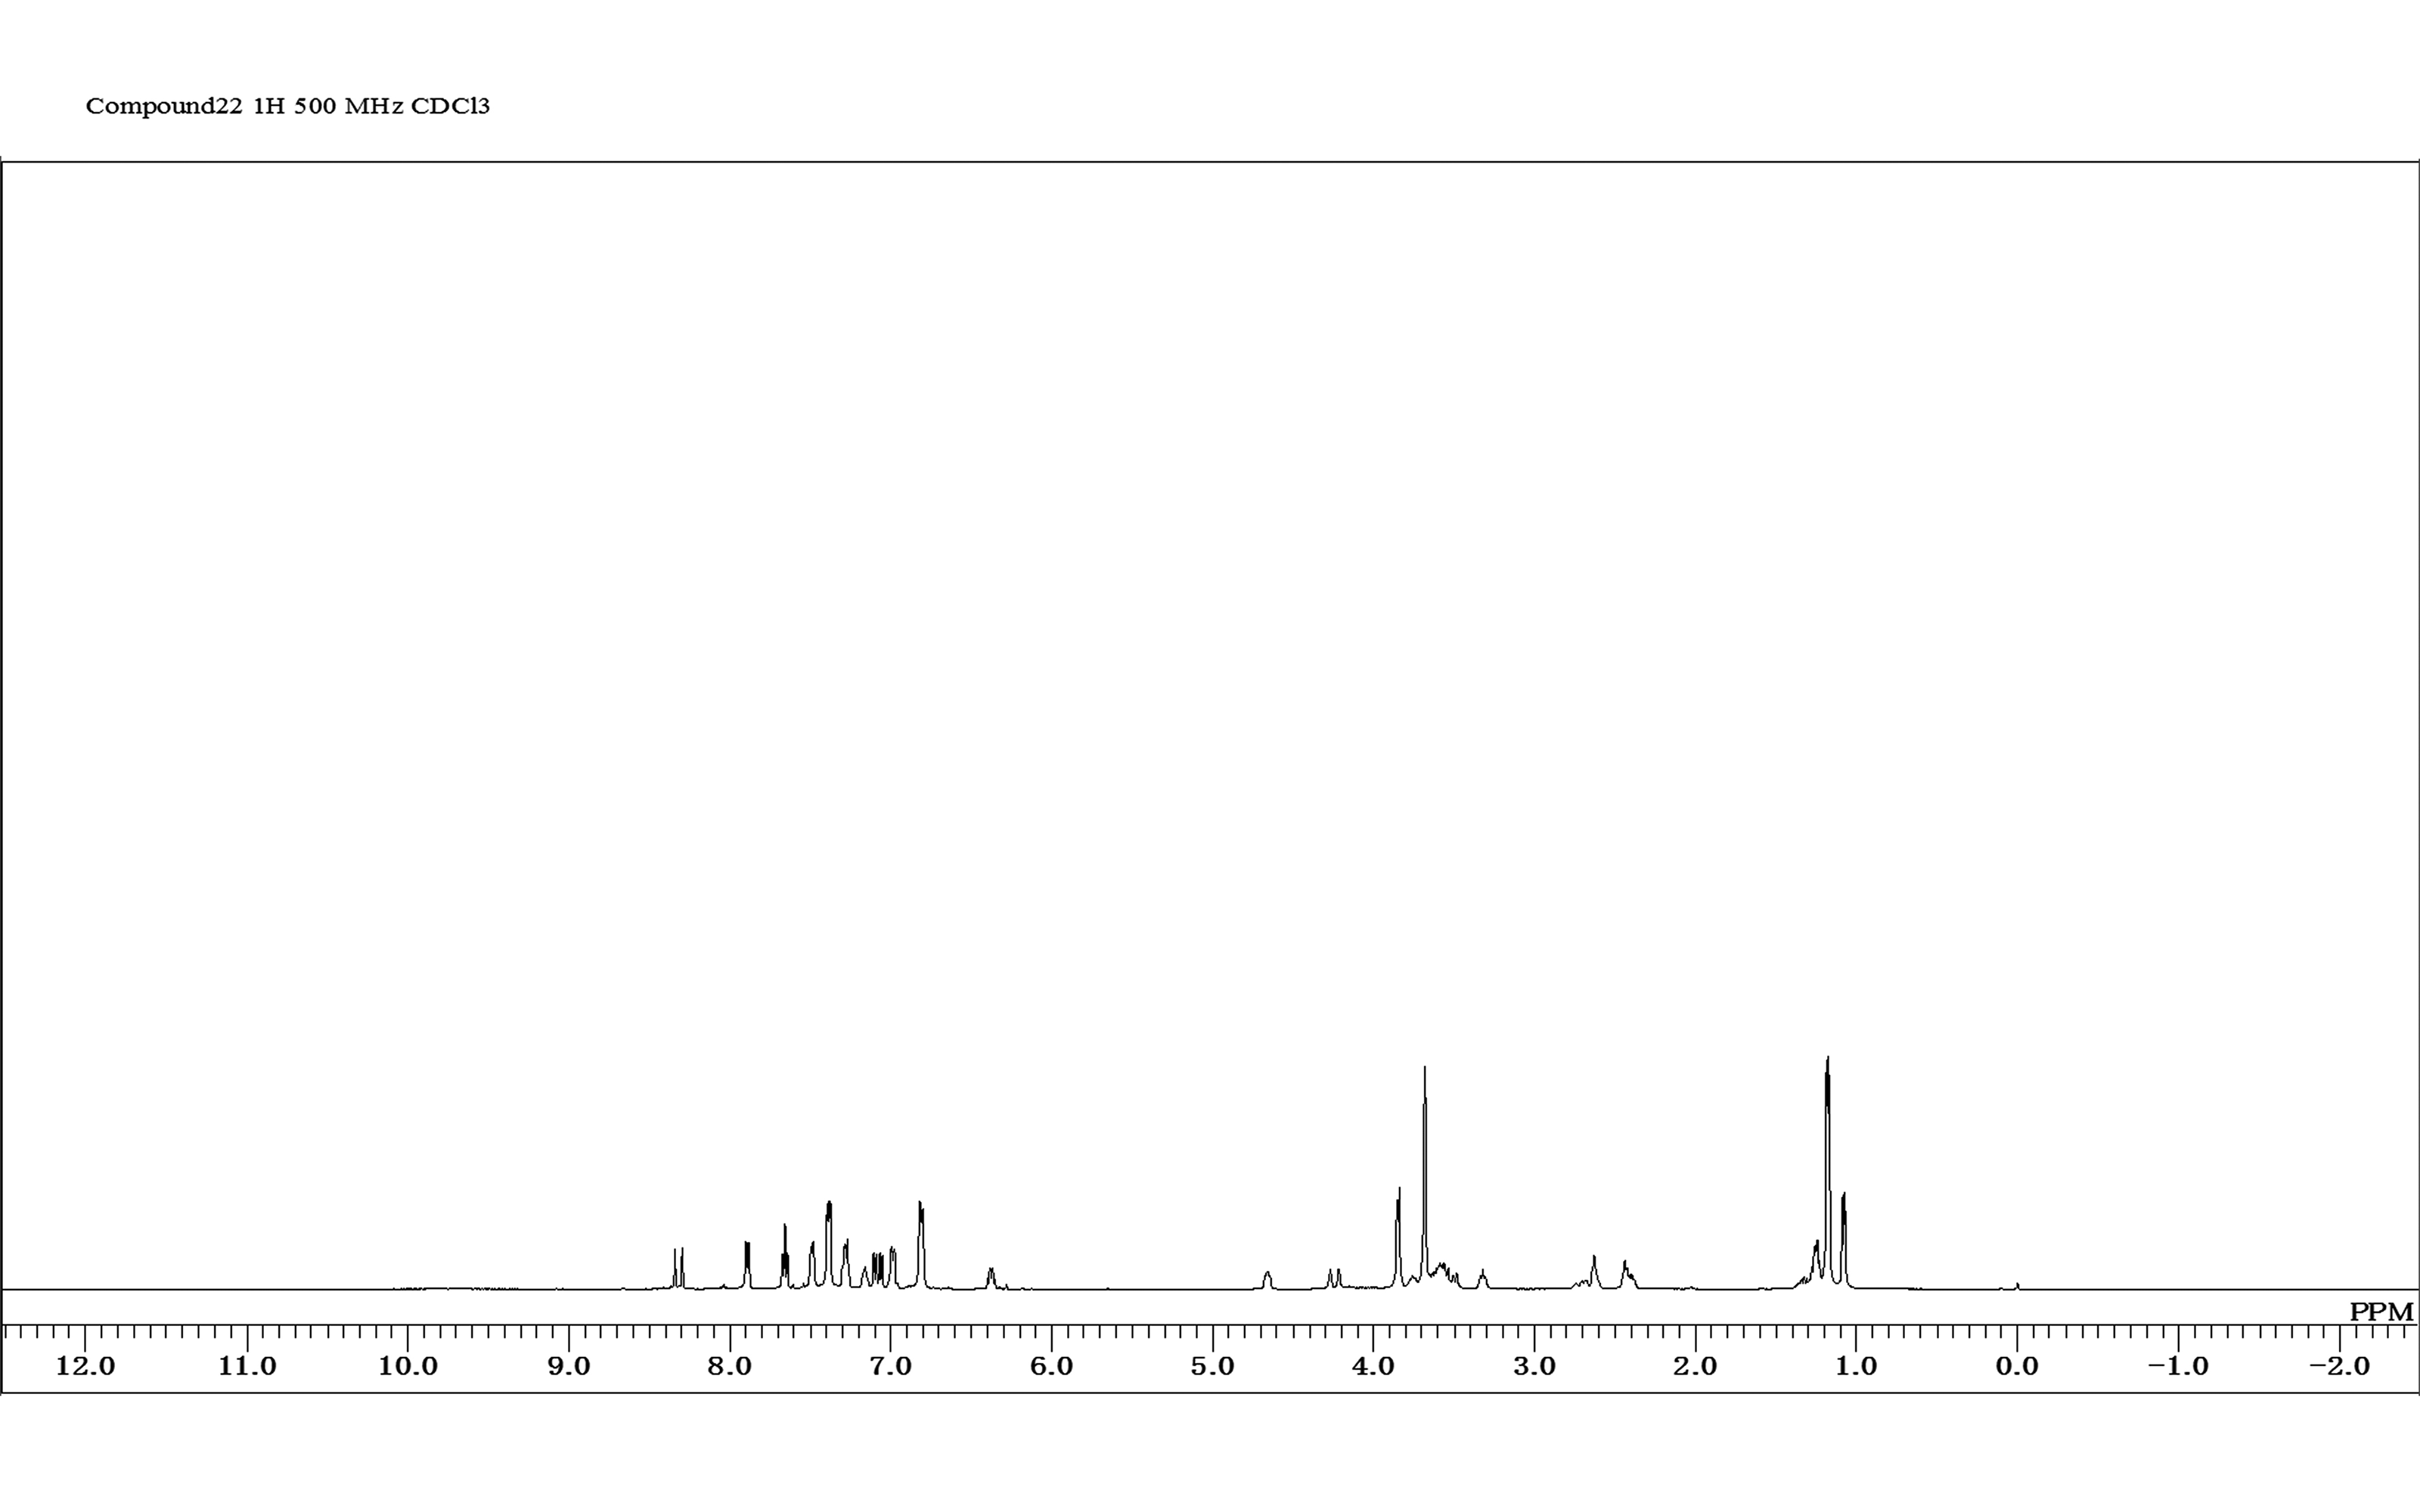


**Figure S32.** 1H-NMR spectrum of compound 22.


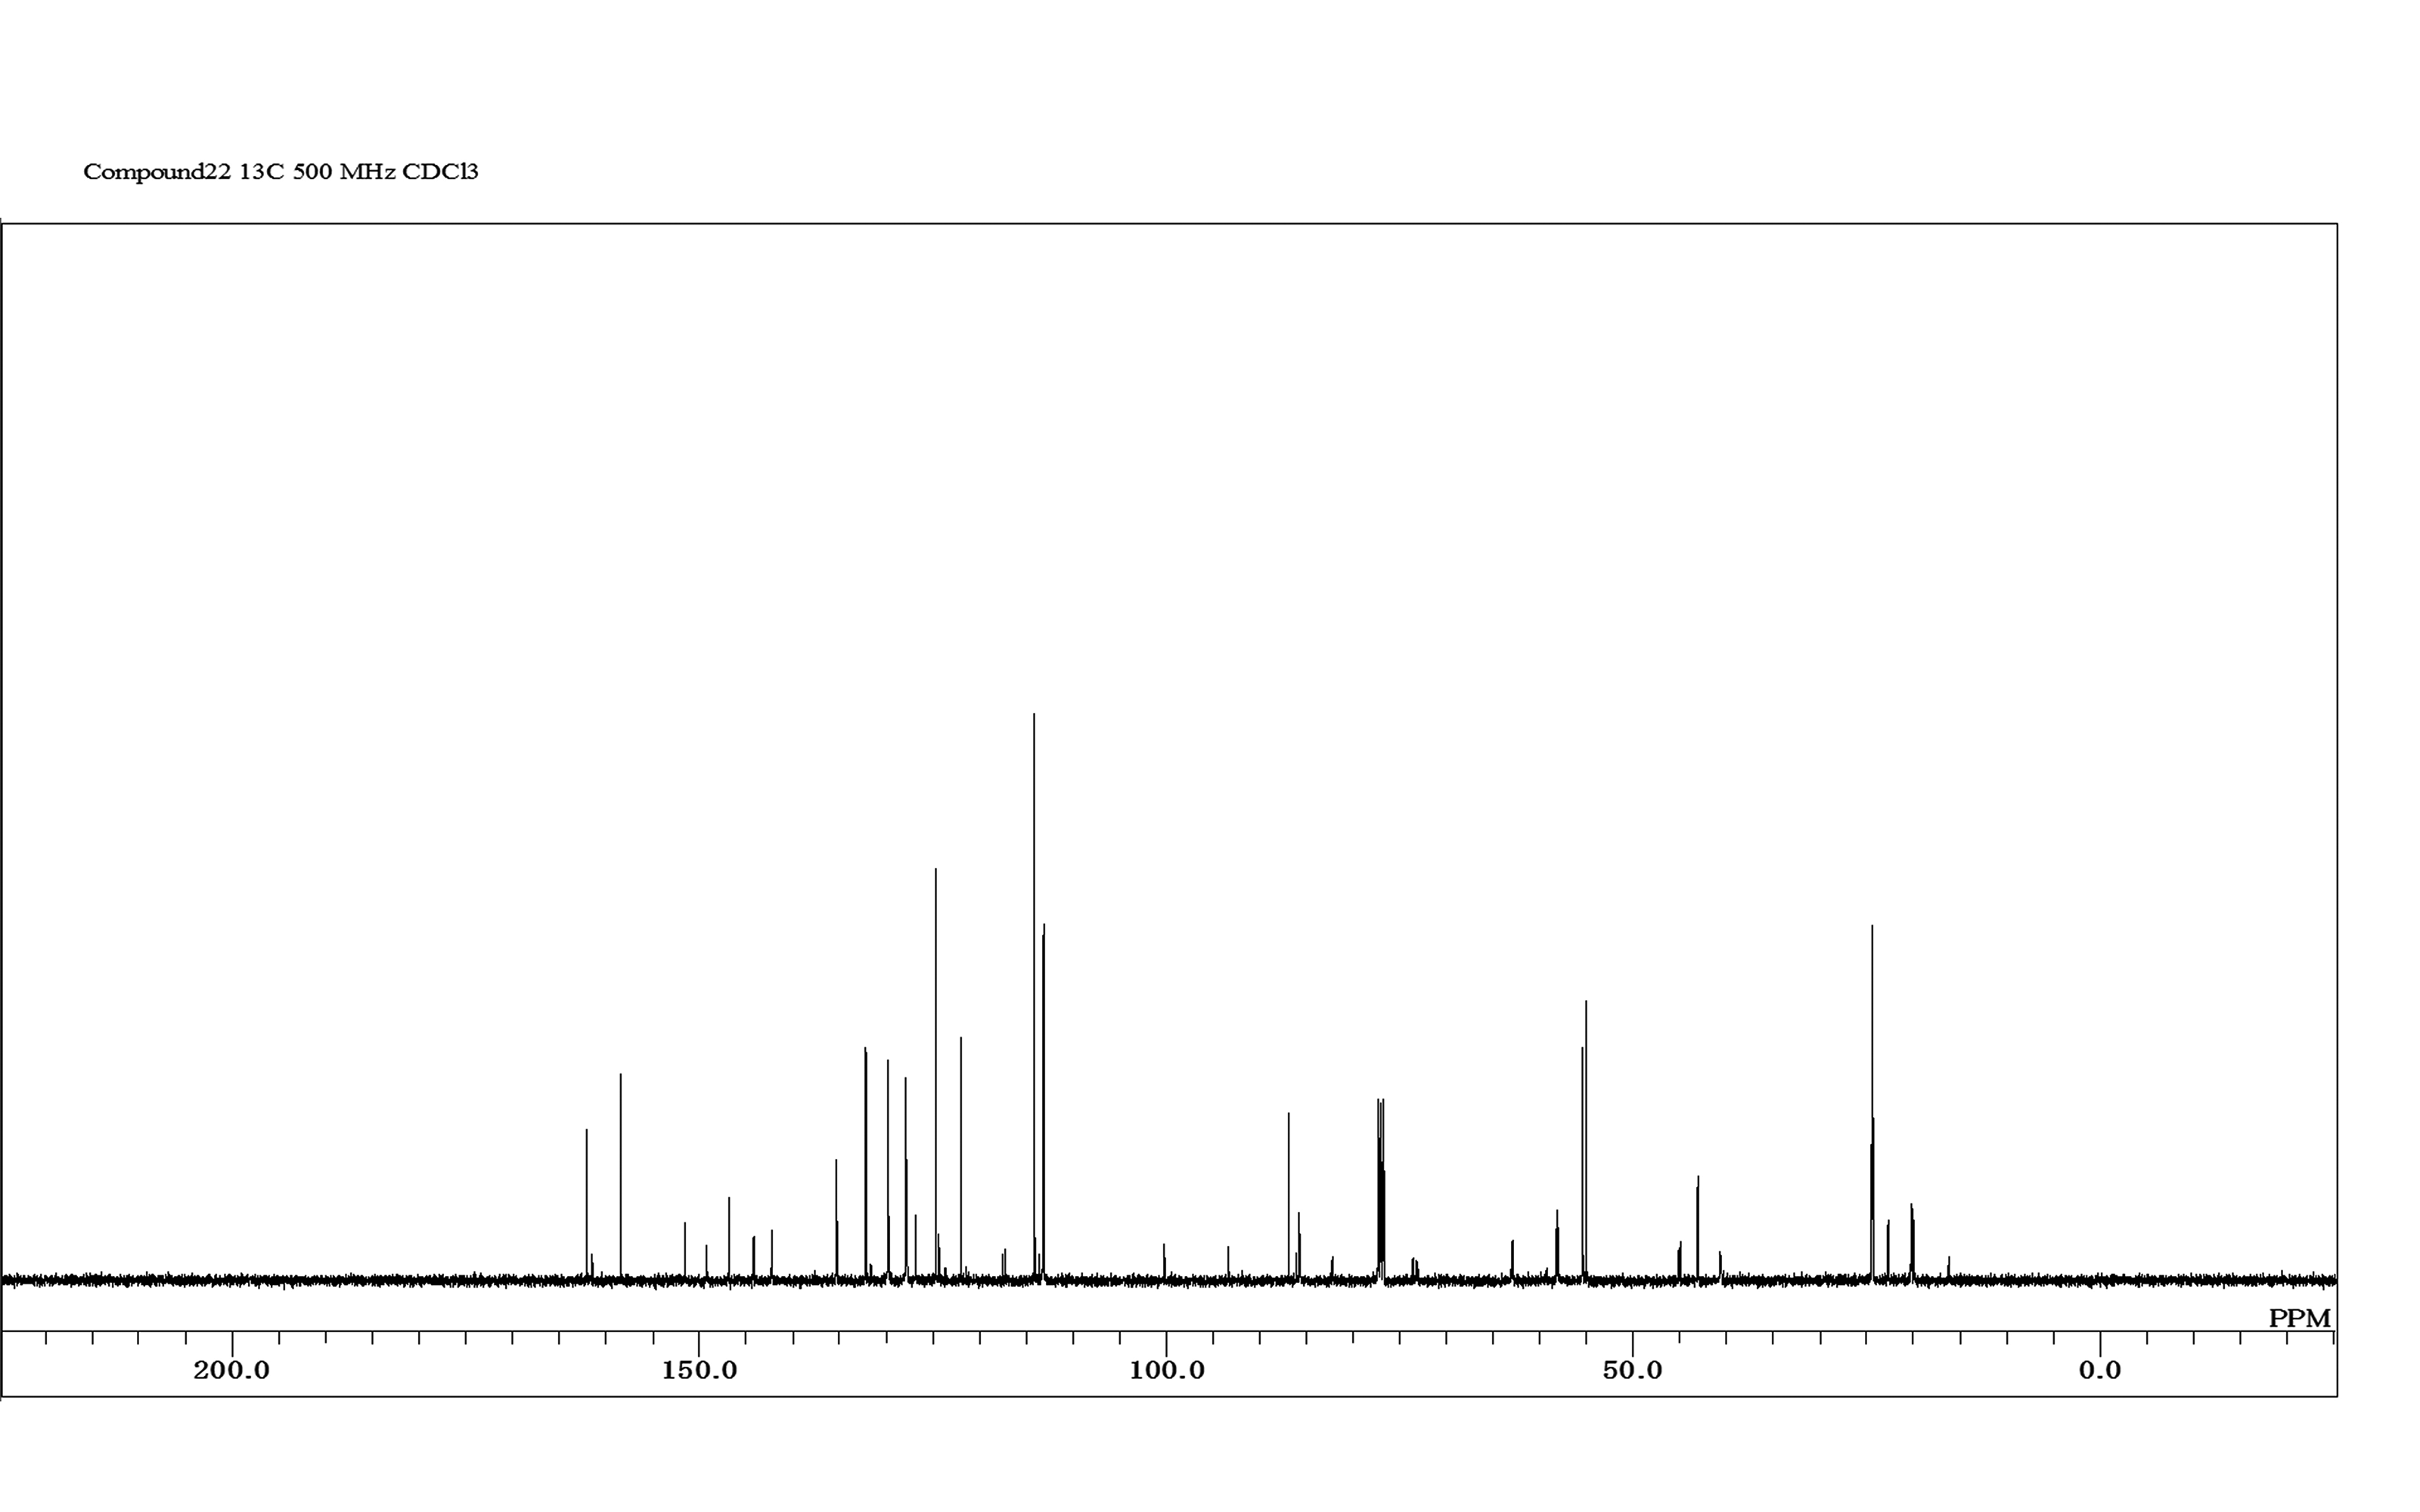


**Figure S33.** 13C-NMR spectrum of compound 22.


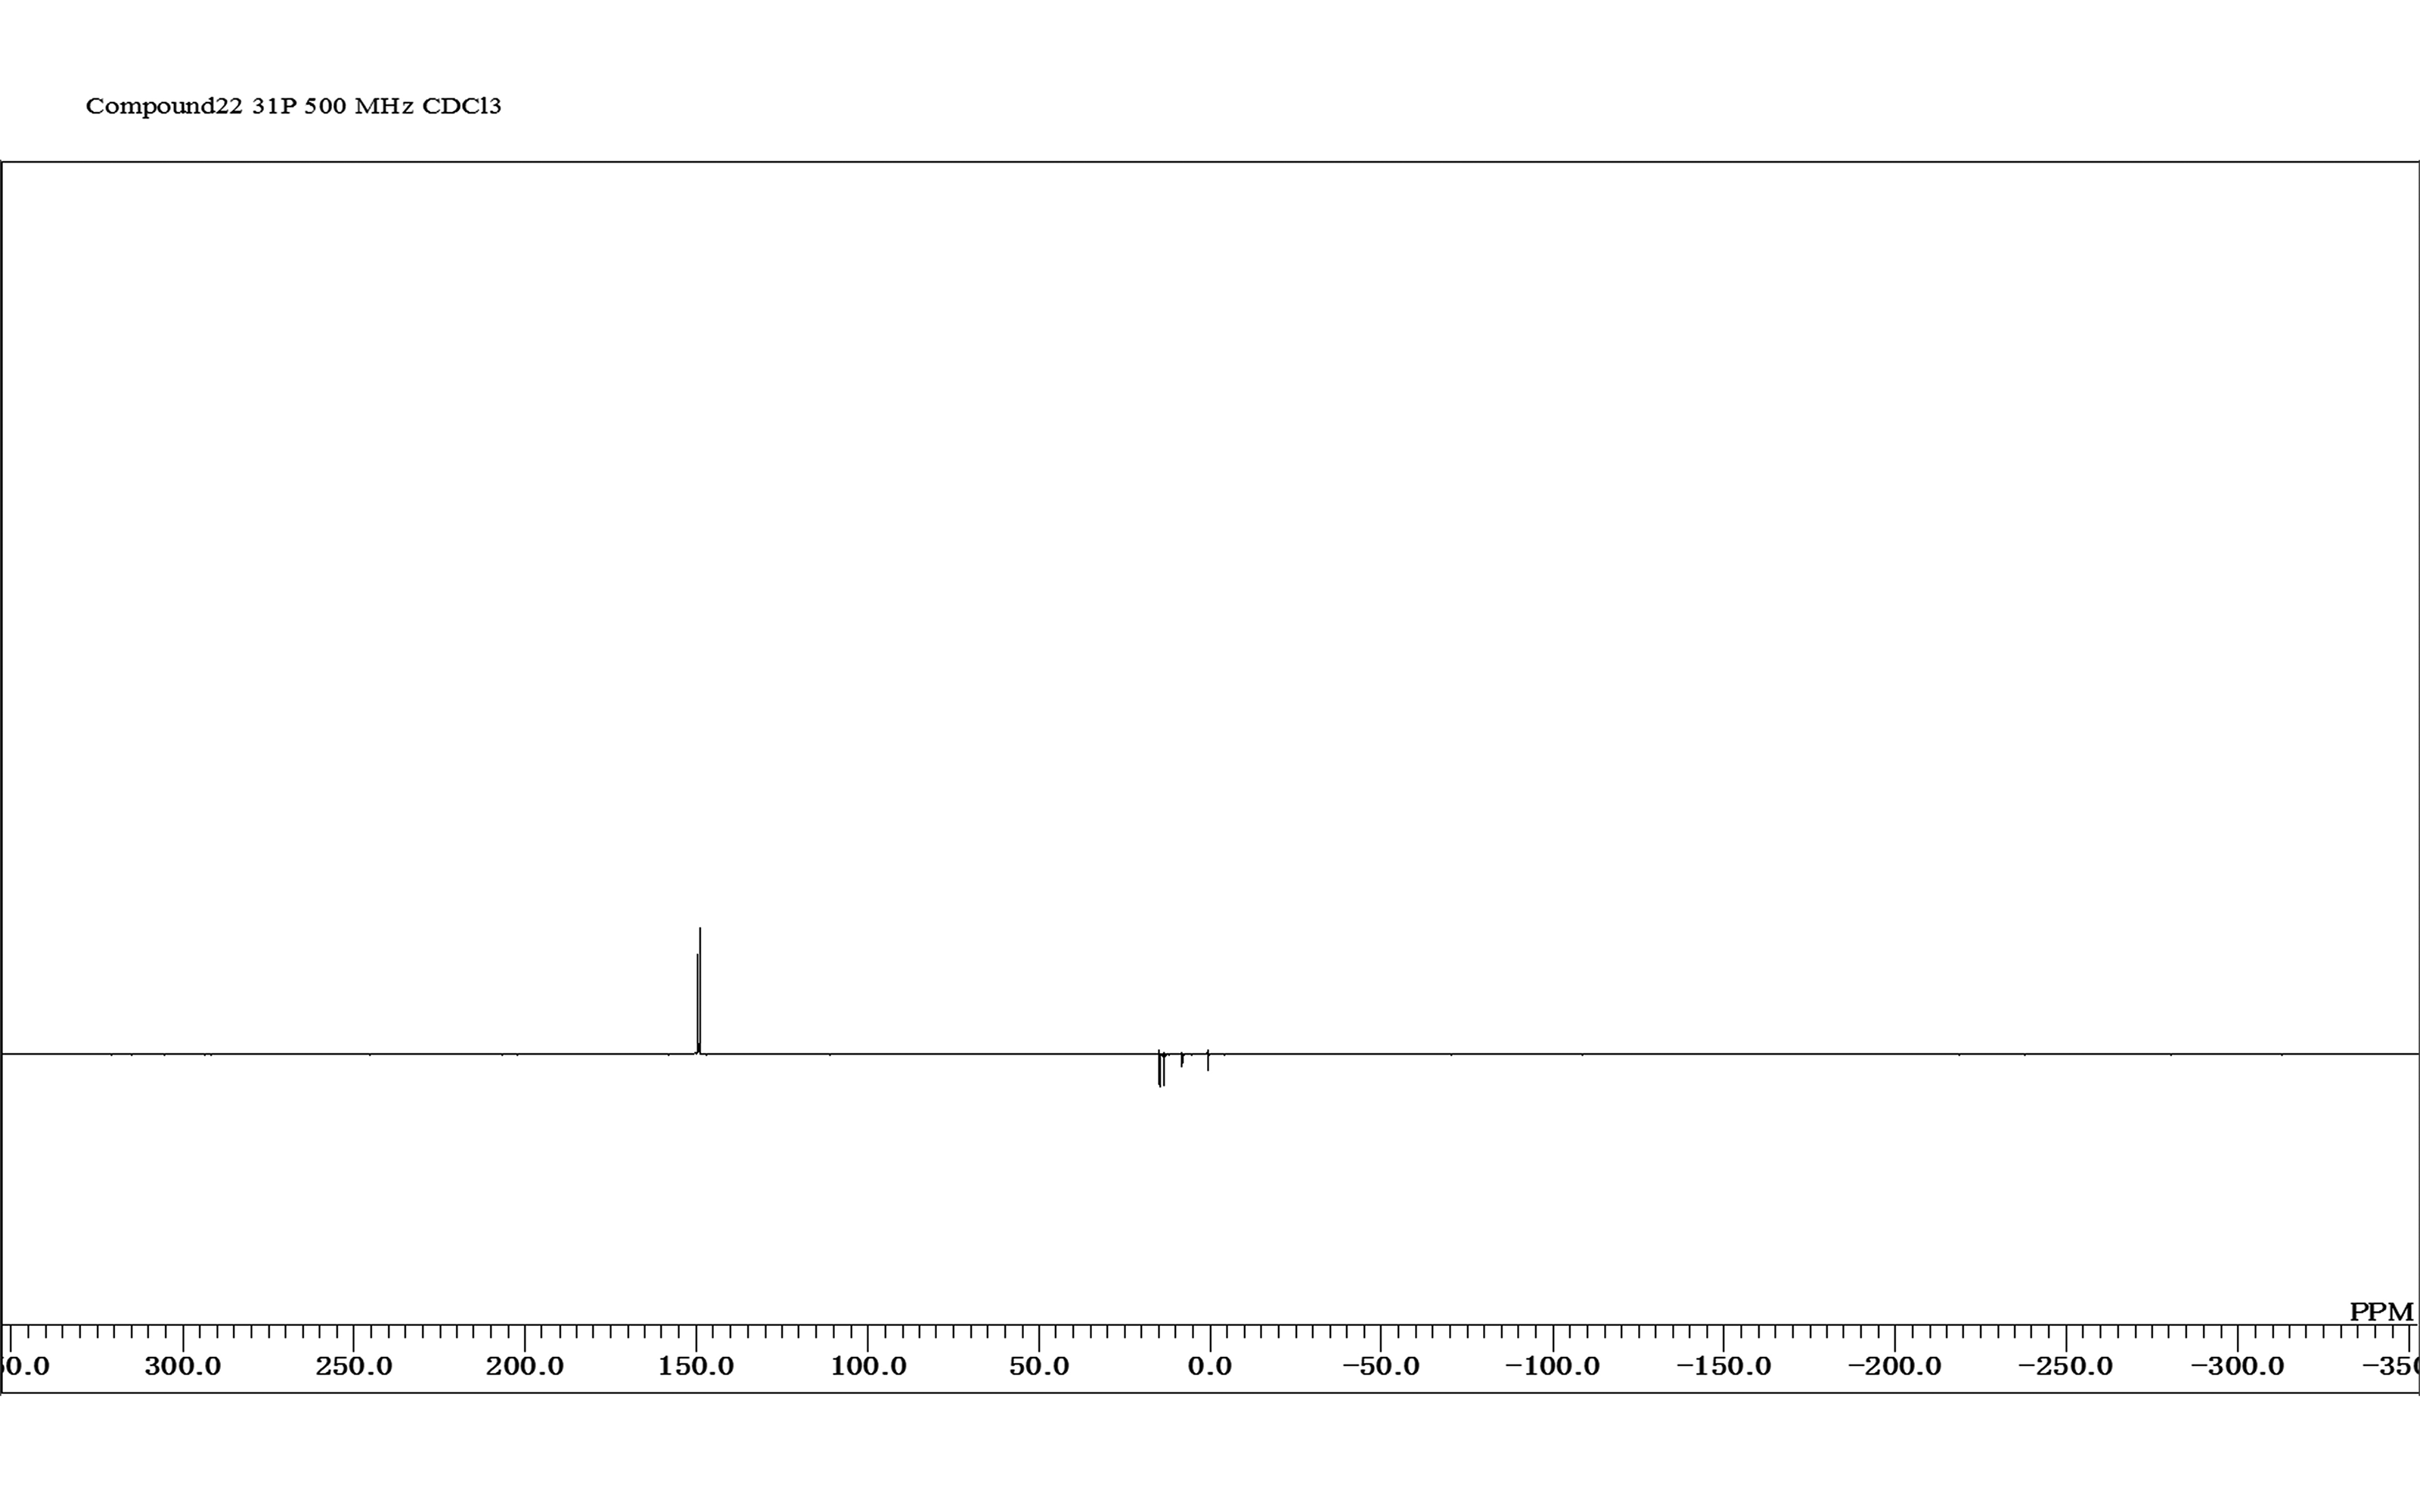


**Figure S34.** 31P-NMR spectrum of compound 22.


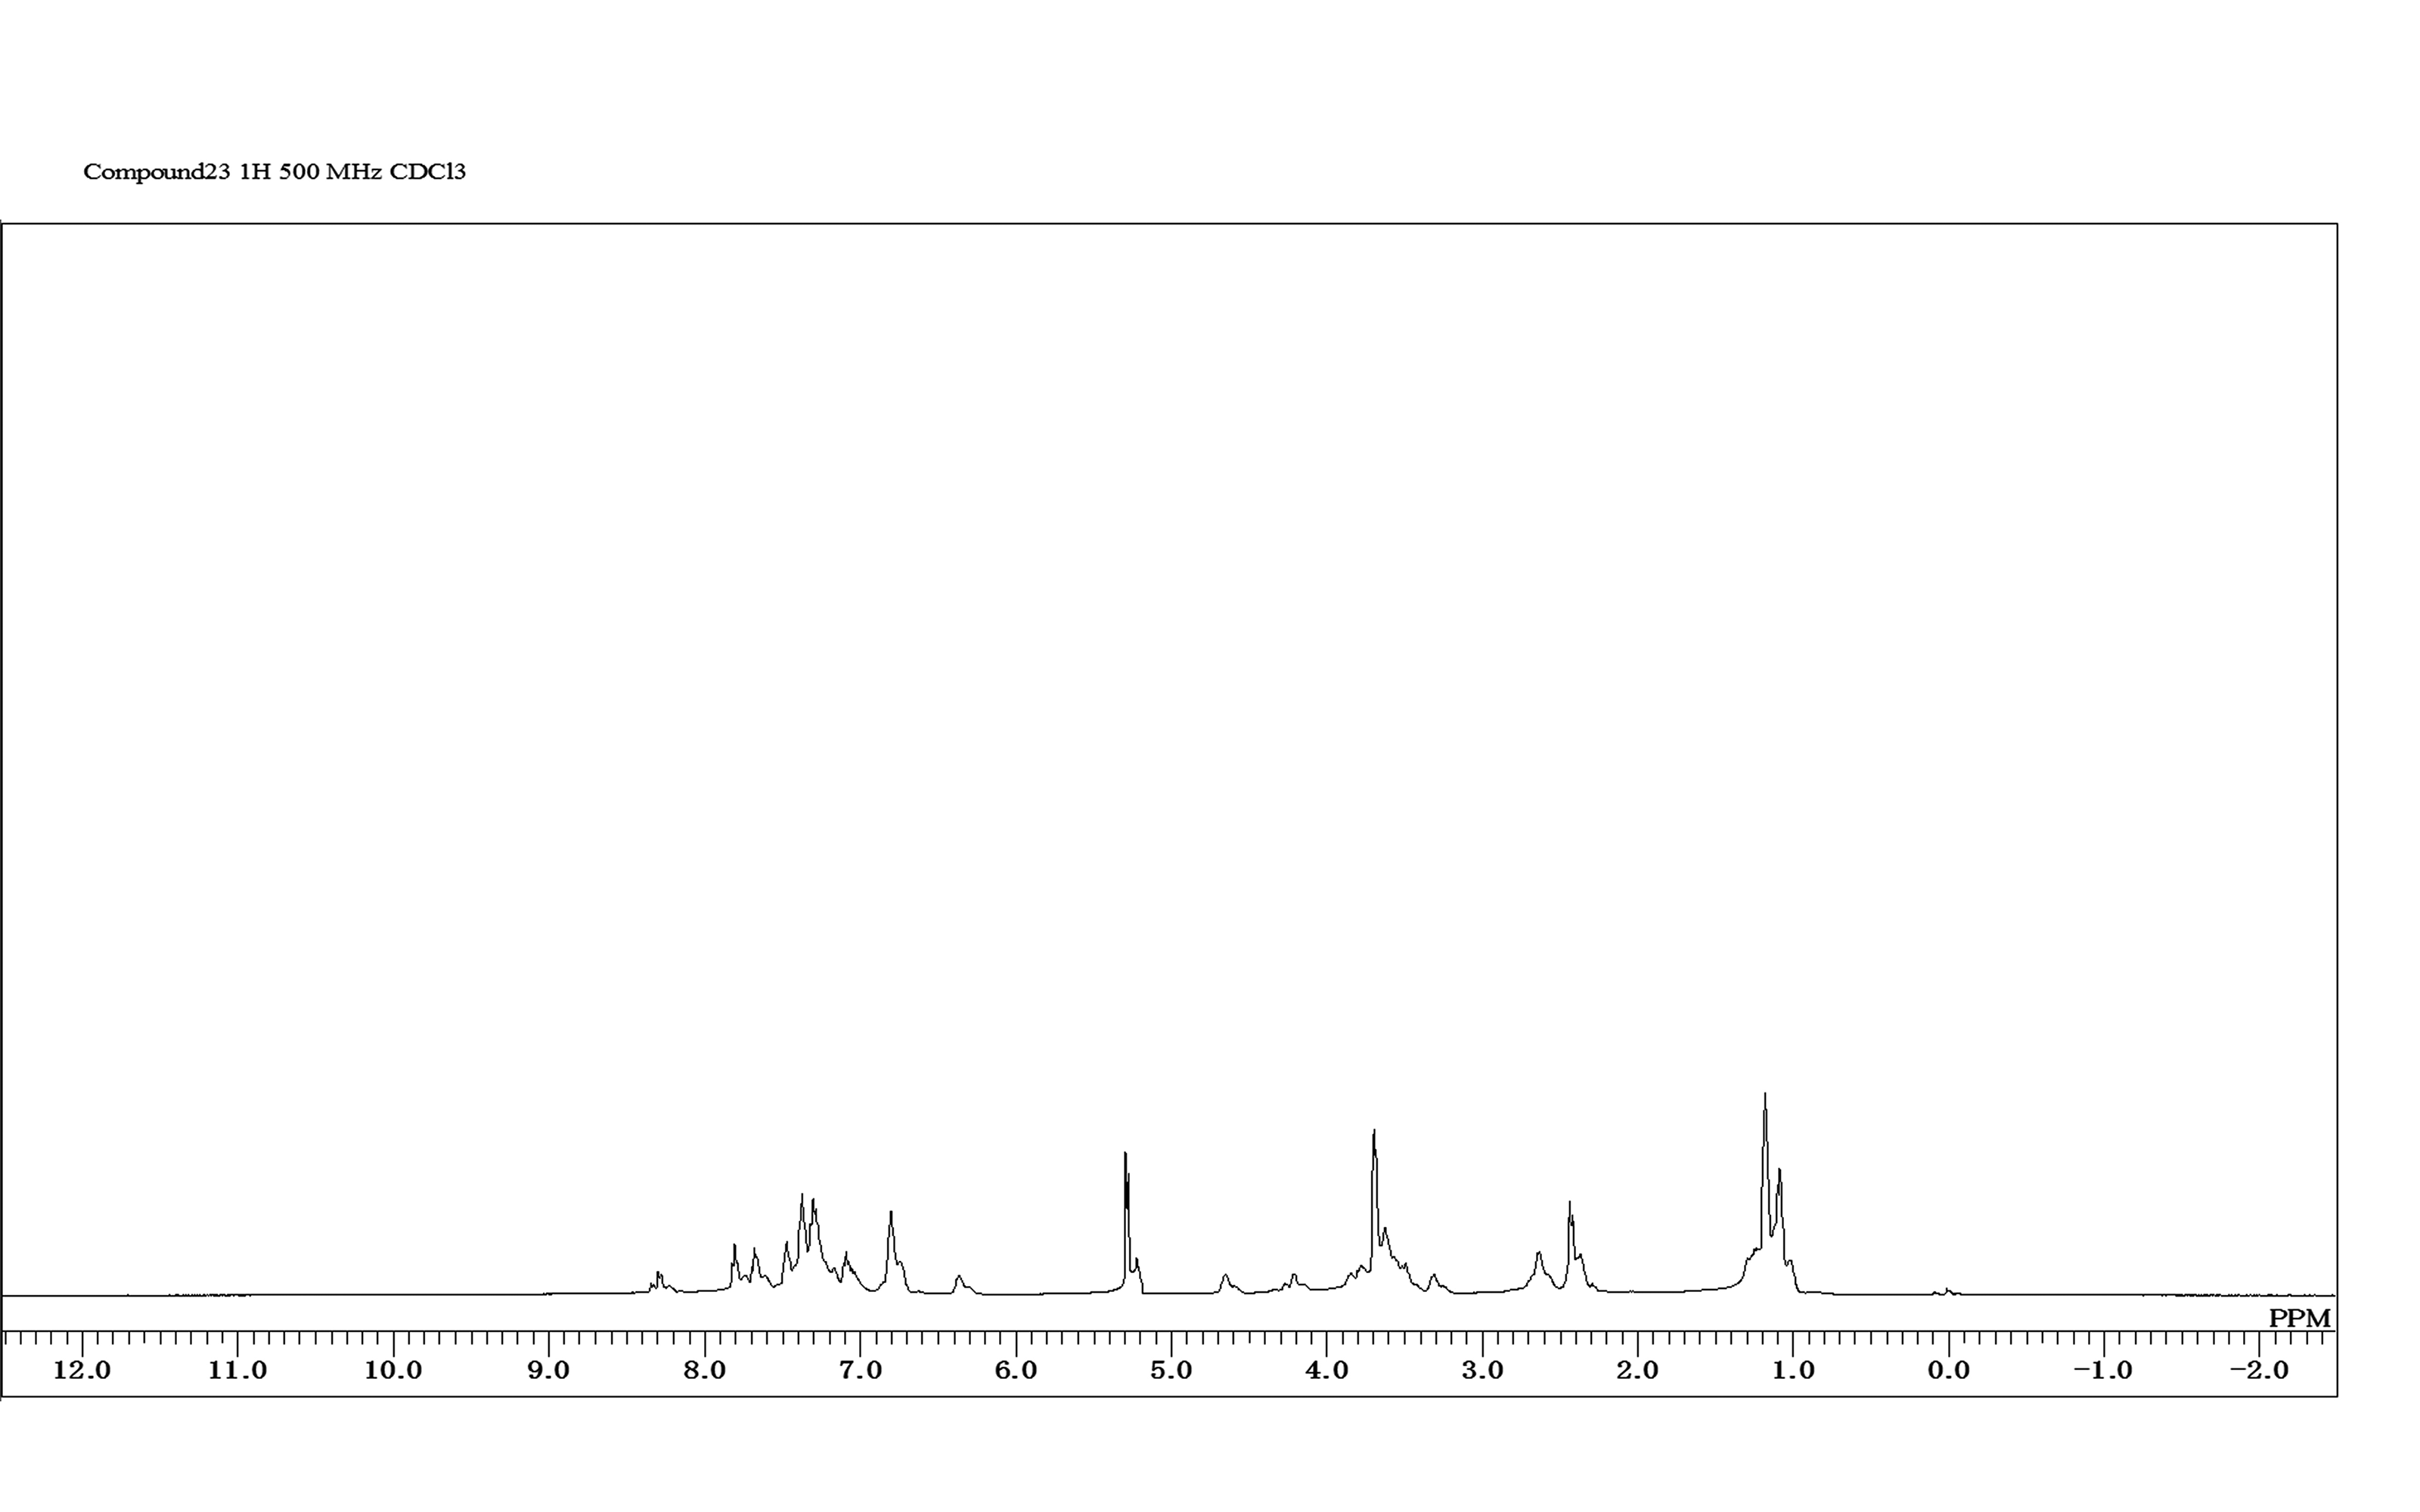


**Figure S35.** 1H-NMR spectrum of compound 23.


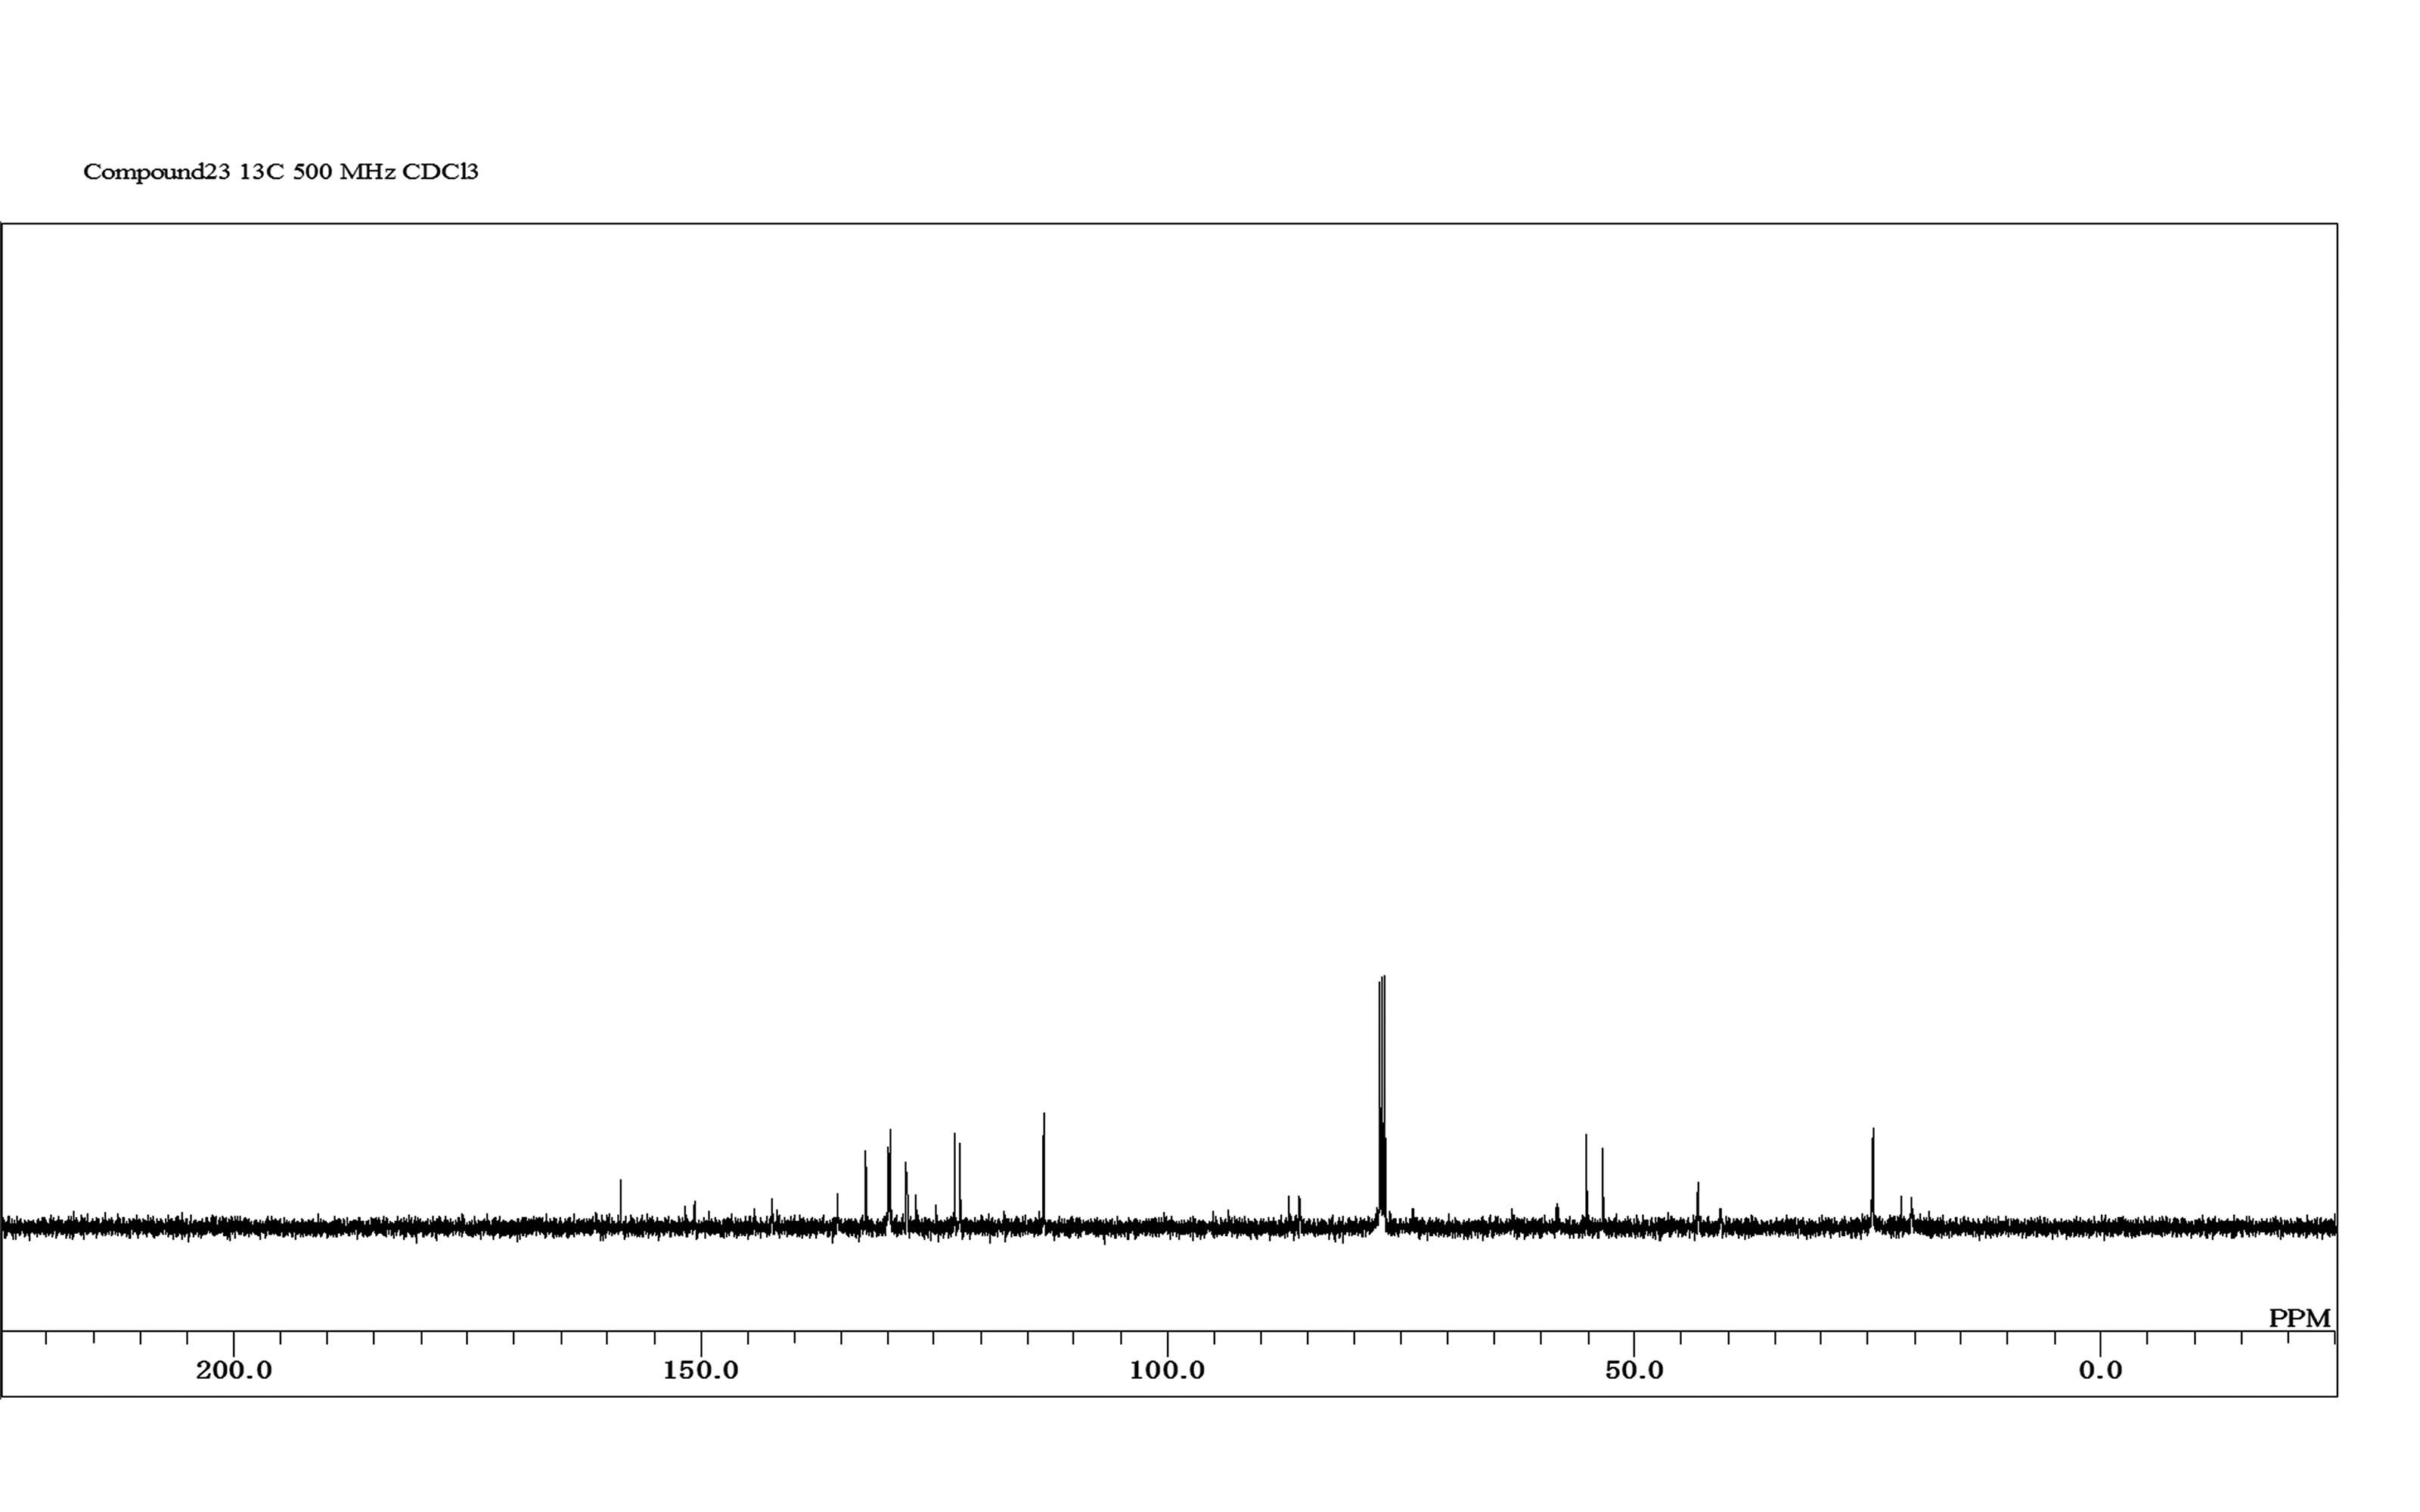


**Figure S36.** 13C-NMR spectrum of compound 23.


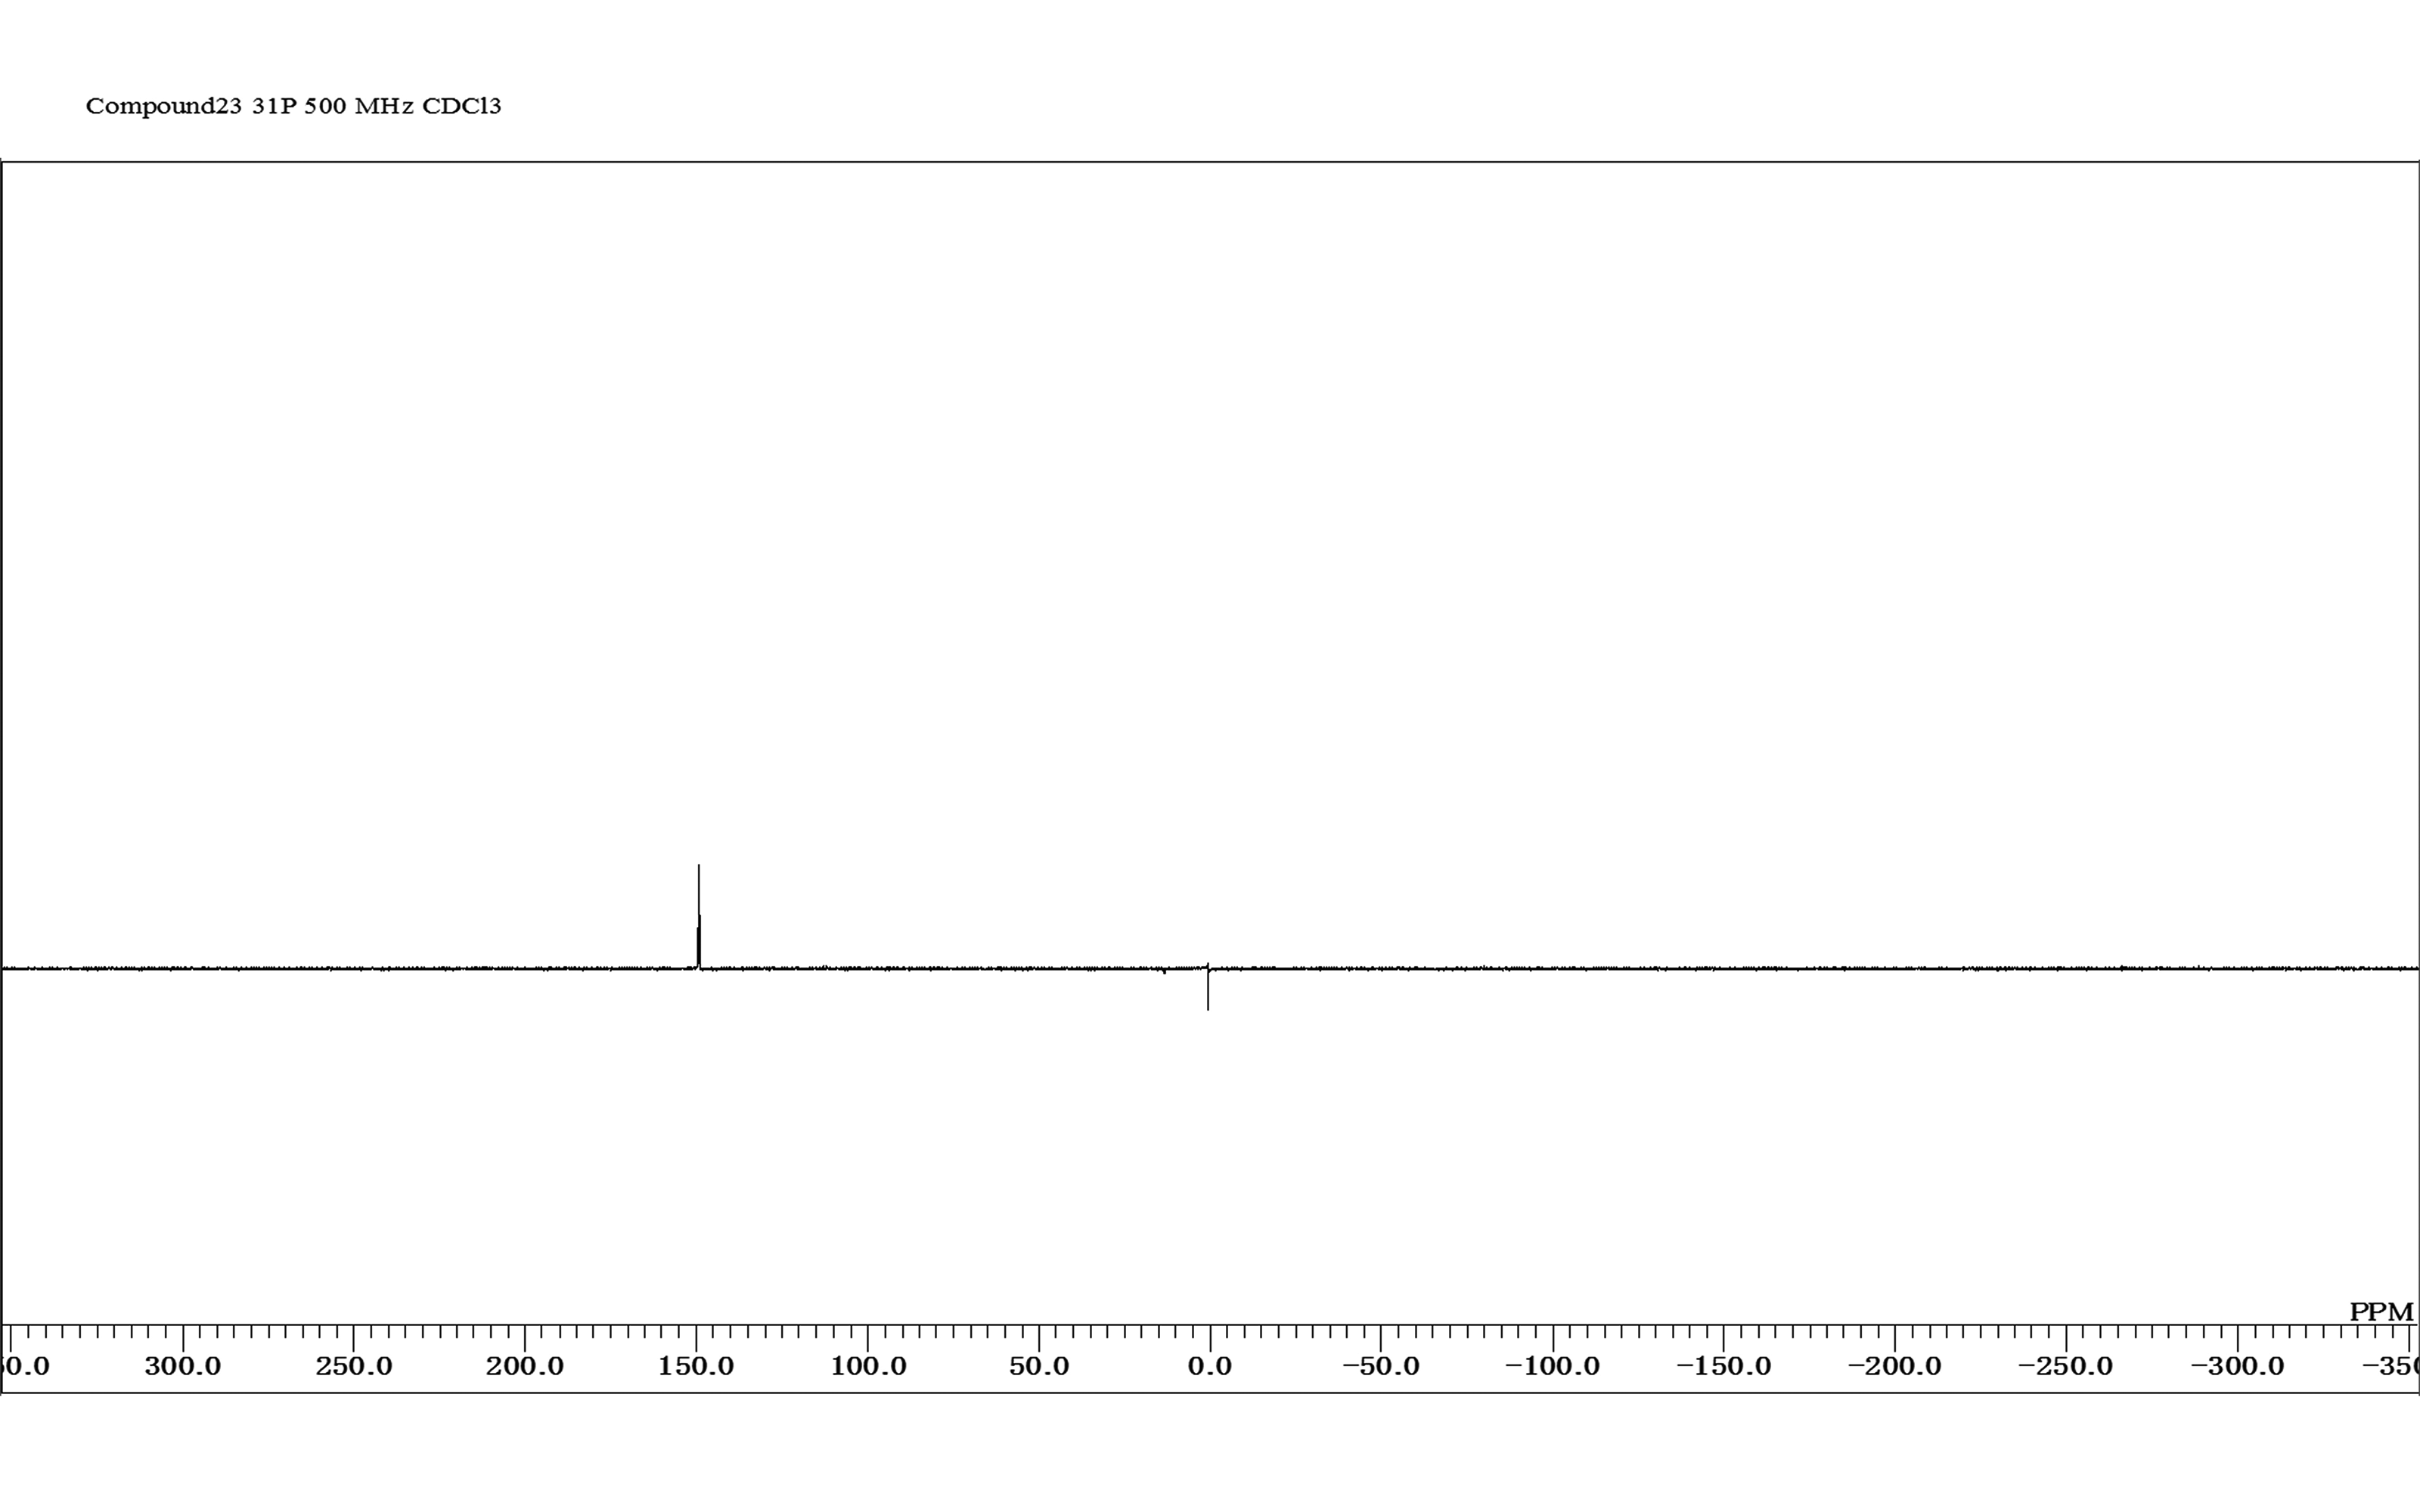


**Figure S37.** 31P-NMR spectrum of compound 23.


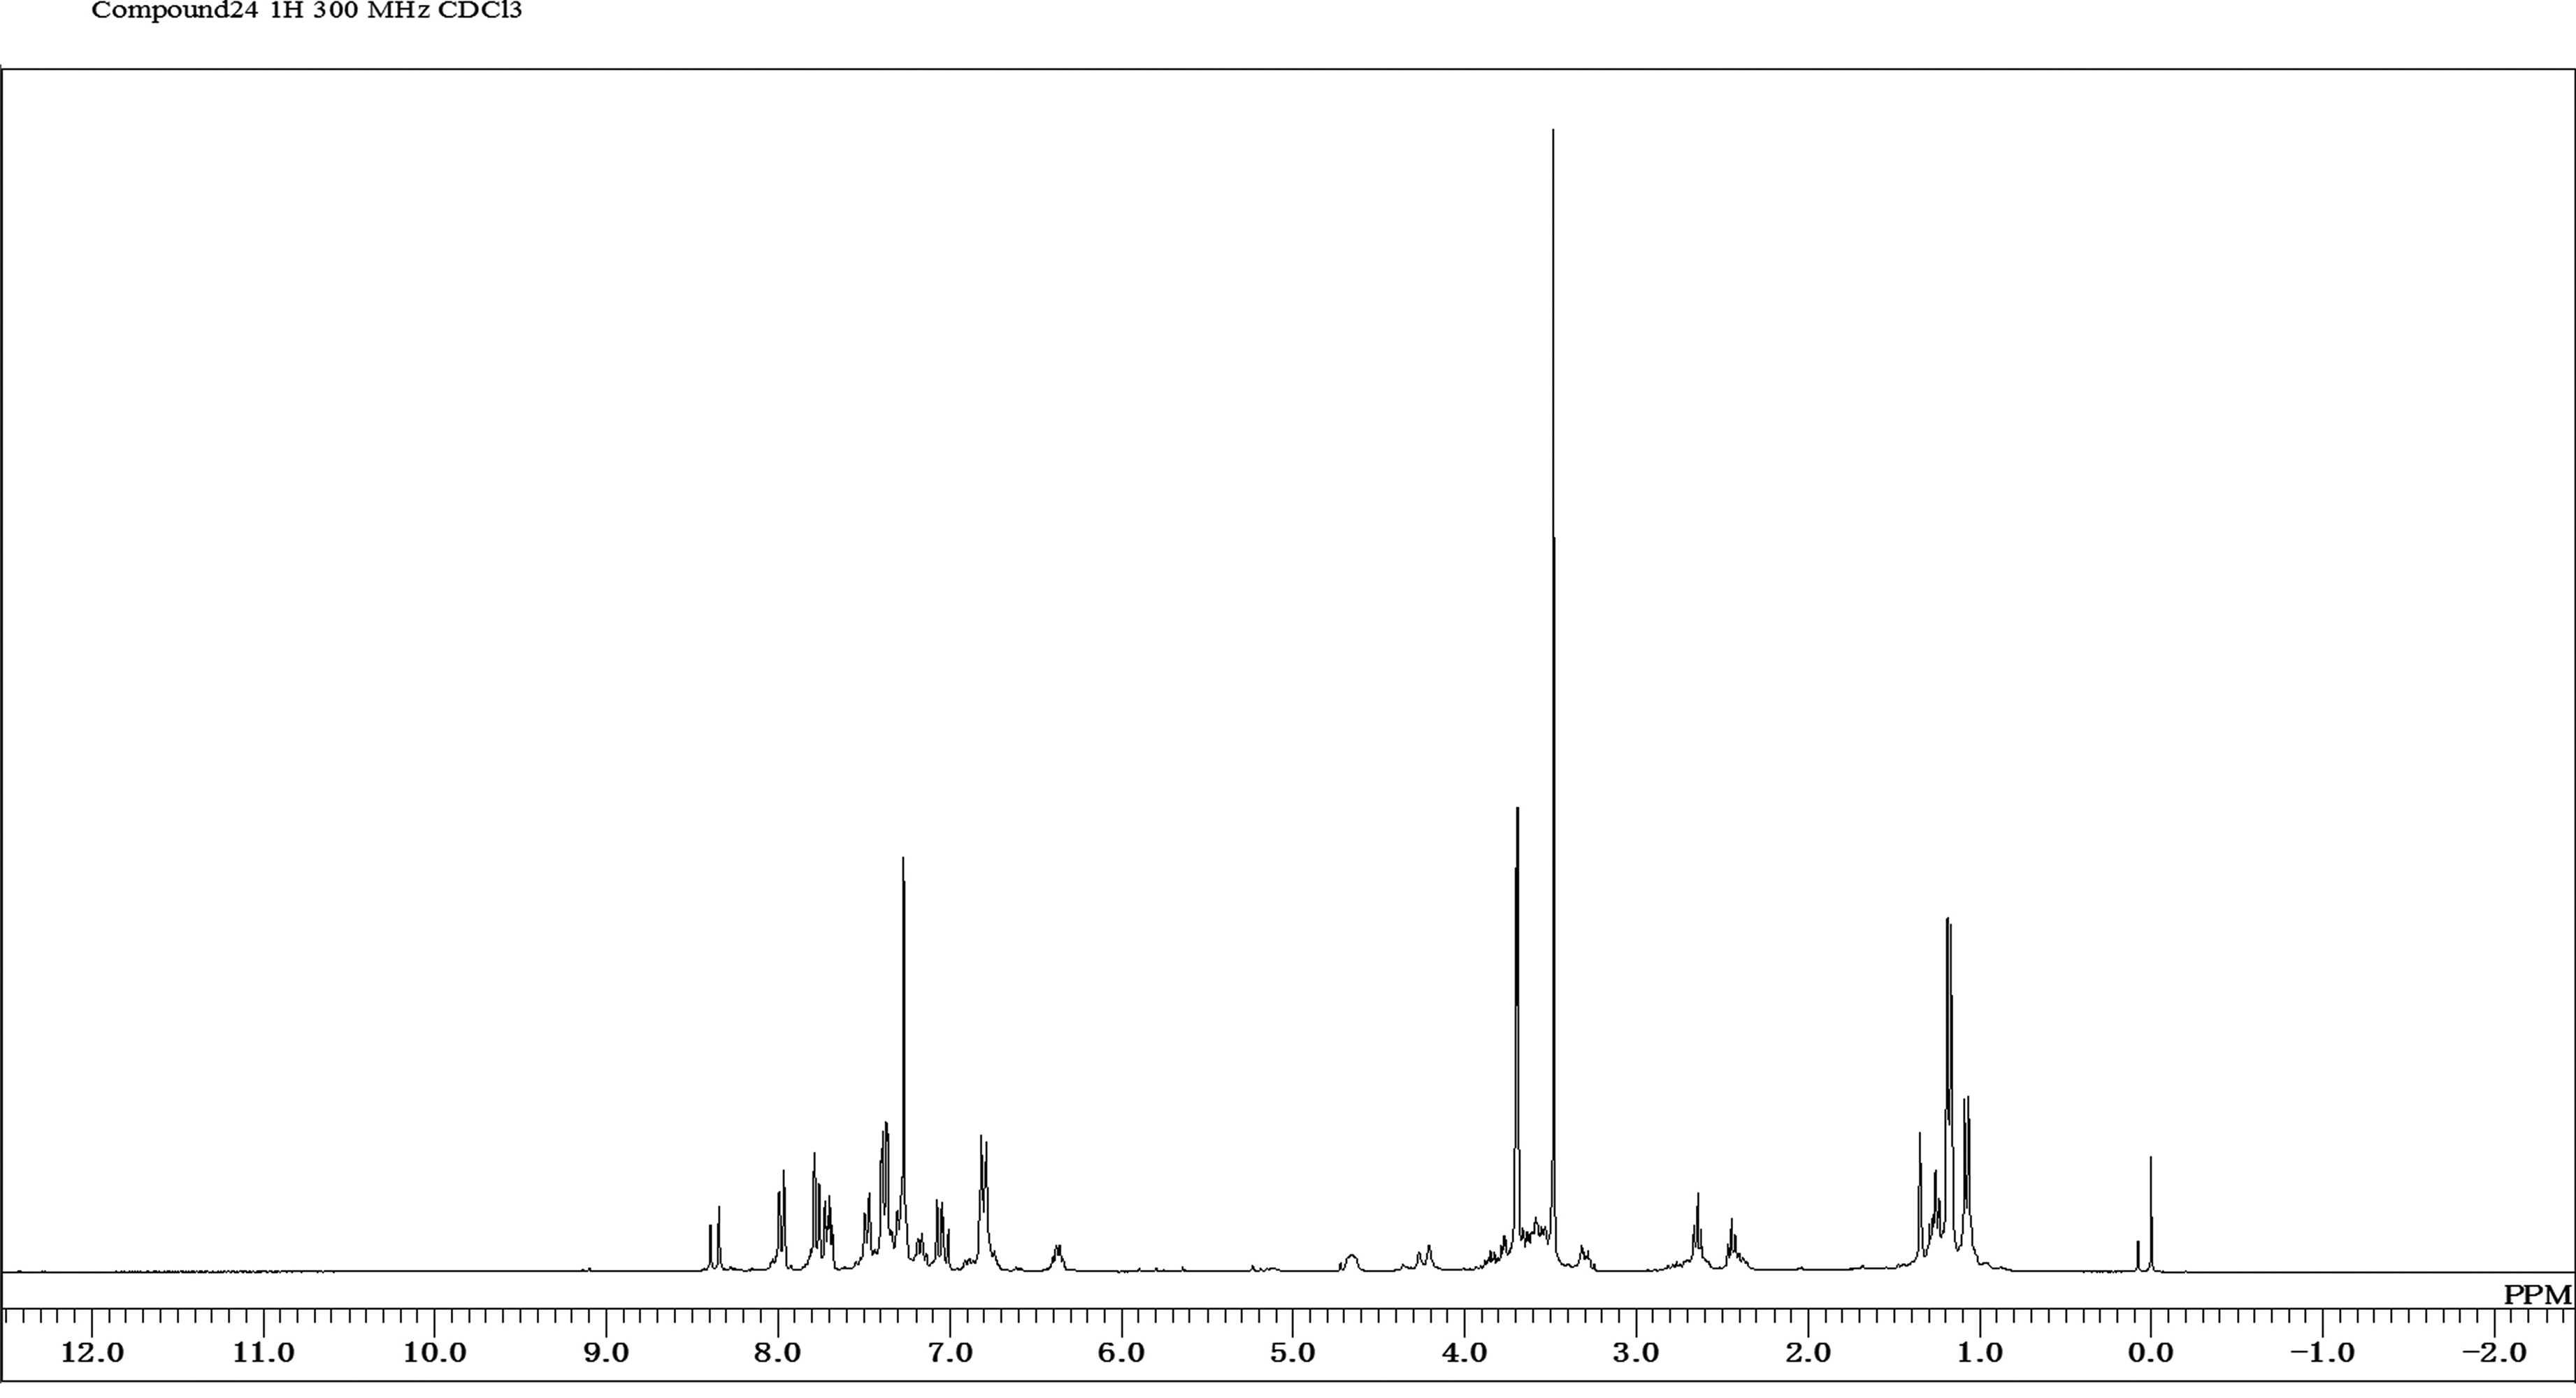


**Figure S38.** 1H-NMR spectrum of compound 24.


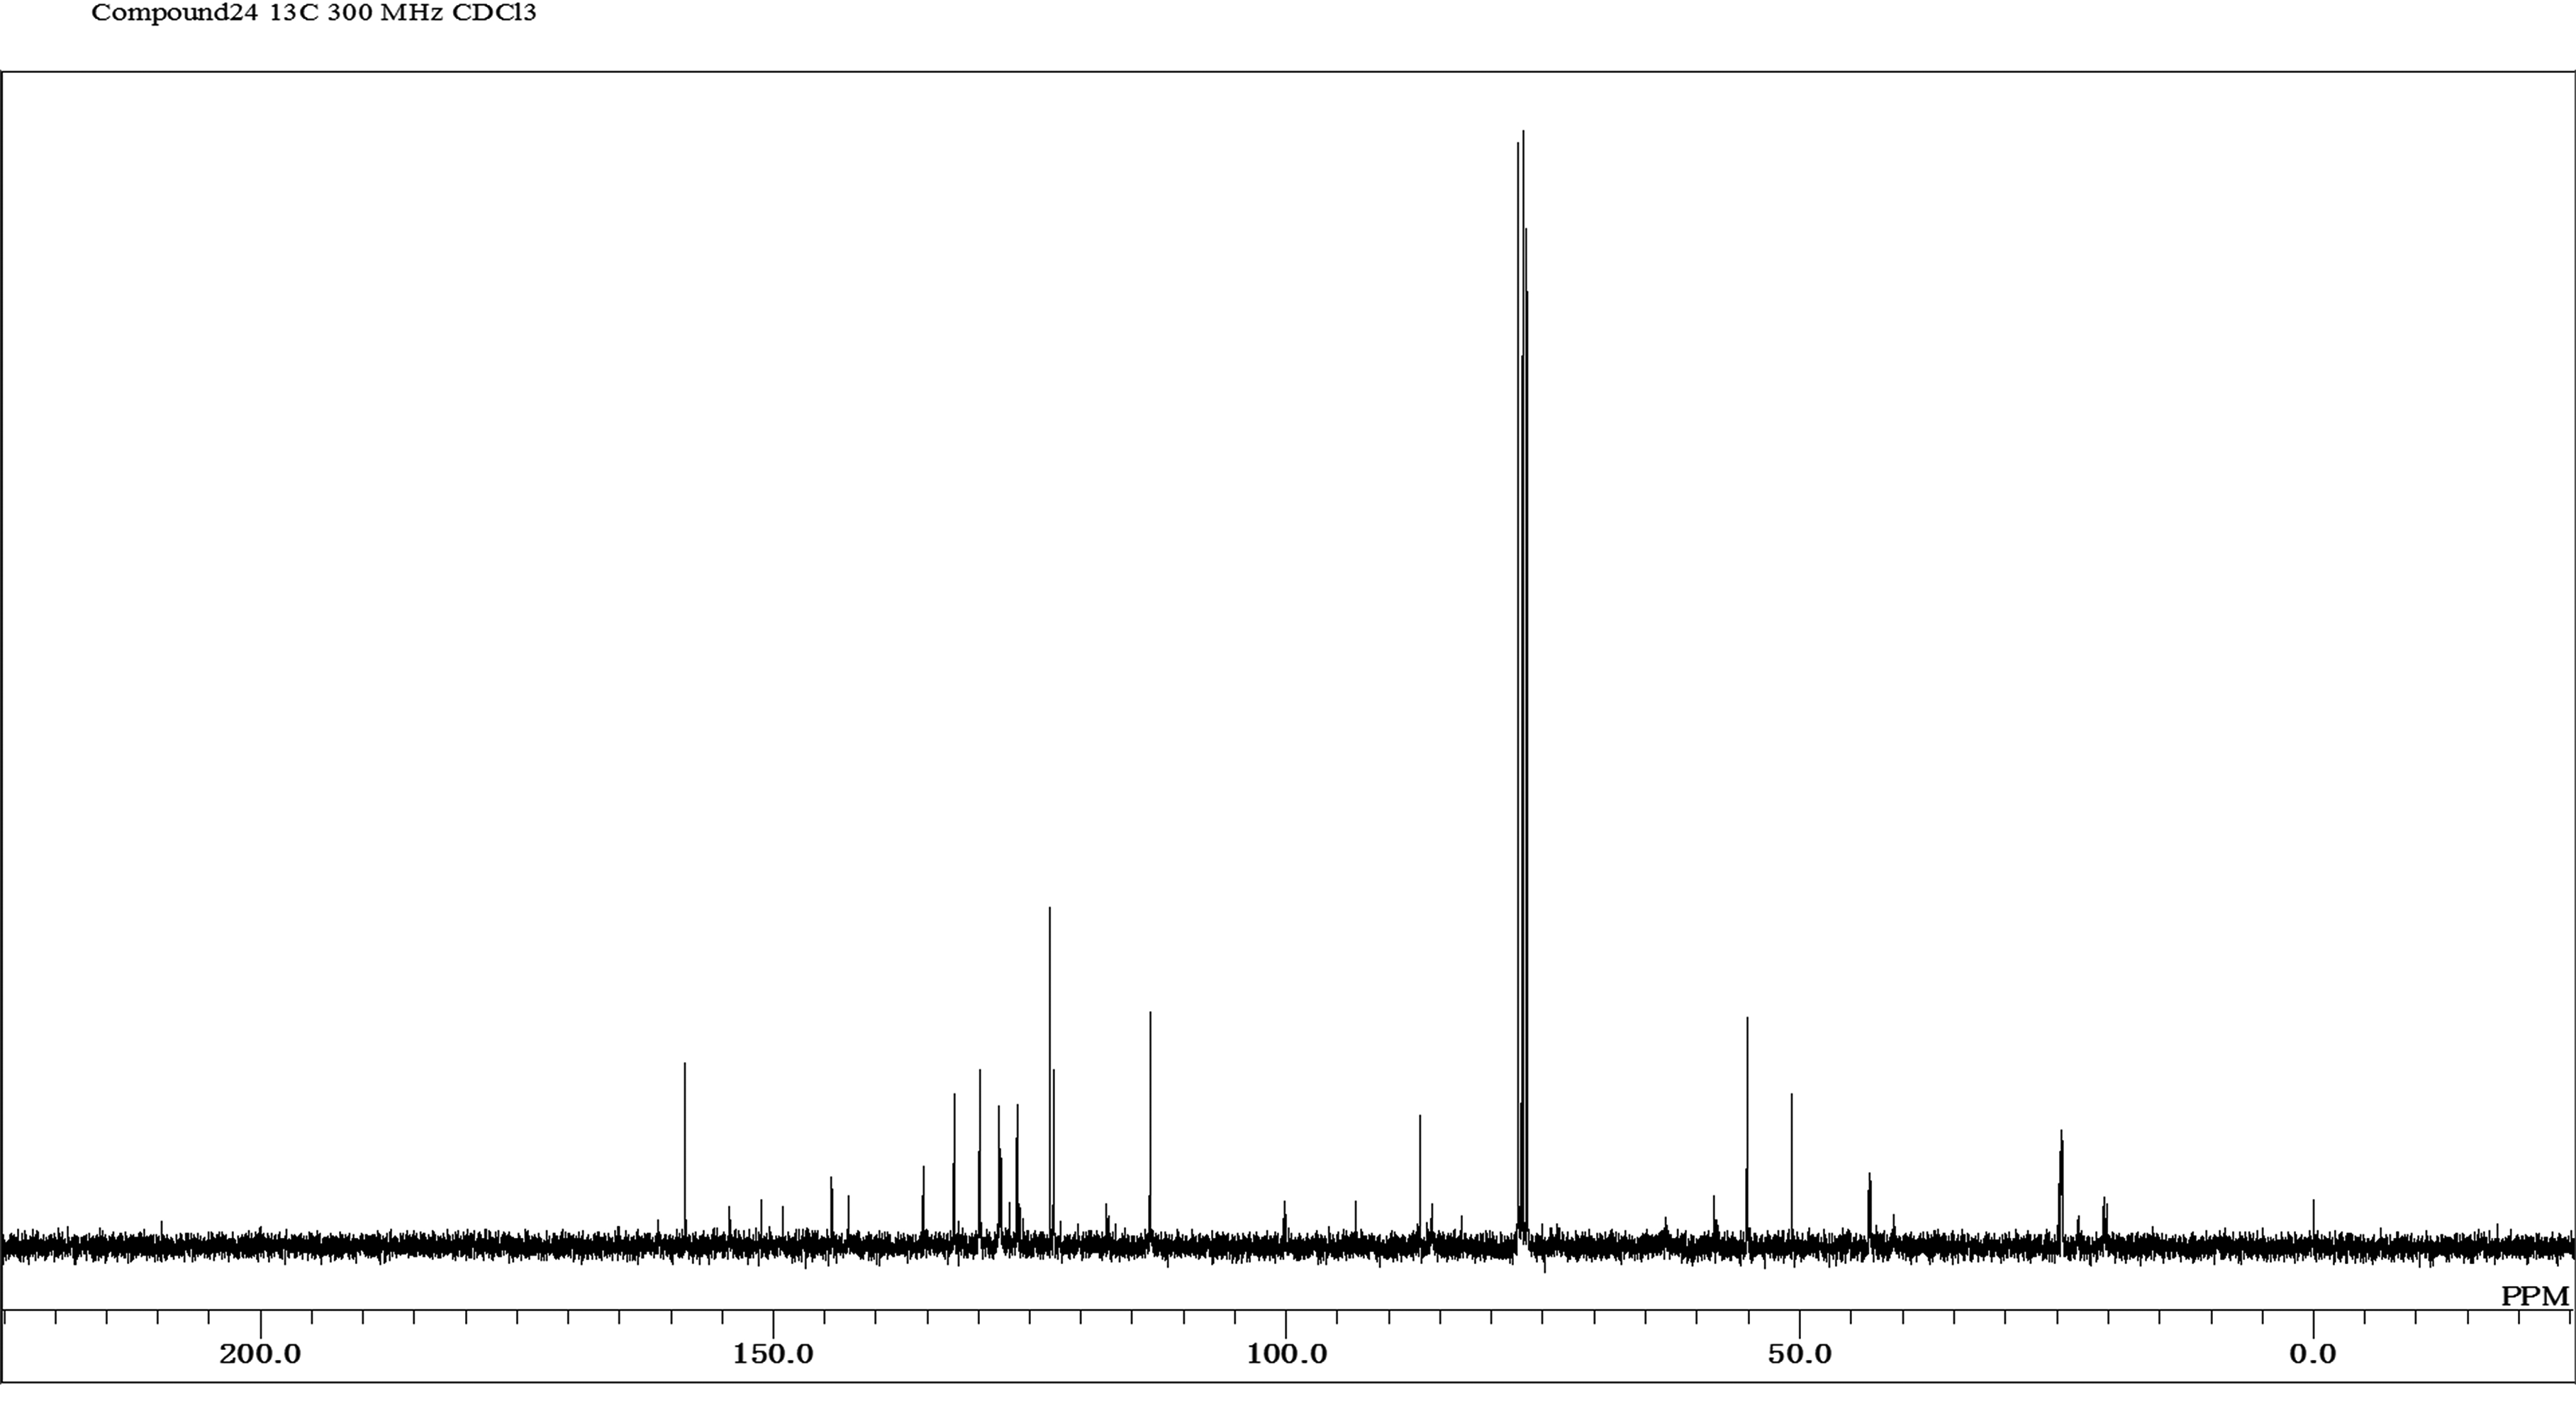


**Figure S39.** 13C-NMR spectrum of compound 24.


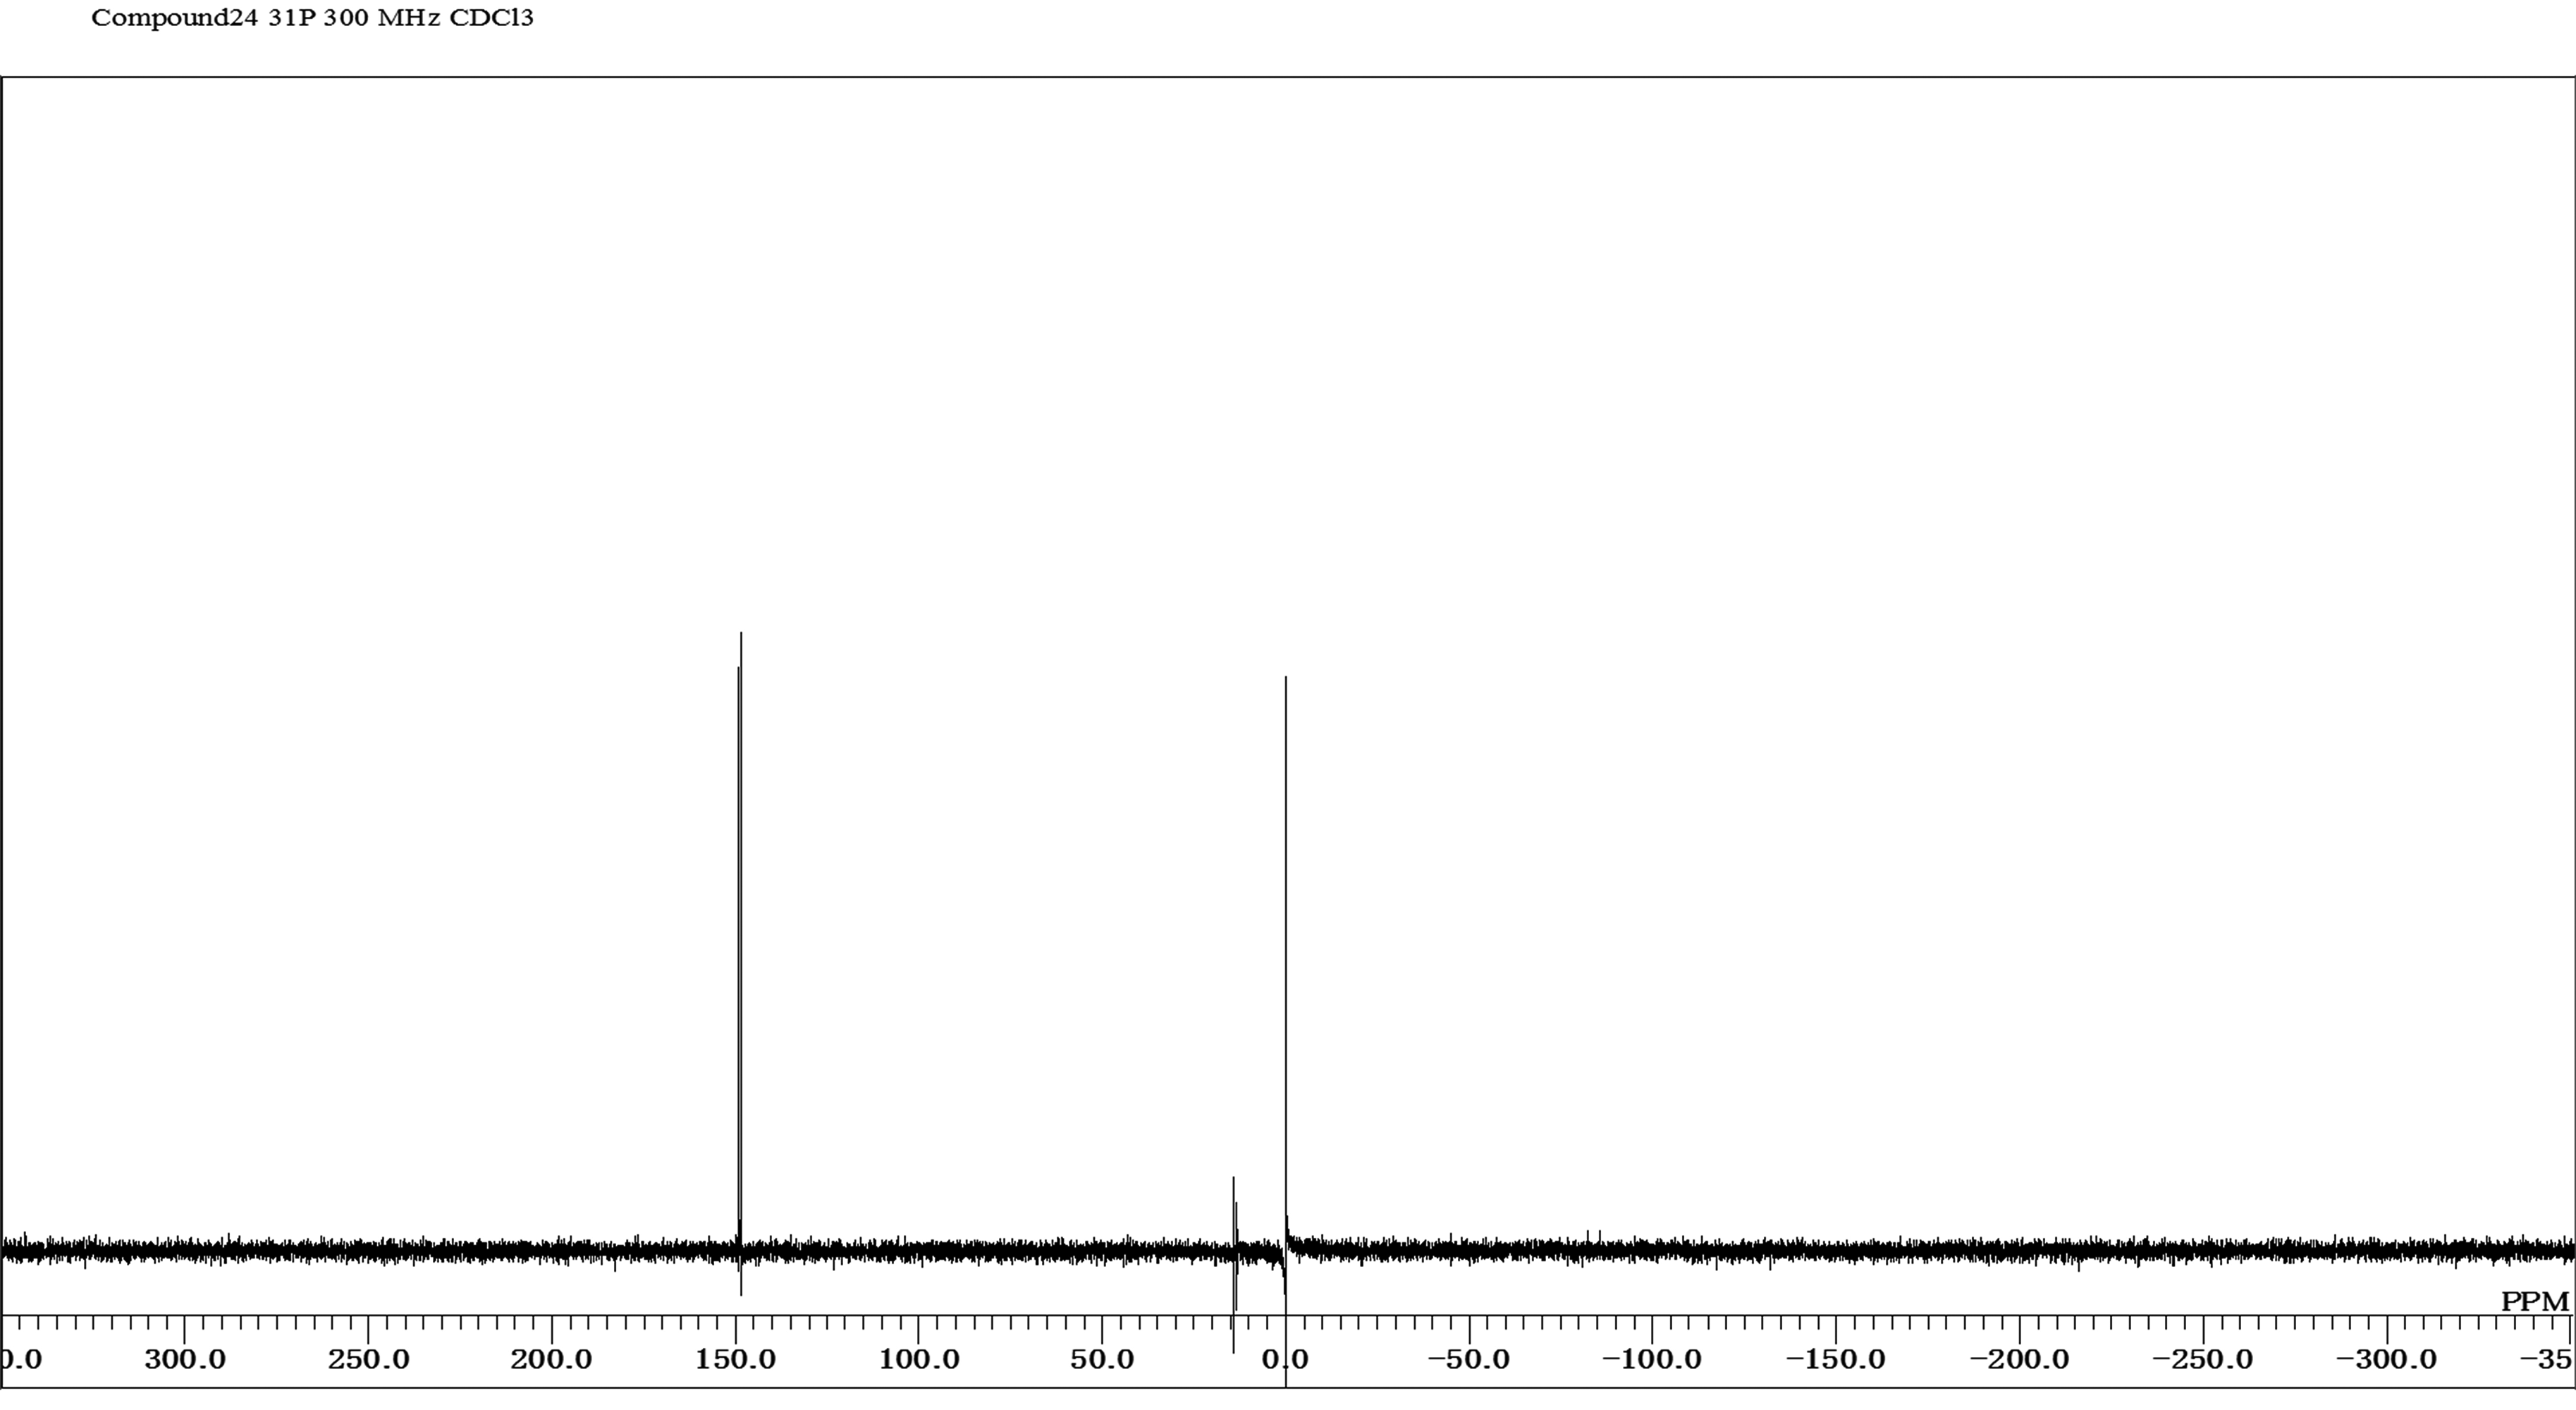


**Figure S40.** 31P-NMR spectrum of compound 24.


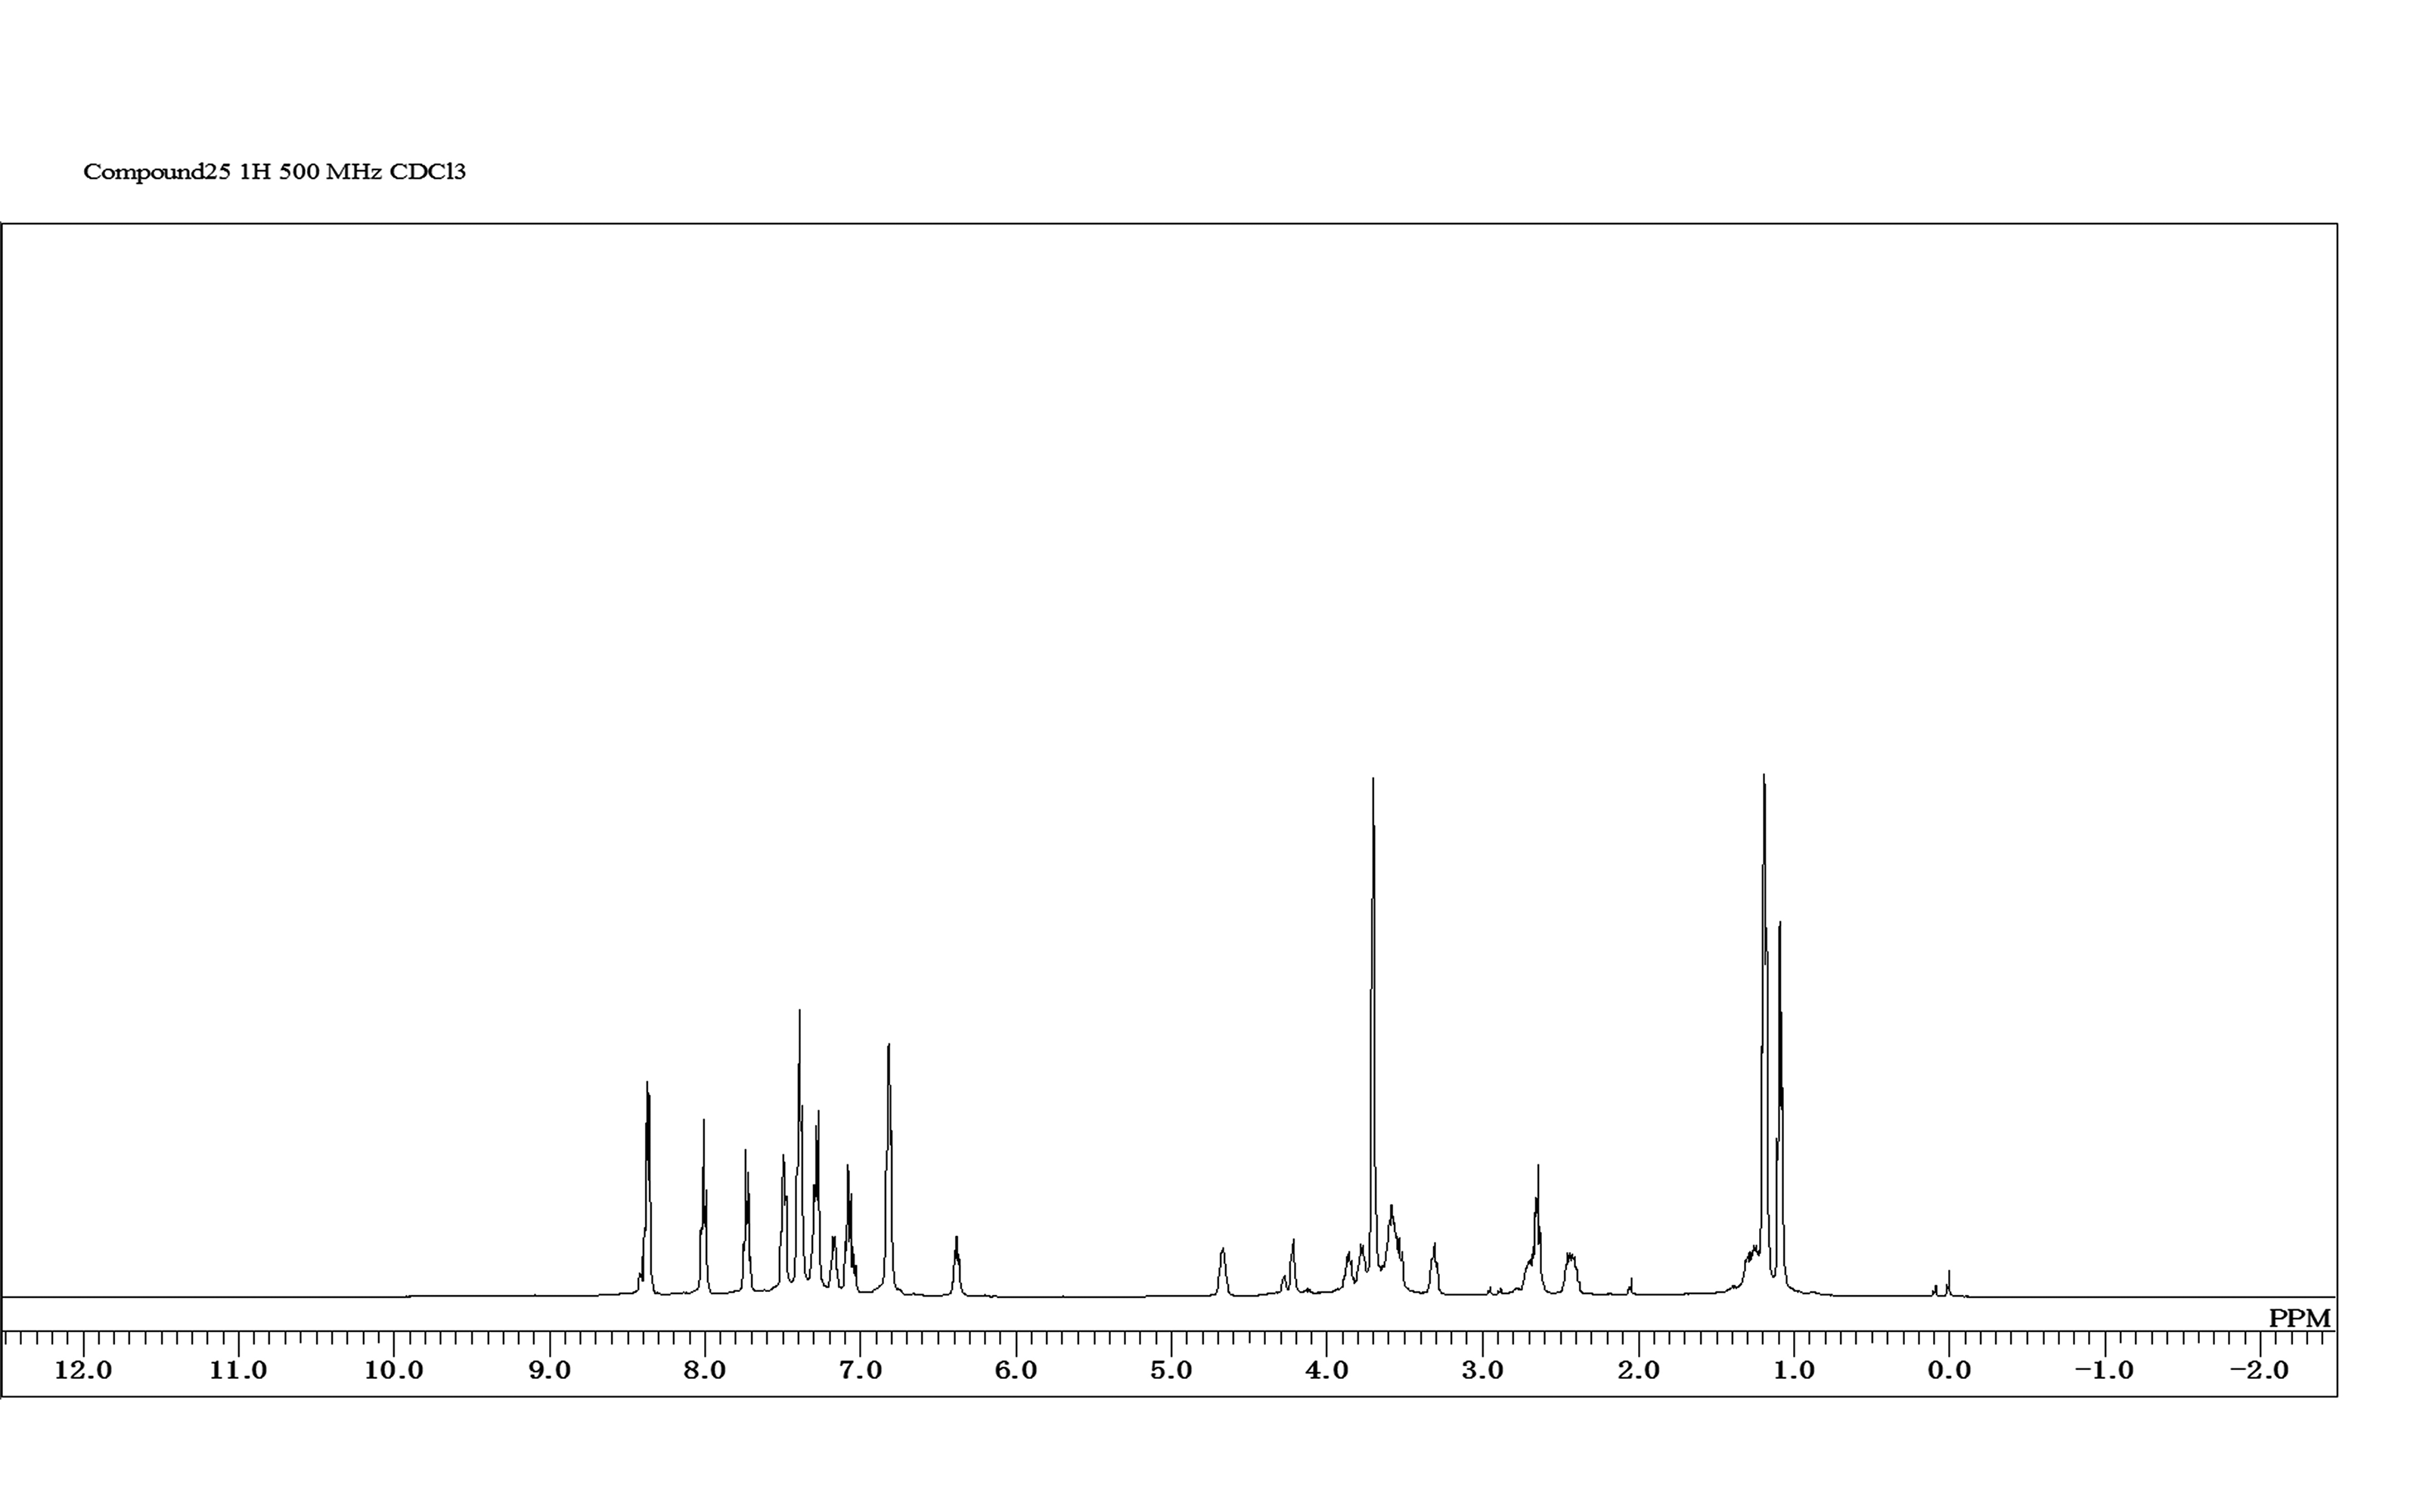


**Figure S41.** 1H-NMR spectrum of compound 25.


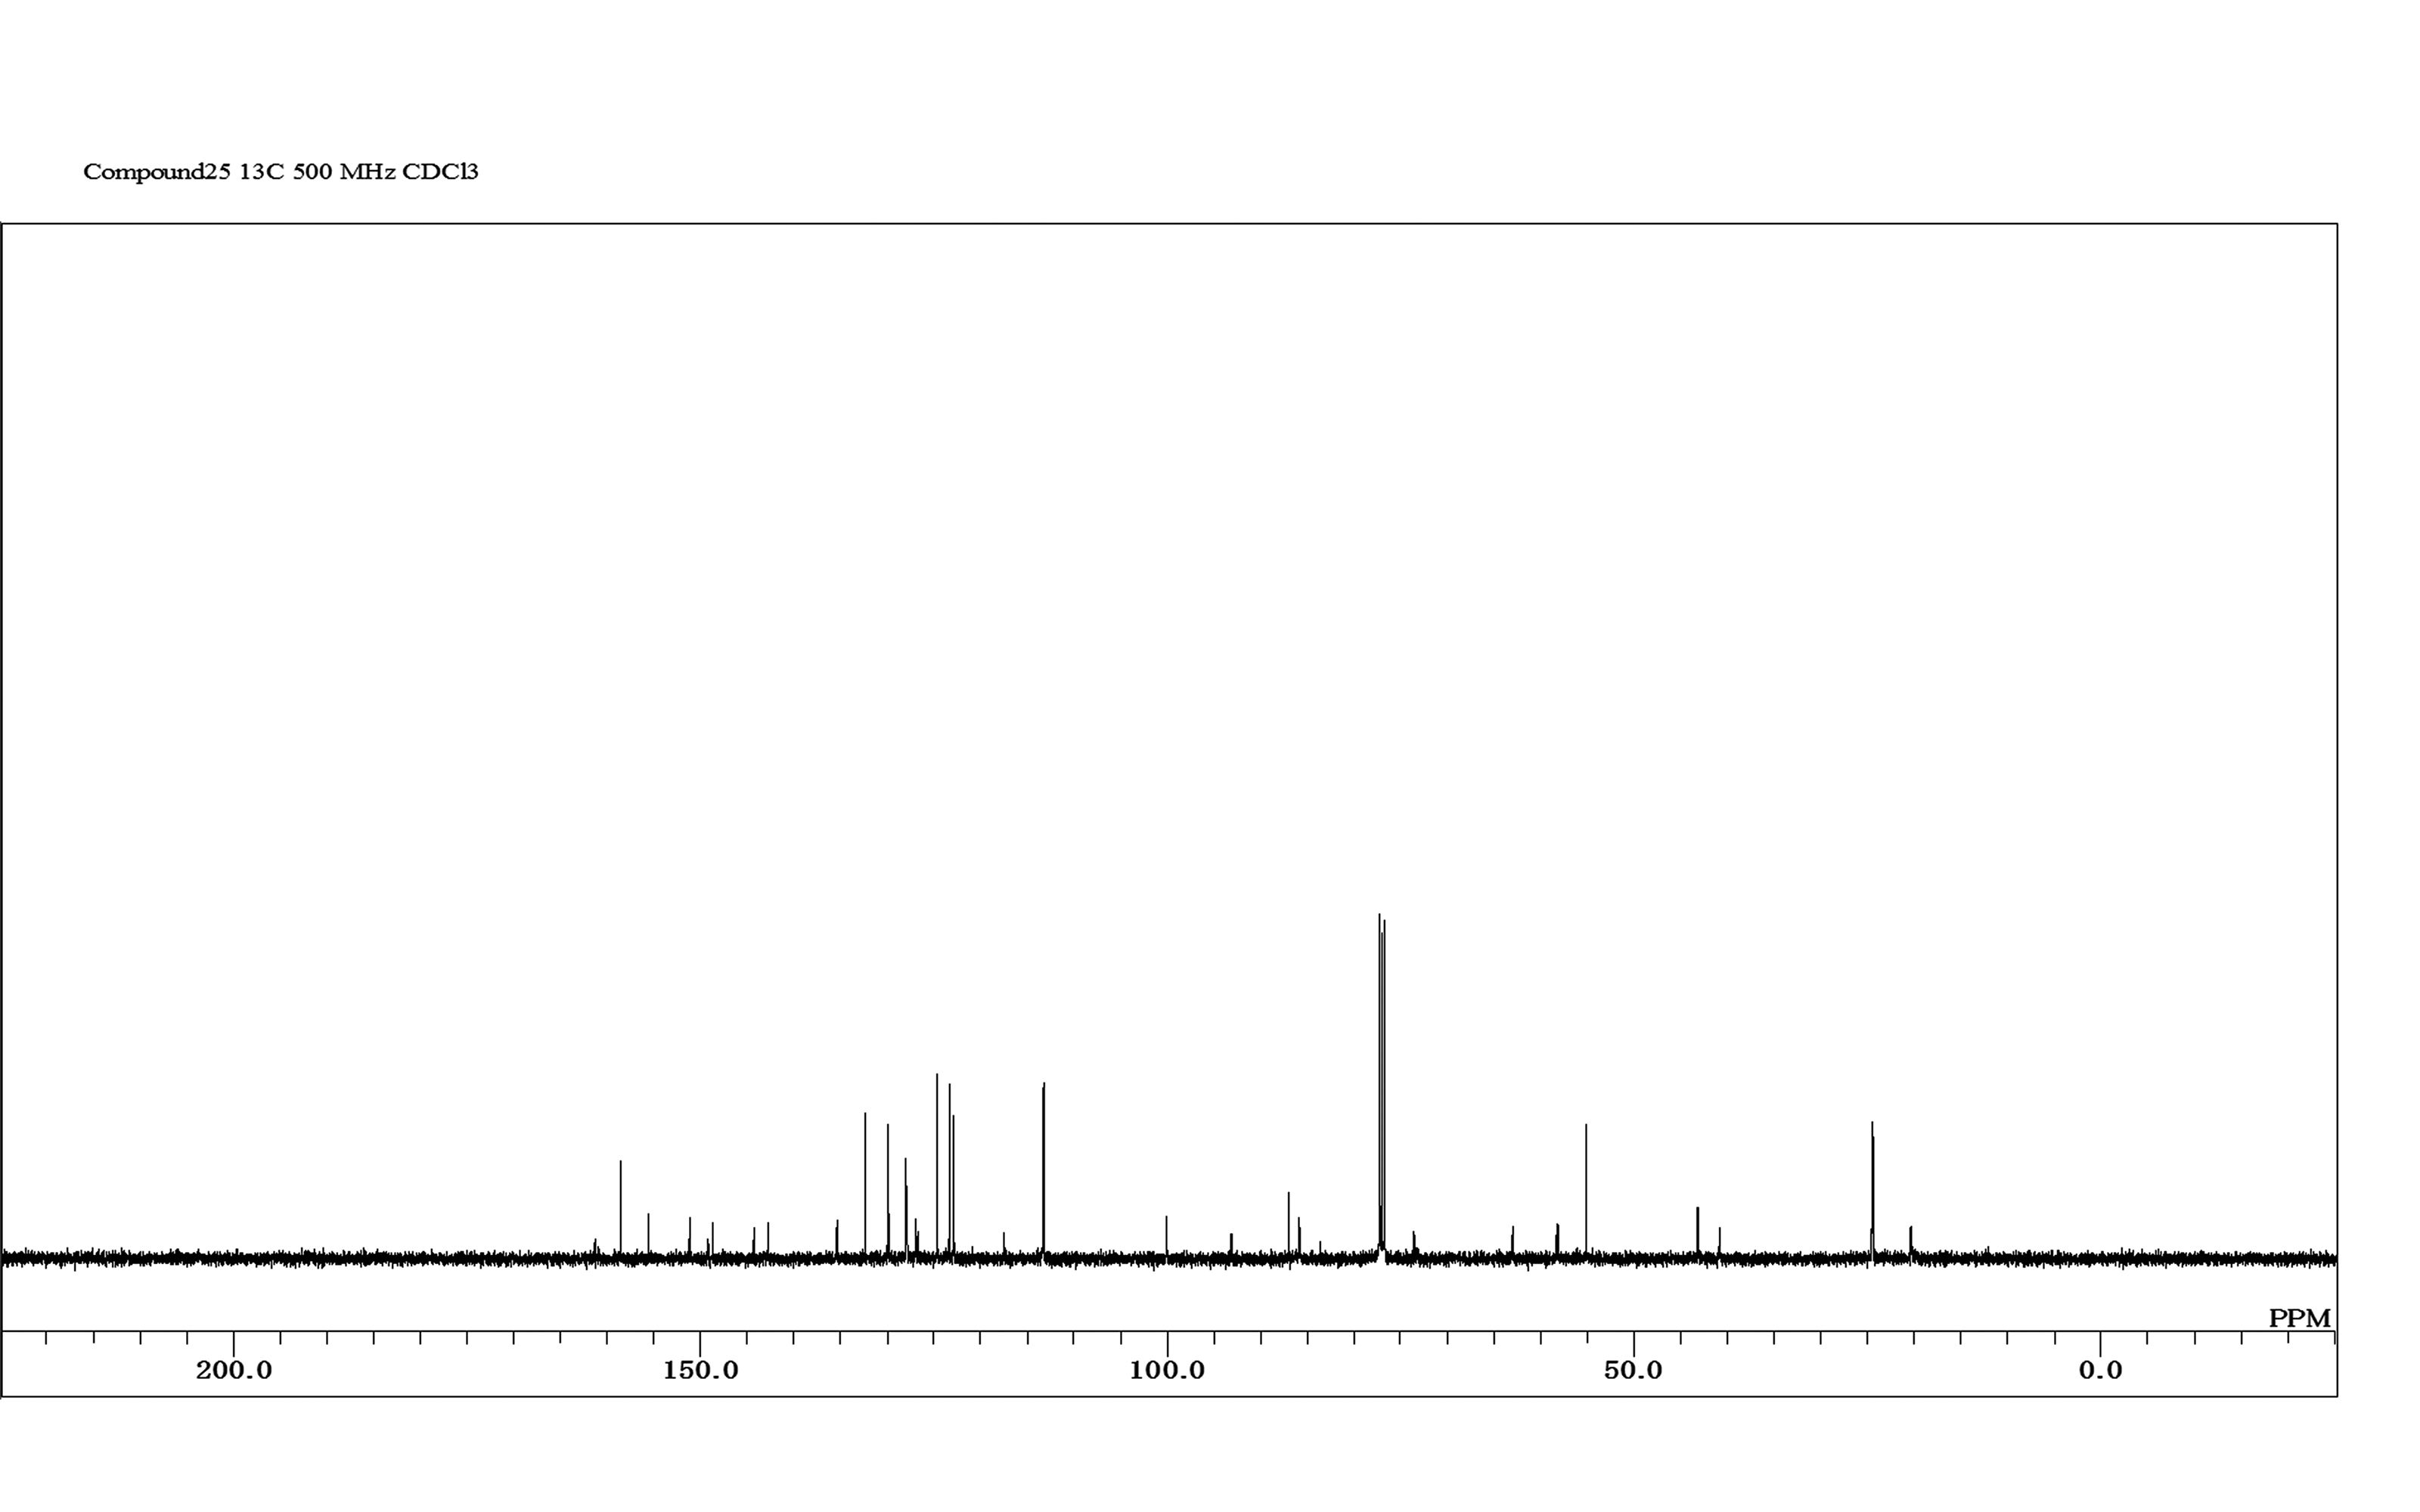


**Figure S42.** 13C-NMR spectrum of compound 25.


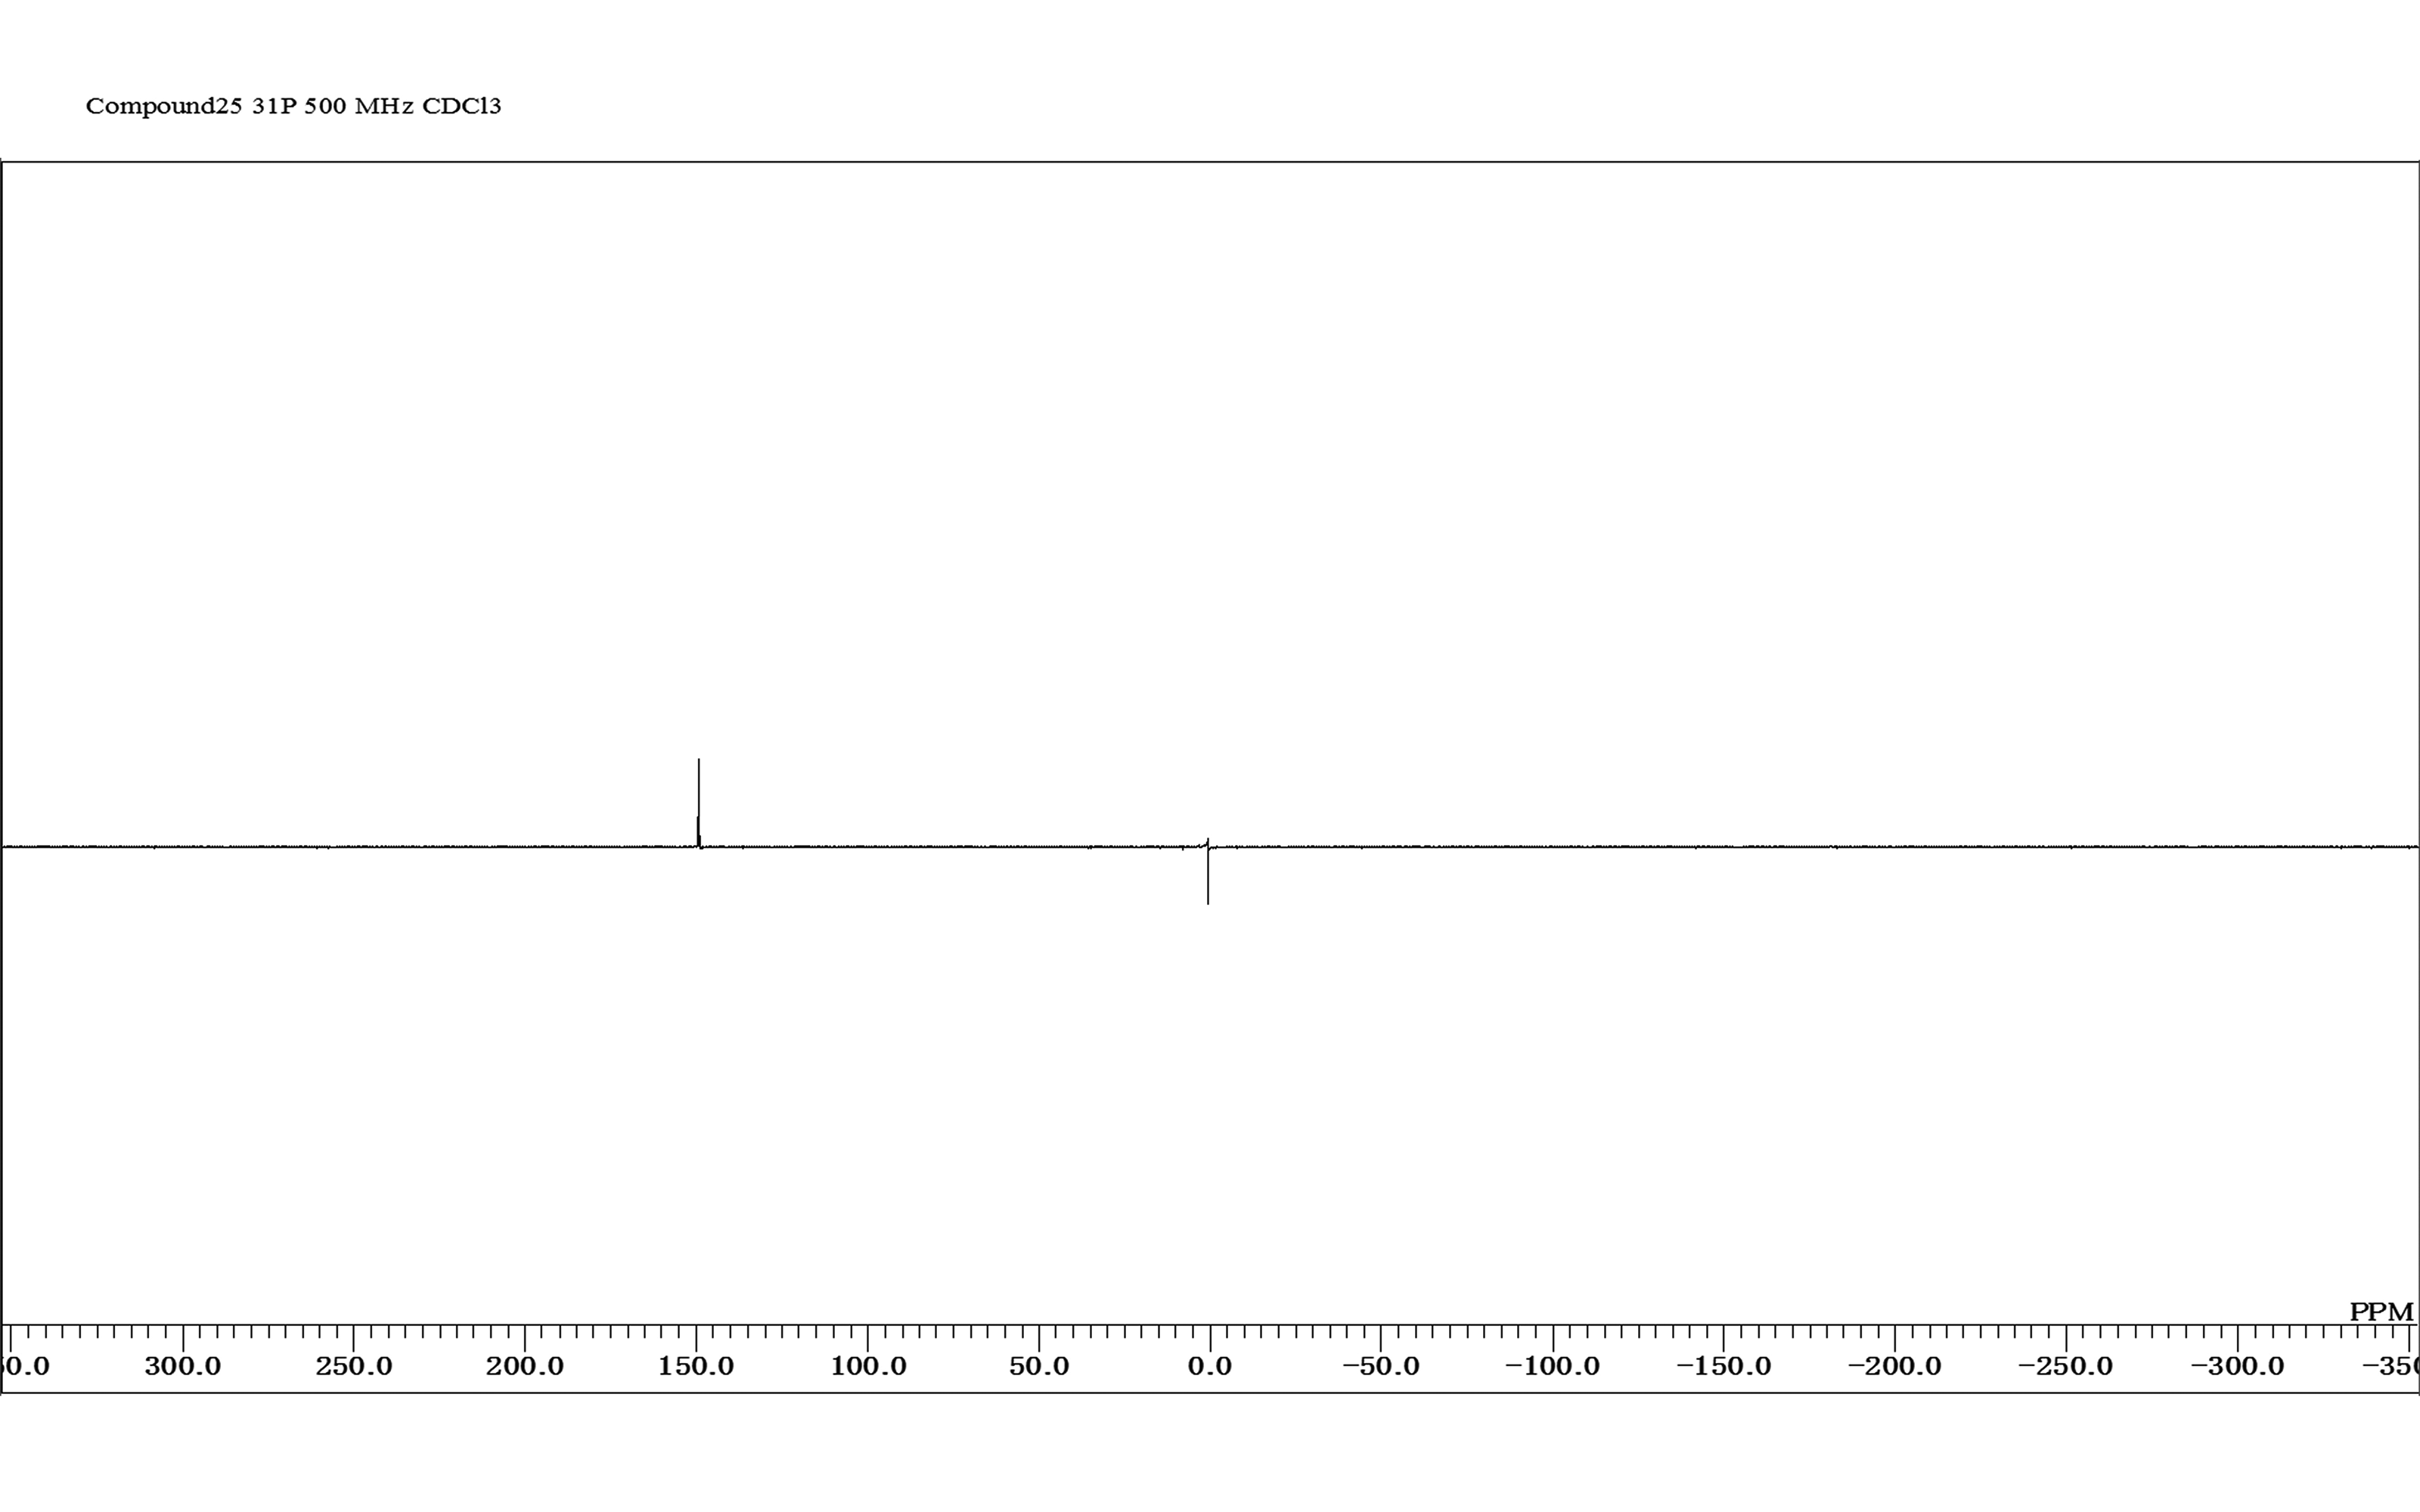


**Figure S43.** 31P-NMR spectrum of compound 25.

2. UV-vis Spectra of dUAz Analogue Modified ONs


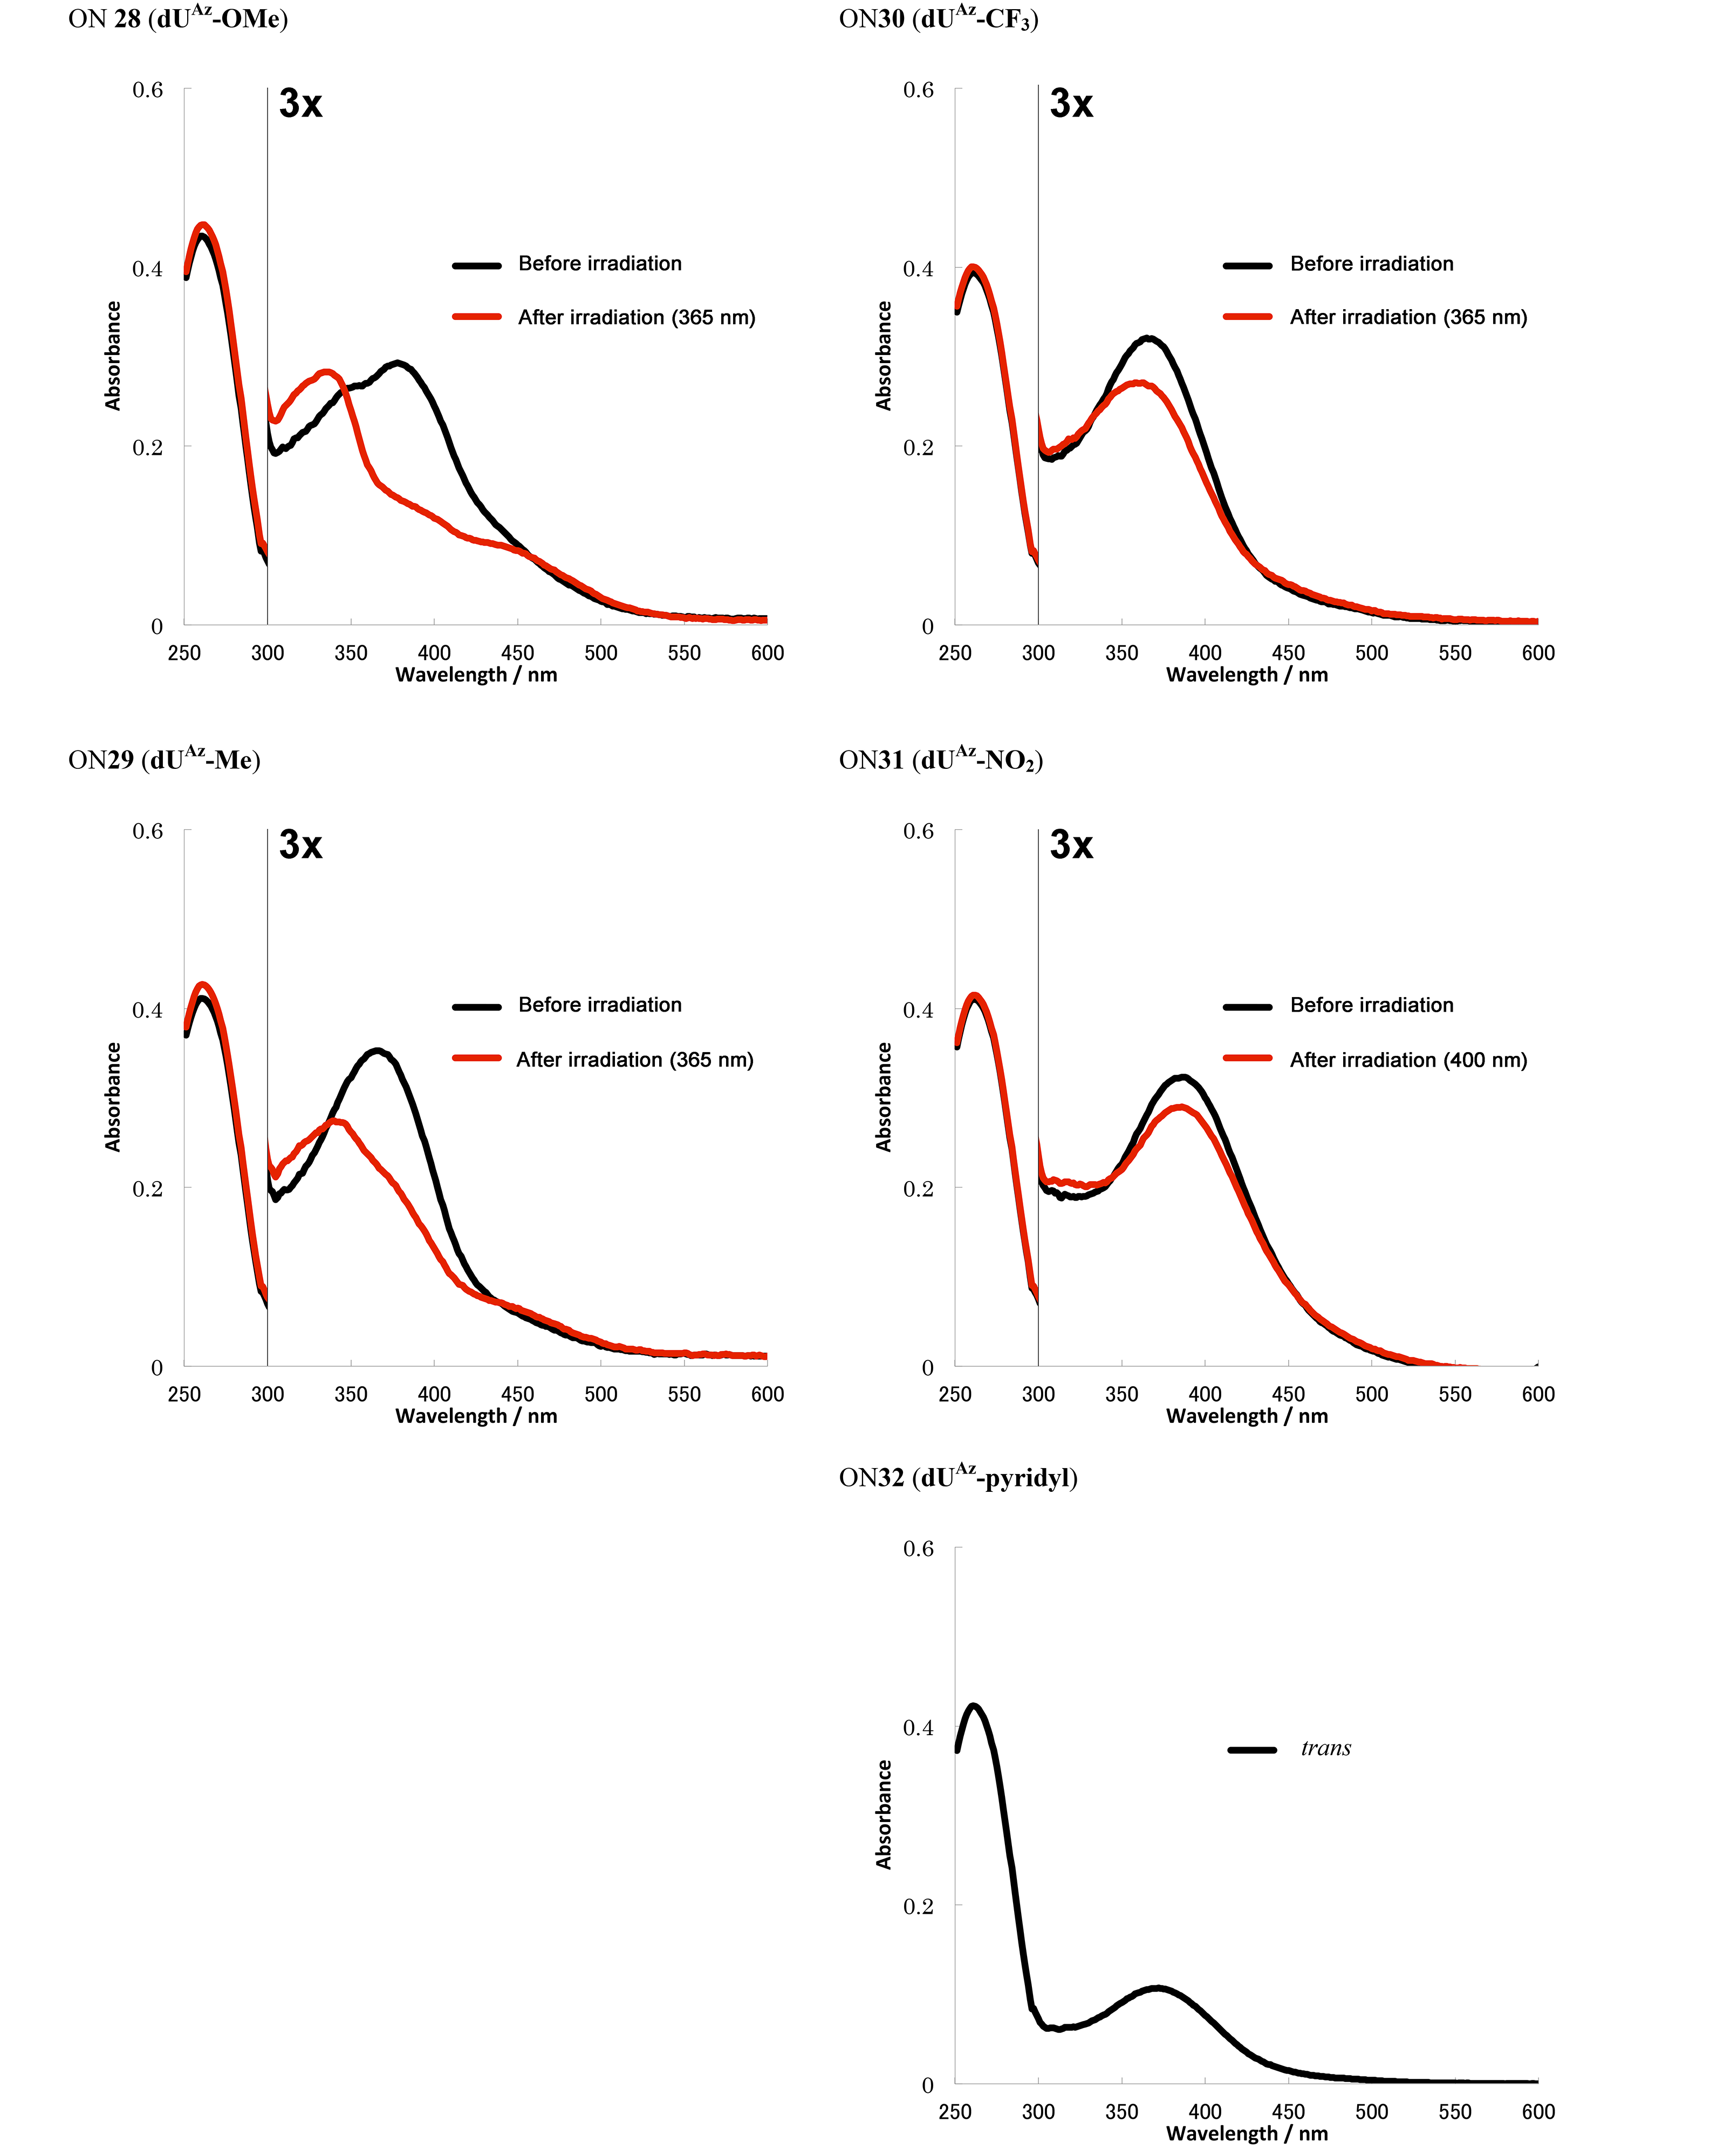


**Figure S44.** Absorbance spectra of dUAz analogue-modified ONs before irradiation
(black line) and after irradiation for 10 s (red line).

3. HPLC and MALDI-TOF MS Analysis of dUAz-Analogue Modified ONs


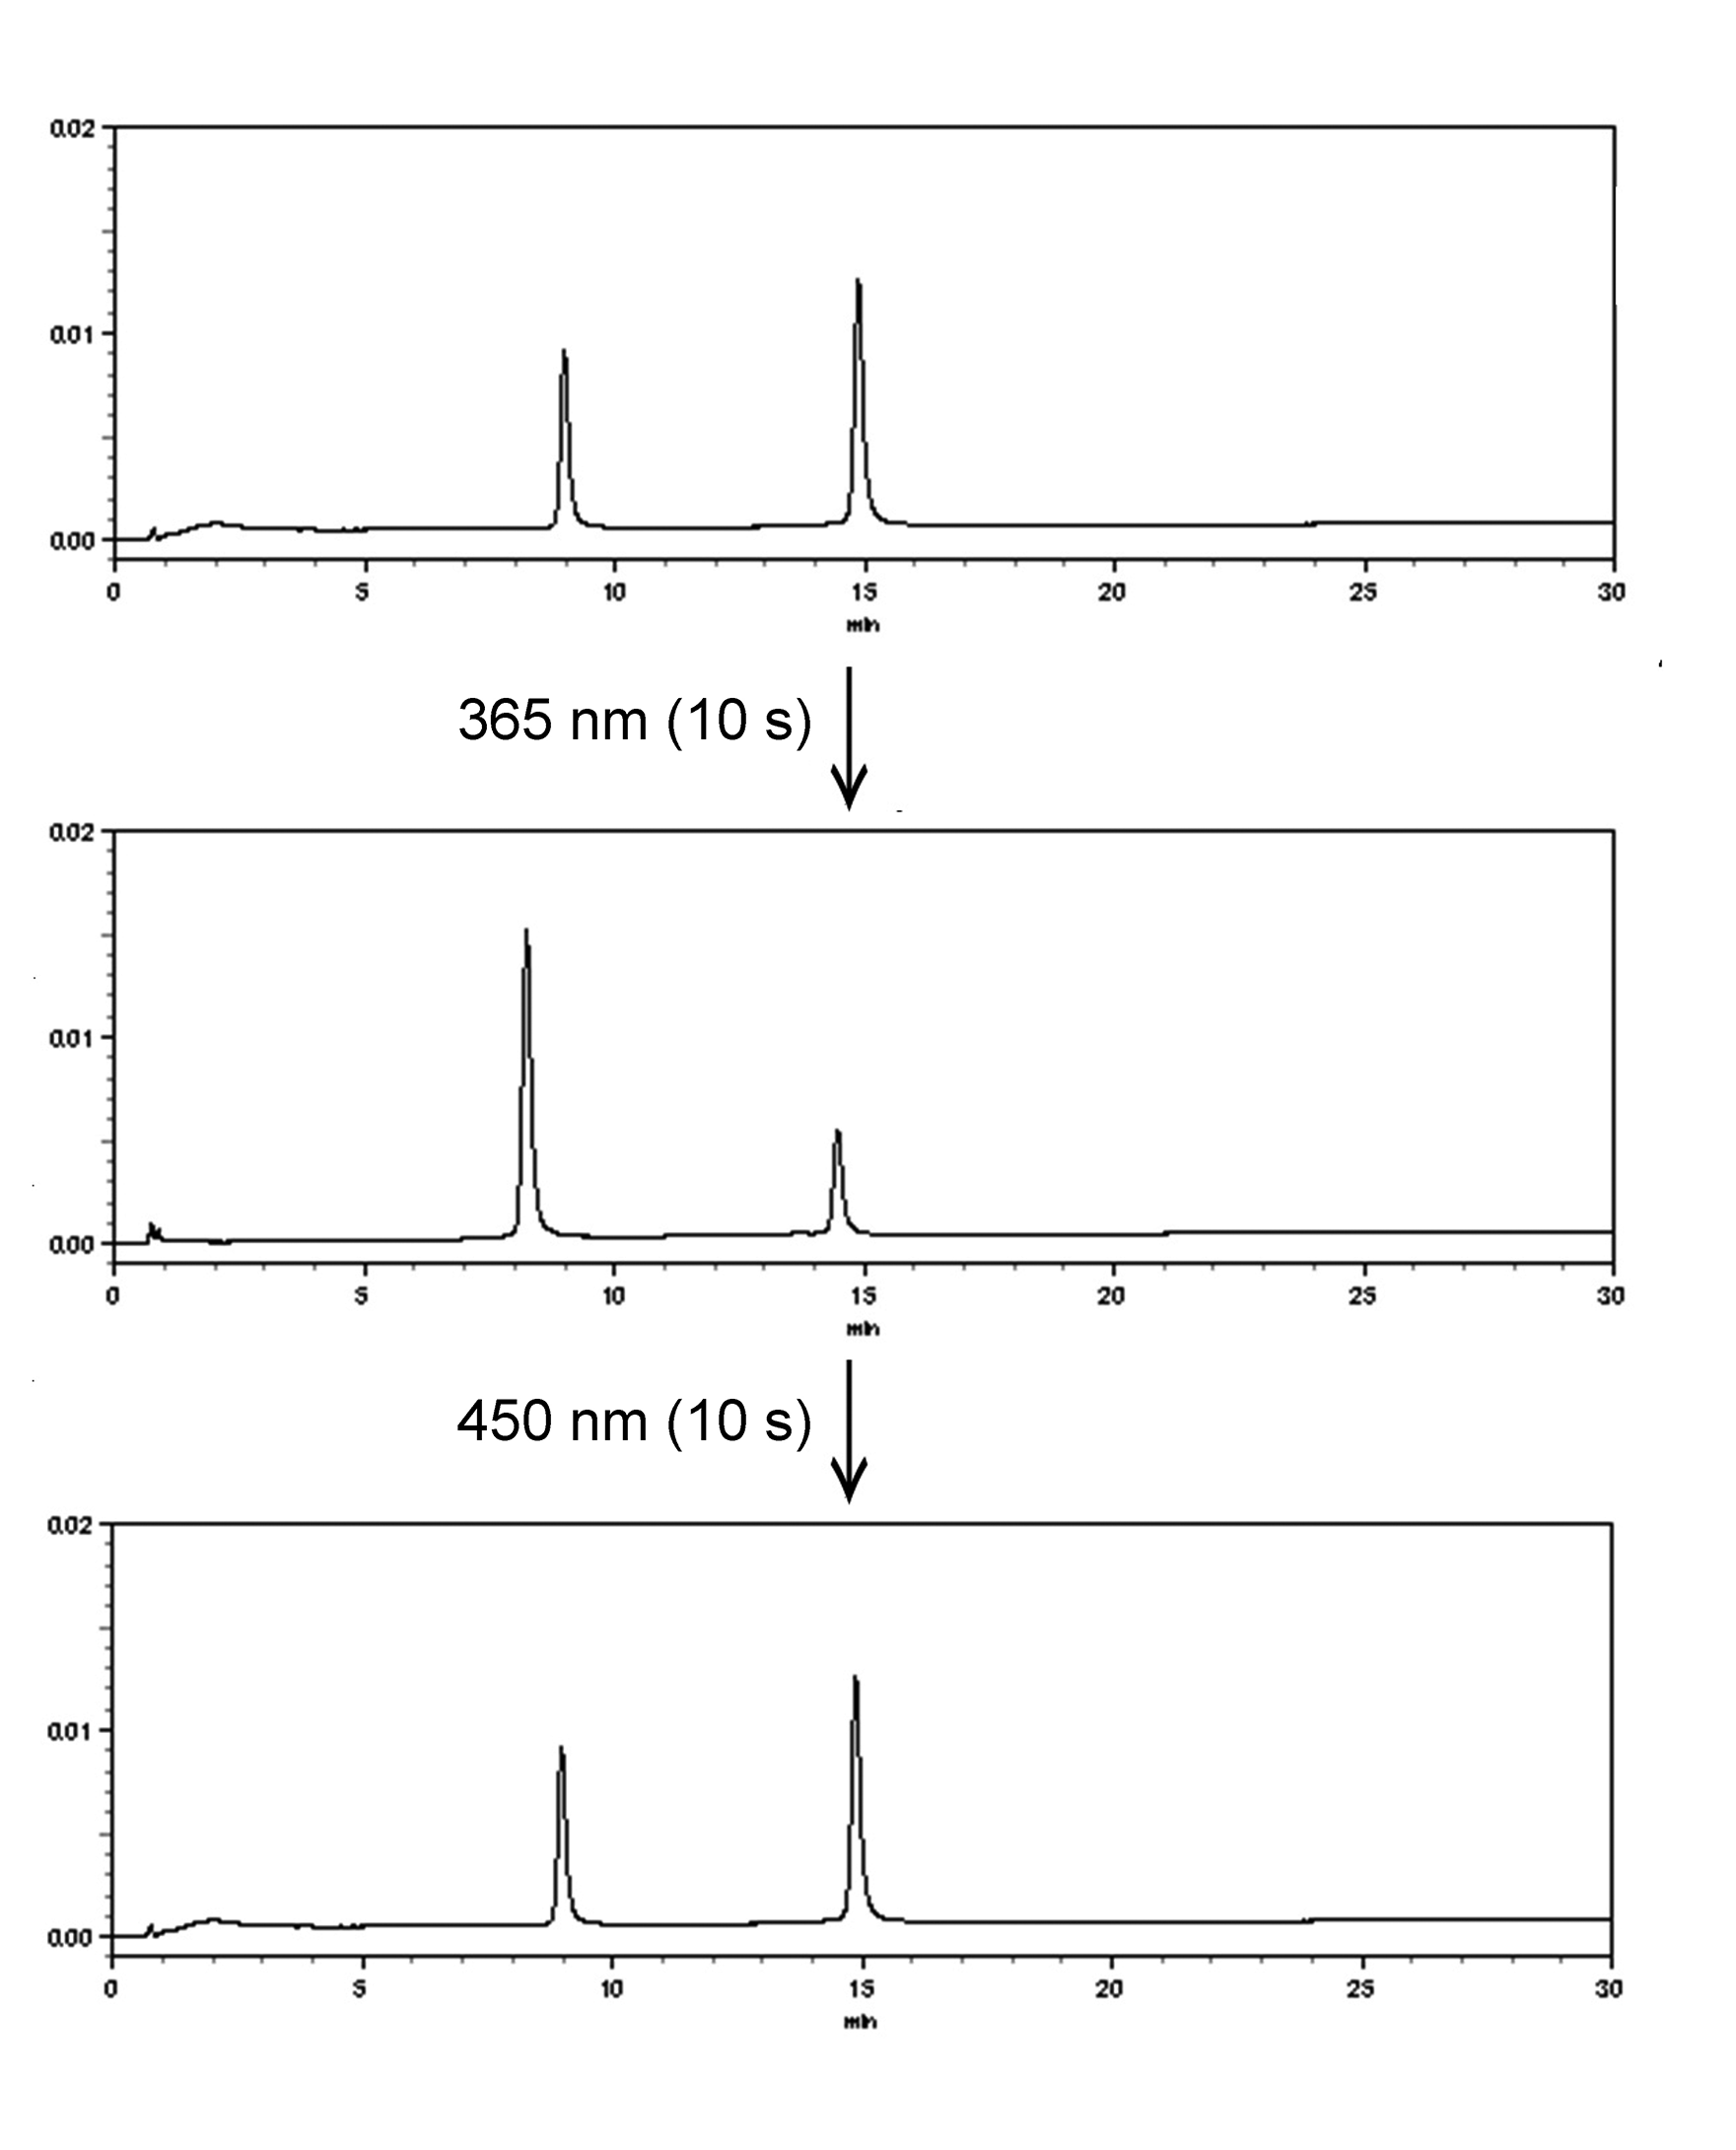


**Figure S45.** ON **28** HPLC: Column: Waters XBridgeTM OST C18 2.5 μm, 4.6 × 50 mm; Gradient: 10%–20% MeCN (over 30 min) in triethylammonium acetate buffer (pH 7.0,
0.1 M); Flow rate: 1.0 mL/min; Column temperature: 37 °C.


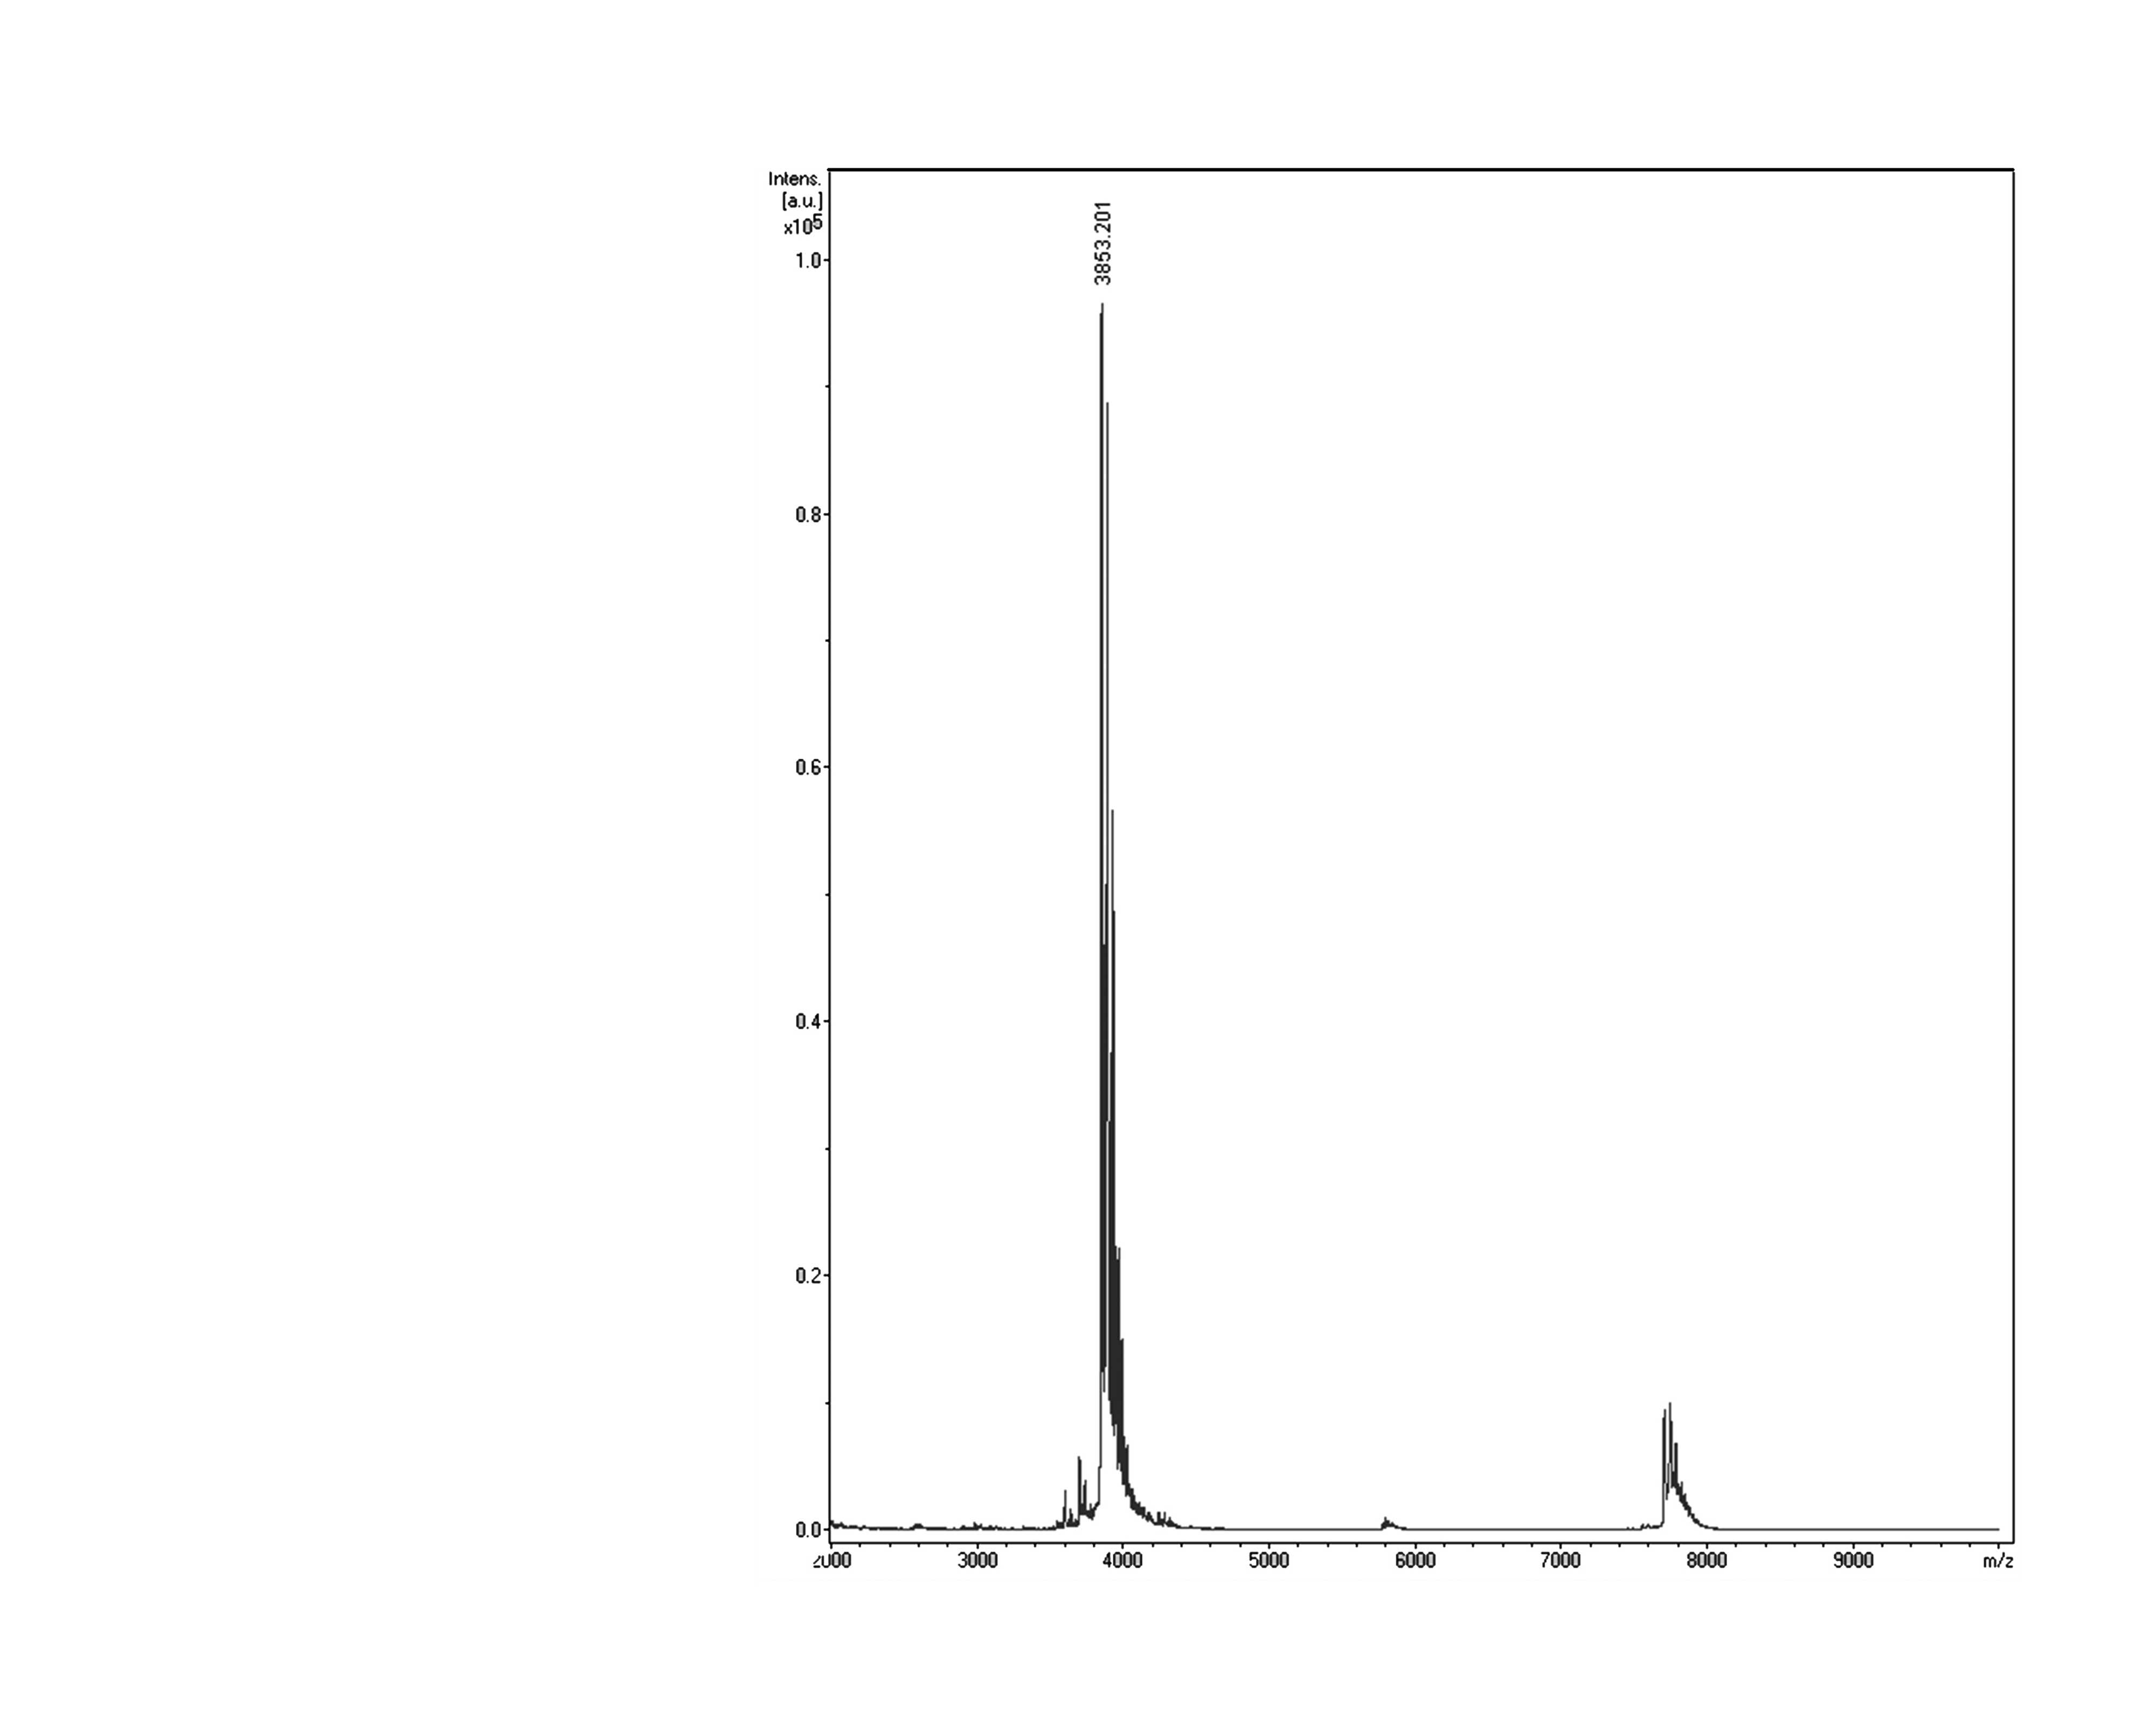


**Figure S46.** MALDI-TOF MS; Calcd. 3852.6 [M-H]−.


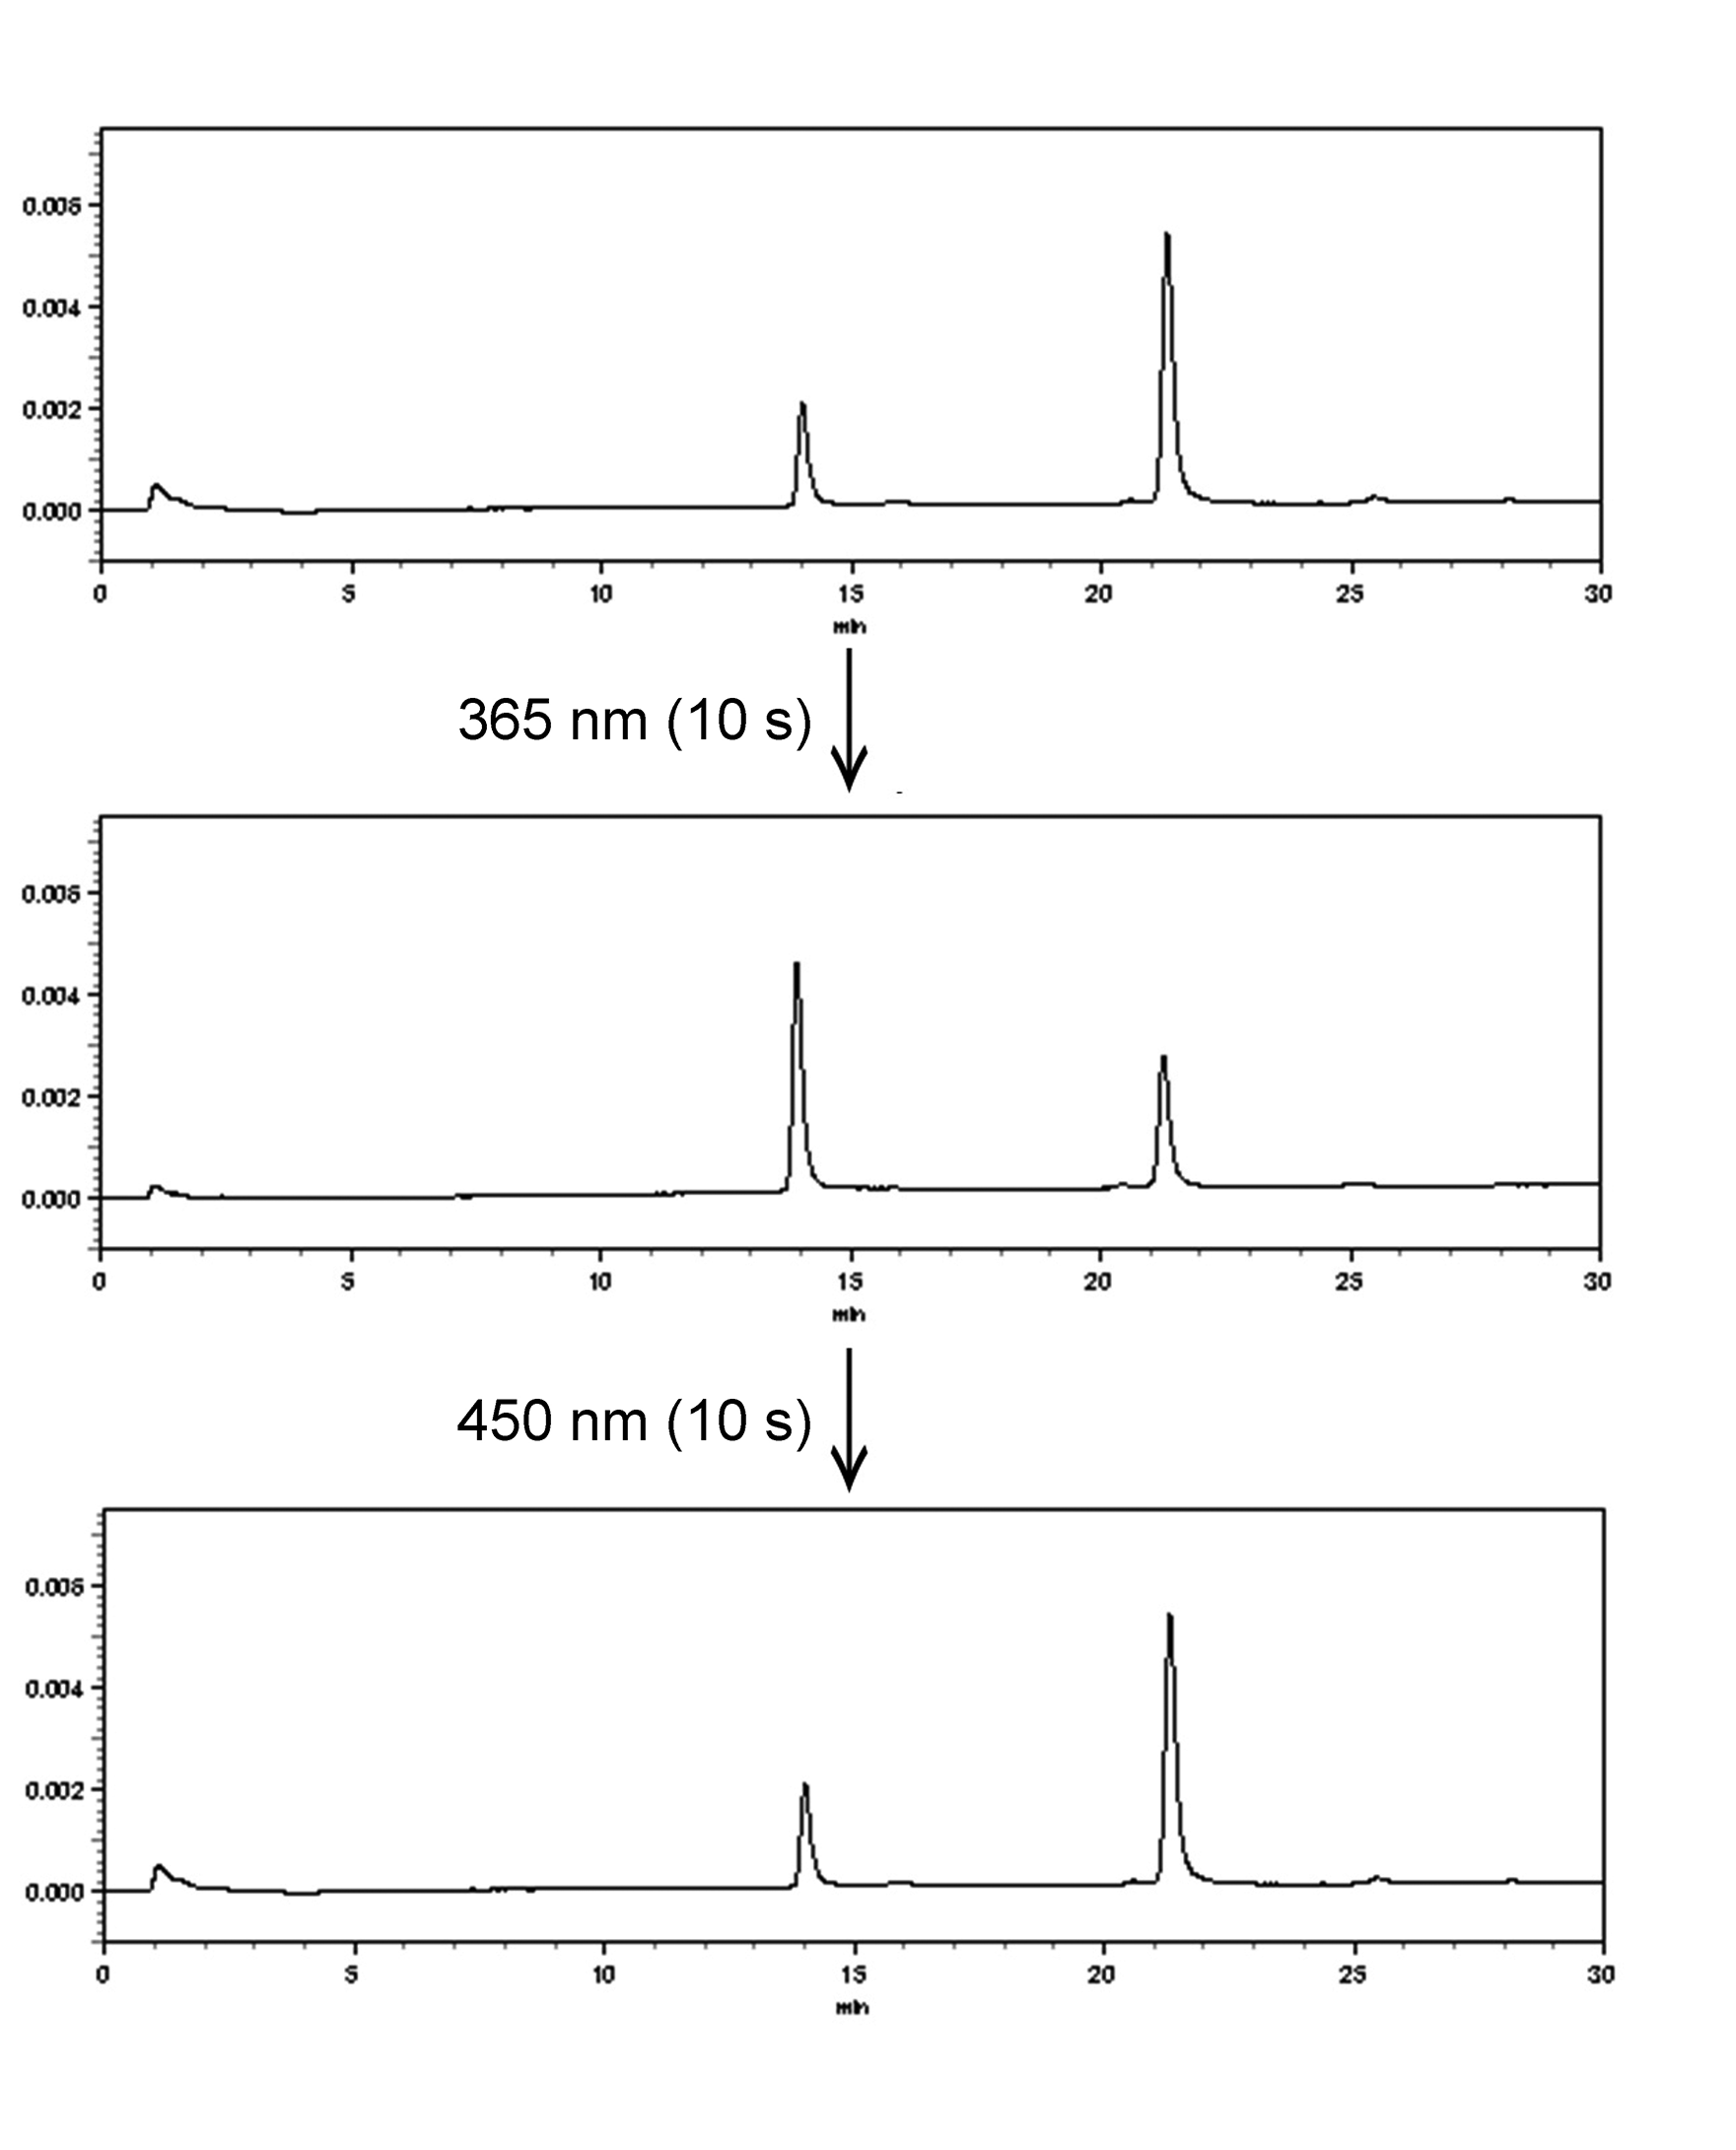


**Figure S47.** ON **29** HPLC: Column: Waters XBridgeTM OST C18 2.5 μm, 4.6 × 50 mm; Gradient: 10%–20% MeCN (over 30 min) in triethylammonium acetate buffer (pH 7.0, 0.1 M); Flow rate: 1.0 mL/min; Column temperature: 37 °C.


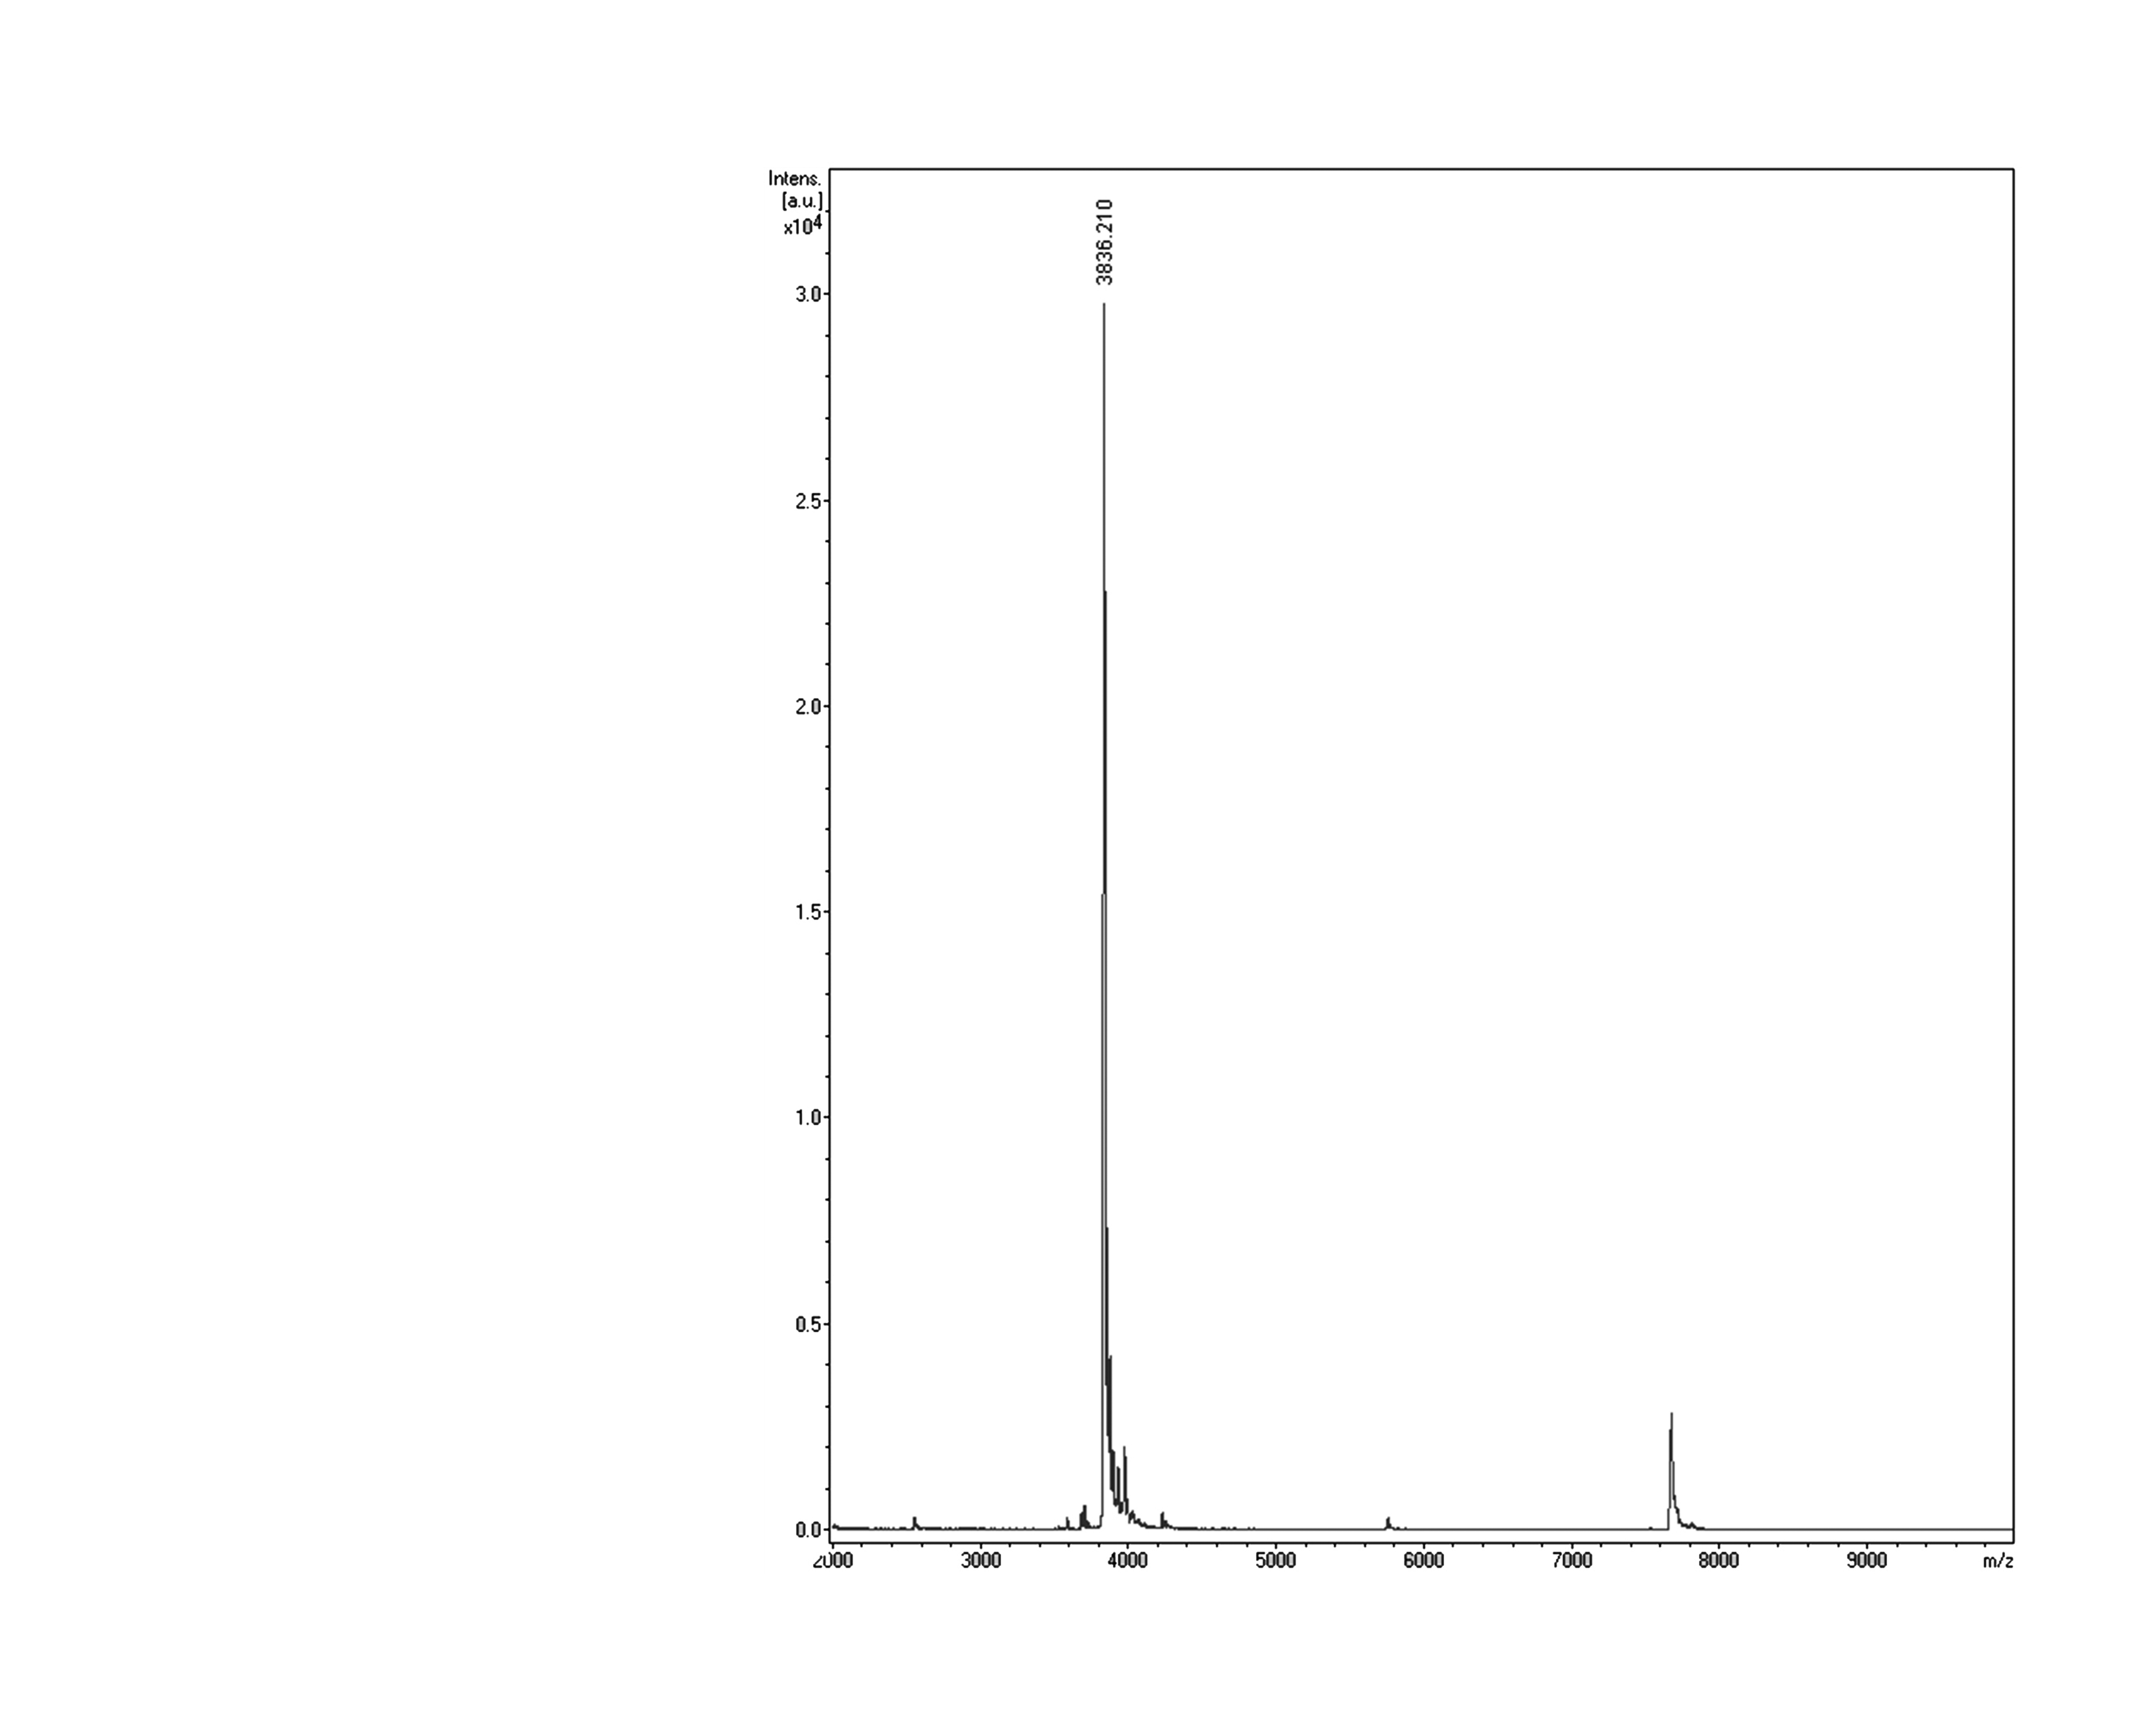


**Figure S48.** MALDI-TOF MS; Calcd. 3836.6 [M-H]−.


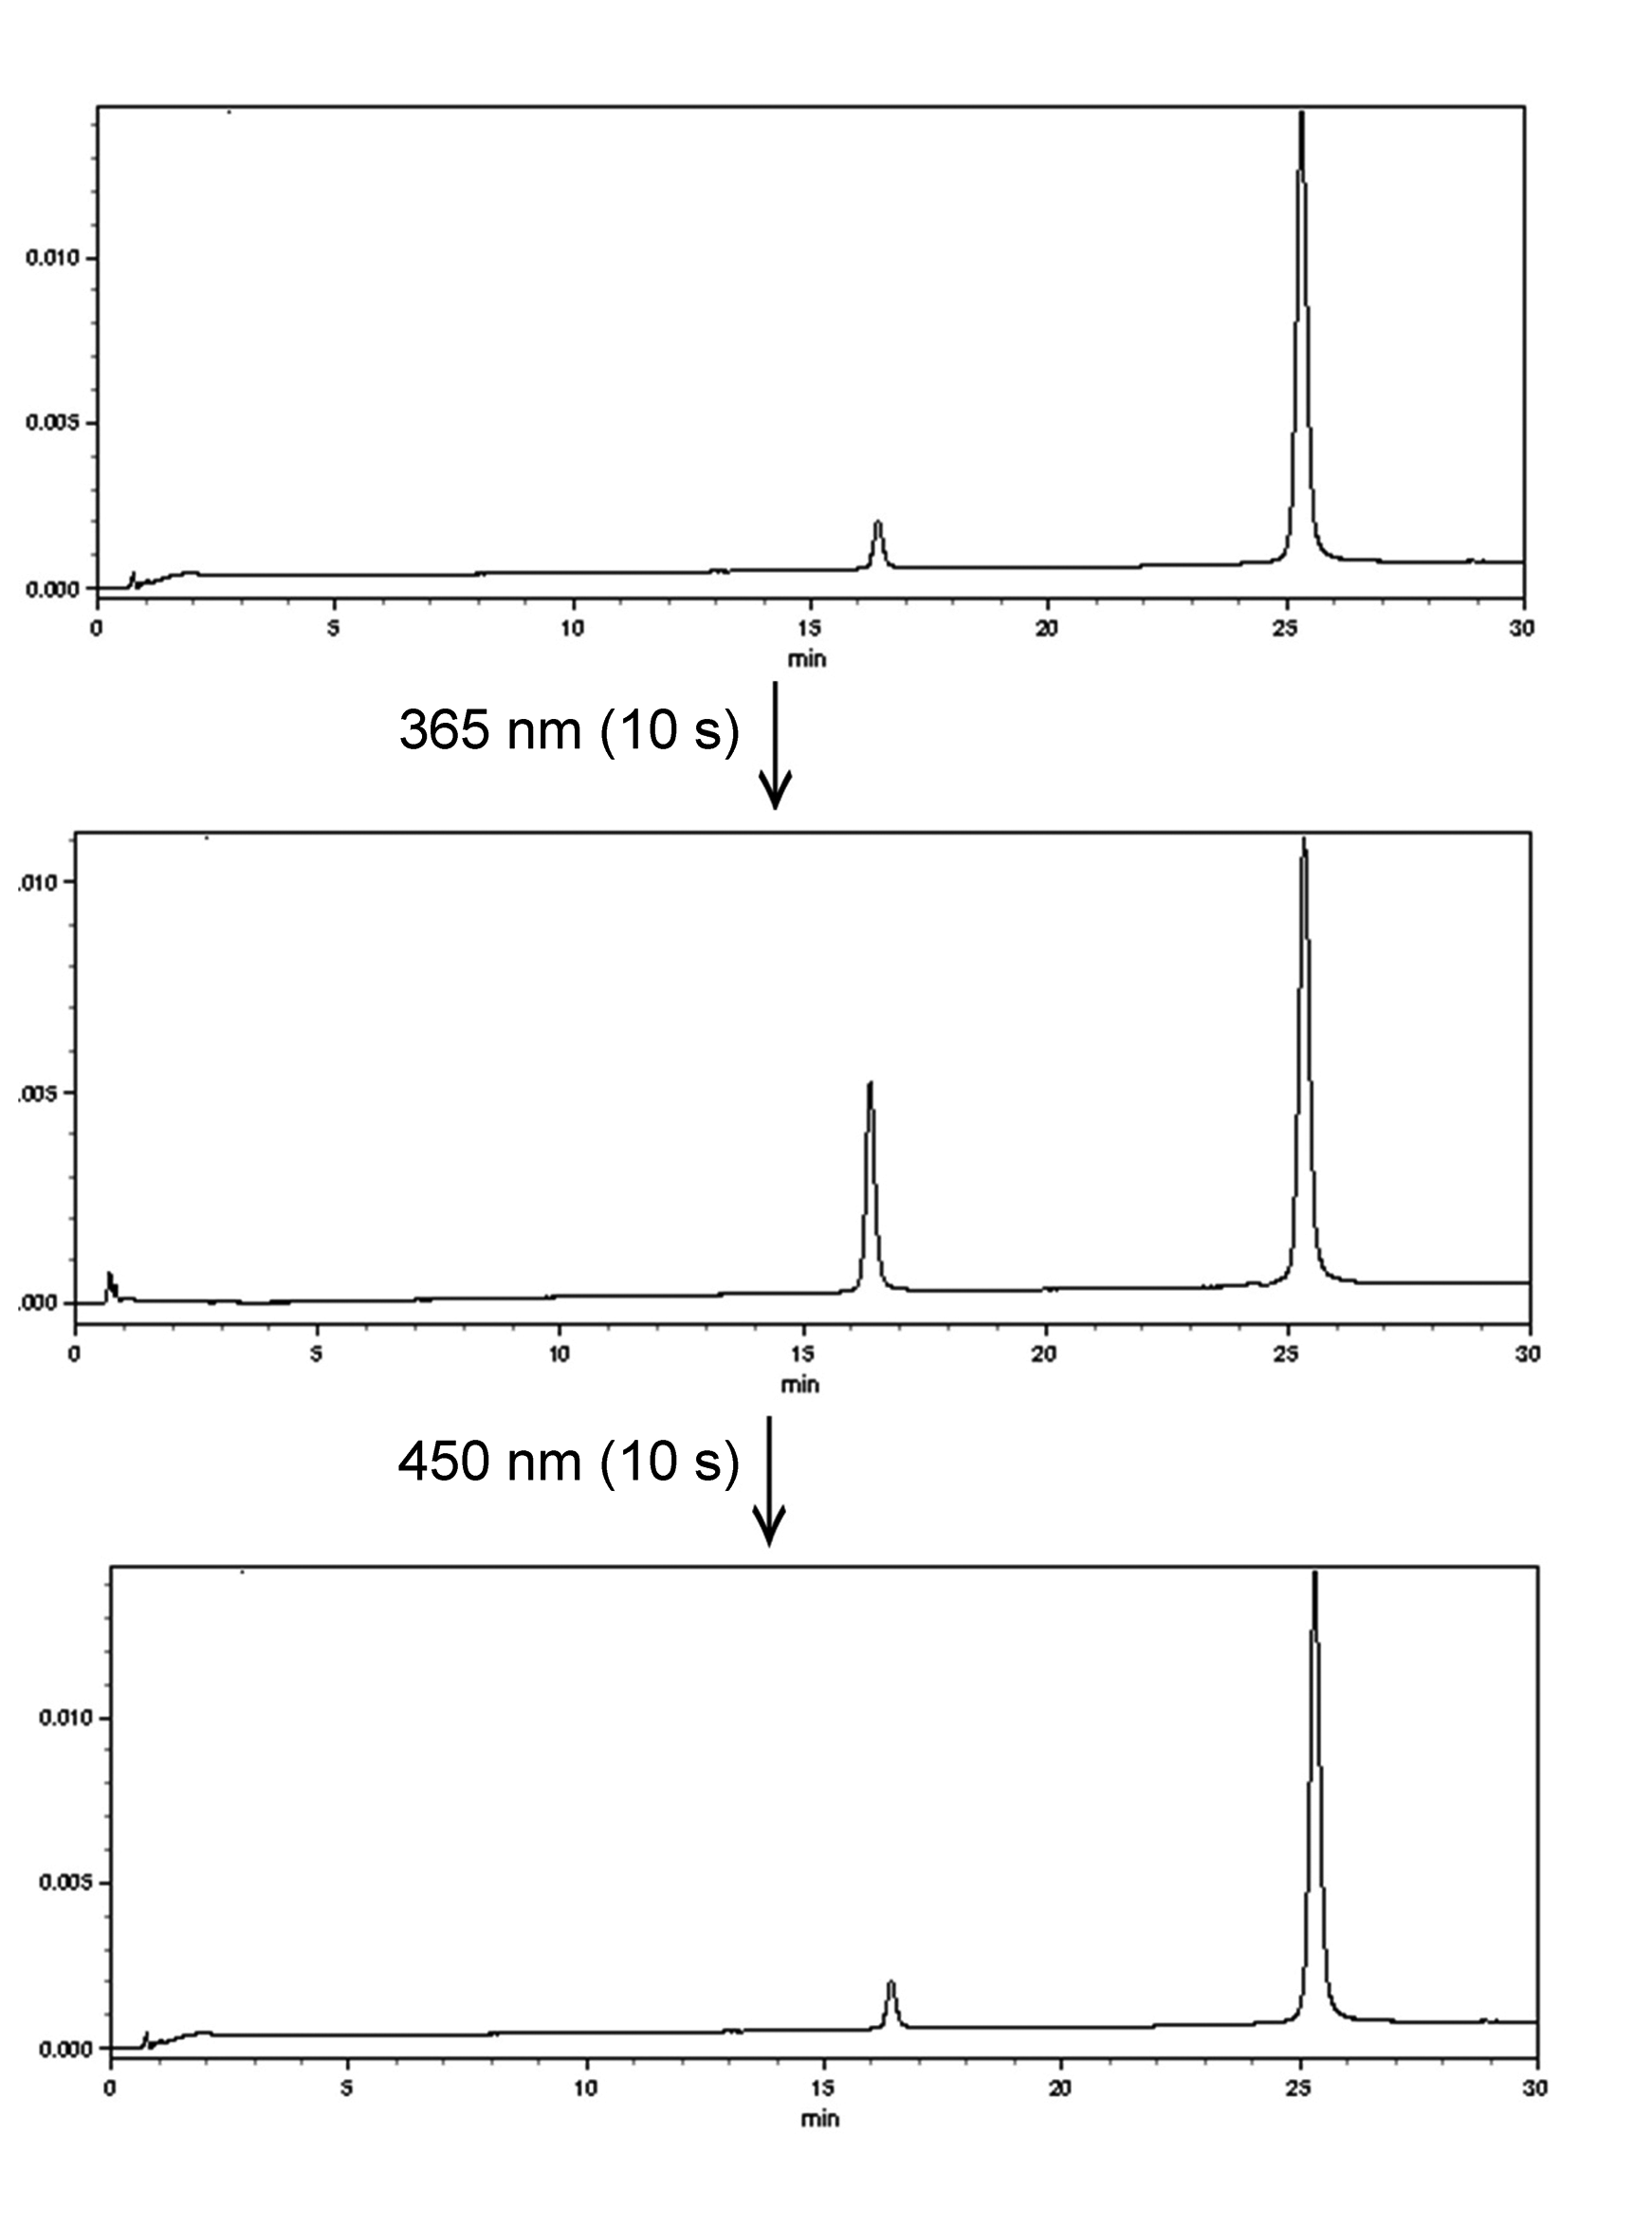


**Figure S49.** ON **30** HPLC: Column: Waters XBridgeTM OST C18 2.5 μm, 4.6 × 50 mm; Gradient: 10%–20% MeCN (over 30 min) in triethylammonium acetate buffer (pH 7.0, 0.1 M); Flow rate: 1.0 mL/min; Column temperature: 37 °C.


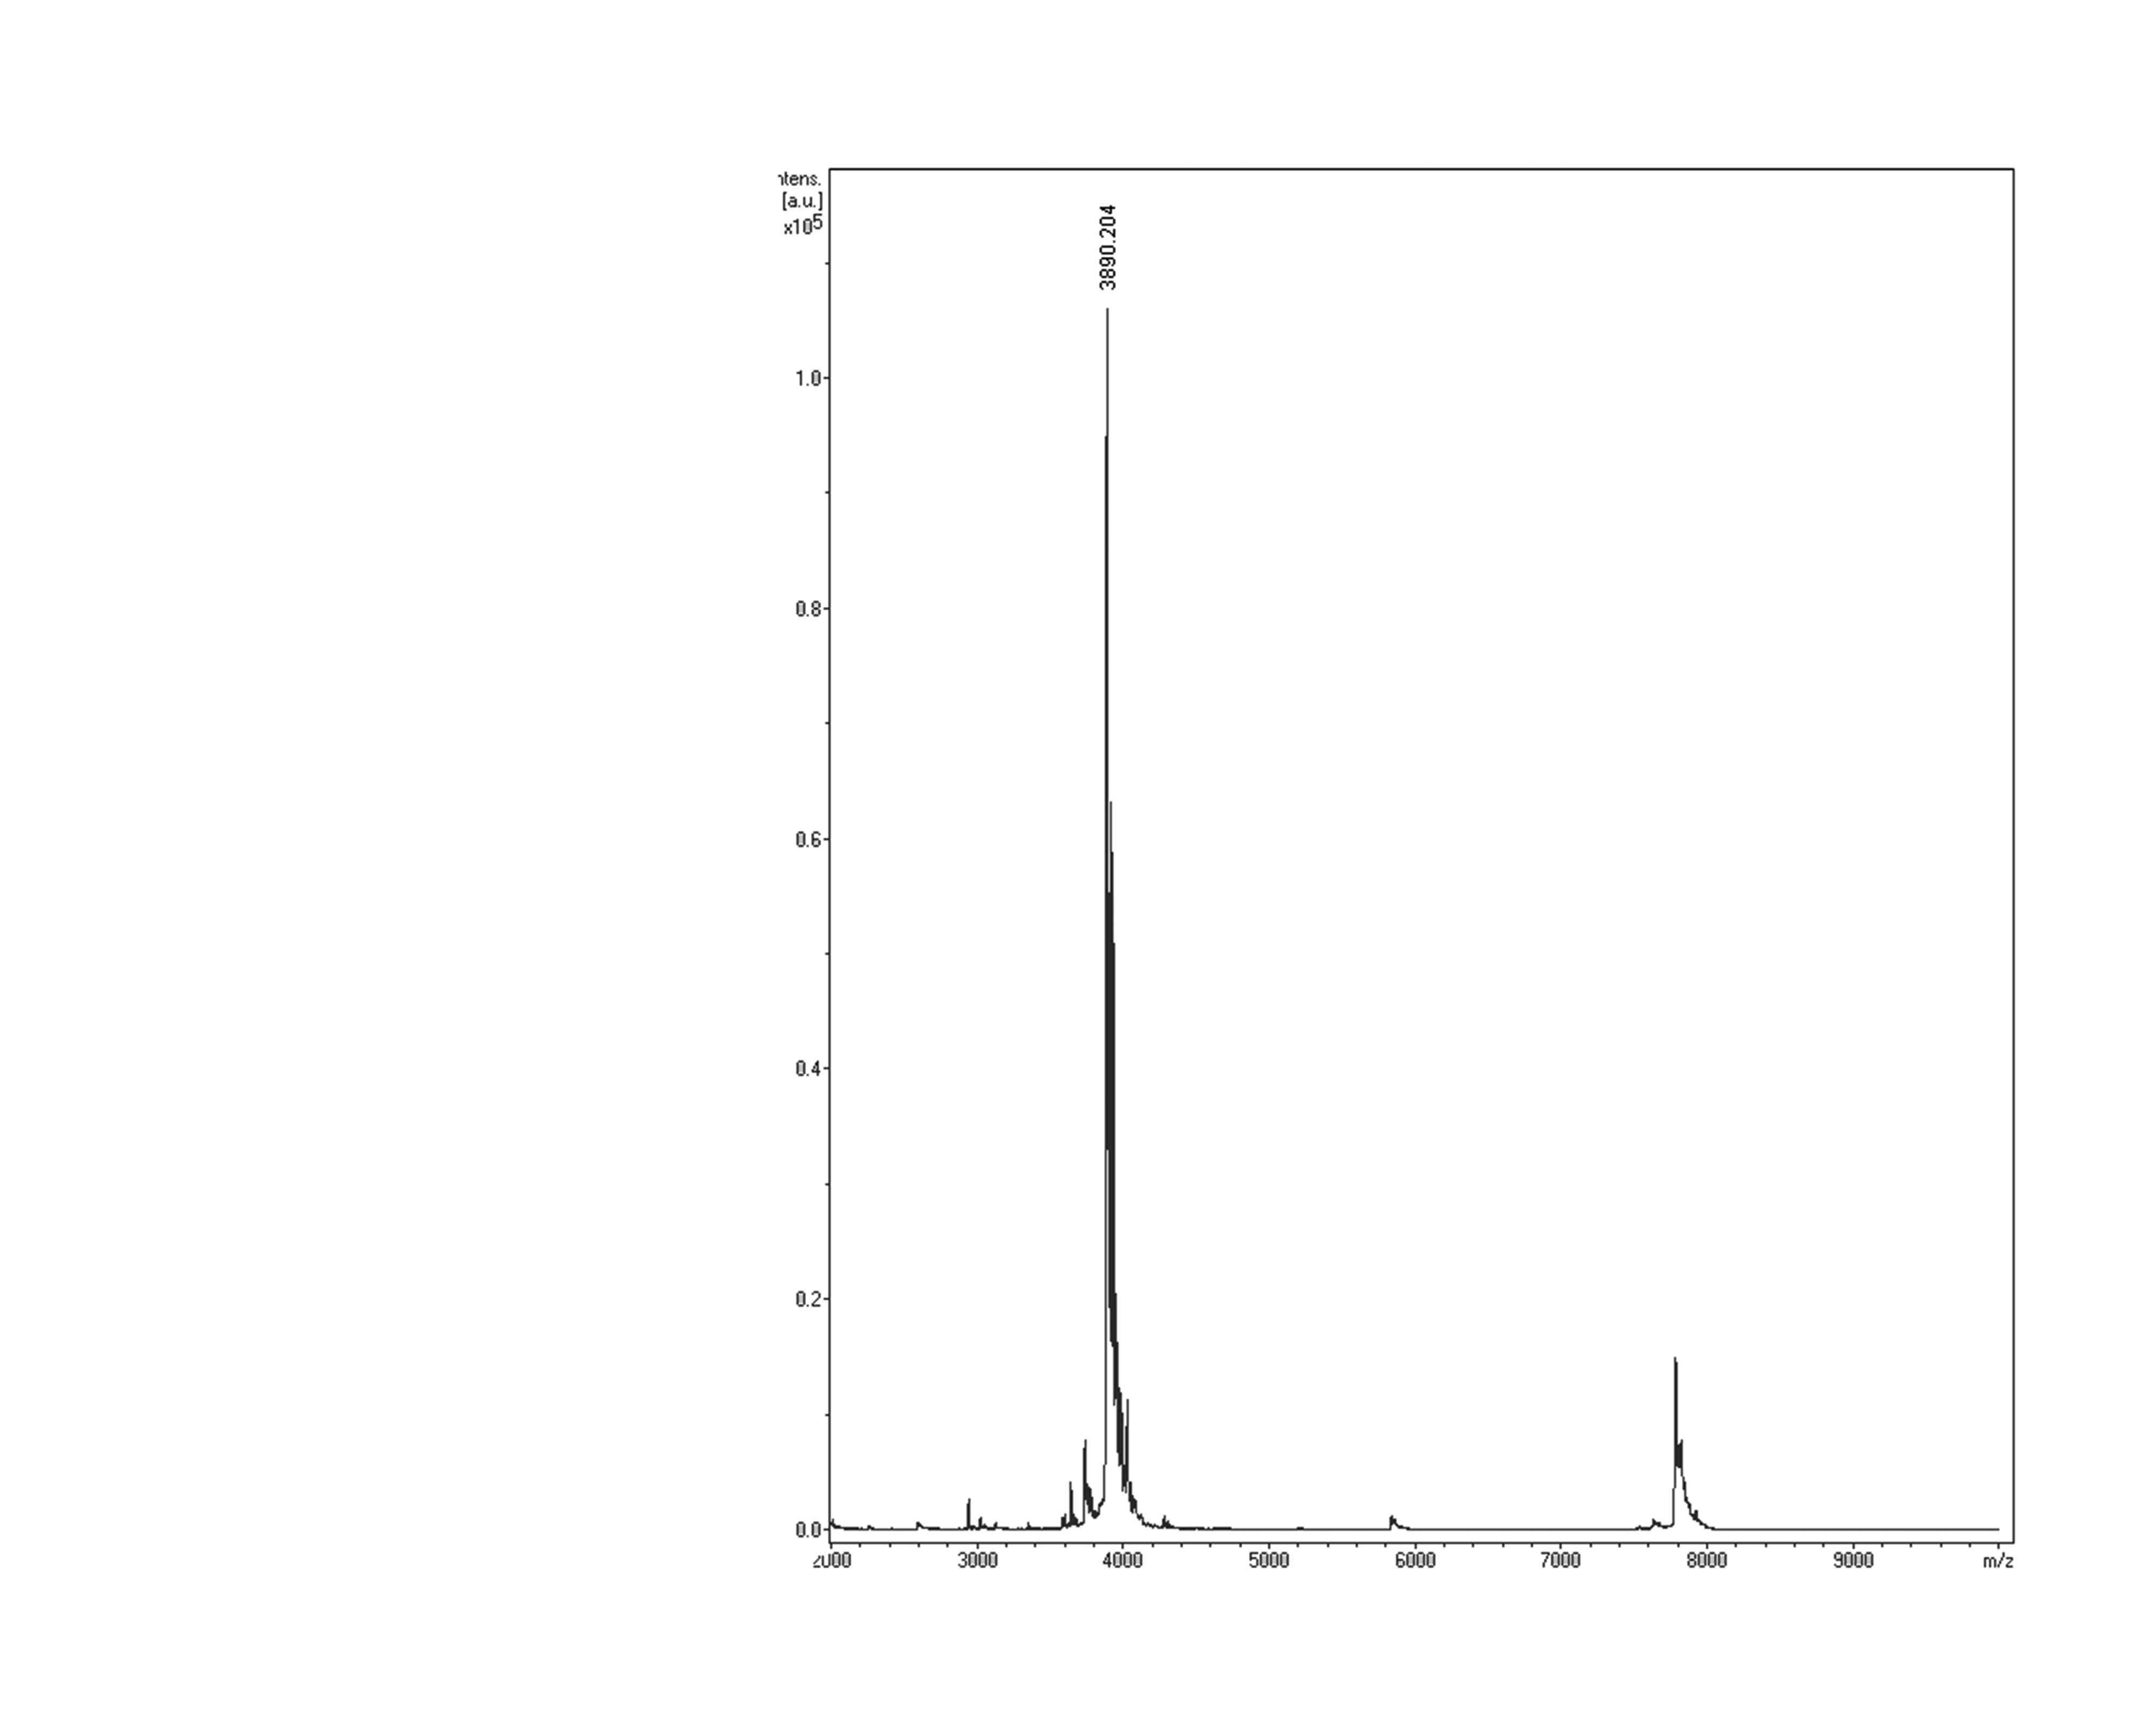


**Figure S50.** MALDI-TOF MS; Calcd. 3890.6 [M-H]−.

**
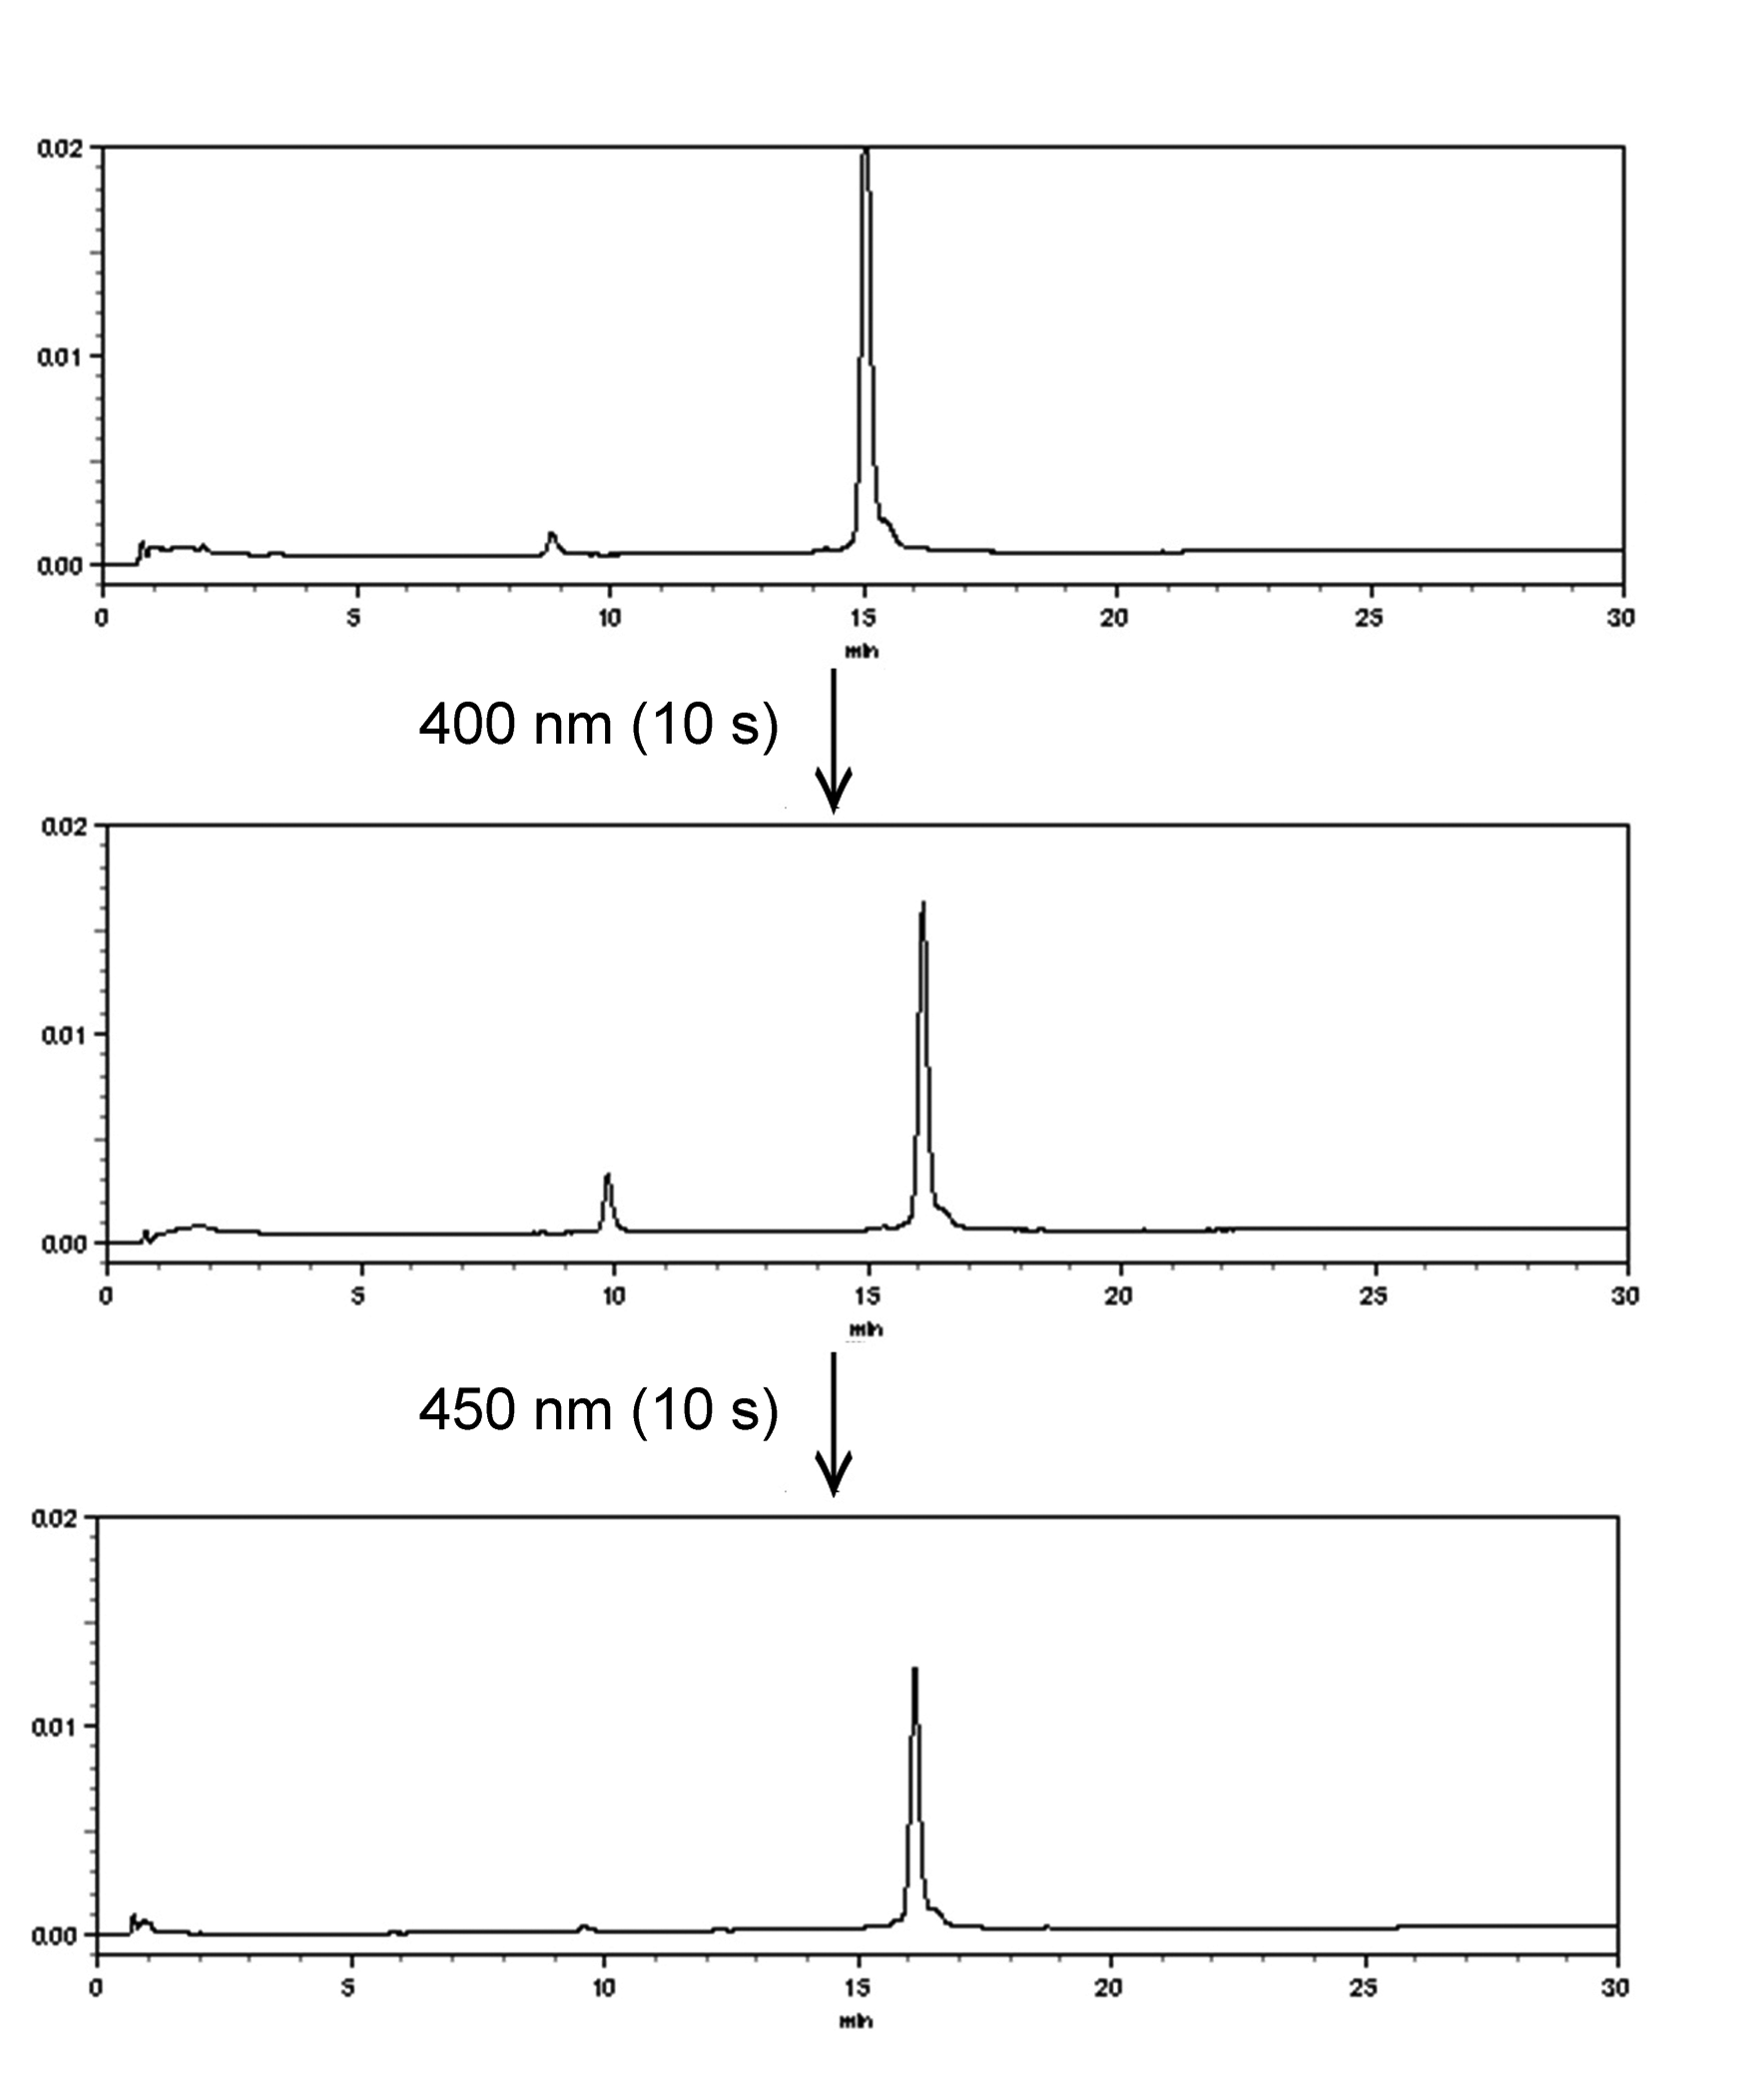
**

**Figure S51.** ON **31** HPLC: Column: Waters XBridgeTM OST C18 2.5 μm, 4.6 × 50 mm; Gradient: 20%–30% MeCN (over 30 min) in triethylammonium acetate buffer (pH 7.0, 0.1 M); Flow rate: 1.0 mL/min; Column temperature: 37 °C.


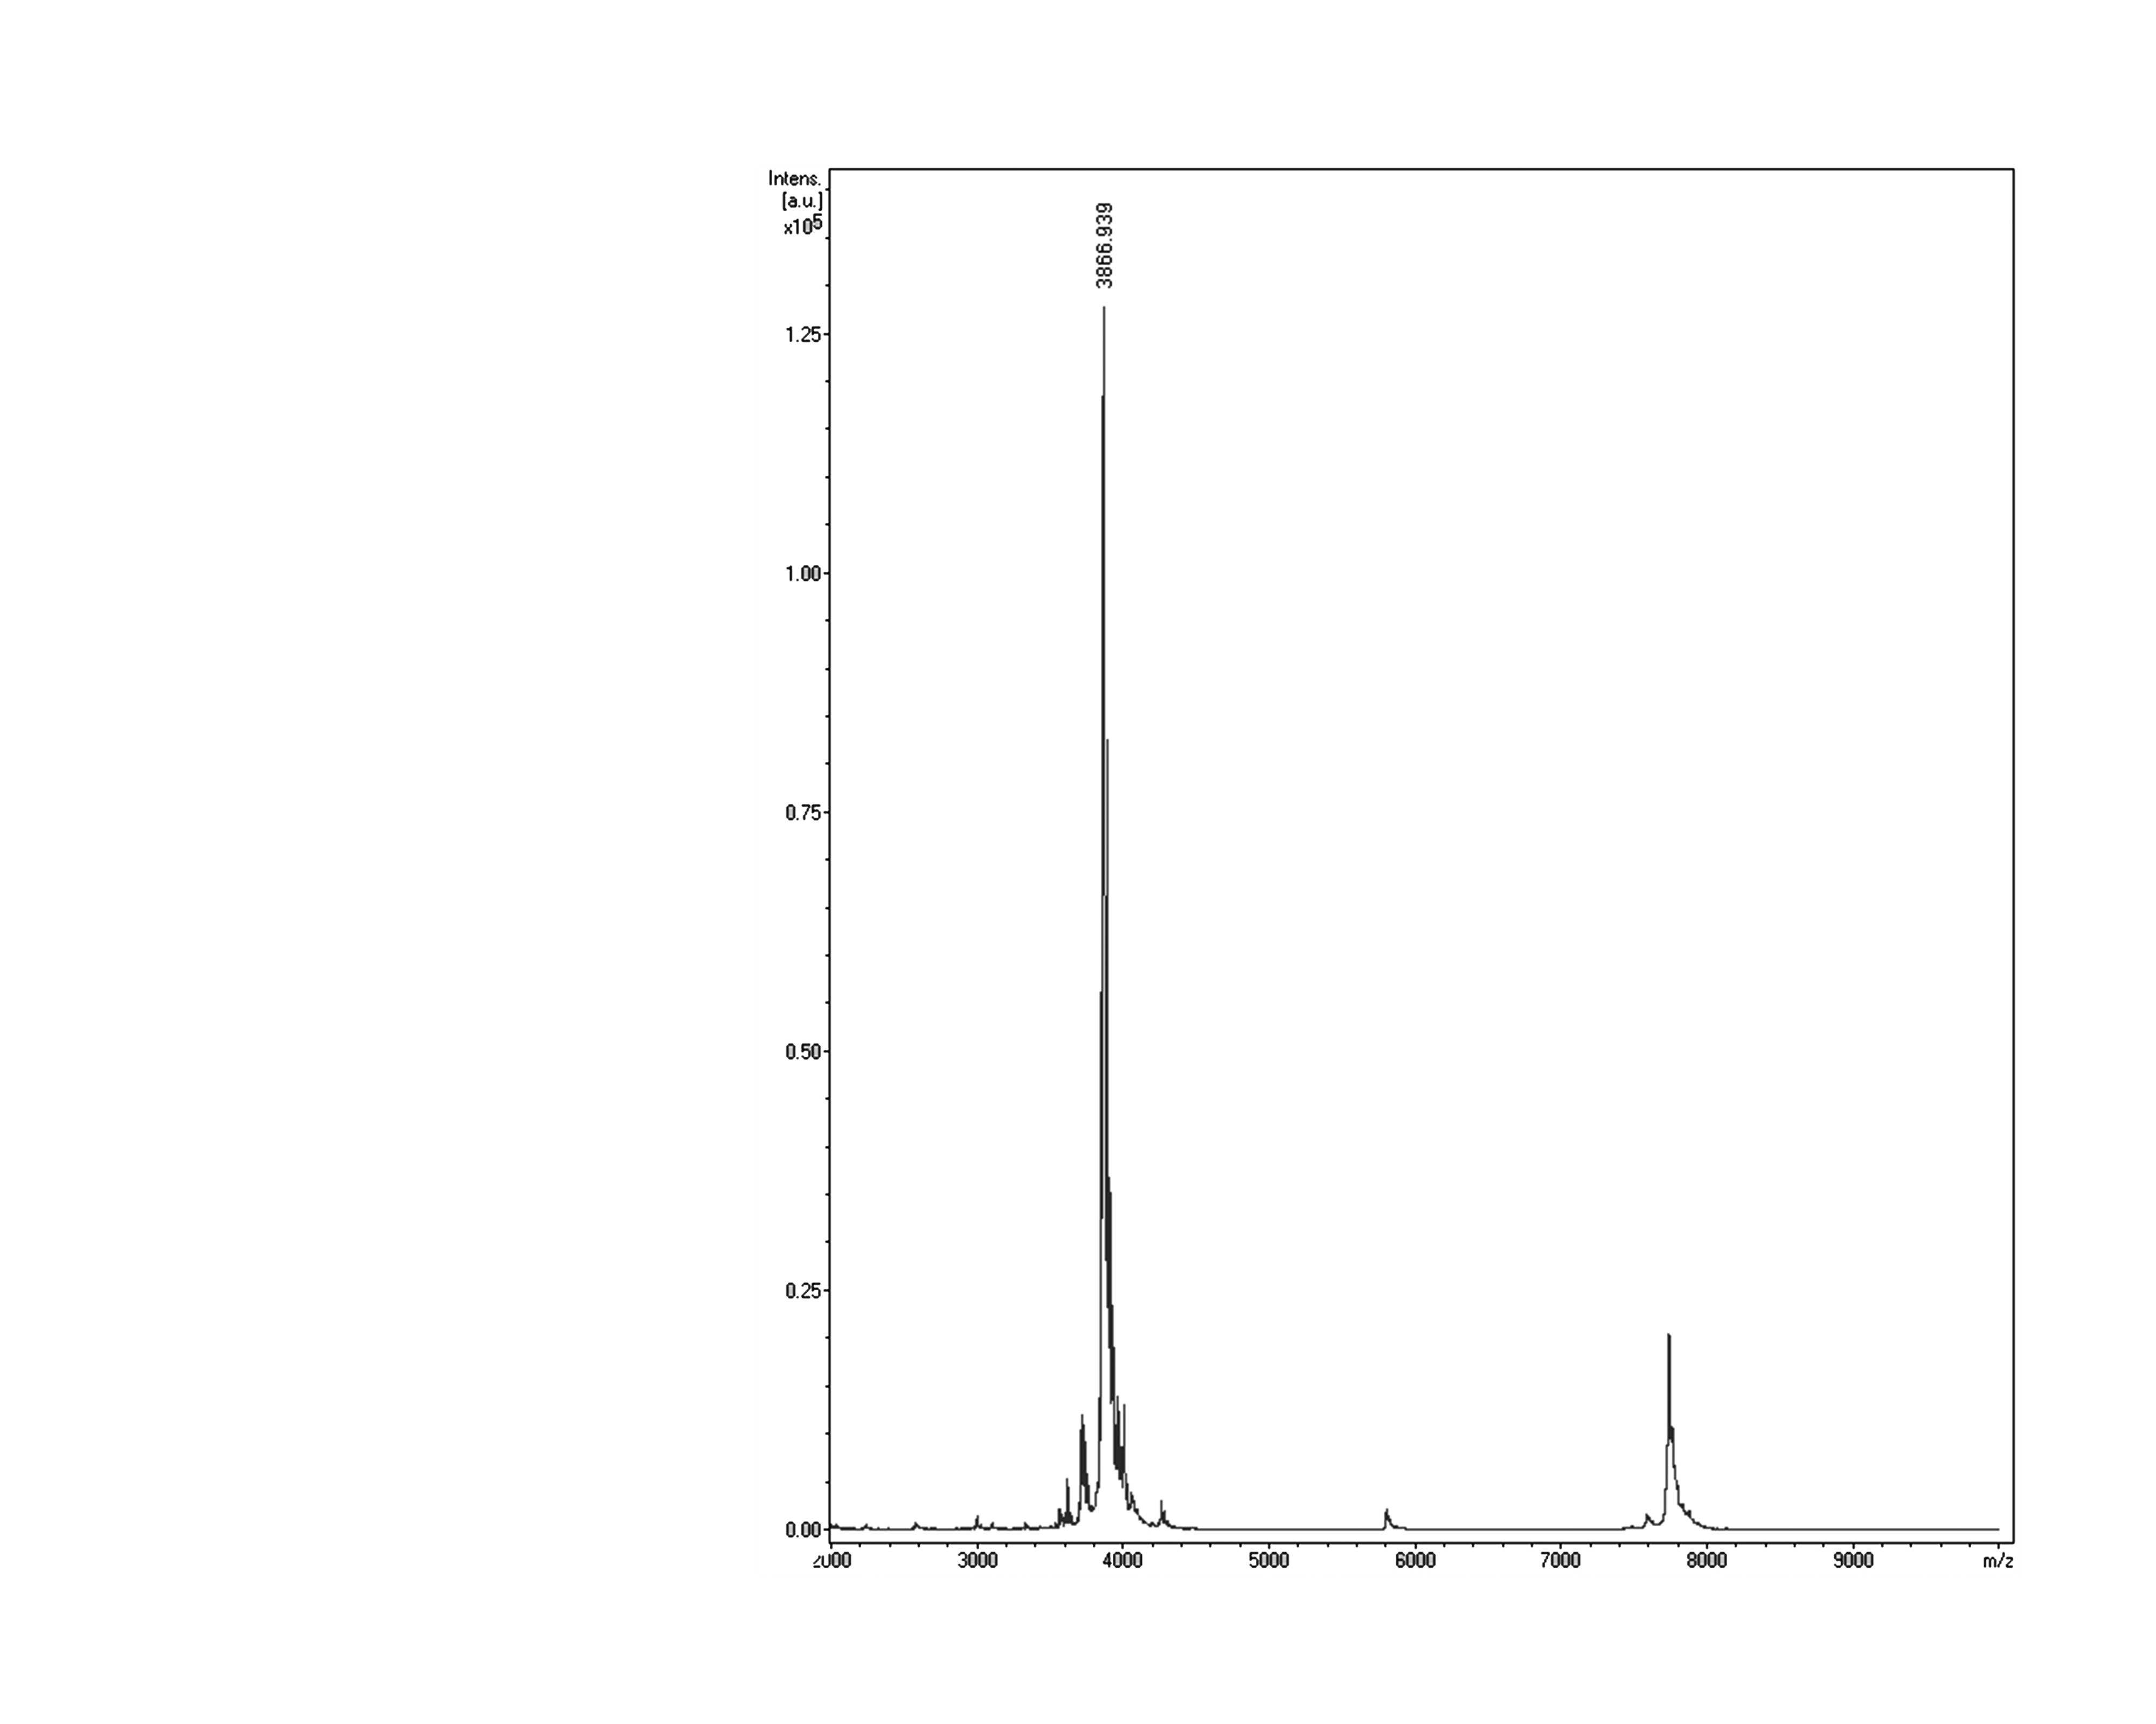


**Figure S52.** MALDI-TOF MS; Calcd. 3866.6 [M-H]−.


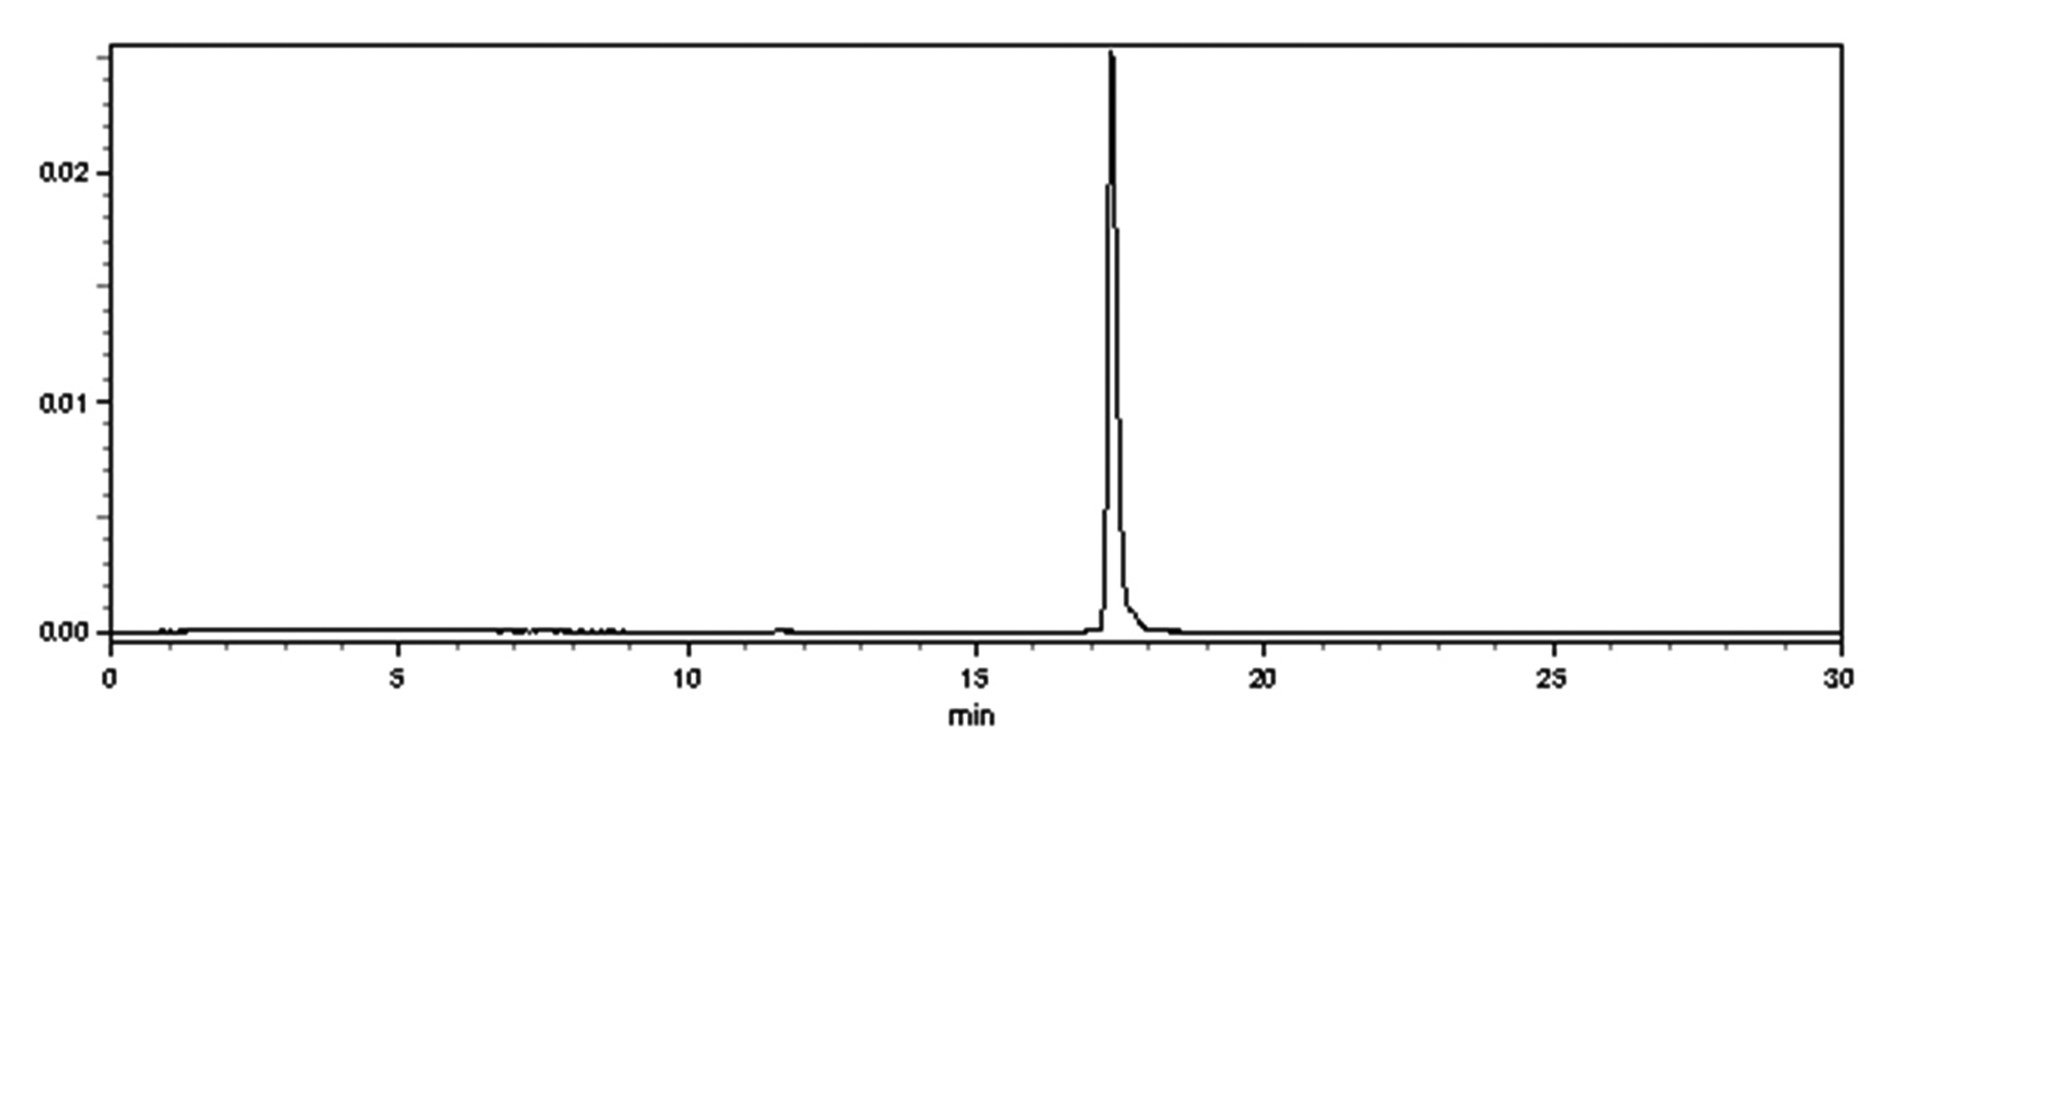


**Figure S53.** ON **32** HPLC: Column: Waters XBridgeTM OST C18 2.5 μm, 4.6 × 50 mm; Gradient: 5%–20% MeCN (over 30 min) in triethylammonium acetate buffer (pH 7.0, 0.1 M); Flow rate: 1.0 mL/min; Column temperature: 37 °C.


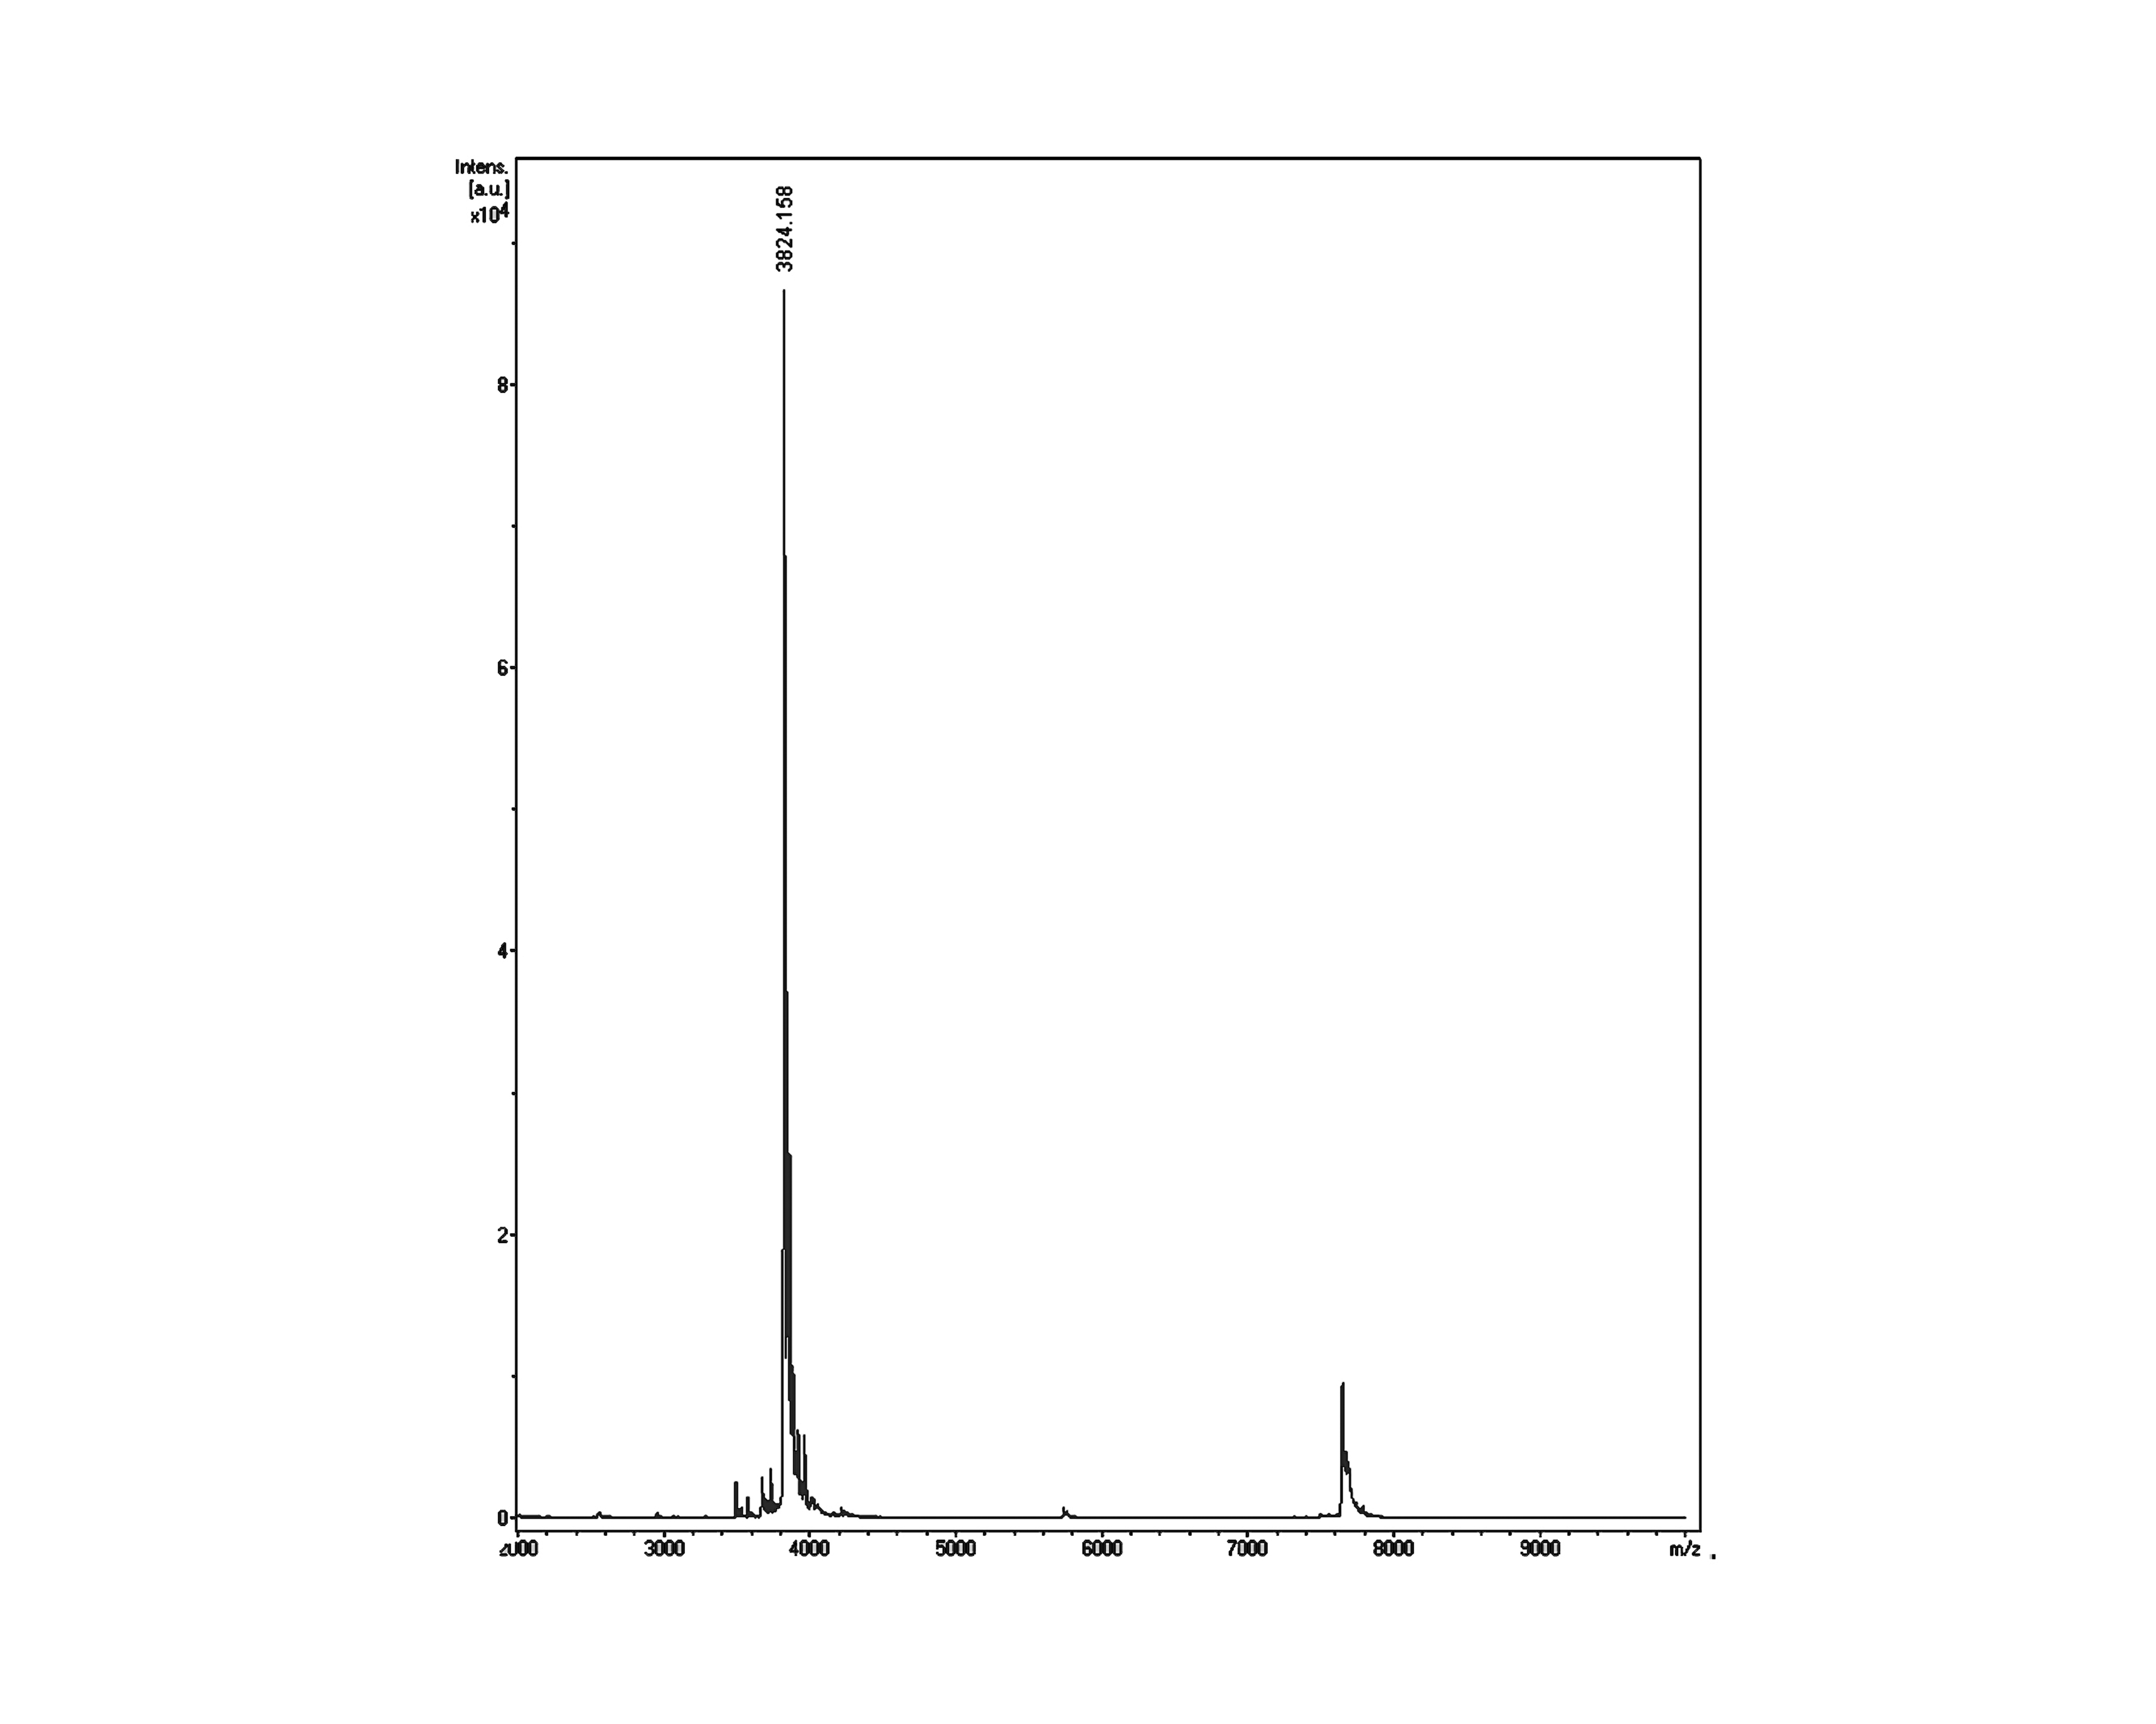


**Figure S54.** MALDI-TOF MS; Calcd. 3823.6 [M-H]−.

4. Half-Life Time of *cis*-dUAz Analogue Modified of ONs


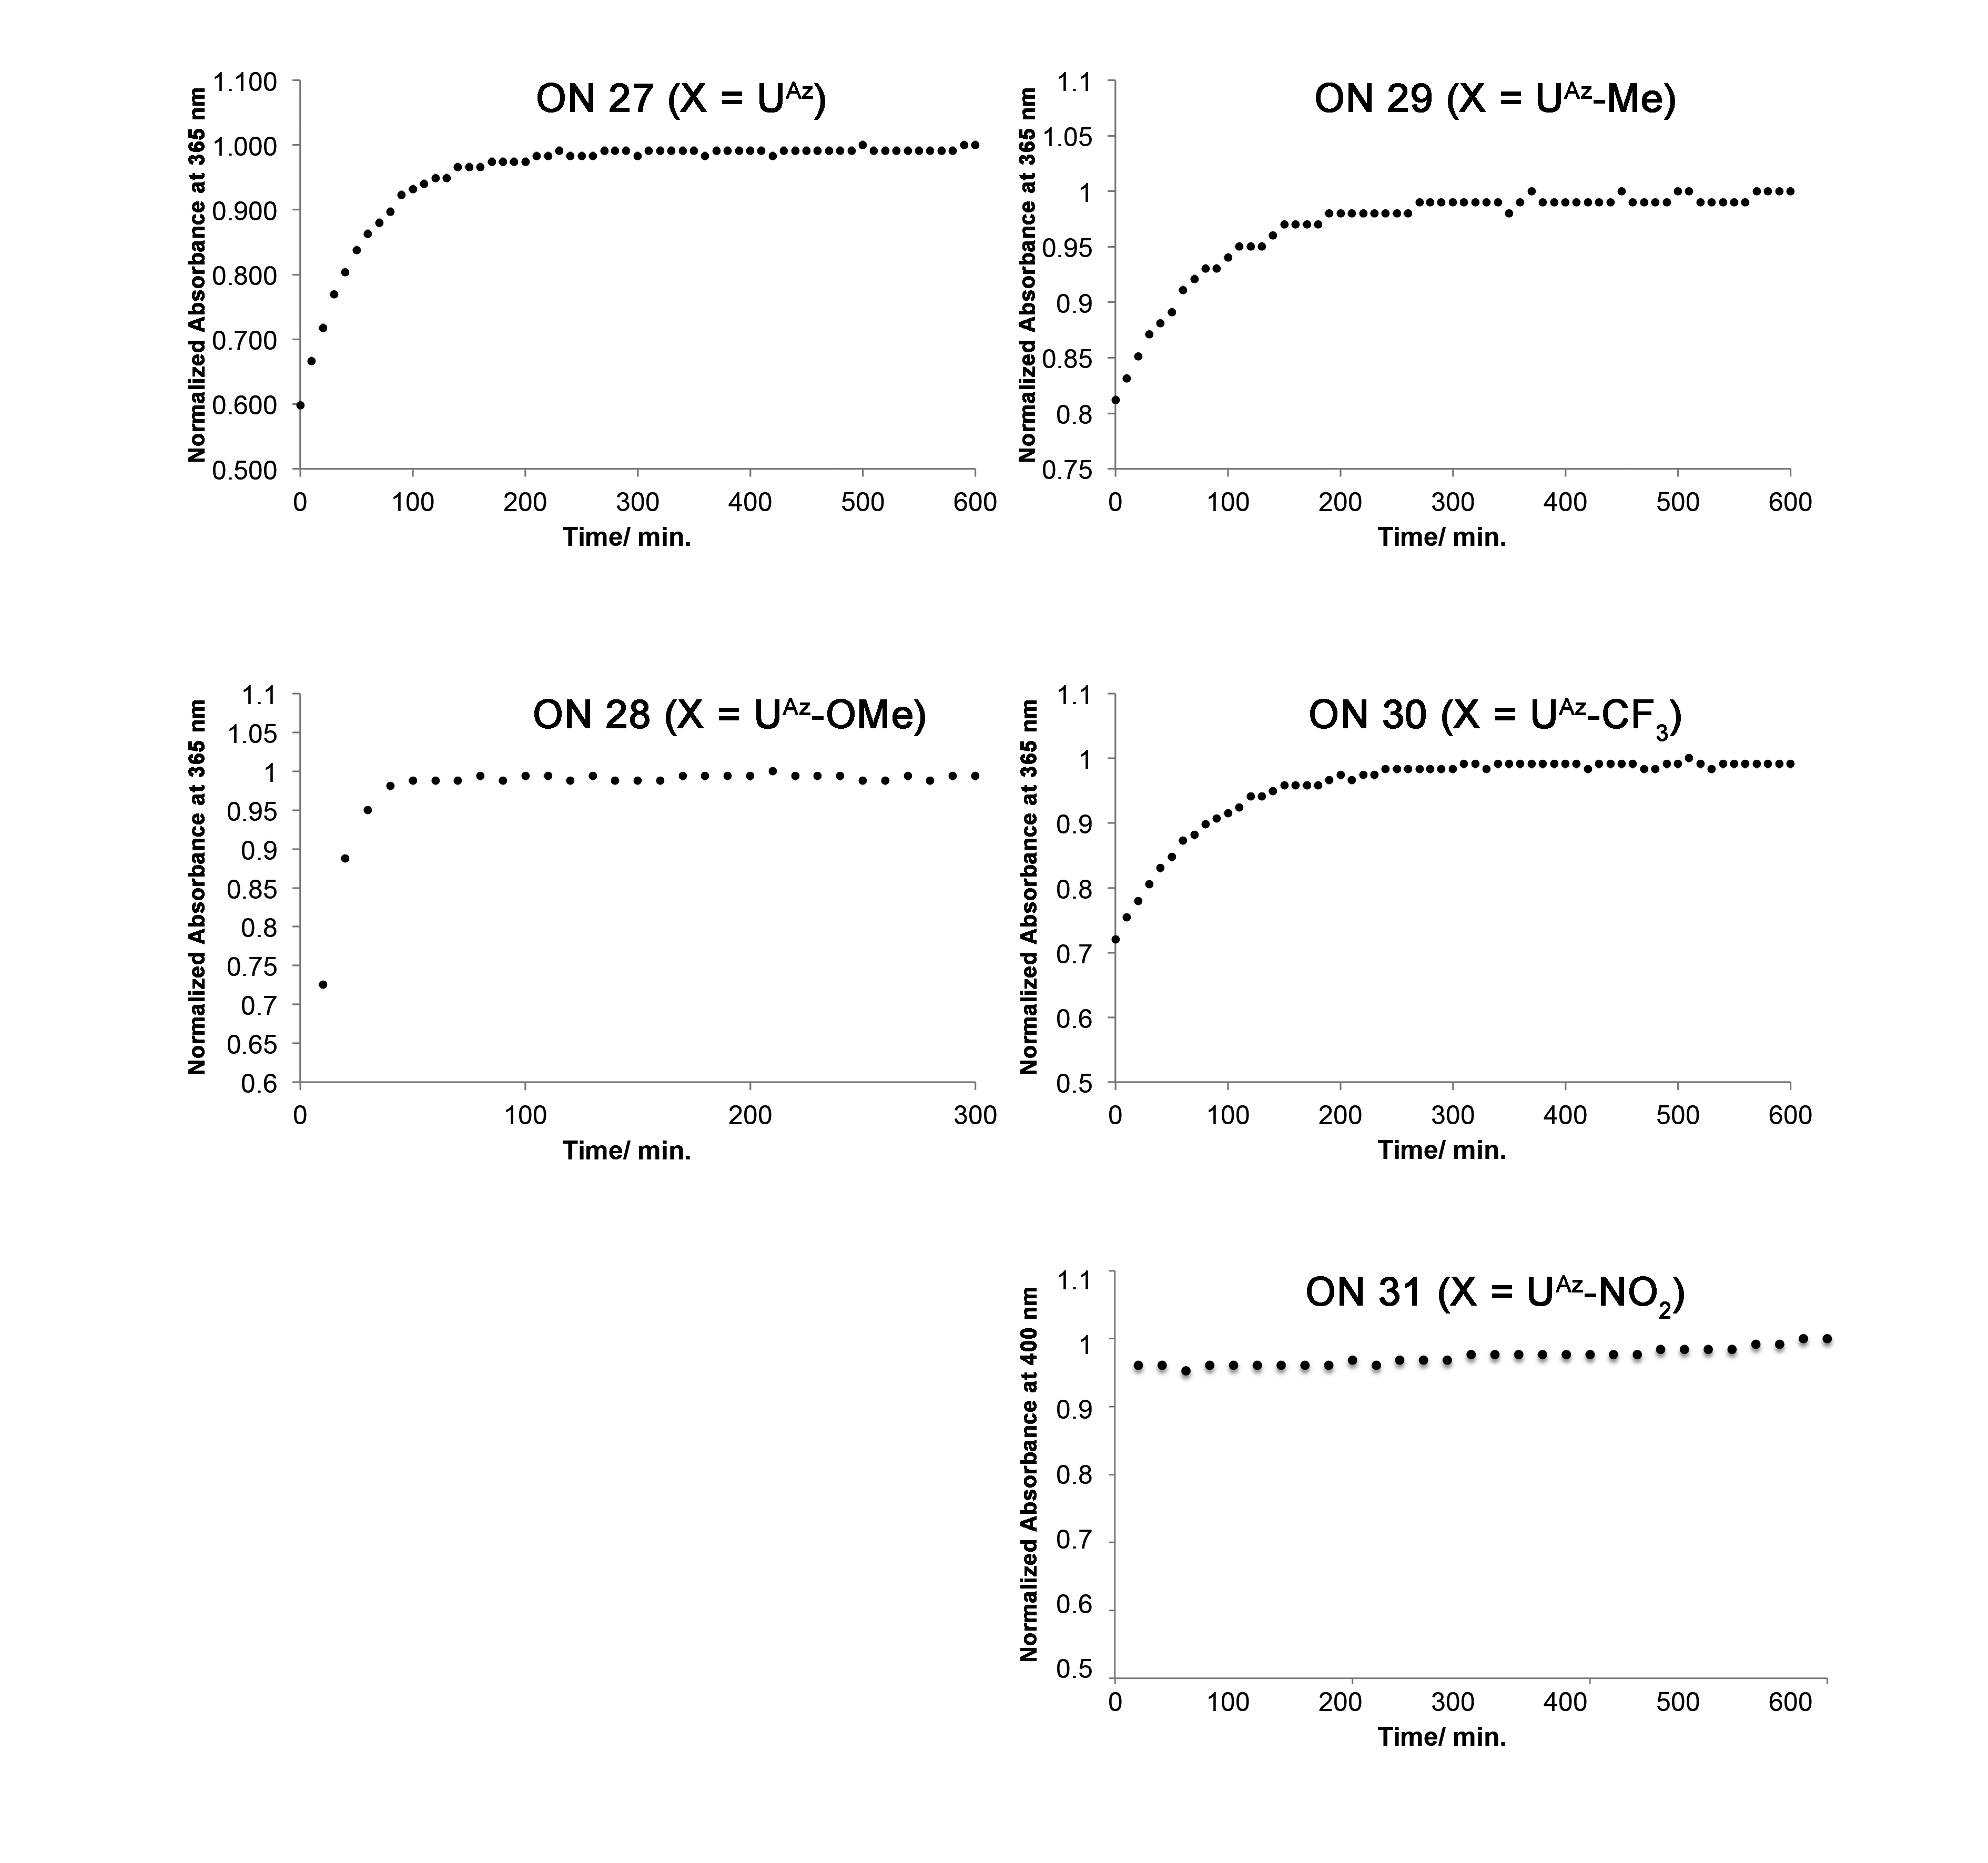


**Figure S55.** UV absorbance curves for *cis*-**dUAZ** analogue containing ON **27-31** at 60 °C.

5. UV Melting Curves of dUAz-Modified Duplexes


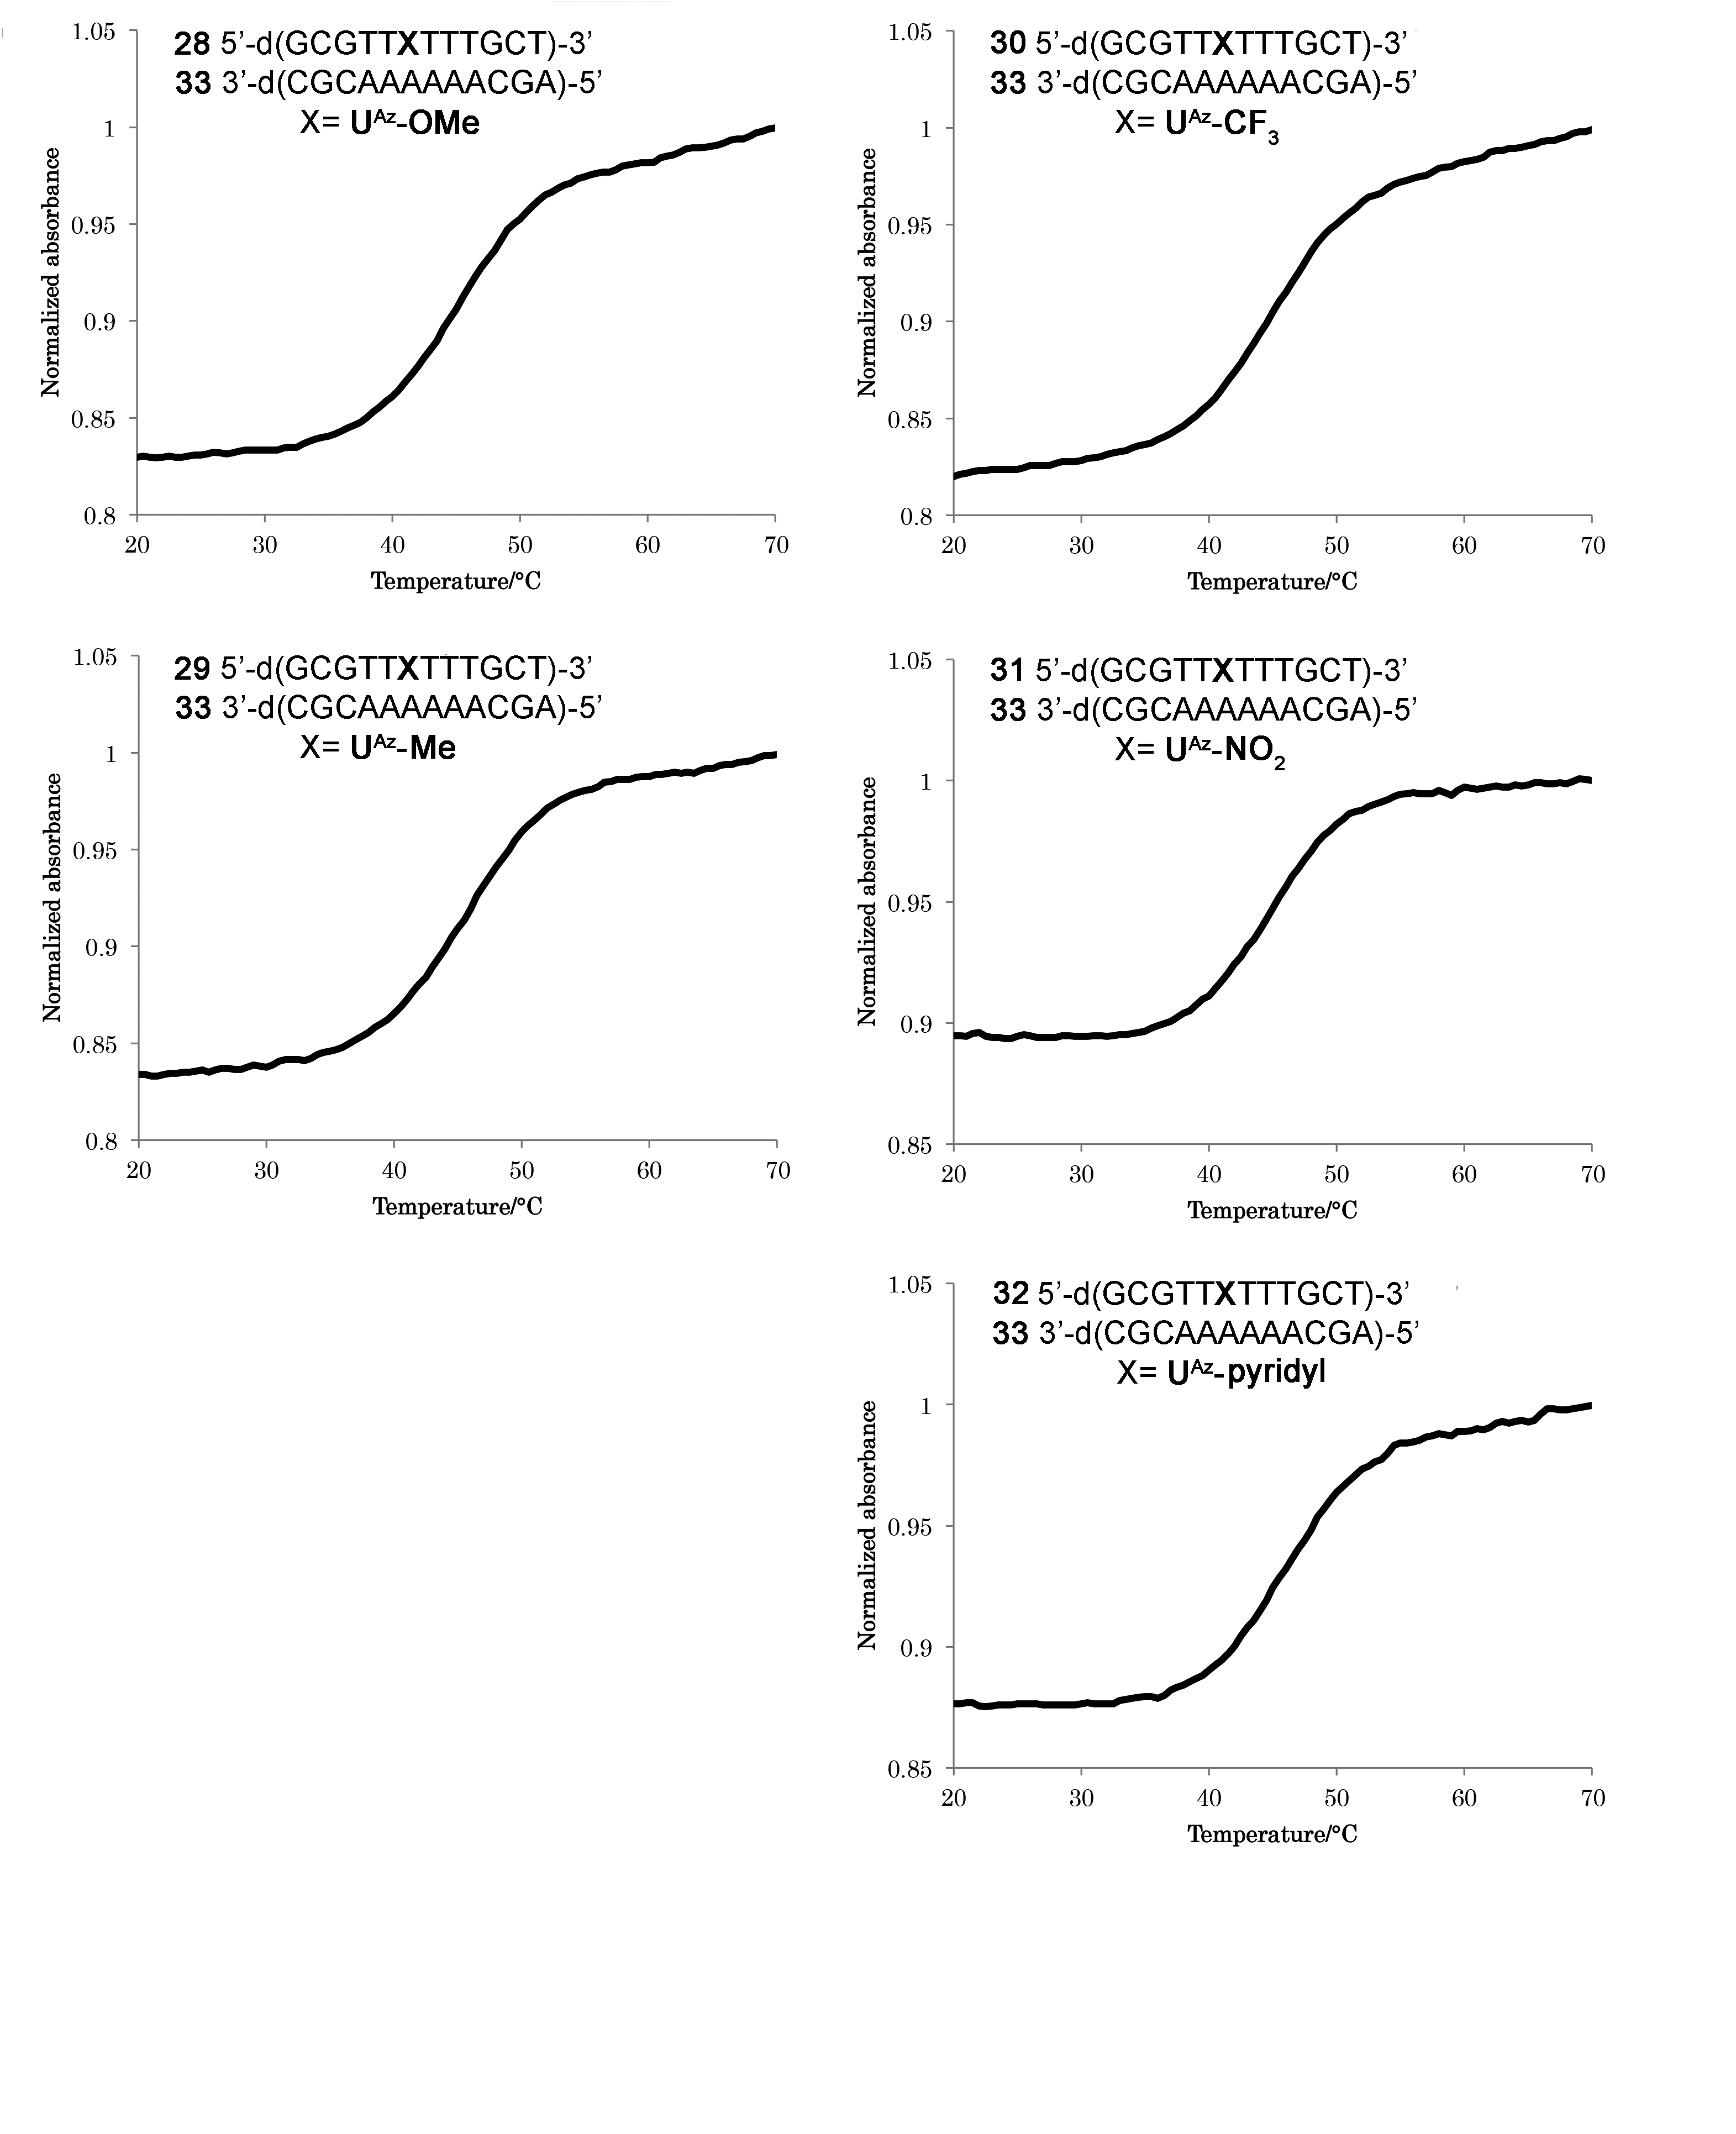


**Figure S56.** UV melting curves for the DNA/DNA duplexes formed between *trans*-**dUAZ** analogue containing ON **28-32** and ON **33**.


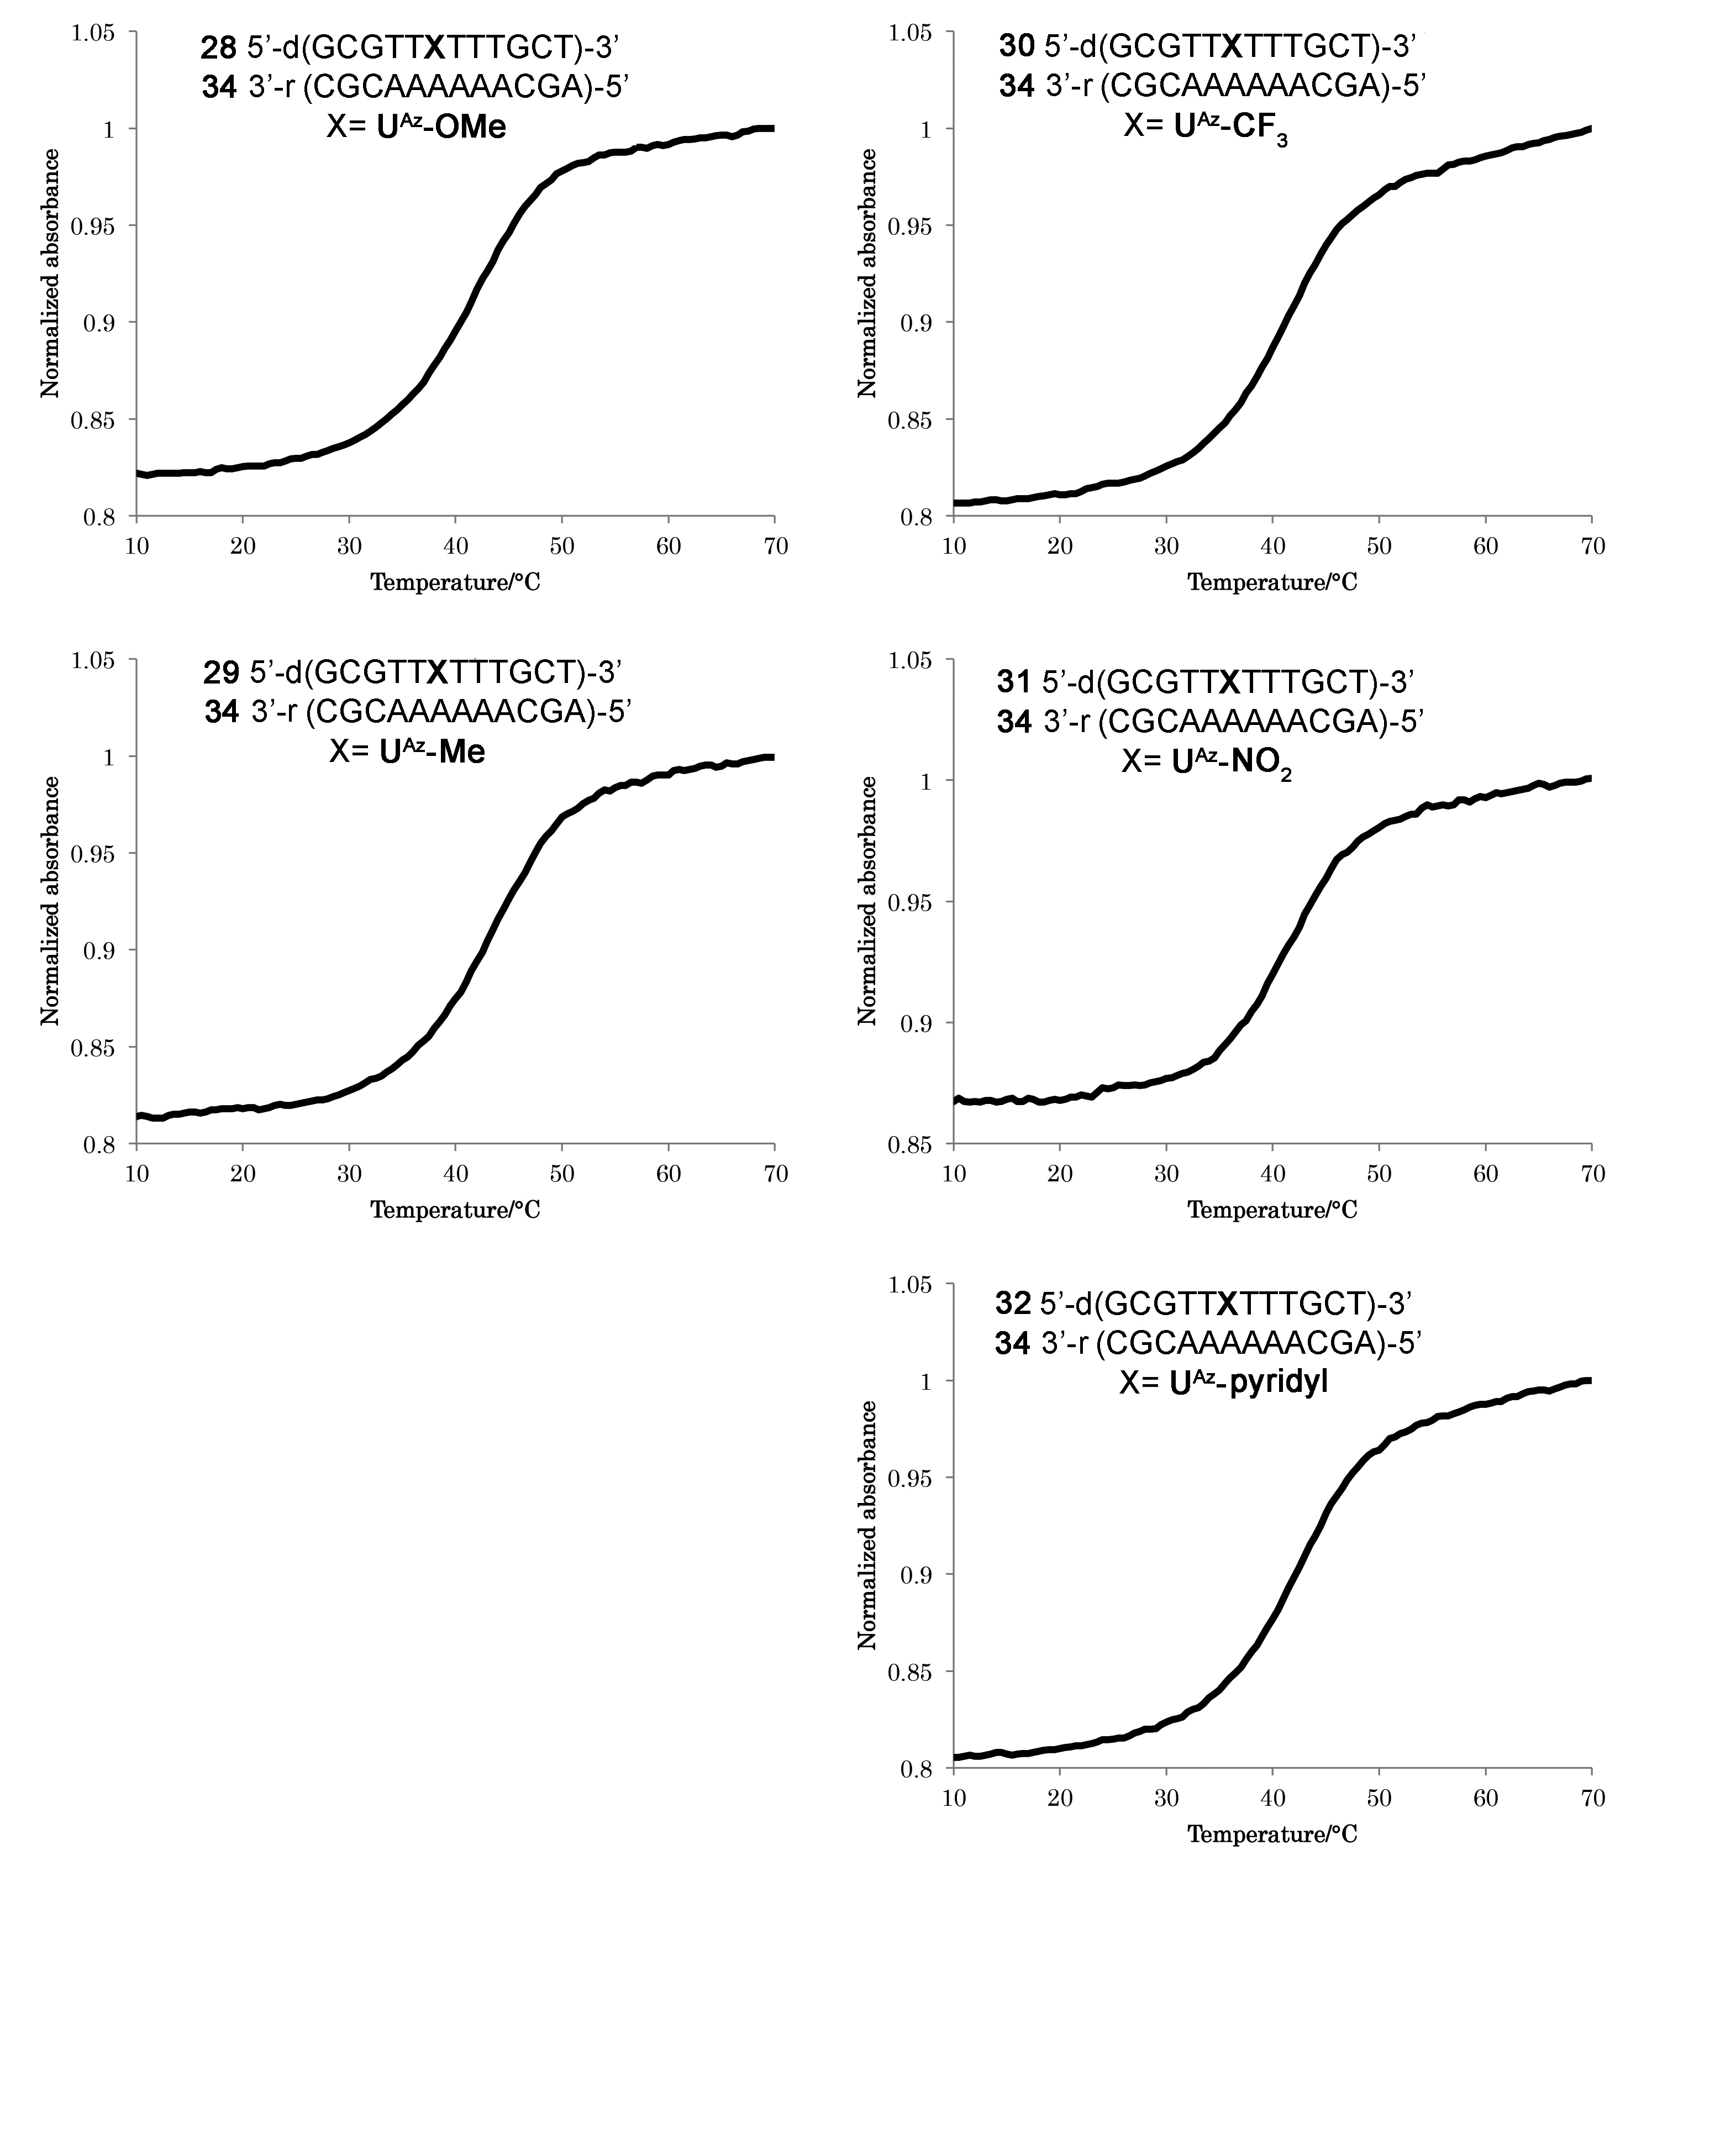


**Figure S57.** UV melting curves for the DNA/RNA duplexes formed between *trans*-**dUAZ** analogue containing ON **28-32** and ON **34**.

6. ITC Measurements of dUAz Analogue Modified ONs/Complementary RNA


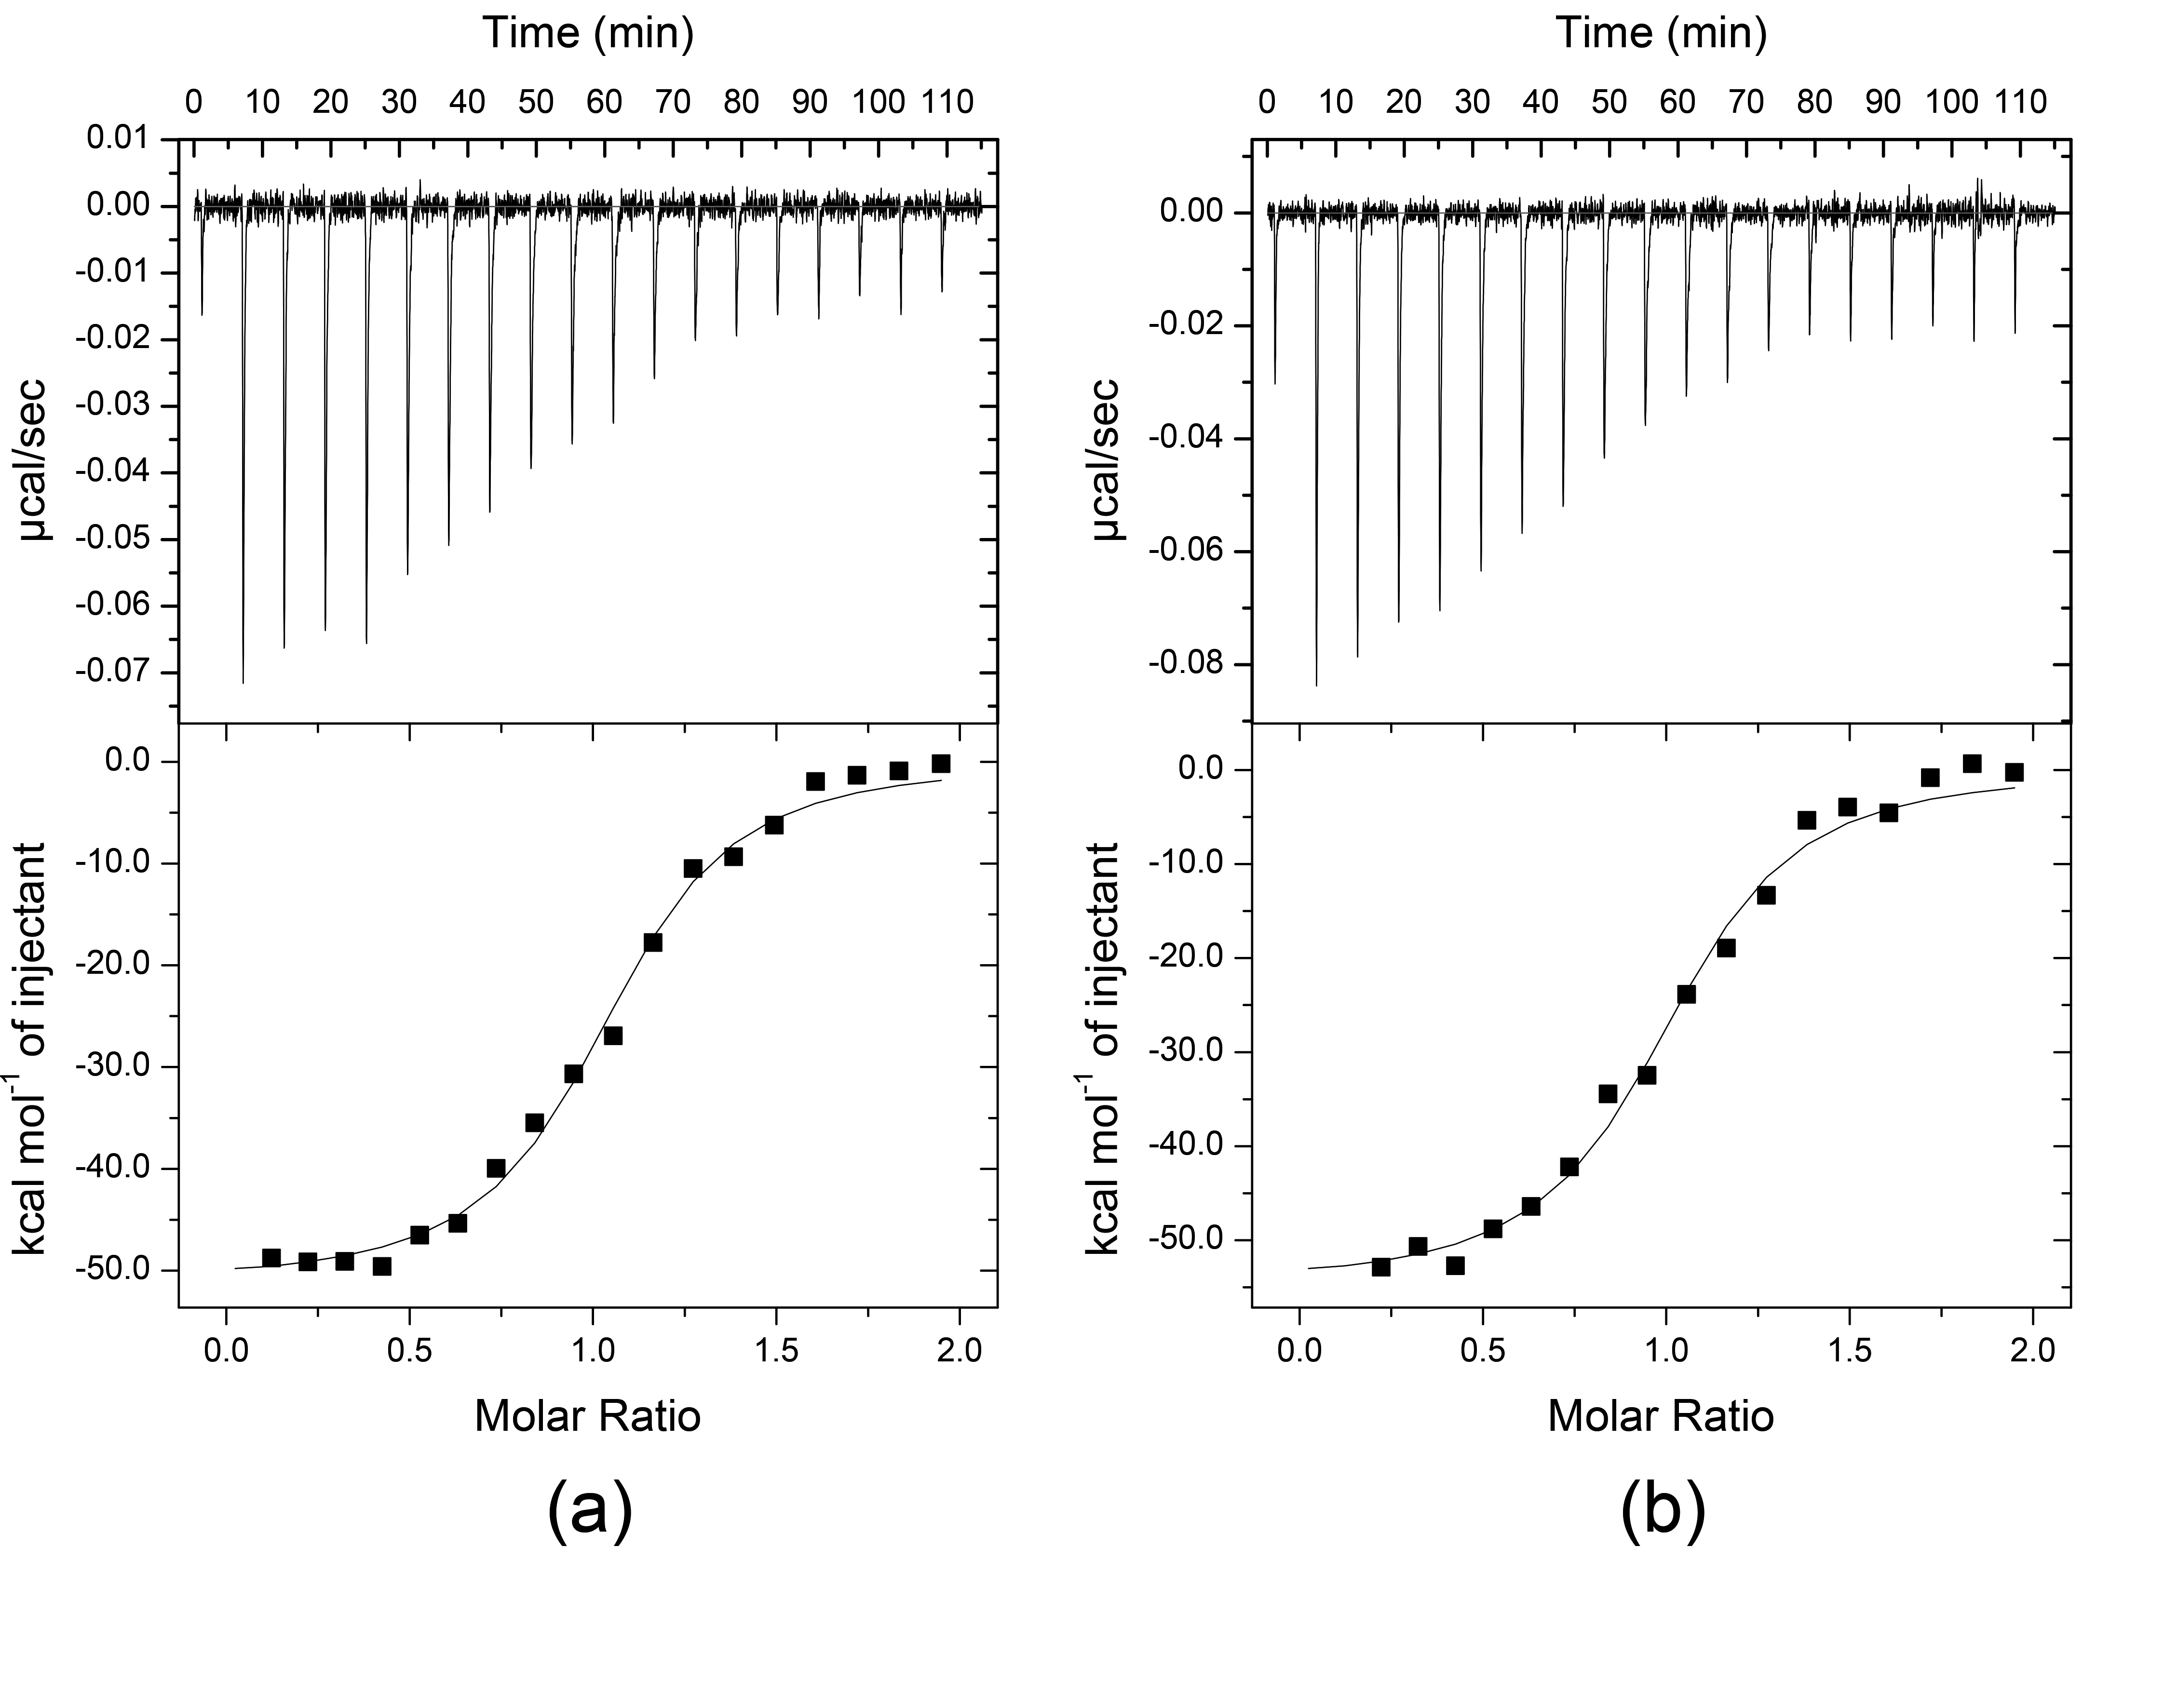


**Figure S58.** Representative ITC measurements on duplex formation between **dUAz-MeO** modified ON (**28**) and complementary RNA strand (**34**). (**a**) before irradiation, (**b**) after 365 nm irradiation for 10 s.


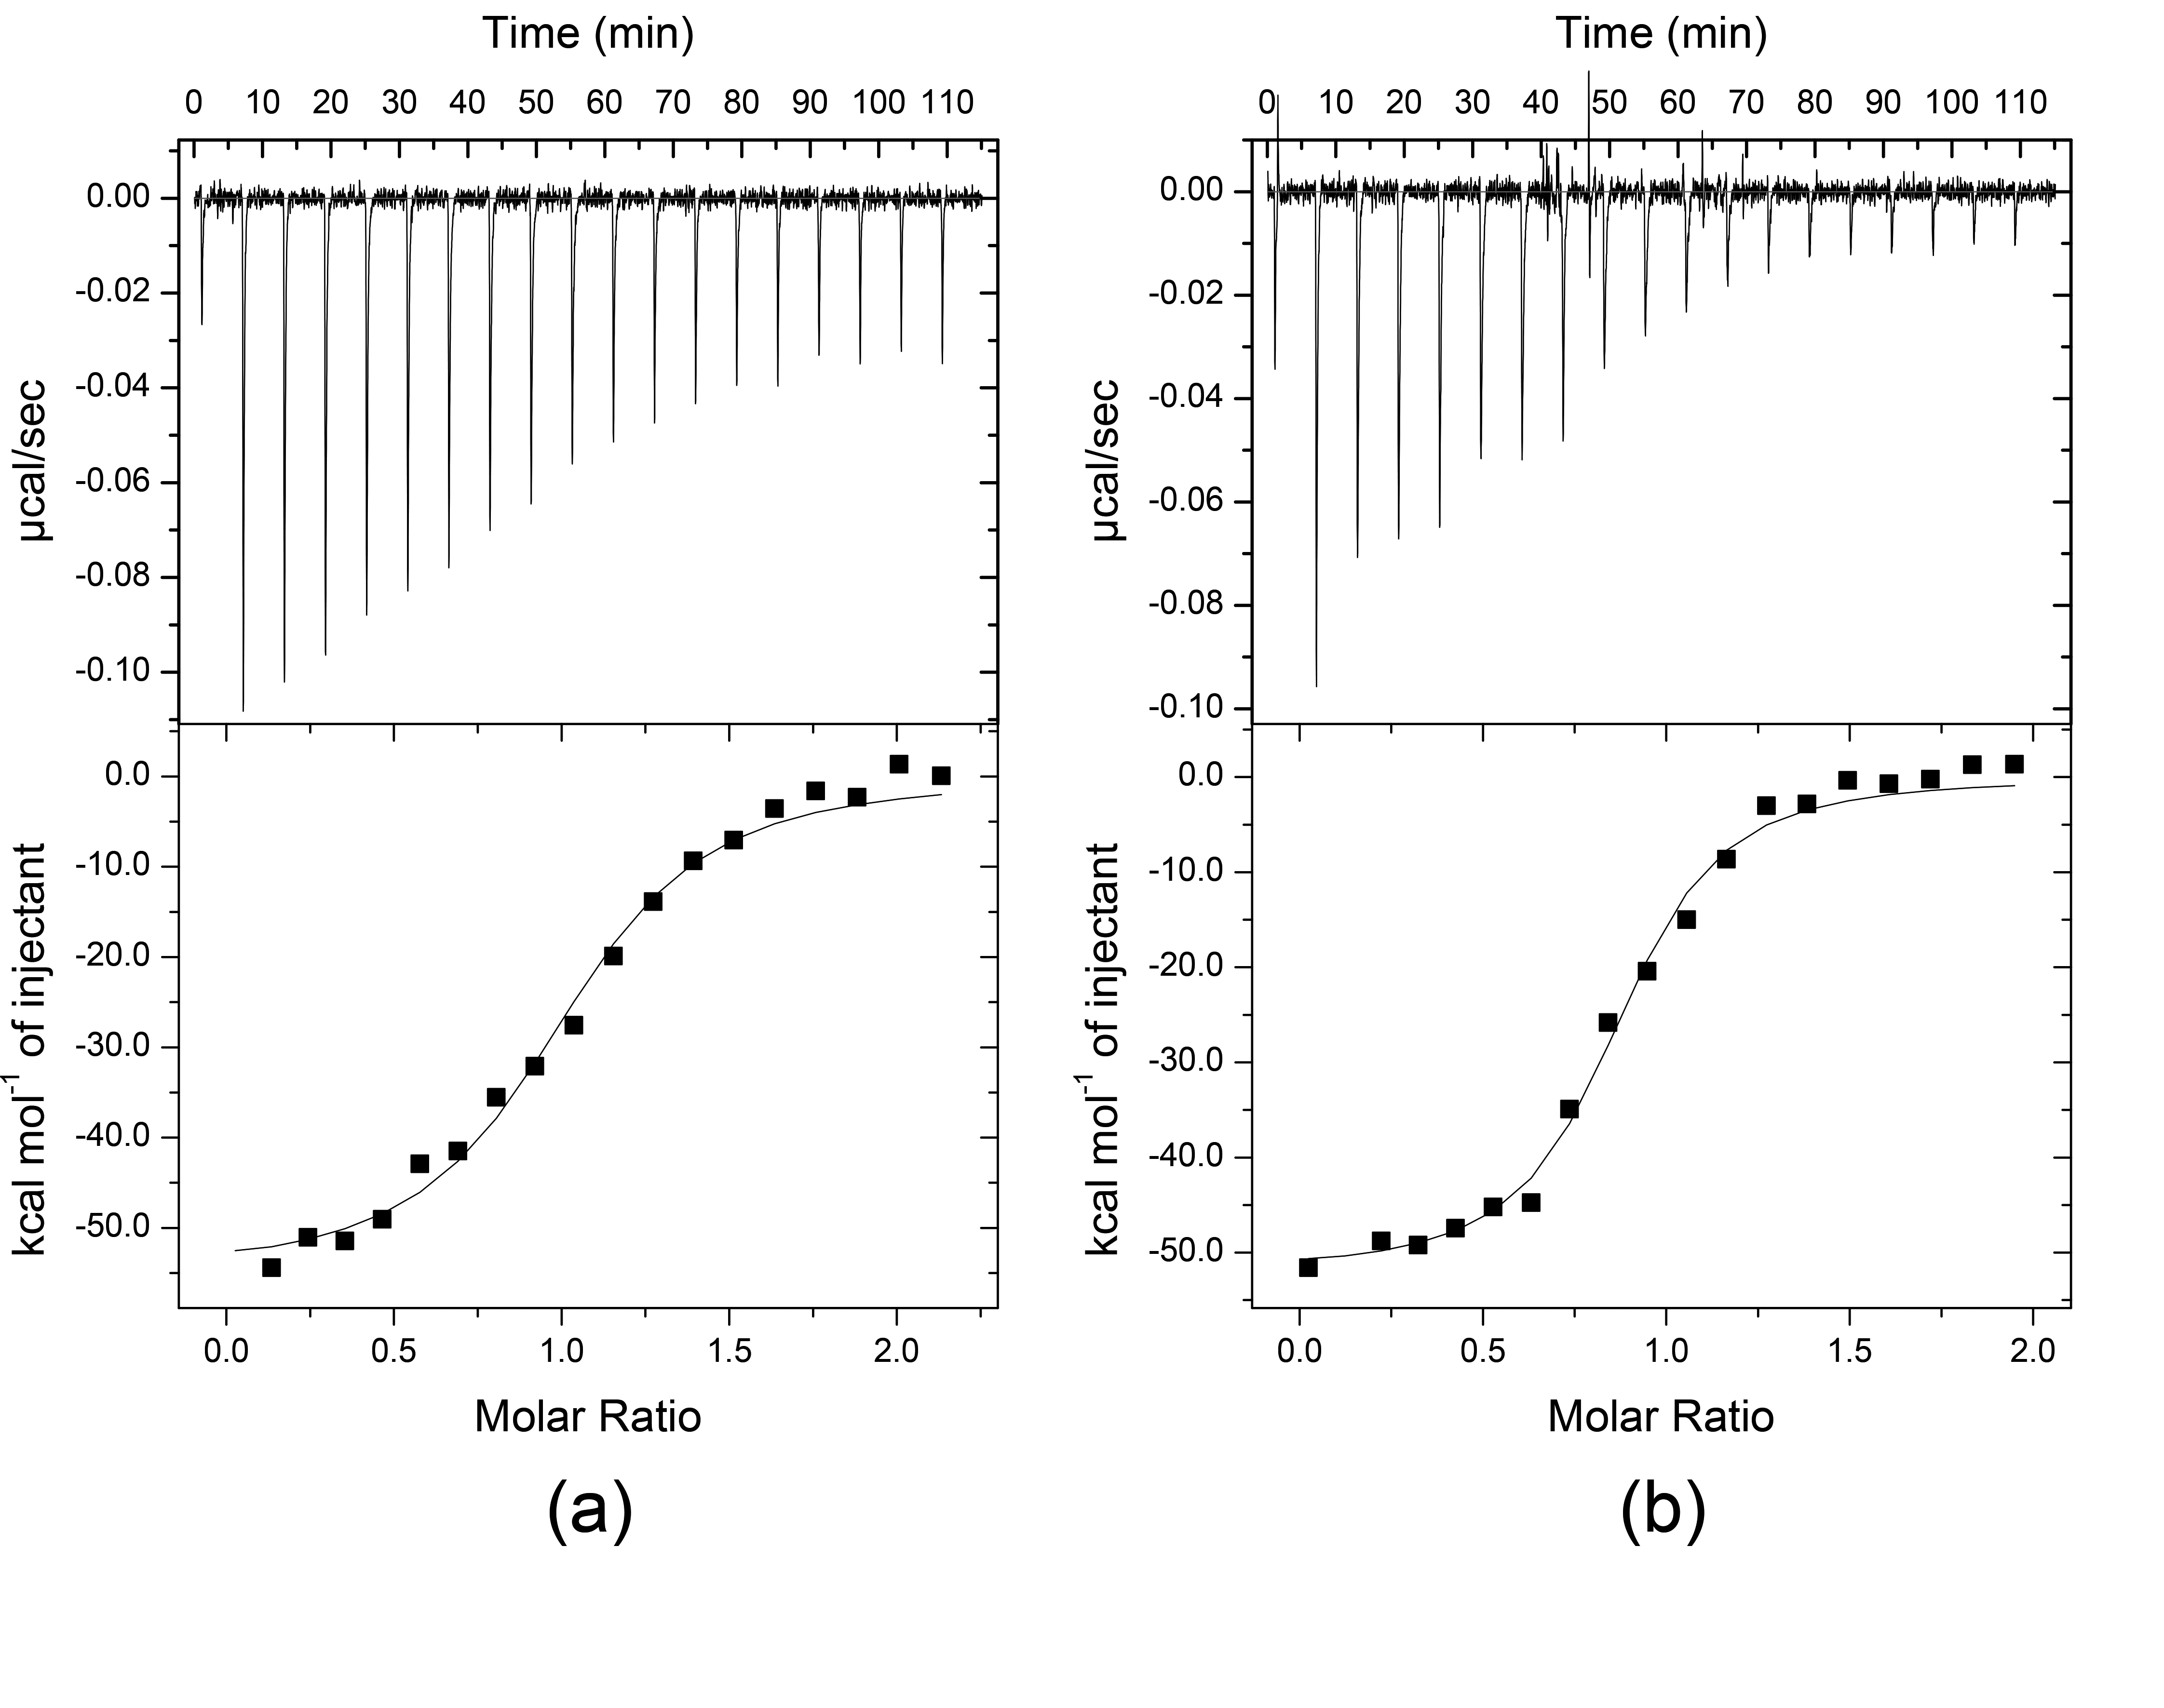


**Figure S59.** Representative ITC measurements on duplex formation between **dUAz-Me** modified ON (**29**) and complementary RNA strand (**34**). (**a**) before irradiation, (**b**) after 365 nm irradiation for 10 s.

© 2015 by the authors; licensee MDPI, Basel, Switzerland. This article is an open access article distributed under the terms and conditions of the Creative Commons Attribution license (http://creativecommons.org/licenses/by/4.0/).
